# Supplementary material for: Molecular Mechanisms in Murine Syngeneic Leukemia Stem Cells
Source: MDPI journal article supplement (doi:10.3390/cancers15030720), 2023-01-24
Supplement: s1 [file s1]

Supplementary  
information for  
Molecular mechanisms  
in Murine Syngeneic  
Leukemia Stem Cells

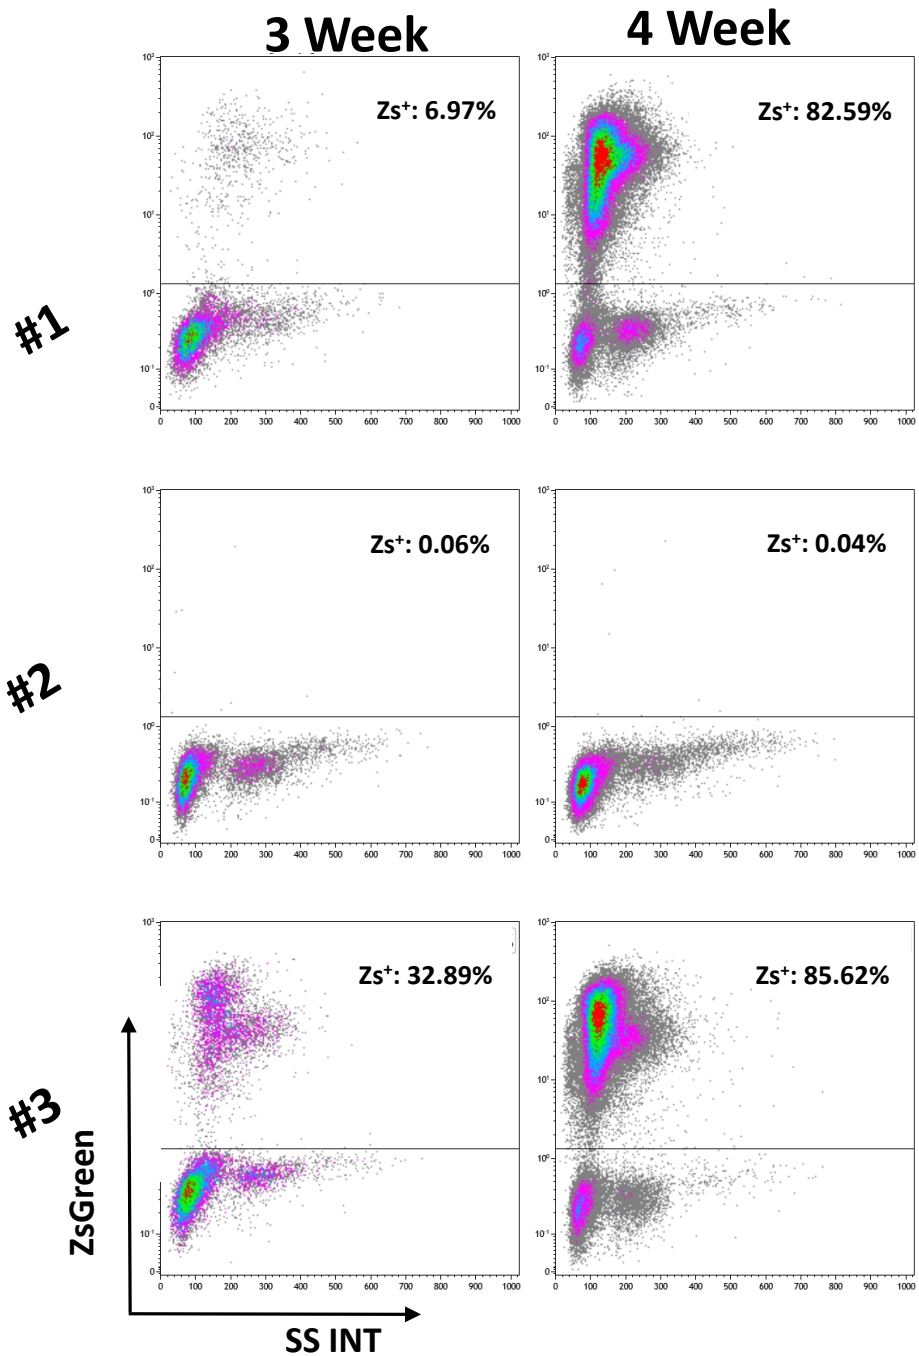

**Figure S1. ML23 line presents consistent and stable leukemia development:** Frozen BM cells from ML23 leukemic mice were defrosted and then transplanted into 3 recipients mice ( $5.5 \times 10^5$  cells each). The leukemic reporter ZsGreen+ (Y-axis) was initially found in the PB of 2 mice (#1 and #3) after 3 weeks. Within 4 weeks of transplantation mice #1 and #3 presented acute leukemia phenotype and high ZsGreen+ expression of PB cells.

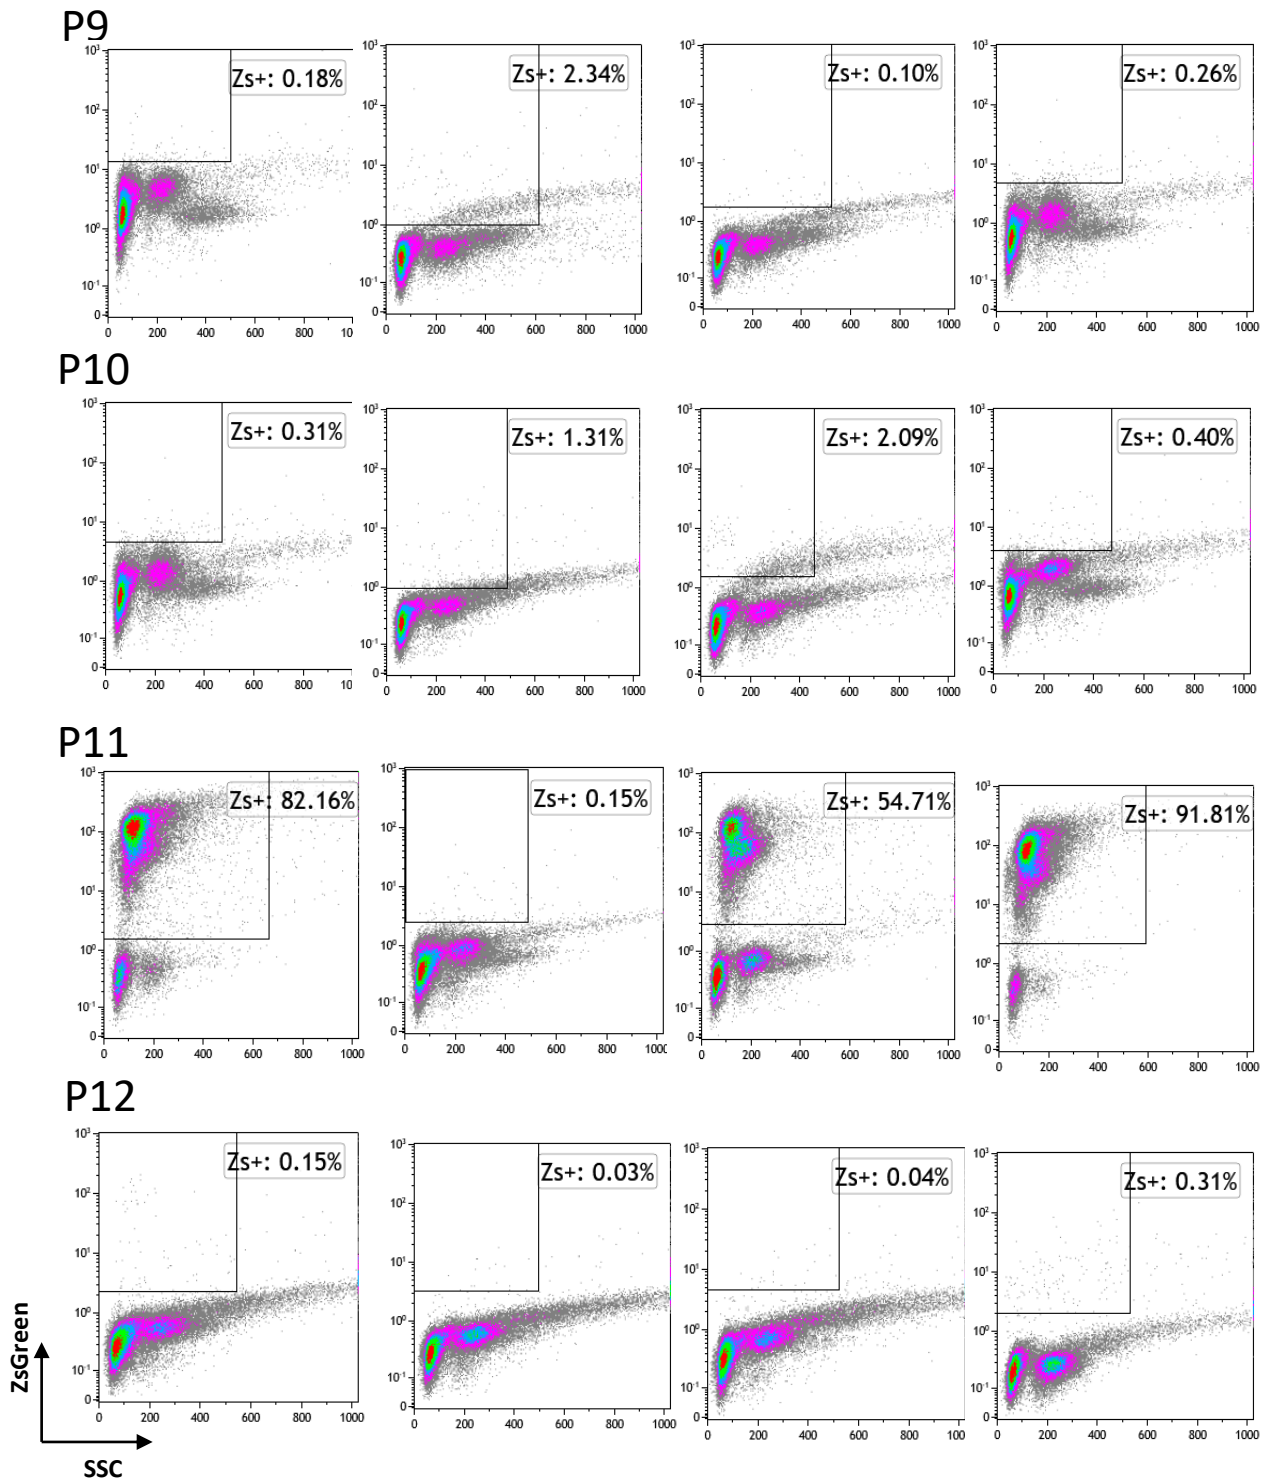

**Figure S2. FACS plots for ZsGreen in the different subpopulations of ML23:**  
 FACS plots describing the amount of ZsGreen+ expressed in each sample for each of the subpopulations. This data is a representative for 3 independent experiments.

(a)

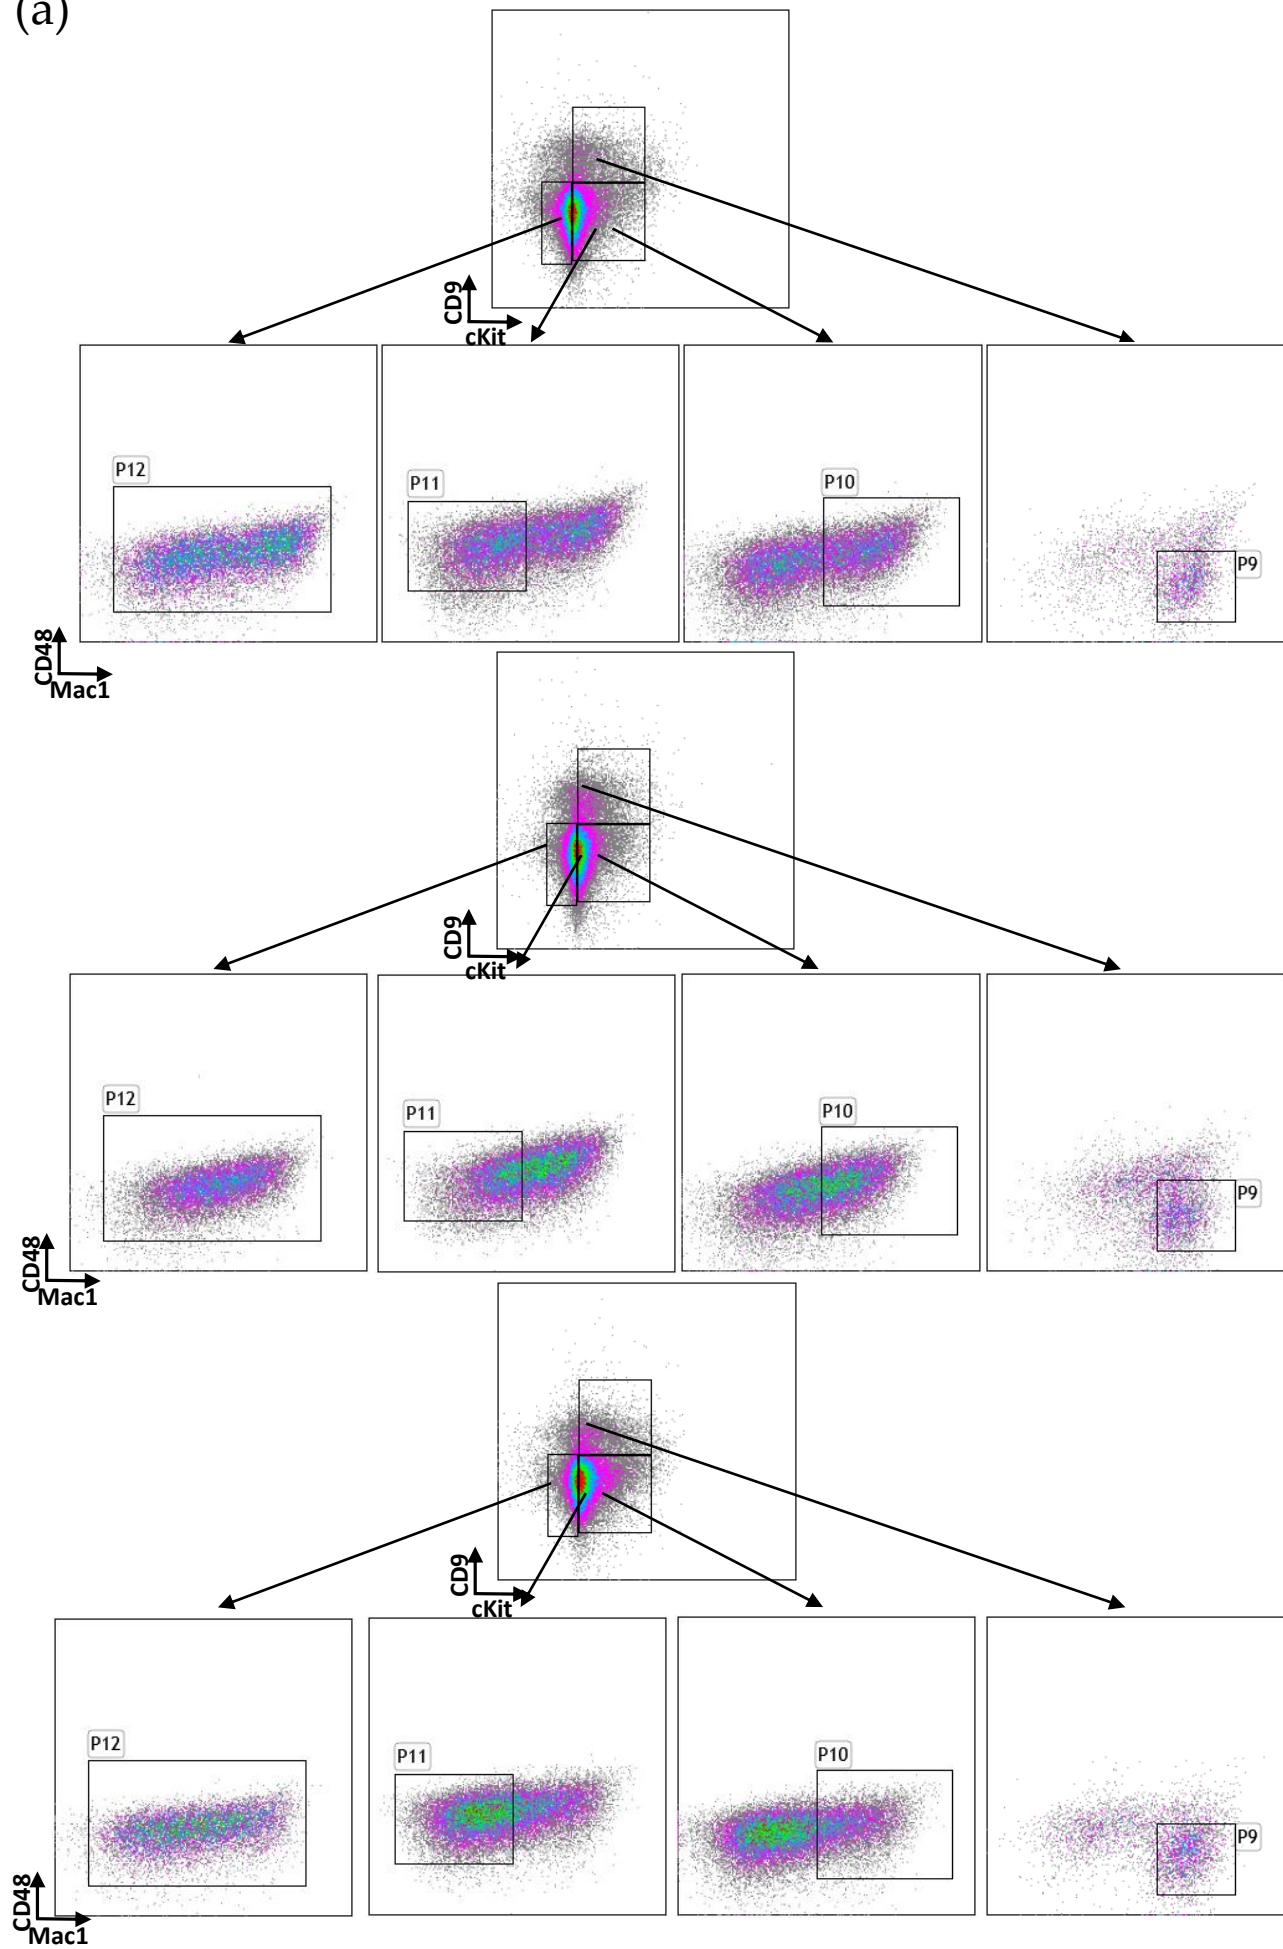

(b)

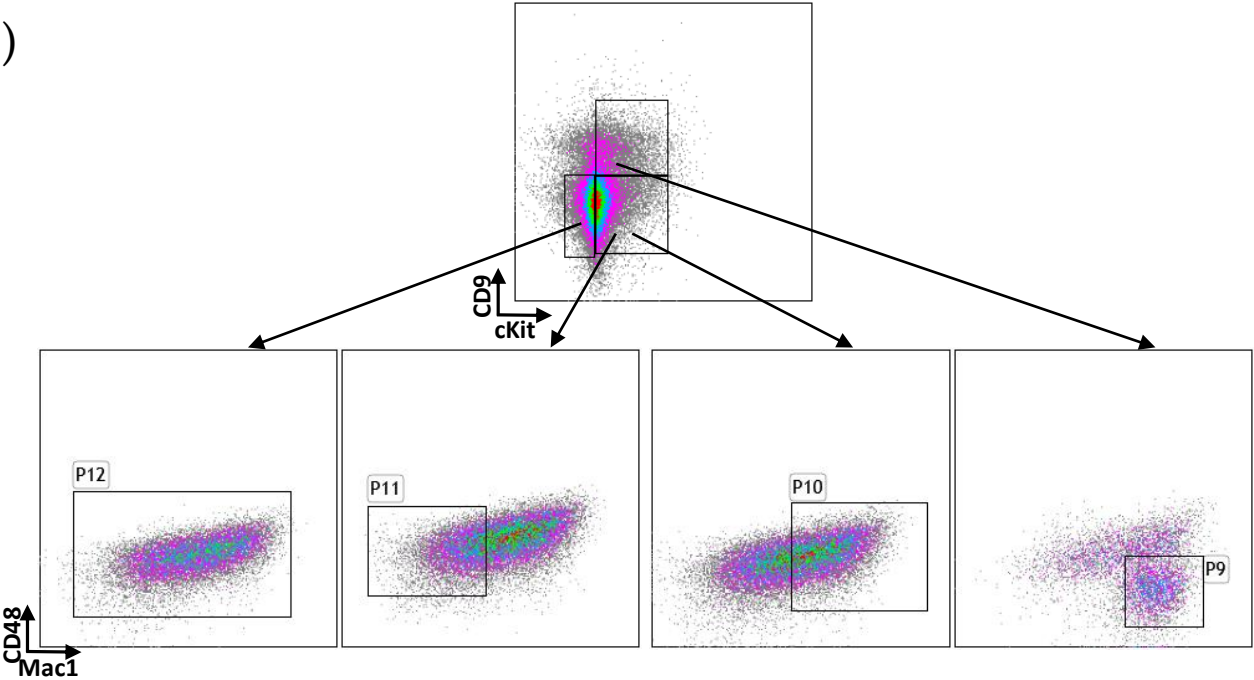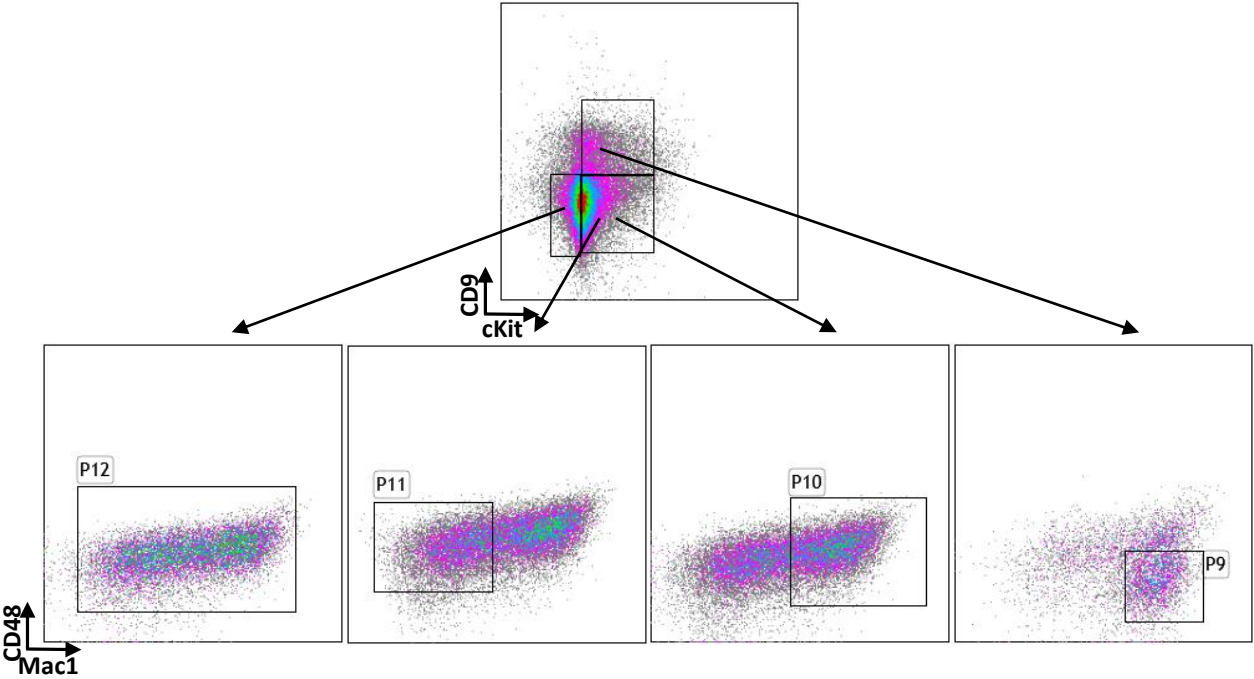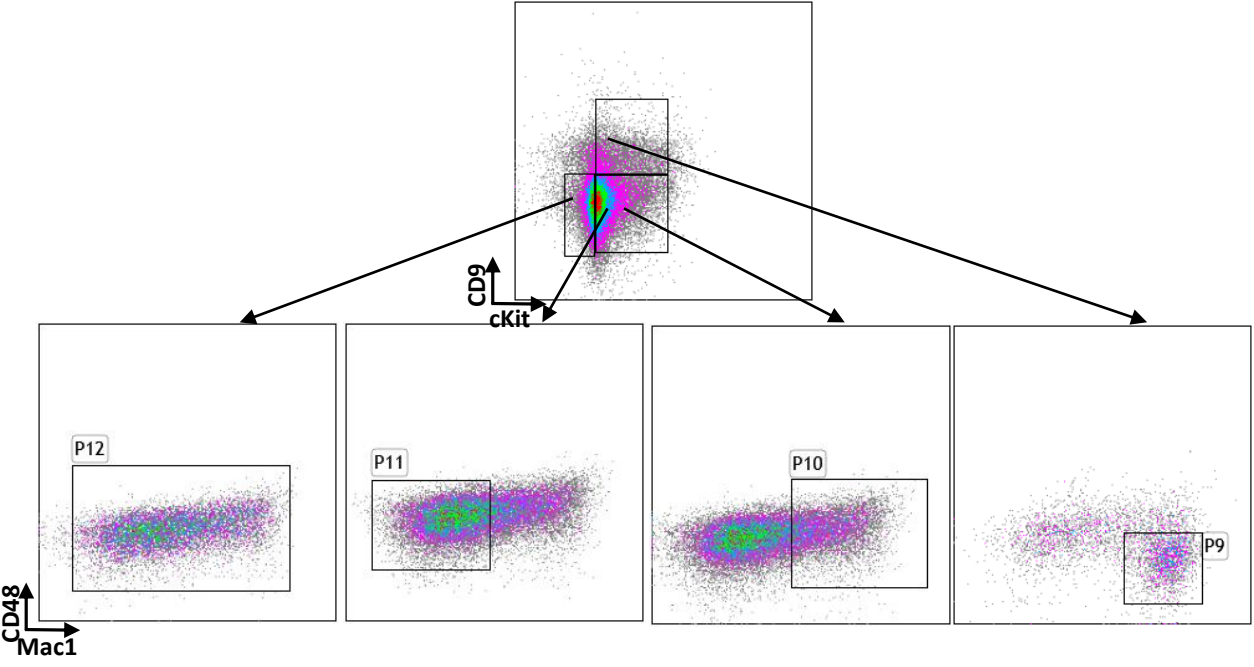



(c)

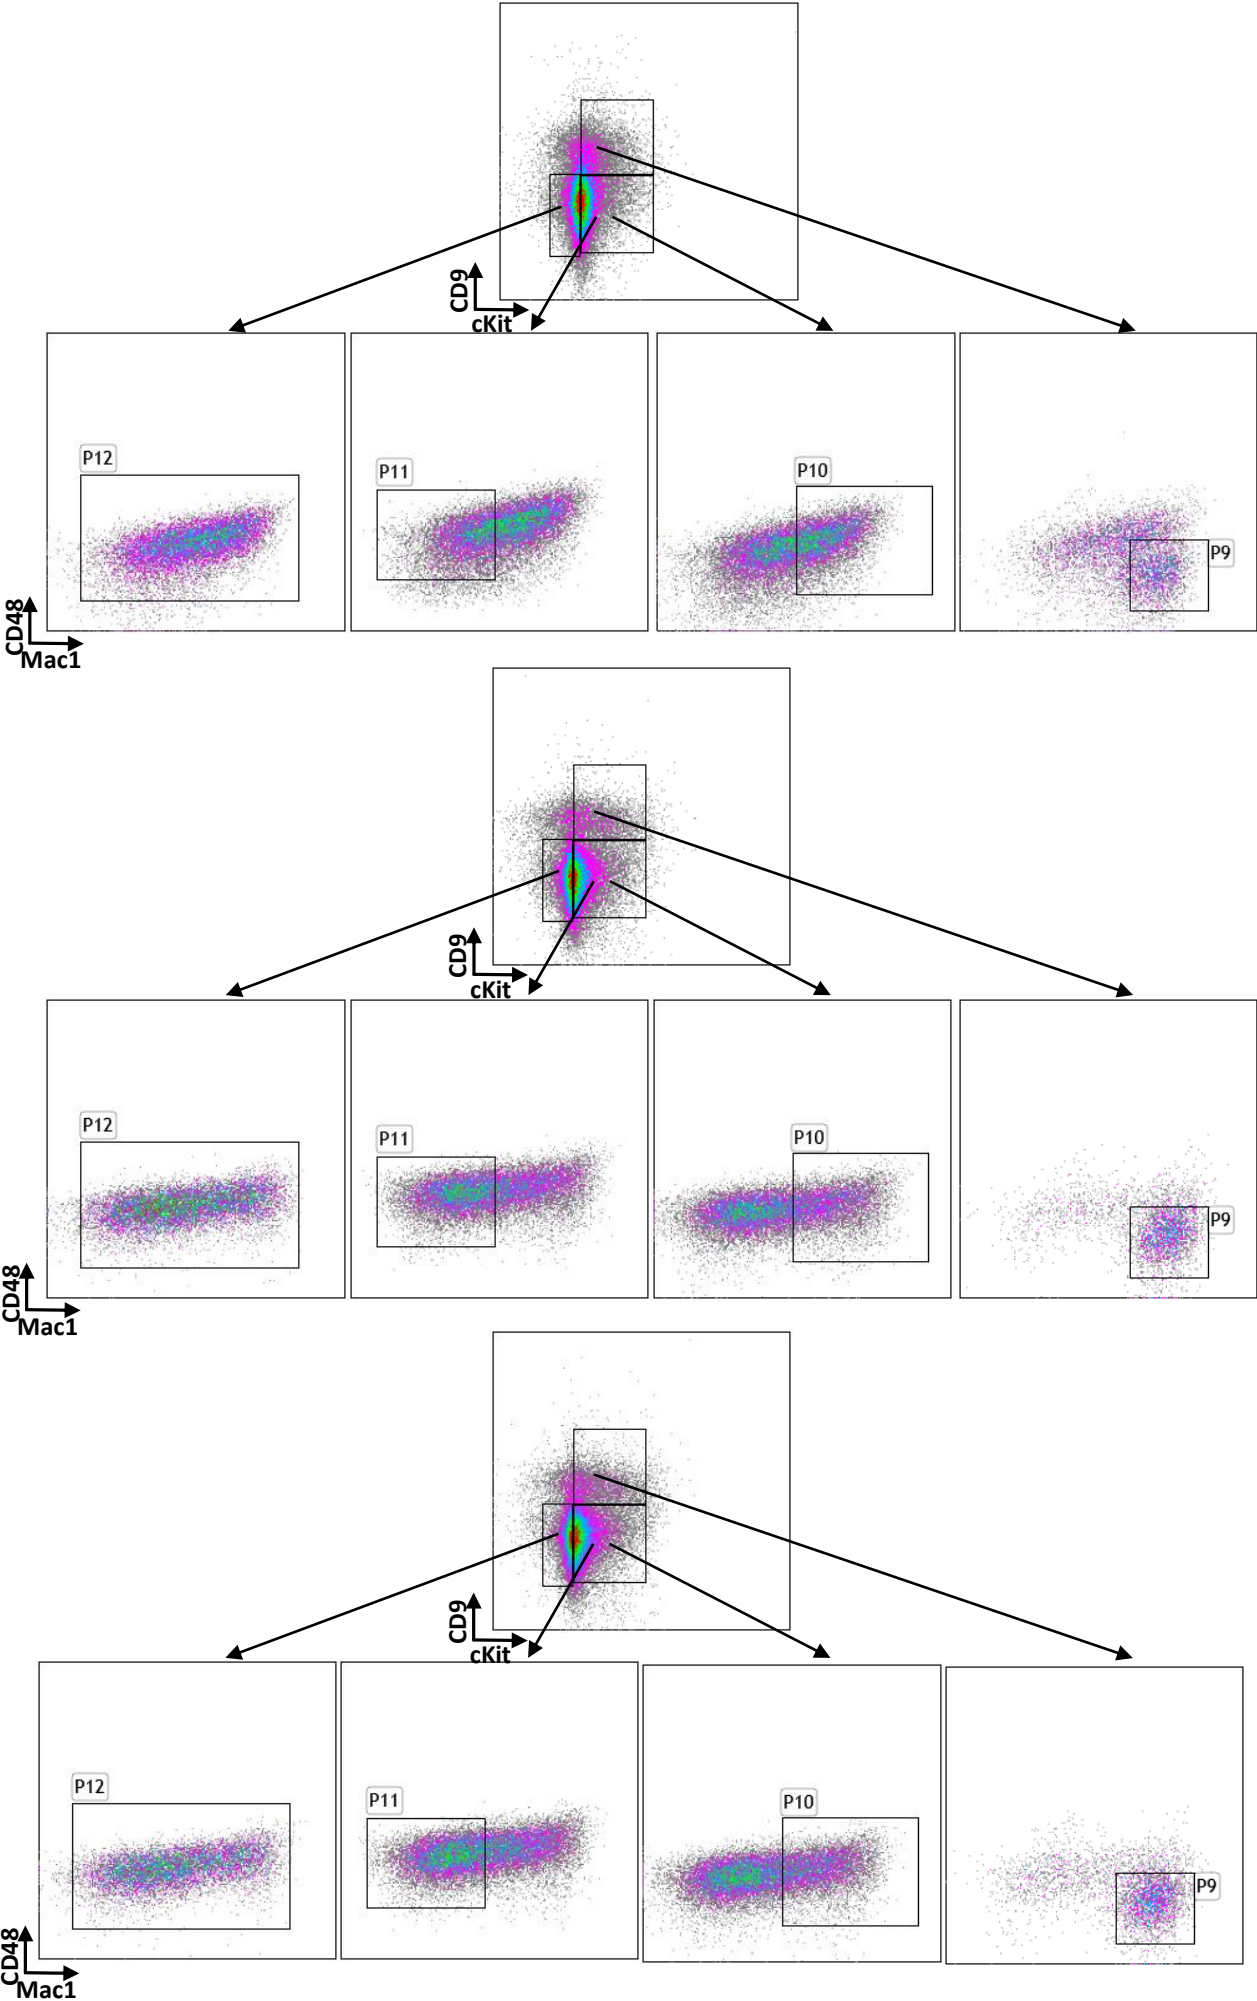

(d)

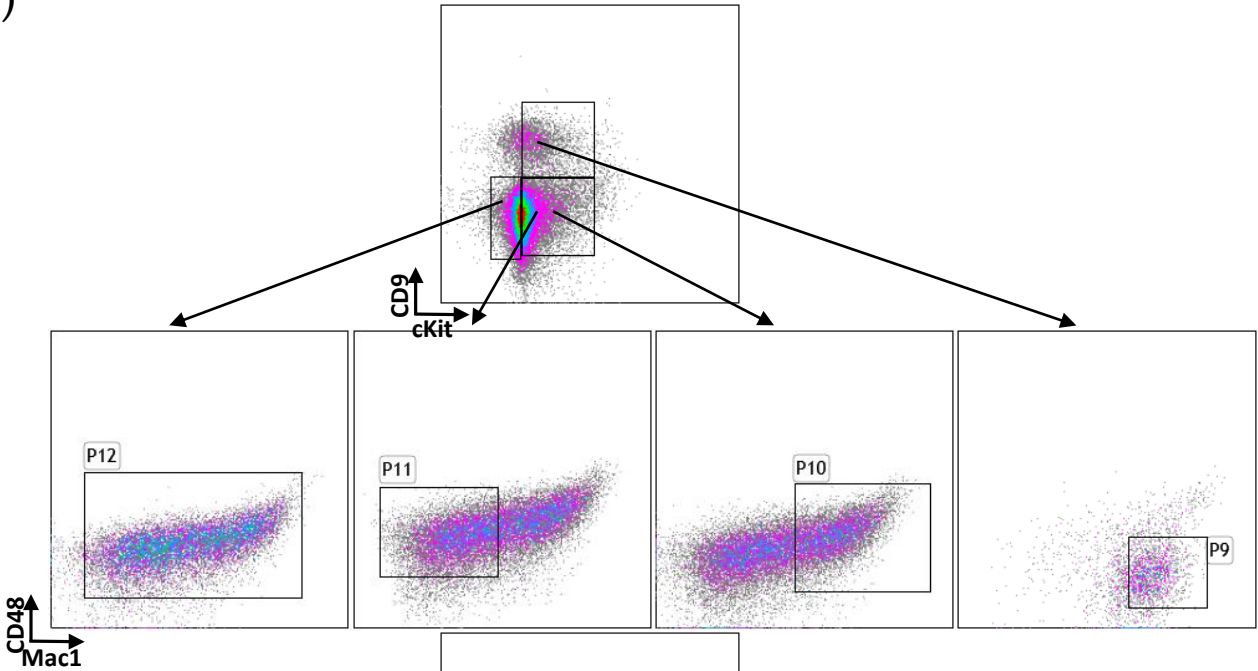

(e)

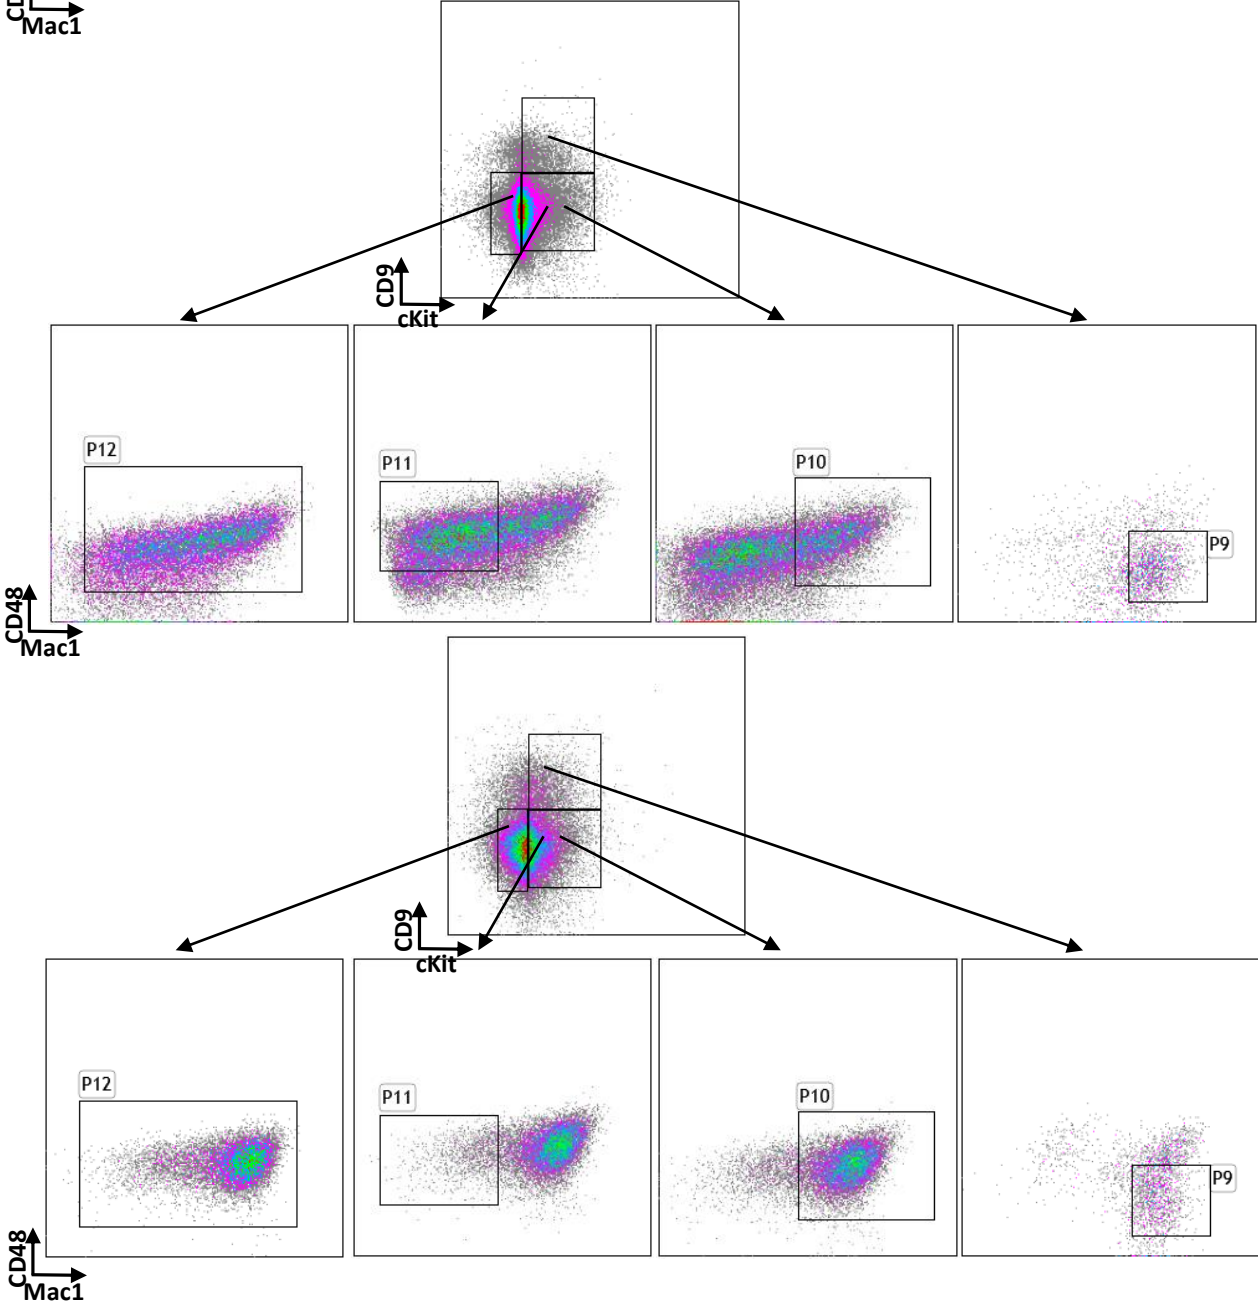

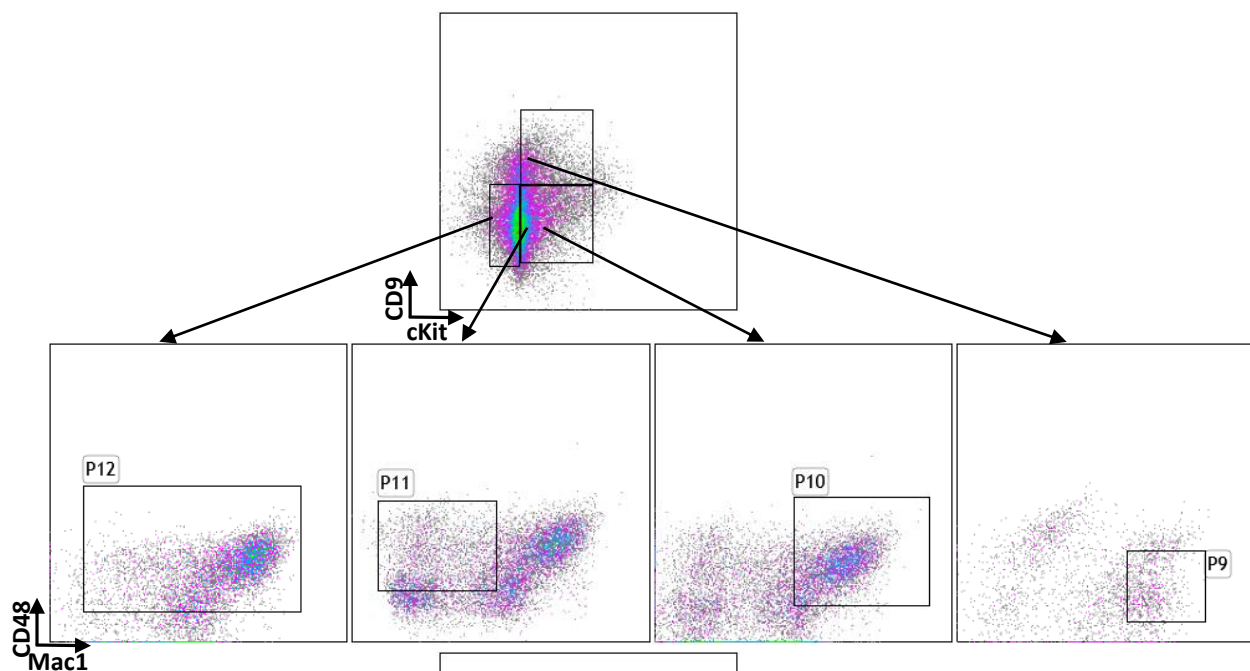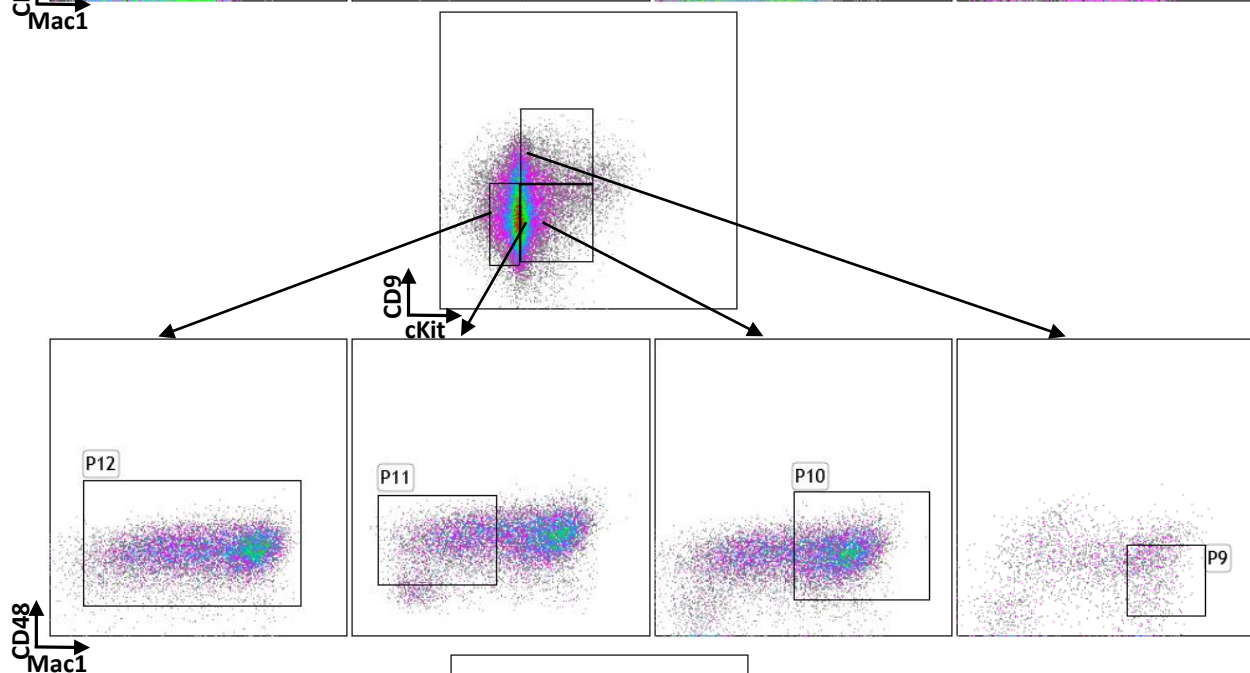

(f)

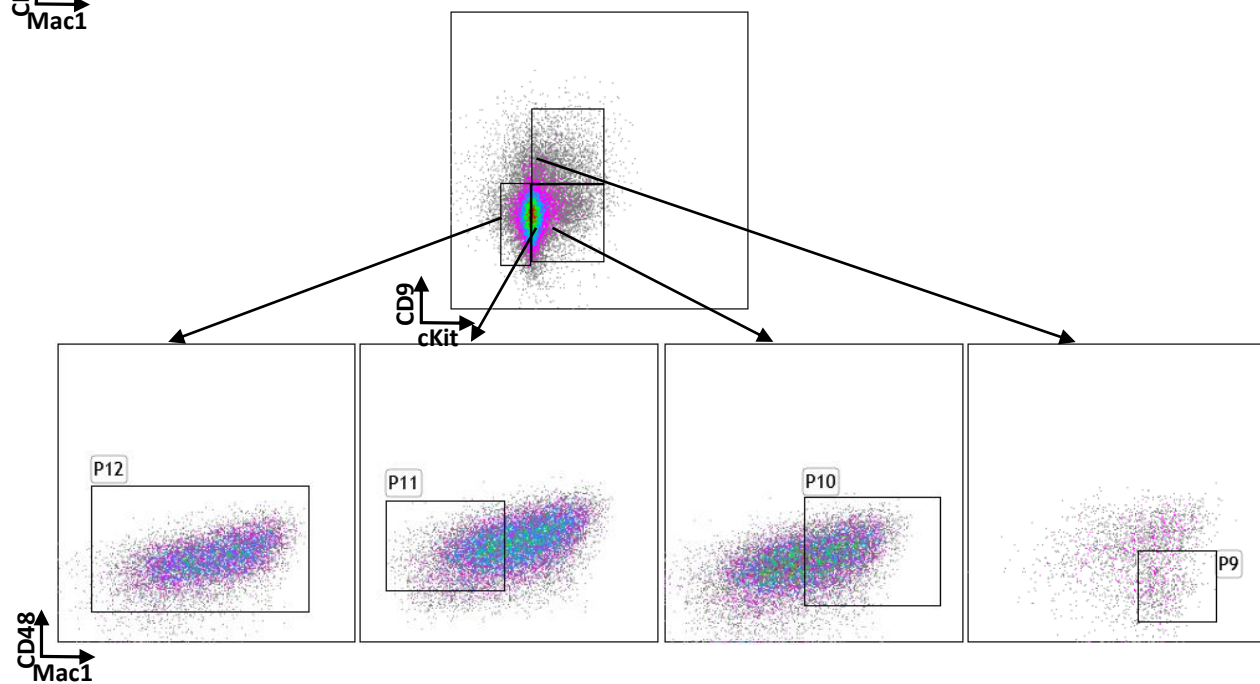



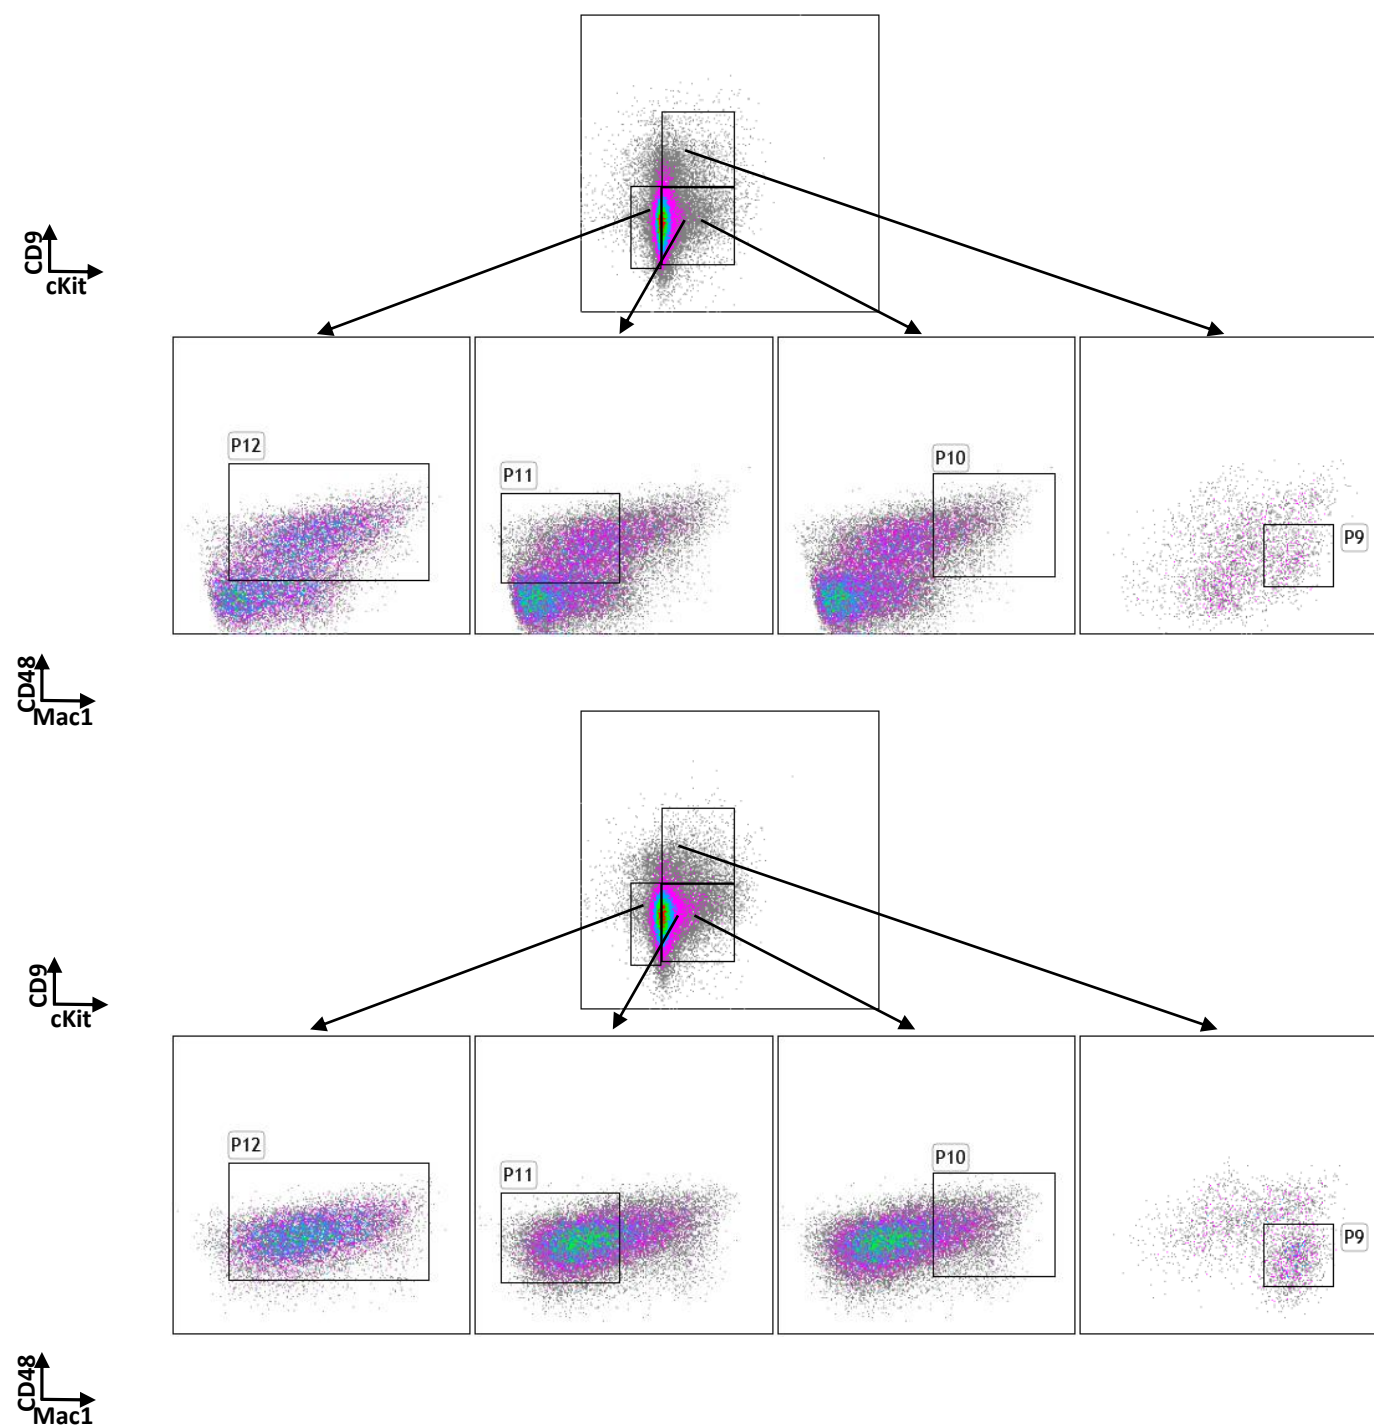

**Figure S3. Distribution of the sub- populations of ML23 in various organ**  
 The expression (from Zs+ cells) of each of the four subpopulations (P9-12) as measured by FACS analysis for cells extracted from six different tissues of ML23 leukemic mice (n=3). (a). Femur. (b). Tibia. (c). Pelvis. (d). Lymph Nodes. (e). Spleen. (f). Thymus. Cells were PRE-GATED to ZsGreen+, at least 90% in each sample (not shown).

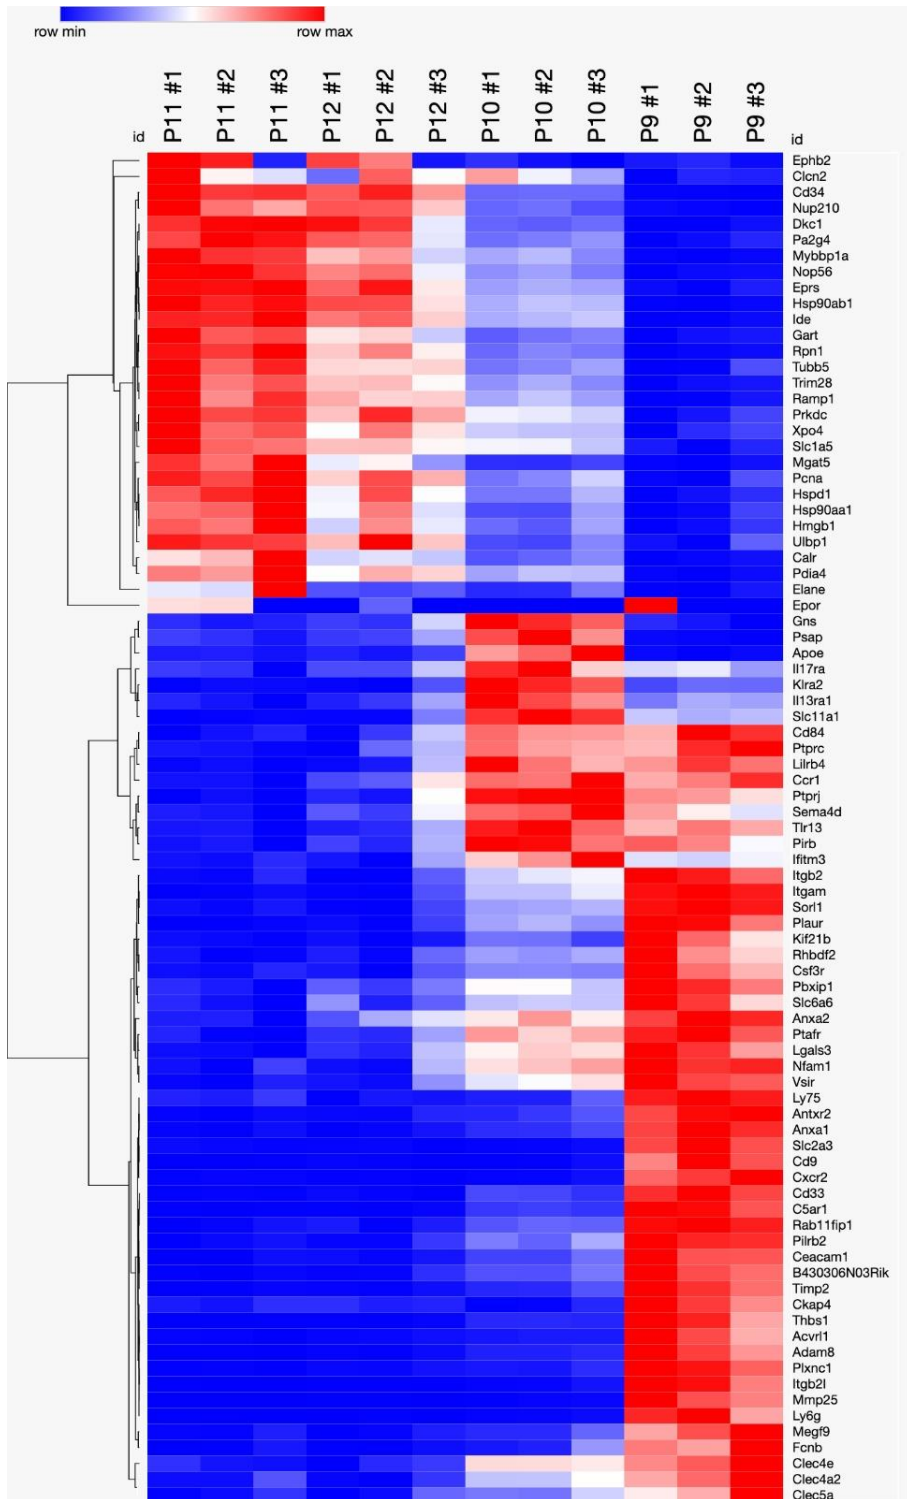

**Figure S4. LSC has a unique surface markers pattern:** The expression level of membrane protein genes was examined in the subpopulations. 85 genes were found to be enriched or suppressed .
