# Supplementary material for: Molecular Mechanisms in Murine Syngeneic Leukemia Stem Cells
Source: Cancers (Basel). 2023 Jan 24;15(3):720. doi: 10.3390/cancers15030720 (PMC9913241; doi:10.3390/cancers15030720)
Supplement: Supplementary file 1 [file cancers-15-00720-s001.zip]

Archive with 4 entries (4 files):
- Supplementary figures S1-S4 ML23 LSC 8.12.2022.pdf
- Supplementary table S1. full GSA for GEO.xlsx
- Supplementary table S2. list of 470 DE Genes.xlsx
- supplementary table S3. surface markers of LSCs .xlsx
