# Supplementary material for: Molecular Mechanisms in Murine Syngeneic Leukemia Stem Cells
Source: Cancers (Basel). 2023 Jan 24;15(3):720. doi: 10.3390/cancers15030720 (PMC9913241; doi:10.3390/cancers15030720)
Supplement: Supplementary file 1 [file cancers-15-00720-s001.zip › Supplementary table S1. full GSA for GEO.xlsx]

## Sheet: Sheet1
Table S1. Full GSA for GEO.
Chromosome	Start	Stop	Strand	Gene Symbol	gene_biotype	gene_name	gene_source	gene_version	P9 #1	P9 #2	P9 #3	P10 #1	P10 #2	P10 #3	P11 #1	P11 #2	P11 #3	P12 #1	P12 #2	P12 #3
7	45567794	45575328	-	0610005C13Rik	antisense	0610005C13Rik	havana	1	0.0001	0.110113	0.134861	0.109712	0.281692	0.503789	0.35905	0.39415	0.172605	1.65047	0.417166	0.0001
11	51685386	51688875	-	0610009B22Rik	protein_coding	0610009B22Rik	ensembl_havana	9	3.51652	2.58541	3.36756	5.48071	3.75466	4.98102	7.73202	8.50033	9.00206	5.80288	7.31567	8.10291
2	26445696	26459391	+	0610009E02Rik	processed_transcript	0610009E02Rik	havana	1	2.42517	0.846874	0.127509	0.410694	0.0001001	0.276191	0.0566631	0.136057	0.111091	0.475514	0.250824	0.000118511
11	120348678	120351191	+	0610009L18Rik	bidirectional_promoter_lncRNA	0610009L18Rik	ensembl_havana	4	0.146617	0.275133	0.280721	1.04142	0.797944	0.839581	0.773292	0.563028	0.348242	1.93436	0.450288	1.67854
11	23564961	23633640	-	0610010F05Rik	protein_coding	0610010F05Rik	ensembl_havana	15	5.42125	6.27085	9.42897	21.7581	20.8379	18.2448	24.908	29.5538	24.2208	21.2769	29.7688	25.2346
11	70235206	70237915	-	0610010K14Rik	protein_coding	0610010K14Rik	ensembl_havana	18	4.6016	9.45909	7.16837	12.9072	19.6041	17.6129	25.6065	25.4711	28.0378	21.438	19.9284	24.0286
17	87362239	87364463	-	0610012D04Rik	antisense	0610012D04Rik	havana	1	0.0001	0.0001	0.673591	0.219324	0.563284	0.0560654	0.055328	0.112686	0.298507	0.0001	0.0001	0.231609
16	31947050	31948495	-	0610012G03Rik	protein_coding	0610012G03Rik	havana	1	5.12821	2.97045	4.04104	9.20753	11.9678	14.3832	12.6473	10.6957	14.9702	13.4655	8.38486	10.3022
6	72347317	72353149	+	0610030E20Rik	protein_coding	0610030E20Rik	ensembl_havana	5	166.664	175.832	176.665	82.3487	74.9039	88.9191	89.5633	85.5086	84.4995	87.2654	96.1159	84.7903
4	107889813	107899385	+	0610037L13Rik	protein_coding	0610037L13Rik	ensembl_havana	15	7.03294	6.76591	7.96974	13.0988	14.8306	14.4951	17.8388	13.5667	13.1798	15.5486	13.2244	13.6012
8	77517056	77523899	+	0610038B21Rik	antisense	0610038B21Rik	havana	2	0.146617	1.3829	0.280721	0.164518	0.047032	0.167996	0.386696	0.170075	0.350332	0.0001	0.0001	0.0001
2	163644850	163645802	+	0610039K10Rik	antisense	0610039K10Rik	ensembl_havana	2	0.146617	0.0001	0.0001	0.219324	0.281725	0.0560654	0.386696	0.0563928	0.199038	0.372146	0.281468	0.115854
5	143329247	143332705	+	0610040B10Rik	antisense	0610040B10Rik	havana	2	0.732687	1.10023	0.224597	0.931804	0.751012	0.0560654	0.883748	0.731907	0.298507	1.04162	1.63203	0.463118
5	63812363	63899626	+	0610040J01Rik	protein_coding	0610040J01Rik	ensembl_havana	7	0.732687	0.110113	0.729715	2.57599	2.25284	2.74241	1.98831	1.91406	0.845587	2.82709	1.57576	1.38915
5	109995511	109996399	-	1010001B22Rik	lincRNA	1010001B22Rik	havana	1	0.0001	0.0001	0.0001	0.000100002	0.140896	0.0001	0.0001	0.112686	0.0995691	0.0001	0.0563735	0.289486
10	66912489	66920259	-	1110002J07Rik	lincRNA	1110002J07Rik	havana	2	0.0001	0.16512	0.280721	1.97312	0.610216	0.503789	0.55238	0.506736	0.0995691	0.669651	0.731656	0.694627
12	3403878	3427012	-	1110002L01Rik	antisense	1110002L01Rik	ensembl_havana	6	3.36202	4.33219	7.62648	2.51921	3.21003	3.21935	6.00264	7.84037	4.54899	5.80599	6.88858	5.97839
5	65405751	65406518	+	1110003F10Rik	TEC	1110003F10Rik	havana	1	0.0733587	0.550166	0.112348	0.0549061	0.328624	0.223962	0.221012	0.450443	0.149304	1.19041	0.337741	0.231609
7	116039397	116105211	+	1110004F10Rik	protein_coding	1110004F10Rik	ensembl_havana	12	12.0145	14.2192	14.958	29.3919	32.6367	33.6912	50.384	45.3398	46.9784	37.5694	46.8572	31.5486
5	115631049	115631817	-	1110006O24Rik	lincRNA	1110006O24Rik	havana	1	1.75831	0.660179	0.505218	0.219324	0.657148	0.783616	0.607608	0.619321	0.298507	0.595256	0.900477	0.173732
12	55299577	55382534	+	1110008L16Rik	protein_coding	1110008L16Rik	ensembl_havana	14	1.39202	1.16777	0.921086	8.73267	9.48957	8.89859	21.6361	17.7236	16.9685	16.5157	19.1321	12.6173
2	32377097	32381939	-	1110008P14Rik	protein_coding	1110008P14Rik	ensembl_havana	4	45.7327	37.0648	36.1461	23.0944	23.0673	33.0219	8.48921	10.8696	10.797	11.5266	8.47917	13.9367
X	70385877	70389418	+	1110012L19Rik	protein_coding	1110012L19Rik	ensembl_havana	5	0.366393	3.90557	6.56664	3.94614	6.42978	5.37278	5.5229	6.07973	9.44966	5.87727	6.41528	7.69777
15	100613173	100613844	-	1110013H19Rik	lincRNA	1110013H19Rik	havana	1	0.0001	0.220126	0.39297	0.931804	0.563284	0.335892	0.386696	0.112686	0.199038	0.0744945	0.225194	0.173732
6	13871526	14044386	+	1110019D14Rik	lincRNA	1110019D14Rik	havana	7	1.02572	1.26525	0.898088	0.602967	0.46942	0.895546	1.3808	2.25181	1.2932	1.93436	2.64496	2.25731
17	84917182	84957711	-	1110020A21Rik	bidirectional_promoter_lncRNA	1110020A21Rik	havana	2	0.0001	0.16512	0.39297	0.109712	0.093964	0.112031	0.55238	0.0563928	0.447711	0.223284	0.112647	0.0001
15	81584174	81585029	-	1110025M09Rik	TEC	1110025M09Rik	havana	1	2.78393	3.57553	3.03081	4.32978	3.52	2.40661	2.26445	2.19552	1.5916	2.45512	2.87005	2.19943
11	87701396	87705332	+	1110028F11Rik	sense_intronic	1110028F11Rik	havana	1	0.0001	0.0001	0.0001	0.0001	0.610216	0.0001	0.386696	0.7882	0.845587	0.223284	0.450288	0.289486
9	50762828	50775521	-	1110032A03Rik	protein_coding	1110032A03Rik	ensembl_havana	10	4.71119	5.16226	3.86825	7.94315	6.72514	7.17399	10.1642	10.8616	8.24892	17.1153	11.1634	8.98359
7	29155680	29156921	+	1110035H17Rik	antisense	1110035H17Rik	ensembl_havana	4	0.648443	0.333539	0.280721	0.49821	0.335384	0.318977	0.449808	1.00555	0.556252	0.422602	0.770583	0.562951
17	34950238	34952472	-	1110038B12Rik	processed_transcript	1110038B12Rik	havana	7	0.512911	0.825198	0.898088	6.248	8.35399	5.6526	22.3674	22.0106	18.0537	18.078	15.0251	8.15811
15	76948506	76950980	+	1110038F14Rik	protein_coding	1110038F14Rik	ensembl_havana	6	6.22709	5.77579	6.39826	8.44025	11.5454	11.6409	14.028	14.6362	15.3681	13.3167	12.4365	13.0804
13	33935567	33960182	+	1110046J04Rik	antisense	1110046J04Rik	havana	3	0.0001	0.0001	0.0001	0.0549061	0.0001	0.223962	0.110556	0.112686	0.149304	0.0001	0.281468	0.173732
2	91275068	91444705	-	1110051M20Rik	protein_coding	1110051M20Rik	ensembl_havana	18	1.21688	0.555202	0.0001	0.773662	1.45317	0.939887	3.68484	3.82516	2.30442	4.83578	3.05879	1.50491
19	21581202	21652977	-	1110059E24Rik	protein_coding	1110059E24Rik	ensembl_havana	9	4.54214	7.591	10.1025	10.1392	10.3721	13.096	18.2806	20.4344	22.4801	16.0693	21.3277	16.4951
9	122945089	122951001	-	1110059G10Rik	protein_coding	1110059G10Rik	ensembl_havana	7	6.22709	5.0607	6.34214	12.8247	12.8125	15.6704	11.6532	14.2985	16.2633	13.6143	16.0381	12.9646
4	124849080	124851197	-	1110065P20Rik	protein_coding	1110065P20Rik	ensembl_havana	10	0.73302	0.589463	0.201706	0.4138	0.658089	0.74641	1.83721	0.602318	2.17743	0.0001	0.137833	0.913885
11	82974316	82975586	-	1190001M18Rik	lincRNA	1190001M18Rik	havana	1	0.0001	0.16512	0.729715	0.712579	0.187828	0.559754	1.54648	1.06966	0.54718	0.669651	1.57576	0.115854
9	94517864	94538082	-	1190002N15Rik	protein_coding	1190002N15Rik	ensembl_havana	7	3.00371	2.42039	3.59205	10.5777	9.76195	13.4878	20.7106	17.282	21.5849	11.68	17.8951	15.3954
10	82619851	82623229	-	1190007I07Rik	protein_coding	1190007I07Rik	ensembl_havana	11	0.58617	0.495159	0.841964	1.3458	2.81602	3.35802	5.1363	5.01016	4.56802	4.24059	3.98763	2.0386
16	21794318	21809041	+	1300002E11Rik	lincRNA	1300002E11Rik	havana	9	4.90843	5.44575	5.05128	5.04226	4.36477	2.9103	5.85427	4.78499	4.42583	4.61256	6.8092	4.51452
12	80115863	80117200	+	1300014J16Rik	lincRNA	1300014J16Rik	havana	1	1.31876	1.26525	1.29096	0.0549061	0.23476	0.0001	0.110556	0.0001	0.149304	0.0001	0.450288	0.0001
9	103250521	103305083	-	1300017J02Rik	protein_coding	1300017J02Rik	ensembl_havana	10	0.0001	0.440153	0.0001	0.109712	0.0001	0.112031	0.0001	0.281564	0.0001	0.0001	0.112647	0.0001
4	155732545	155734728	-	1500002C15Rik	antisense	1500002C15Rik	ensembl_havana	3	2.31408	1.38407	1.98887	1.9355	3.30108	1.37914	2.31385	1.63428	1.58706	1.25652	2.04794	1.16573
7	132874739	132931198	-	1500002F19Rik	processed_transcript	1500002F19Rik	havana	2	1.8013	0.273275	0.0001	0.493296	0.391481	0.662469	0.000100001	0.0001	0.000100565	0.712384	0.0001	0.0001
3	88782943	88832548	-	1500004A13Rik	processed_transcript	1500004A13Rik	havana	7	4.78447	7.345	6.83095	15.6977	16.0126	12.2736	16.6204	18.0559	14.0071	14.6364	19.6663	19.3253
3	127714634	127717028	-	1500005C15Rik	TEC	1500005C15Rik	havana	1	1.31876	0.825199	0.561342	1.04142	0.516352	0.951512	0.82852	1.23854	0.795852	0.297678	1.23812	2.08368
5	114808196	114823469	-	1500011B03Rik	protein_coding	1500011B03Rik	ensembl_havana	8	4.39562	5.66578	4.15329	11.5642	12.2493	9.01053	16.0162	15.8747	16.7109	13.6887	14.0122	12.2701
18	61726390	61735918	+	1500015A07Rik	antisense	1500015A07Rik	havana	1	0.952463	0.550166	0.898088	1.26069	2.27442	2.01485	2.9803	2.64586	2.24104	3.49664	3.81413	2.44638
5	24985842	24998169	+	1500035N22Rik	lincRNA	1500035N22Rik	ensembl_havana	6	0.0001	0.0001	0.112348	0.109712	0.140896	0.223962	0.165784	0.506736	0.0001	0.0001	0.225194	0.520995
10	80172944	80175147	+	1600002K03Rik	protein_coding	1600002K03Rik	ensembl_havana	6	0.732687	0.440153	0.39297	2.02793	2.86295	2.18275	3.81083	2.75845	4.0286	1.85996	2.30732	2.0258
7	109998376	110151203	-	1600010M07Rik	antisense	1600010M07Rik	havana	6	4.83517	6.27085	5.7809	5.3711	3.98932	5.38589	0.662836	0.619321	0.895321	0.669651	0.731656	1.33128
17	14943184	14959571	+	1600012H06Rik	protein_coding	1600012H06Rik	ensembl_havana	9	29.4328	32.2509	33.9661	36.8349	32.4741	36.7011	23.1376	27.3063	27.1906	30.0604	29.6883	29.741
7	38183217	38197569	+	1600014C10Rik	protein_coding	1600014C10Rik	ensembl_havana	15	99.3385	107.469	121.844	85.3802	83.6638	90.61	50.6865	46.2164	62.1841	34.4925	45.0187	61.4077
6	86526247	86582467	+	1600020E01Rik	antisense	1600020E01Rik	havana	7	1.61179	2.20036	2.91856	6.79606	8.11933	4.81312	8.6709	7.99368	7.26134	7.73713	5.96509	7.92928
5	45668702	45669709	-	1600023N17Rik	TEC	1600023N17Rik	havana	1	0.58617	0.110113	0.0001	0.219324	0.047032	0.0001	0.110556	0.225271	0.0498345	0.0001	0.112647	0.0001
14	66295334	66297130	-	1700001G11Rik	processed_transcript	1700001G11Rik	havana	7	0.0001	0.0001	0.0001	0.0001	0.0001	0.0001	0.110556	0.168979	0.199038	0.0001	0.0563735	0.115854
1	33669824	33670713	+	1700001G17Rik	TEC	1700001G17Rik	ensembl_havana	1	0.0001	0.0001	0.0001	0.0549061	0.328624	0.0001	0.055328	0.168979	0.0001	0.297678	0.281468	0.0001
5	146182441	146185305	-	1700001J03Rik	protein_coding	1700001J03Rik	ensembl_havana	2	0.439652	0.220126	0.224597	0.383743	0.187828	0.0560654	0.0001	0.168979	0.149304	0.0001	0.168921	0.0001
12	110667688	110682620	-	1700001K19Rik	protein_coding	1700001K19Rik	ensembl_havana	6	0.659428	0.0001	0.336845	0.0549061	0.328624	0.0001	0.055328	0.39415	0.199038	0.0001	0.168921	0.0001
15	83353847	83367283	-	1700001L05Rik	lincRNA	1700001L05Rik	ensembl_havana	9	2.63741	2.5304	3.19918	8.44024	9.66809	5.93243	15.3535	12.7786	12.384	7.36516	9.17269	6.82961
2	30794769	30803662	-	1700001O22Rik	protein_coding	1700001O22Rik	ensembl_havana	14	0.0001	0.0001	0.0001	0.109712	0.0001	0.0001	0.441924	0.281564	0.149304	0.0744945	0.225194	0.0001
6	83156404	83162946	+	1700003E16Rik	protein_coding	1700003E16Rik	ensembl_havana	5	0.0001	0.110113	0.0001	0.164518	0.0001	0.0560654	0.331468	0.39415	0.596914	0.0001	0.281468	0.0001
2	154547085	154550004	+	1700003F12Rik	protein_coding	1700003F12Rik	ensembl_havana	10	0.0001	0.110113	0.0001	0.274131	0.187828	0.167996	0.27624	0.337857	0.298507	0.372073	0.112647	0.694627
10	120364157	120384337	+	1700006J14Rik	antisense	1700006J14Rik	ensembl_havana	15	231.644	227.617	205.695	91.6359	88.0444	95.0855	112.278	119.68	94.5456	175.424	128.697	118.07
16	31376506	31379134	-	1700007E05Rik	transcribed_processed_pseudogene	1700007E05Rik	havana	1	0.0001	0.0001	0.168473	0.131375	0.047032	0.0001	0.0596294	0.316297	0.0704789	0.0001	0.281468	0.102566
11	59725917	59740155	-	1700007J10Rik	processed_transcript	1700007J10Rik	havana	7	0.0001	0.128013	0.0001	0.626879	0.0001	0.0658314	0.0001	0.730235	0.0001	0.0001	0.192574	0.258538
16	33379854	33380728	-	1700007L15Rik	bidirectional_promoter_lncRNA	1700007L15Rik	havana	2	0.293135	0.880205	0.39297	0.657773	0.375556	0.447823	1.82262	0.900785	1.69107	0.744045	0.562835	0.810381
5	121835195	121835829	+	1700008B11Rik	antisense	1700008B11Rik	havana	1	1.31876	0.880205	0.561342	1.58948	0.93874	1.11941	0.607608	0.7882	0.149304	0.297678	1.0693	1.33128
7	127510438	127512870	-	1700008J07Rik	antisense	1700008J07Rik	havana	1	1.86885	1.00839	1.95198	1.8502	1.71576	1.24777	3.53695	3.90743	2.72762	3.9807	4.19049	2.04143
7	44360043	44385821	-	1700008O03Rik	protein_coding	1700008O03Rik	ensembl_havana	15	0.0001	0.0001	0.153132	0.376196	0.422488	0.223962	0.798045	0.924368	0.667625	3.11392	0.718914	0.0001
15	73645852	73652348	+	1700010B13Rik	processed_transcript	1700010B13Rik	havana	1	0.219876	0.770192	0.0001	0.328937	0.0001	0.0001	0.0001	0.168979	0.0001	0.0001	0.0001	0.0001
17	8988333	9011950	+	1700010I14Rik	protein_coding	1700010I14Rik	ensembl_havana	13	4.32236	2.42039	0.729715	1.47987	2.25284	1.17537	4.86016	4.27836	4.1778	3.19906	3.09515	2.48882
11	109787651	109828047	-	1700012B07Rik	protein_coding	1700012B07Rik	ensembl_havana	13	0.0001	0.16512	0.0001	0.822192	0.093964	0.615719	0.331468	0.900786	0.199038	0.223284	0.225194	0.173732
9	14756587	14771031	-	1700012B09Rik	protein_coding	1700012B09Rik	ensembl_havana	9	0.58617	1.59529	0.39297	2.19234	1.50192	3.02223	1.43603	1.74518	1.34293	1.48799	0.731656	1.85217
4	117213334	117213783	-	1700012C08Rik	processed_transcript	1700012C08Rik	havana	1	0.439652	0.0001	0.0001	0.0001	0.140896	0.0001	0.055328	0.0001	0.0001	0.0001	0.0001	0.0001
7	111083064	111122685	-	1700012D14Rik	processed_transcript	1700012D14Rik	havana	1	0.439652	0.275133	0.954212	2.13754	0.93874	1.73503	3.86606	3.20879	1.5916	0.744045	2.87005	1.56279
13	99641974	99642804	+	1700012J22Rik	TEC	1700012J22Rik	havana	1	0.0001	0.0001	0.336845	0.219324	0.0001	0.0001	0.0001	0.0001	0.0001	0.0001	0.0001	0.0001
8	120536892	120537727	-	1700016A09Rik	TEC	1700016A09Rik	havana	1	0.0001	0.275133	0.0001	0.0001	0.328624	0.112031	0.994204	0.675614	0.401037	0.0001	0.402198	0.289486
7	118740449	118741182	-	1700016B15Rik	TEC	1700016B15Rik	havana	1	0.219876	0.35296	0.0001	0.0001	0.0001	0.0001	0.055328	0.0001	0.0001	0.0001	0.0001	0.0001
11	75172560	75177634	+	1700016P03Rik	processed_transcript	1700016P03Rik	havana	1	0.858492	0.0001	0.000100001	0.00879439	0.000100001	0.000103121	0.000119261	0.539432	0.752951	0.00011799	0.000100392	0.0001
9	57253117	57262613	-	1700017B05Rik	protein_coding	1700017B05Rik	ensembl_havana	7	76.1887	52.9165	36.8737	67.2476	70.4455	53.8388	90.0211	84.89	75.1497	101.251	63.8707	59.267
19	11096816	11130877	-	1700017D01Rik	protein_coding	1700017D01Rik	ensembl_havana	7	0.0001	0.16512	0.0001	0.767386	0.610216	0.671685	0.055328	0.0563928	0.0001	0.0001	0.0563735	0.173732
3	40504867	40522913	-	1700017G19Rik	lincRNA	1700017G19Rik	ensembl_havana	6	0.0733587	0.550166	0.0001	0.274131	0.0001	0.0001	0.0001	0.112686	0.0001	0.0001	0.0563735	0.0001
6	126822377	126825178	+	1700018A23Rik	antisense	1700018A23Rik	havana	1	0.0001	0.177283	0.0001	0.126912	0.311509	0.0001	0.061494	0.0001	0.0530014	0.0001	0.0001	0.0001
1	52922324	53020180	-	1700019D03Rik	protein_coding	1700019D03Rik	ensembl_havana	12	0.0733587	0.330139	0.168473	0.0001	0.093964	0.284272	0.0881182	0.254533	0.504678	0.107666	0.596888	0.111808
9	14089620	14118302	+	1700019J19Rik	lincRNA	1700019J19Rik	havana	1	0.0001	0.0001	0.0001	0.164518	0.0001	0.0001	0.0001	0.112686	0.0498345	0.0744945	0.112647	0.115854
2	130405259	130406075	+	1700020A23Rik	protein_coding	1700020A23Rik	ensembl_havana	5	0.0001	0.0001	0.0001	0.0618693	0.0001	0.0001	0.106141	0.0001	0.0001	0.297678	0.16892	0.0001
19	5502767	5503788	-	1700020D05Rik	protein_coding	1700020D05Rik	havana	1	0.0001	0.440153	1.01034	1.42506	0.70408	2.18275	1.49126	1.85776	0.945056	0.520862	0.844203	2.25731
2	119594297	119607503	+	1700020I14Rik	lincRNA	1700020I14Rik	havana	1	168.275	242.359	261.428	204.536	171.209	211.55	243.722	255.346	260.309	199.154	280.02	203.843
11	83437677	83441234	+	1700020L24Rik	protein_coding	1700020L24Rik	ensembl_havana	5	16.1794	14.3256	20.2863	7.54	10.3352	20.1299	16.565	13.1265	29.1588	7.87374	7.47668	9.45735
1	91404879	91406030	-	1700020N18Rik	lincRNA	1700020N18Rik	havana	1	0.146617	0.275133	0.0001	0.0001	0.047032	0.0001	0.221012	0.0001	0.0001	0.0001	0.0563735	0.0001
10	21419358	21426566	+	1700021A07Rik	lincRNA	1700021A07Rik	ensembl_havana	5	0.952463	0.275133	0.0001	0.438549	0.610216	0.112031	1.15989	1.12596	0.497445	0.148889	0.731656	0.578872
10	43525133	43540995	-	1700021F05Rik	protein_coding	1700021F05Rik	ensembl_havana	11	2.71067	2.42039	1.45933	4.76823	4.50557	5.14892	5.13631	6.86783	7.95762	6.24924	6.13392	6.3666
4	117002166	117003013	-	1700021J08Rik	antisense	1700021J08Rik	havana	1	0.232409	0.7587	0.897516	1.24639	1.92812	0.407231	0.0824097	1.05488	0.5911	0.0001	0.680619	0.745344
4	42969604	42983641	+	1700022I11Rik	protein_coding	1700022I11Rik	ensembl_havana	12	0.146617	0.0551066	0.490239	0.166445	0.047032	0.282083	0.0798433	0.155596	0.296384	0.0976585	0.255211	0.0876872
17	25985815	25988470	+	1700022N22Rik	lincRNA	1700022N22Rik	ensembl	1	0.0001	0.0001	0.0001	0.219324	0.140896	0.391858	0.110556	0.112686	0.447711	0.297678	0.168921	0.347363
1	151852403	152090126	-	1700025G04Rik	protein_coding	1700025G04Rik	ensembl_havana	16	0.659428	1.21024	4.32167	3.67211	4.13012	8.28298	11.5428	9.34472	14.1247	11.6057	13.9559	12.467
6	39063878	39067599	-	1700025N23Rik	antisense	1700025N23Rik	havana	1	0.0001	0.0551066	0.0001	0.219324	0.047032	0.0001	0.0001	0.0001	0.0001	0.0001	0.0563735	0.173732
8	70948246	71085759	-	1700026F02Rik	lincRNA	1700026F02Rik	ensembl_havana	2	0.0001	0.0001	0.0001	0.00290915	0.0001	0.000104656	0.0001	0.0314726	0.00105974	0.0001	0.58735	0.00371608
15	78911966	78913661	-	1700027A07Rik	antisense	1700027A07Rik	havana	1	1.05488	1.61804	0.318612	0.276454	0.346512	3.61231	0.197682	1.46718	0.511487	6.88816	0.934556	1.45707
10	43745809	43765837	+	1700027J07Rik	lincRNA	1700027J07Rik	havana	1	0.952463	0.770192	0.841964	0.0549061	0.0001	0.0001	0.165784	0.112686	0.0001	0.148889	0.225194	0.0001
5	151368675	151432119	+	1700028E10Rik	processed_transcript	1700028E10Rik	havana	5	1.46527	1.48528	0.673591	0.876998	1.73658	0.895546	1.82262	1.18225	0.447711	1.4136	1.63203	0.463118
7	44229930	44236123	-	1700028J19Rik	protein_coding	1700028J19Rik	ensembl_havana	6	0.512911	0.385146	0.673591	0.835339	1.12647	0.895547	0.718064	0.731907	0.696383	0.967229	1.29439	1.15764
5	107534709	107551543	+	1700028K03Rik	protein_coding	1700028K03Rik	ensembl_havana	9	0.0001	0.0551066	0.224608	0.0173432	0.122336	0.0101832	0.0641273	0.212825	0.181819	0.468704	0.361084	0.231935
11	103264860	103267746	-	1700028N14Rik	processed_transcript	1700028N14Rik	havana	3	0.0001	0.330139	0.224597	0.164518	0.093964	0.223962	0.221012	0.168979	0.0001	0.0001	0.112647	0.63675
2	92382538	92385709	+	1700029I15Rik	protein_coding	1700029I15Rik	ensembl_havana	10	0.0001	0.440153	0.280721	0.274131	0.281692	0.615719	0.0001	0.281564	0.298507	0.223284	0.394015	0.115854
8	45953606	45975253	-	1700029J07Rik	protein_coding	1700029J07Rik	ensembl_havana	9	0.366393	0.0001	0.0001	0.109712	0.328624	0.0001	0.55238	0.619321	1.09426	0.520862	0.731656	0.694627
13	44439712	44469031	+	1700029N11Rik	lincRNA	1700029N11Rik	havana	8	0.0001	0.275133	0.0001	0.0001	0.0001	0.112031	0.0001	0.0001	0.0498345	0.223284	0.0001	0.0001
15	81980540	81981564	+	1700029P11Rik	protein_coding	1700029P11Rik	ensembl_havana	3	0.0001	0.0001	0.0001	0.0001	0.0001	0.112031	0.221012	0.0001	0.895322	0.0001	0.0563735	0.405241
12	20804381	20815780	-	1700030C10Rik	processed_transcript | transcribed_unprocessed_pseudogene	1700030C10Rik	ensembl_havana | havana	1 | 2	2.05959	2.67121	3.28458	5.13418	5.72646	2.50922	8.86378	7.96742	5.26696	8.14016	7.98194	4.61186
8	116969594	116978960	-	1700030J22Rik	protein_coding	1700030J22Rik	ensembl_havana	8	0.219876	0.0551066	0.0001	1.86351	1.97124	0.895546	0.497152	0.675614	0.497445	0.223284	0.844203	1.38915
8	72443880	72461002	+	1700030K09Rik	protein_coding	1700030K09Rik	ensembl_havana	13	0.956023	2.7509	3.10219	5.02586	4.31245	8.13661	10.5946	9.98997	8.15919	11.2436	9.40273	8.43419
1	191886130	191907528	-	1700034H15Rik	antisense	1700034H15Rik	ensembl_havana	14	3.50574	1.45715	1.38373	0.855365	0.477825	0.0001	0.348633	0.461648	0.0001	0.311639	0.182459	0.059097
3	40900196	40902544	-	1700034I23Rik	protein_coding	1700034I23Rik	ensembl_havana	5	0.0001	1.15524	0.449094	1.37025	0.754075	0.391858	0.1366	0.556629	0.0001	0.744045	0.675363	0.0001
1	9747648	9791925	+	1700034P13Rik	antisense	1700034P13Rik	havana	8	0.000100115	0.0001	0.0001	0.0001	0.093964	0.132802	0.165784	0.506869	0.149304	0.297678	0.281473	0.0001
16	3895179	3908690	-	1700037C18Rik	protein_coding	1700037C18Rik	ensembl_havana	15	1.69666	3.77456	1.64971	2.928	2.86891	4.10355	3.09963	4.69644	3.18118	1.70774	3.18577	3.20611
2	131146324	131160082	-	1700037H04Rik	protein_coding	1700037H04Rik	ensembl_havana	16	13.6262	13.3667	15.2659	13.4824	17.7404	15.9502	23.6929	17.845	25.0664	18.0036	14.1248	18.8102
8	22805766	22809538	+	1700041G16Rik	lincRNA	1700041G16Rik	ensembl_havana	5	0.0001	0.110113	0.168473	0.0001	0.422488	0.279927	0.055328	0.281564	0.0001	0.297678	0.0563735	0.0001
12	55199592	55217169	+	1700047I17Rik2	protein_coding	1700047I17Rik2	ensembl_havana	2	28.9794	31.0737	33.5247	18.7166	21.064	30.7254	17.0945	18.3383	19.2775	22.8218	22.3239	20.4754
11	58322988	58324440	+	1700047K16Rik	processed_transcript	1700047K16Rik	havana	1	0.0001	0.0001	0.168473	0.493355	0.46942	0.335892	0.294224	0.450443	0.0995691	0.372073	0.337741	0.405241
1	182287990	182303326	+	1700047M11Rik	lincRNA	1700047M11Rik	havana	2	81.7566	90.6508	92.3806	2.41157	2.39363	6.49209	0.331468	0.112686	0.199038	0.0001	0.281468	0.405241
1	10057025	10057945	-	1700047N06Rik	TEC	1700047N06Rik	havana	1	0.0001	0.0001	0.0562242	0.0001	0.0001	0.0001	0.165784	0.112686	0.0001	0.223284	0.112647	0.0001
16	92308716	92312469	-	1700048M11Rik	antisense	1700048M11Rik	havana	2	0.0001	0.0001	0.112348	0.109712	0.281692	0.335892	0.165784	0.168979	0.397976	0.520862	0.168921	0.0001
6	134245671	134246367	-	1700051K13Rik	TEC	1700051K13Rik	havana	1	0.0001	0.0551066	0.0001	0.0001	0.047032	0.0560654	0.221012	0.39415	0.0001	0.595256	0.394015	0.347363
11	105177726	105181434	-	1700052K11Rik	antisense	1700052K11Rik	havana	1	1.17224	3.03895	2.67619	2.00555	2.9066	2.57451	4.13088	5.43585	2.71937	3.90767	4.85169	3.41308
4	45011687	45015407	+	1700055D18Rik	antisense	1700055D18Rik	ensembl_havana	4	0.0001	0.0001	0.0001	0.16846	0.422488	0.223962	1.0171	0.511637	0.199038	0.950788	0.450288	0.0579772
1	184033030	184034302	-	1700056E22Rik	protein_coding	1700056E22Rik	ensembl_havana	7	0.366393	0.220126	0.0001	0.383743	0.23476	0.0001	0.718064	0.337857	0.348242	0.297678	0.281468	0.0579772
16	17047520	17049112	+	1700056N10Rik	lincRNA	1700056N10Rik	havana	1	0.366393	0.770192	0.280721	0.438549	0.797944	0.0560654	0.82852	1.06966	0.199038	1.04162	1.01302	0.810381
7	19258492	19259740	+	1700058P15Rik	antisense	1700058P15Rik	havana	1	2.1246	1.87032	2.02057	0.822192	0.751012	0.0001	0.27624	0.225271	0.0995691	0.669651	0.168921	0.115854
4	53562983	53564698	-	1700060J05Rik	antisense	1700060J05Rik	havana	1	0.258909	0.823744	0.280721	0.331675	0.206976	0.0560654	0.277589	0.171982	0.0001	0.0001	0.225912	0.115854
17	56875477	56888905	+	1700061G19Rik	protein_coding	1700061G19Rik	ensembl_havana	9	0.439652	0.220126	0.0562242	0.328937	0.657148	0.223962	0.110556	0.39415	0.199038	0.520862	0.506562	0.405241
9	41192446	41217991	+	1700063D05Rik	lincRNA	1700063D05Rik	havana	7	1.31876	0.715185	3.08693	2.41157	2.01818	2.57451	4.91539	4.84128	6.31638	6.17484	4.72708	4.45664
9	95855418	95858323	-	1700065D16Rik	antisense	1700065D16Rik	ensembl_havana	2	0.146617	0.0001	0.0001	0.0001	0.047032	0.0001	0.055328	0.0001	0.137774	0.0001	0.337741	0.225462
18	35703225	35730870	+	1700066B19Rik	protein_coding	1700066B19Rik	ensembl_havana	3	0.0001	0.0551066	0.0562242	0.0001	0.047032	0.279927	0.110556	0.337857	0.497445	0.0001	0.0563735	0.231609
1	57377620	57385424	+	1700066M21Rik	protein_coding	1700066M21Rik	ensembl_havana	3	2.84838	4.73066	5.78428	11.4546	9.43343	9.85001	15.7401	14.4674	15.1194	10.7873	18.2327	15.4533
8	84001502	84004771	+	1700067K01Rik	protein_coding	1700067K01Rik	ensembl_havana	13	0.0001	0.0001	0.280721	0.0001	0.23476	0.391858	0.883748	0.225271	0.248773	0.223284	0.168921	0.0001
7	121707075	121708014	+	1700069B07Rik	antisense	1700069B07Rik	ensembl_havana	3	0.0001	0.0001	0.168473	0.0001	0.0001	0.279927	0.0001	0.0001	0.54718	0.0001	0.0001	0.115911
17	43588340	43592443	-	1700071M16Rik	antisense	1700071M16Rik	havana	7	3.25662	5.35012	3.47037	6.58833	3.71643	3.97859	0.178035	0.0588757	0.217921	0.0001	0.314161	2.05154
4	127531622	127532886	+	1700080G11Rik	lincRNA	1700080G11Rik	havana	1	0.0001	0.0001	0.0001	0.164518	0.328624	0.0560654	0.331468	0.337857	0.696383	0.0001	0.450288	0.463118
9	21091755	21128394	+	1700084C06Rik	antisense	1700084C06Rik	ensembl_havana	1	0.419992	0.0001	0.120993	0.18345	0.63062	0.432577	0.328446	0.698347	0.000265474	0.740256	0.924663	0.0171248
2	30236795	30238224	-	1700084E18Rik	antisense	1700084E18Rik	ensembl_havana	4	0.0001	0.16512	0.112348	0.0549061	0.093964	0.167996	0.221012	0.112686	0.0995691	0.148889	0.225194	0.578872
15	33403985	33405977	-	1700084J12Rik	transcribed_processed_pseudogene	1700084J12Rik	havana	3	0.0001	0.0001	0.0001	0.556524	0.145859	0.29548	0.225429	0.282451	0.0001	0.149845	0.173304	0.117542
18	38238405	38250566	-	1700086O06Rik	lincRNA	1700086O06Rik	ensembl	7	0.0733587	0.16512	0.224597	0.274131	0.46942	0.167996	0.883748	0.844493	0.348242	0.892835	0.844203	0.463118
15	79129349	79141254	-	1700088E04Rik	protein_coding	1700088E04Rik	ensembl_havana	12	0.0031072	0.000950326	0.0653771	0.292857	0.115244	0.000110446	0.494731	0.702695	0.0677446	0.0001	0.38949	0.000710021
10	84498874	84499627	+	1700092E16Rik	TEC	1700092E16Rik	havana	1	0.659428	0.935212	0.785839	0.0549061	0.047032	0.0001	0.0001	0.0001	0.0001	0.0001	0.0563735	0.0001
19	8740718	8741226	+	1700092M07Rik	protein_coding	1700092M07Rik	ensembl_havana	2	0.0001	0.0551066	0.0001	0.0549061	0.0883074	0.0560654	0.271695	0.449866	0.447711	0.446329	0.198721	0.0579772
11	23516203	23521156	-	1700093K21Rik	protein_coding	1700093K21Rik	ensembl_havana	12	0.0001	0.0551066	0.0001	0.383743	0.140896	0.0001	0.0001	0.112686	0.0001	0.223284	0.0001	0.0001
5	112793292	112801702	+	1700095B10Rik	antisense	1700095B10Rik	havana	7	0.0001	0.0001	0.0001	0.0001	0.0001	0.189544	0.0001	0.288676	0.064835	0.313677	0.0001	0.0001
4	138137595	138138519	-	1700095J12Rik	antisense	1700095J12Rik	havana	1	0.0001	0.0001	0.336845	0.109712	0.047032	0.0001	0.110556	0.0563928	0.149304	0.0001	0.0563735	0.0001
5	25530013	25531467	+	1700096K18Rik	lincRNA	1700096K18Rik	havana	1	6.15383	6.10583	3.87267	3.06924	3.19147	2.79837	2.92718	4.33465	3.18311	6.54682	3.60161	1.85217
6	81893818	81895340	-	1700097M23Rik	TEC	1700097M23Rik	havana	1	0.0733587	0.0001	0.0562242	0.0001	0.23476	0.0001	0.165784	0.0001	0.0001	0.0001	0.0563735	0.0579772
17	30622441	30626906	-	1700097N02Rik	antisense	1700097N02Rik	havana	1	0.0001	0.439628	0.171838	0.174684	0.385111	0.723139	0.3374	0.62886	1.03659	1.19041	0.844203	0.534038
13	102760255	102761897	+	1700099I09Rik	antisense	1700099I09Rik	havana	2	0.0001	0.0001	0.0001	0.328937	0.422488	0.0001	0.0001	0.112686	0.0001	0.212033	0.394015	0.347363
6	129531950	129533818	-	1700101I11Rik	processed_transcript	1700101I11Rik	havana	2	0.0001	0.0001	0.0605453	0.388978	0.0001	0.0001	0.110556	0.0592771	0.0001	0.372073	0.112647	0.0579772
9	108392805	108410935	+	1700102P08Rik	protein_coding	1700102P08Rik	ensembl_havana	9	0.146617	0.275133	0.954212	0.0549061	0.563284	0.951512	0.165784	0.619321	0.397976	0.297678	0.450288	0.347363
19	7382537	7384309	+	1700105P06Rik	antisense	1700105P06Rik	havana	1	0.0001	0.0647986	0.112348	0.17376	0.0509183	0.0001	0.226501	0.0634098	0.0001	0.0001	0.180154	0.121742
14	61292980	61318147	-	1700109G14Rik	antisense	1700109G14Rik	havana	1	0.0001	0.121112	0.225044	0.233938	0.659484	0.0611956	0.118473	0.175741	0.0001	0.0001	0.119214	0.0001
5	3571566	3584357	+	1700109H08Rik	protein_coding	1700109H08Rik	ensembl_havana	11	5.81795	4.1739	3.5665	5.33233	5.16691	5.54754	8.00594	8.52705	6.29663	9.04796	11.1596	4.52237
17	10324602	10329308	+	1700110C19Rik	lincRNA	1700110C19Rik	havana	6	0.0001	0.0001	0.0001	0.328937	0.46942	0.335892	0.110556	0.0563928	0.0498345	0.0001	0.168921	0.405241
9	40323426	40343565	+	1700110K17Rik	antisense	1700110K17Rik	havana	8	0.366393	0.16512	0.561342	0.0549061	0.047032	0.0560656	0.055328	0.0585427	0.0001	0.0001	0.0001	0.173732
3	88171556	88177786	-	1700113A16Rik	antisense	1700113A16Rik	havana	5	0.000100012	0.600168	0.000100005	0.660135	1.04662	1.34666	0.876294	1.74171	0.615817	3.23277	0.579517	1.05055
15	99249511	99262045	+	1700120C14Rik	processed_transcript	1700120C14Rik	havana	2	0.659428	0.440153	0.0001	0.164518	0.140896	0.447823	0.221012	0.168979	0.0498345	0.0744945	0.337741	0.231609
8	84847188	84848416	+	1700122E12Rik	processed_transcript	1700122E12Rik	havana	1	0.0001	0.110113	0.224597	0.109712	0.047032	0.0001	0.221012	0.168979	0.348242	0.0001	0.0563735	0.0001
7	126224247	126248239	-	1700123J17Rik	lincRNA	1700123J17Rik	havana	1	0.0001	0.0001	0.0001	0.0001	0.0001	0.167996	0.055328	0.0001	0.199038	0.0744945	0.0563735	0.0001
4	11966565	11994281	+	1700123M08Rik	processed_transcript	1700123M08Rik	havana	1	0.0001	0.110113	0.0001	0.309478	0.140896	0.167996	0.5769	0.335846	0.277609	0.297678	0.225194	0.347363
14	54686216	54690742	+	1700123O20Rik	protein_coding	1700123O20Rik	ensembl_havana	7	20.2674	23.4825	27.1874	17.4633	15.8393	28.2364	20.1363	14.903	27.4398	13.53	18.3207	21.176
6	83761756	83762866	-	1700124L16Rik	antisense	1700124L16Rik	havana	6	0.0001	0.0001	0.111912	0.19761	0.047032	0.0001	0.27624	0.563028	0.0001	0.669651	0.337741	0.0001
6	143201397	143221449	-	1700126G02Rik	antisense	1700126G02Rik	havana	1	0.0001	0.561671	0.666826	0.632206	0.571101	0.715316	0.810107	0.861906	0.0601601	1.40066	0.520281	0.994547
1	98131456	98144656	+	1810006J02Rik	lincRNA	1810006J02Rik	havana	6	3.58978	2.36538	5.94927	0.109712	0.328624	1.00748	0.110556	0.506736	1.2932	0.0001	0.394015	0.115854
7	65803111	65806450	+	1810008I18Rik	lincRNA	1810008I18Rik	havana	1	0.879204	0.770192	0.785839	0.822192	1.73658	0.951512	1.3808	2.13923	2.28789	0.669651	0.450288	0.115854
19	8888853	8890882	+	1810009A15Rik	protein_coding	1810009A15Rik	ensembl_havana	9	0.693503	0.51977	3.60074	3.27527	3.0883	8.01101	6.18395	4.62587	10.8189	1.73091	3.51147	5.80769
7	145205825	145208120	-	1810010D01Rik	protein_coding	1810010D01Rik	havana	1	2.78393	0.605172	0.280721	0.219324	0.093964	0.0560654	0.055328	0.0001	0.0001	0.0744945	0.0563735	0.0001
11	107025681	107030444	+	1810010H24Rik	protein_coding	1810010H24Rik	ensembl_havana	5	1.46527	0.385146	0.0001	1.20583	0.891808	0.279927	0.607608	0.675614	0.994791	0.744045	0.619109	0.405241
2	26138546	26139544	+	1810012K08Rik	lincRNA	1810012K08Rik	havana	1	0.0001	0.268829	0.0973093	0.946258	1.18039	0.581446	1.89448	2.21172	0.335813	1.24496	0.840424	0.724605
16	8830100	8858923	+	1810013L24Rik	protein_coding	1810013L24Rik	ensembl_havana	6	58.6803	63.3127	65.4971	51.5726	56.1776	49.9213	38.494	37.0971	35.5603	40.1731	42.5992	43.7553
10	86685525	86694807	+	1810014B01Rik	transcribed_unprocessed_pseudogene	1810014B01Rik	havana	2	0.162555	2.60073	3.08066	5.57572	4.63862	4.76343	13.05	13.4706	15.5386	9.00913	11.4797	7.84651
7	12948592	12961769	-	1810019N24Rik	lincRNA	1810019N24Rik	havana	2	0.0001	0.0001	0.0001	0.0001	0.23476	0.112031	0.27624	0.225271	0.149304	0.297678	0.0001	0.0001
15	89071196	89075853	-	1810021B22Rik	antisense	1810021B22Rik	havana	8	0.366393	0.605172	1.01034	0.438549	0.610216	0.167996	0.55238	0.225271	0.49375	0.744045	0.335805	0.0579772
3	14606284	14611286	-	1810022K09Rik	protein_coding	1810022K09Rik	ensembl_havana	8	2.42106	3.91315	2.84299	11.8959	9.64104	11.2553	12.2242	13.5936	17.7094	8.67768	14.8336	10.3234
2	127186355	127208281	-	1810024B03Rik	protein_coding	1810024B03Rik	ensembl_havana	2	0.0001	0.0001	0.0001	0.548161	0.375556	1.17537	0.82852	1.01337	1.39267	0.669651	0.95675	1.38915
7	73539203	73558396	-	1810026B05Rik	processed_transcript	1810026B05Rik	havana	6	37.121	56.9737	83.7507	42.4491	34.1003	57.2955	33.5767	35.6536	40.5676	36.2487	38.3865	52.9374
X	12654879	12673669	-	1810030O07Rik	protein_coding	1810030O07Rik	ensembl_havana	6	25.1278	21.6727	22.0008	38.748	43.553	40.1833	49.5396	45.9351	49.1875	38.3877	54.698	49.4273
11	116671660	116675800	+	1810032O08Rik	protein_coding	1810032O08Rik	ensembl_havana	17	0.0001	0.715185	0.898088	3.61214	4.22398	2.35065	10.2037	7.03671	5.76931	2.82615	7.82212	3.58849
13	64248700	64271853	+	1810034E14Rik	antisense	1810034E14Rik	havana	3	0.439652	1.10023	0.39297	4.4394	3.14454	3.13416	2.26445	2.13923	2.03922	3.57104	3.26397	4.16726
3	122924203	122926185	+	1810037I17Rik	protein_coding	1810037I17Rik	ensembl_havana	9	24.9081	24.9181	28.1183	11.2902	14.4552	28.9902	16.7342	20.941	30.8355	23.5088	14.6875	18.3472
14	121876725	121879410	-	1810041H14Rik	antisense	1810041H14Rik	havana	1	0.0001	0.16512	0.0001	0.219324	0.140896	0.0001	0.386696	0.0001	0.0001	0.148889	0.112647	0.0001
10	77978524	77986906	+	1810043G02Rik	protein_coding	1810043G02Rik	ensembl_havana	16	13.0402	11.2764	8.08199	23.9504	22.0581	13.9355	19.7165	17.5072	14.2242	16.1437	13.562	18.8681
6	91440987	91441756	+	1810044D09Rik	lincRNA	1810044D09Rik	havana	1	0.0001	0.770192	0.0001	0.548161	0.985672	0.447823	1.60171	0.563028	0.895322	0.967229	0.450288	0.694627
19	3708333	3717882	+	1810055G02Rik	protein_coding	1810055G02Rik	ensembl	1	67.5446	57.427	55.7315	4.71343	6.14819	13.6557	7.23497	9.00696	12.1353	10.3409	7.09057	7.75565
6	35252654	35263497	+	1810058I24Rik	lincRNA	1810058I24Rik	ensembl_havana	12	22.7835	23.6529	28.1745	20.4976	24.6864	29.1581	22.8645	20.8285	22.9774	25.6663	21.4966	22.225
5	148953748	148970123	-	1810059H22Rik	processed_transcript	1810059H22Rik	havana	2	0.0733587	0.0551066	0.0562242	1.39279	0.938899	1.17537	6.44294	4.82124	4.22754	4.68696	6.69665	1.84158
3	36475937	36482300	+	1810062G17Rik	protein_coding	1810062G17Rik	ensembl_havana	6	0.0001	0.0001	0.280721	0.219324	0.140896	0.0001	0.055328	0.0563928	0.199038	0.223284	0.168921	0.0001
14	20546079	20570688	+	1810062O18Rik	antisense	1810062O18Rik	havana	8	0.439652	0.0001	0.224597	0.294002	0.136765	0.0001	0.123943	0.182062	0.0001	0.148889	0.482198	0.190855
11	57795499	57801418	-	2010001A14Rik	processed_transcript	2010001A14Rik	havana	7	0.0001	0.220126	0.0001	0.712579	0.657148	0.783616	0.773292	0.619321	1.04453	1.26481	0.337741	0.520995
13	46979908	47011196	+	2010001K21Rik	processed_transcript	2010001K21Rik	ensembl_havana	5	0.0001	0.0001	0.0001	0.0553218	0.14413	0.10065	0.170926	0.202103	0.14979	0.0001	0.0001	0.0001
16	36221468	36257445	+	2010005H15Rik	protein_coding	2010005H15Rik	ensembl_havana	7	0.397101	1.67731	1.54157	0.0001	0.0001	0.0001	0.0001	0.0001	0.0001	0.0001	0.00982394	0.115854
6	125083437	125084030	+	2010008C14Rik	TEC	2010008C14Rik	havana	1	0.0001	0.0001	0.224597	2.57599	3.33227	3.69382	1.54648	2.30811	1.74081	3.27346	1.85713	4.22514
2	158070367	158091798	-	2010009K17Rik	antisense	2010009K17Rik	havana	1	0.0001	0.0001	0.39297	0.0001	0.0001	0.0001	0.055328	0.112686	0.199038	0.0001	0.225194	0.0579772
6	145303152	145308952	+	2010013B24Rik	lincRNA	2010013B24Rik	havana	1	0.0001	0.440153	0.39297	0.0549061	0.422488	0.0001	0.441924	0.39415	0.248773	0.0001	0.337741	0.115854
11	88039578	88047361	-	2010015M23Rik	lincRNA	2010015M23Rik	ensembl	1	0.0001	0.0001	0.0001	0.493355	0.375556	0.0001	0.994204	0.844493	0.497445	0.0744945	0.394015	0.115854
3	106481982	106485914	-	2010016I18Rik	processed_transcript	2010016I18Rik	ensembl_havana	2	28.2016	21.6668	20.4923	54.1009	55.3395	19.3643	8.82999	10.468	5.77032	10.1037	6.70096	16.3537
1	185312187	185313804	+	2010103J01Rik	antisense	2010103J01Rik	havana	1	0.0001	0.0001	0.0562242	0.152373	0.187822	0.549436	0.221012	0.474918	0.279757	0.0001	0.562835	0.173732
15	74876987	74897022	-	2010109I03Rik	protein_coding	2010109I03Rik	ensembl_havana	5	0.0001	0.0001	0.0001	0.602967	0.093964	0.0001	0.055328	0.112686	0.0995691	0.0744945	0.0001	0.173732
18	34751809	34758686	+	2010110K18Rik	lincRNA	2010110K18Rik	ensembl	1	2.19786	2.64042	2.02057	1.26064	1.0326	2.40661	3.92129	5.91085	4.62541	3.34785	4.33316	2.31519
13	62964893	63326097	+	2010111I01Rik	protein_coding	2010111I01Rik	ensembl_havana	17	2.78393	3.68554	2.02057	11.345	10.8151	10.7455	22.7377	16.4141	14.1853	19.6486	21.7384	14.643
6	42370671	42381216	+	2010310C07Rik	antisense	2010310C07Rik	havana	6	0.219876	0.770192	0.785839	0.0001	0.093964	0.167996	0.110556	0.225271	0.149304	0.297678	0.394015	0.0001
9	124291804	124312697	-	2010315B03Rik	protein_coding	2010315B03Rik	ensembl_havana	10	6.37361	5.8858	9.14835	13.8112	13.0941	11.0812	12.6473	12.2607	7.65922	12.5728	15.813	11.5177
8	70776815	70777824	+	2010320M18Rik	lincRNA	2010320M18Rik	havana	1	0.0001	0.550166	0.280721	1.37025	1.97124	0.839581	2.43013	2.81474	1.84028	3.42225	1.96967	1.09977
7	29246561	29248467	-	2200002D01Rik	protein_coding	2200002D01Rik	ensembl_havana	5	0.516375	0.137755	0.0001	0.0679001	0.0001	0.0001	0.071364	0.0563928	0.0995691	0.0001	0.0001	0.0001
7	30698926	30700537	+	2200002J24Rik	protein_coding	2200002J24Rik	ensembl_havana	8	0.0001	0.0001	0.0001	0.0549061	0.0001	0.167996	0.165784	0.281564	0.298507	0.372073	0.0563735	0.115854
11	77489854	77491410	+	2210008F06Rik	lincRNA	2210008F06Rik	ensembl	1	0.0001	0.0001	0.0001	0.98661	0.140896	0.112031	0.110556	0.225271	0.348242	0.223284	0.506562	0.0579772
6	41030268	41035510	-	2210010C04Rik	protein_coding	2210010C04Rik	ensembl_havana	5	0.0001	0.0001	0.0001	0.328937	0.047032	0.167996	0.27624	0.112686	0.199038	0.0001	0.112647	0.0001
13	58379817	58385226	-	2210016F16Rik	protein_coding	2210016F16Rik	ensembl_havana	6	4.83517	4.89568	6.11764	19.3467	19.9931	21.3229	28.8844	25.0504	21.187	23.8064	22.3407	23.0352
5	114942158	114949784	+	2210016L21Rik	protein_coding	2210016L21Rik	ensembl_havana	15	4.83517	3.46551	4.88291	10.6325	10.7006	8.28298	17.0656	18.1245	15.2686	13.9119	16.2069	12.8488
7	121062852	121063960	-	2210406H18Rik	TEC	2210406H18Rik	havana	1	21.7579	21.0126	23.0672	15.8939	14.5021	20.7073	5.9095	7.71222	13.7268	5.87727	6.19019	10.2444
6	31220351	31337405	+	2210408F21Rik	processed_transcript	2210408F21Rik	havana	7	0.0001	0.0001	0.112348	0.548161	0.46942	0.223962	0.0001	0.0001	0.0001	0.0001	0.0001	0.0579772
13	77135540	77613785	+	2210408I21Rik	protein_coding	2210408I21Rik	ensembl_havana	6	0.58617	0.16512	0.0001	0.548161	1.3142	0.783616	1.27034	2.19552	1.19373	2.23194	2.02595	0.926136
1	180952064	180958150	-	2210411M09Rik	antisense	2210411M09Rik	havana	2	0.226747	0.333563	0.356731	0.843118	0.618001	0.861344	0.633953	0.29861	0.615815	0.235428	0.351156	0.420784
5	130131327	130131825	+	2210412B16Rik	TEC	2210412B16Rik	havana	1	0.0001	0.0001	0.0562242	0.328937	0.328624	0.503789	0.110556	0.731907	0.199038	0.148889	0.337741	0.173732
5	148741840	148743140	+	2210417A02Rik	lincRNA	2210417A02Rik	havana	1	1.53853	0.605172	0.729715	0.383743	0.187828	0.559754	0.27624	0.450443	0.696383	0.297678	0.450288	0.63675
2	176226569	176240329	+	2210418O10Rik	protein_coding	2210418O10Rik	ensembl_havana	9	0.0001	0.0001	0.000100001	0.1491	0.347336	0.372115	0.219472	0.112271	0.436937	0.203234	0.215756	0.148801
9	63394447	63399247	-	2300009A05Rik	protein_coding	2300009A05Rik	ensembl_havana	8	2.85719	1.48817	1.23483	4.16536	2.62829	5.65261	4.72273	4.7287	2.95566	5.8236	2.47614	2.95184
6	129208412	129238726	-	2310001H17Rik	lincRNA	2310001H17Rik	havana	7	7.9853	13.7517	12.9087	6.08358	4.64637	6.32419	5.24676	3.9406	3.33231	6.24924	6.75293	2.95184
1	93151349	93160949	-	2310007B03Rik	protein_coding	2310007B03Rik	ensembl_havana	12	0.0001	0.0001	0.0001	0.0001	0.047032	0.0001	0.165784	0.168979	0.0001	0.0001	0.168921	0.0001
9	73039718	73042780	+	2310009A05Rik	processed_transcript	2310009A05Rik	havana	2	4.76571	6.47389	6.63449	5.77628	4.48171	8.56205	7.04991	7.26188	8.73234	7.66274	5.83219	4.52299
1	138851983	138856853	-	2310009B15Rik	protein_coding	2310009B15Rik	ensembl_havana	2	1.31876	0.18238	0.617467	3.89133	3.05068	2.85434	3.58992	4.05319	3.58099	2.82709	3.20769	3.12547
7	90124822	90129985	-	2310010J17Rik	bidirectional_promoter_lncRNA	2310010J17Rik	havana	2	1.46527	1.43027	1.12258	0.164518	0.563284	0.167996	0.55238	0.39415	0.199038	0.744045	0.337741	0.289486
10	80318254	80320538	-	2310011J03Rik	protein_coding	2310011J03Rik	ensembl_havana	8	28.3512	19.4724	15.4343	18.963	18.8668	20.0917	23.1406	16.325	18.8495	21.2025	16.1506	19.0417
12	80120546	80132845	-	2310015A10Rik	processed_transcript	2310015A10Rik	havana	2	13.1867	14.7419	11.1127	15.1814	11.3107	6.10033	7.62157	4.67241	2.78523	9.29942	9.51033	7.81353
7	27553233	27582100	+	2310022A10Rik	protein_coding	2310022A10Rik	ensembl_havana	15	11.4285	13.4767	10.6637	18.8417	20.6502	22.2743	26.8961	21.8418	24.2208	22.6161	15.7004	20.1414
8	124635756	124663370	-	2310022B05Rik	protein_coding	2310022B05Rik	ensembl_havana	7	2.93045	1.48528	0.841964	14.4689	15.6284	10.7455	16.0162	11.4275	11.9861	15.0278	13.1681	12.2122
4	138215714	138216190	+	2310026L22Rik	lincRNA	2310026L22Rik	havana	3	0.58617	0.110113	0.112348	0.109712	0.0001	0.0560654	0.221012	0.168979	0.199038	0.0001	0.394015	0.0001
9	50739691	50746537	-	2310030G06Rik	protein_coding	2310030G06Rik	ensembl_havana	2	0.0001	0.0001	0.0001	0.109712	0.047032	0.0001	0.110556	0.112686	0.497445	0.0001	0.0001	0.0001
11	46440362	46447249	-	2310031A07Rik	lincRNA	2310031A07Rik	ensembl	1	0.000710923	0.750766	0.00070876	0.000100072	0.000100008	0.796502	1.24149	0.482454	0.000100005	0.00455736	0.705205	1.19293
11	59208321	59210739	+	2310033P09Rik	protein_coding	2310033P09Rik	ensembl_havana	6	11.7947	5.28073	7.29625	6.3028	6.85217	6.88384	8.11862	10.0202	9.6486	11.8288	6.41528	6.82961
19	46348201	46350303	-	2310034G01Rik	protein_coding	2310034G01Rik	havana	2	0.0001	0.0001	0.954212	0.383743	0.281692	0.951512	0.607608	0.39415	1.24346	0.595256	0.450288	0.0001
5	100210692	100218050	+	2310034O05Rik	lincRNA	2310034O05Rik	havana	6	0.219876	0.550166	0.224597	0.0001	0.0001	0.0001	0.055328	0.0563928	0.149304	0.0001	0.0001	0.0001
17	46772635	46773397	+	2310039H08Rik	protein_coding	2310039H08Rik	ensembl_havana	6	1.53853	0.715185	1.23483	3.23366	3.19147	2.96627	6.24087	6.92412	7.36081	4.24059	3.09514	3.82
5	76928368	76947759	+	2310040G07Rik	antisense	2310040G07Rik	ensembl_havana	3	0.0001	0.0001	0.168473	0.0001	0.0001	0.223962	0.27624	0.168979	0.0498345	0.0001	0.0563735	0.463118
6	86483376	86488228	-	2310040G24Rik	lincRNA	2310040G24Rik	havana	1	0.146617	0.330139	0.673591	0.548161	1.0326	1.79099	0.938976	1.01337	1.4424	1.19041	0.394015	1.09977
16	93792136	93794902	-	2310043M15Rik	antisense	2310043M15Rik	havana	2	2.58049	2.99851	1.77067	1.49961	1.51583	0.764515	0.456237	0.603478	0.363759	1.02549	0.916978	0.784603
7	34389732	34393613	+	2310043P16Rik	TEC	2310043P16Rik	havana	1	2.49283	3.68554	3.42368	5.20668	3.81184	3.97364	4.69448	3.37767	2.98417	4.24059	4.1665	4.34089
7	83659575	83660964	+	2310044K18Rik	antisense	2310044K18Rik	havana	1	0.0001	0.0001	0.0001	0.108068	0.313462	0.0001	0.055328	0.168979	0.0001	0.148889	0.20747	0.173732
5	149231332	149237985	+	2310047D07Rik	lincRNA	2310047D07Rik	havana	1	2.05134	1.9697	1.04814	0.164518	0.047032	0.279927	0.0001	0.168979	0.149304	0.0001	0.225194	0.324614
7	131338220	131362760	-	2310057M21Rik	protein_coding	2310057M21Rik	ensembl_havana	10	1.97809	2.4754	3.7043	6.02877	6.80524	5.37278	12.095	10.4706	12.0856	10.2665	10.8609	8.04503
11	58965748	58978051	-	2310058D17Rik	processed_transcript	2310058D17Rik	havana	1	1.97808	1.04522	1.40321	1.09622	1.1734	1.51117	0.82852	1.52001	0.945056	1.71117	2.25104	0.173732
17	35892677	35897432	-	2310061I04Rik	protein_coding	2310061I04Rik	ensembl_havana	15	17.2159	14.7969	10.2708	12.7699	11.2638	14.8869	15.8505	16.1562	18.7998	17.334	15.2502	14.9324
15	99972158	99973288	-	2310068J16Rik	antisense	2310068J16Rik	havana	2	0.0001	0.0001	0.0001	0.27663	0.093964	0.112031	0.224643	0.0565247	0.149304	1.04162	0.281468	0.289486
7	44246722	44252320	+	2410002F23Rik	protein_coding	2410002F23Rik	ensembl_havana	16	6.66664	3.46551	4.99516	47.1826	45.1017	30.5012	86.4286	75.5176	51.1273	61.5988	67.2466	46.9964
3	145938014	145944830	+	2410004B18Rik	protein_coding	2410004B18Rik	ensembl_havana	13	5.34798	5.61077	7.01563	6.30281	7.41535	7.6114	8.00816	6.86783	6.9132	6.10045	6.64038	8.45017
12	17003319	17011728	-	2410004P03Rik	protein_coding	2410004P03Rik	ensembl_havana	8	0.219876	0.385146	0.0001	0.712579	0.844876	0.391858	0.386696	0.39415	0.248773	0.297678	0.450288	0.405241
11	62602877	62604808	+	2410006H16Rik	processed_transcript	2410006H16Rik	havana	1	4.83517	3.19048	5.05128	21.4293	30.0835	38.0566	20.4897	25.6696	23.1764	17.6316	20.4837	28.7651
17	56607452	56609772	-	2410015M20Rik	protein_coding	2410015M20Rik	ensembl_havana	6	5.27473	6.05082	6.79113	10.3585	9.85581	16.5099	14.2489	15.1429	21.0876	15.6229	11.3111	15.9742
14	56811989	56813900	+	2410022M11Rik	bidirectional_promoter_lncRNA	2410022M11Rik	havana	2	0.805946	0.990218	0.224597	1.26064	1.64272	0.951512	1.82262	1.91406	1.24346	2.38073	1.23812	0.694627
5	118245227	118266094	+	2410131K14Rik	protein_coding	2410131K14Rik	ensembl_havana	7	14.7984	19.5824	19.0823	6.90567	7.13376	8.8986	6.35132	4.33465	5.52063	3.79422	6.35901	6.94537
8	57488054	57508878	+	2500002B13Rik	processed_transcript	2500002B13Rik	havana	2	1.09898	0.440153	0.729715	2.52118	2.39363	0.671685	2.43013	2.98362	1.89001	1.63678	2.9826	1.79429
2	153341157	153346074	-	2500004C02Rik	processed_transcript	2500004C02Rik	havana	4	2.19786	2.5304	0.841964	2.46638	1.22033	1.95889	2.59582	2.30811	1.99109	2.30633	2.41986	1.85217
16	18836578	18840161	+	2510002D24Rik	protein_coding	2510002D24Rik	ensembl_havana	10	6.44686	4.45563	3.25531	2.11501	1.79653	3.20707	2.72549	2.77346	1.24346	3.19906	1.68831	1.50491
16	21649045	21694666	-	2510009E07Rik	protein_coding	2510009E07Rik	ensembl_havana	10	0.293135	0.385146	0.617467	27.0743	29.0979	37.5529	18.2253	15.9873	16.5617	18.7475	21.9468	30.7329
5	120552055	120553040	-	2510016D11Rik	TEC	2510016D11Rik	havana	1	3.37	1.92533	1.96445	6.19319	8.11933	4.64523	5.68859	4.50353	3.38205	8.62987	5.62745	4.68816
5	3585112	3586375	+	2510017J16Rik	antisense	2510017J16Rik	havana	1	0.0001	0.605172	0.224597	0.822192	0.751012	0.839581	0.938976	1.18225	0.596914	0.669651	0.95675	0.405241
4	147940895	147947315	+	2510039O18Rik	protein_coding	2510039O18Rik	ensembl_havana	6	89.3757	66.503	59.3234	64.2329	73.1201	68.9495	78.8657	51.5643	74.9998	63.0123	44.7938	67.8901
7	126648543	126649595	-	2510046G10Rik	antisense	2510046G10Rik	ensembl_havana	2	0.0001	0.275133	0.239833	0.726372	0.709602	1.29089	1.54648	1.43152	2.10864	1.48799	0.698843	0.69983
2	29868723	29870318	-	2600006K01Rik	antisense	2600006K01Rik	ensembl_havana	2	0.293135	0.115814	0.0562242	0.958814	1.14409	0.846037	0.76017	0.675614	1.1634	0.519283	0.733686	0.843888
6	13867735	13871519	-	2610001J05Rik	protein_coding	2610001J05Rik	havana	7	8.71788	12.1565	11.2811	23.9504	27.5492	22.7781	28.1664	24.6001	26.9065	26.559	29.3185	26.6236
X	107782751	107816335	-	2610002M06Rik	protein_coding	2610002M06Rik	ensembl_havana	7	22.5638	23.983	33.0012	21.9774	21.4011	27.9268	37.5552	41.0376	42.5728	25.5918	43.9498	33.9161
8	20385782	20424815	-	2610005L07Rik	transcribed_unprocessed_pseudogene	2610005L07Rik	havana	12	21.4884	16.7204	18.1014	29.141	31.4697	30.2979	38.6624	44.2818	30.5407	47.5167	40.3716	35.5189
10	79064374	79097601	-	2610008E11Rik	protein_coding	2610008E11Rik	ensembl_havana	6	8.49811	10.3963	5.72477	15.9487	11.9208	8.00315	15.961	16.4376	12.5829	16.8133	24.9293	15.9163
5	131996179	131998414	-	2610011E03Rik	TEC	2610011E03Rik	havana	1	0.0001	0.0001	0.0001	0.0001	0.0001	0.0001	0.165784	0.112686	0.0001	0.372073	0.112647	0.115854
6	148831452	148833113	+	2610017A05Rik	TEC	2610017A05Rik	havana	1	0.0001	0.0001	0.0001	0.0001	0.0001	0.0001	0.165784	0.337857	0.0498345	0.0744945	0.0563735	0.0001
16	11203366	11246202	+	2610020C07Rik	antisense	2610020C07Rik	havana	2	1.279	0.796396	1.26255	1.56013	1.00029	2.15311	3.14754	4.27204	3.98877	3.99064	3.83726	3.40166
7	41599230	41628534	+	2610021A01Rik	protein_coding	2610021A01Rik	havana	2	1.31794	1.49406	1.32517	9.85247	8.9819	8.02456	18.0816	19.5194	22.289	10.6382	20.1638	13.1765
11	85791661	85832224	-	2610027K06Rik	processed_transcript	2610027K06Rik	havana	7	0.0733587	0.394015	0.0604436	0.116326	0.292111	0.0001	0.118651	0.407972	0.103354	0.0001	0.05874	0.31491
9	45797348	45799061	-	2610028D06Rik	TEC	2610028D06Rik	havana	1	0.146617	1.10023	0.0562242	0.438549	0.797944	0.279927	0.883748	0.7882	0.348242	1.56239	0.95675	0.0001
4	125887851	125922418	-	2610028E06Rik	lincRNA	2610028E06Rik	havana	7	0.0733587	0.110113	0.0001	0.164518	0.797944	0.0001	0.055328	0.112686	0.0001	0.0744945	0.0001	0.231609
11	113043895	113201839	-	2610035D17Rik	lincRNA	2610035D17Rik	havana	7	2.93045	1.15524	0.898088	1.09622	1.36113	0.0560654	1.49126	0.900785	0.199038	0.372073	0.450288	0.231609
15	96134819	96284496	-	2610037D02Rik	lincRNA	2610037D02Rik	havana	2	6.22709	7.70102	8.64323	7.83737	5.02182	2.9103	8.2843	6.92412	4.27727	8.03471	7.99094	4.45665
8	129216354	129234407	-	2610044O15Rik8	protein_coding	2610044O15Rik8	ensembl_havana	10	7.04549	5.62316	6.23771	10.0155	8.3868	9.06517	15.8186	15.1747	14.5088	15.6838	19.4848	7.8714
1	9560832	9631176	-	2610203C22Rik	processed_transcript	2610203C22Rik	havana	8	0.512911	0.397442	0.0001	7.11536	3.76751	5.00952	4.99629	5.11834	4.12527	4.61256	6.95886	6.36659
13	104684931	104694995	+	2610204G07Rik	antisense	2610204G07Rik	havana	1	0.0001	0.0001	0.0001	0.219324	0.187828	0.112031	0.055328	0.0001	0.0001	0.0001	0.0001	0.0579772
4	10874498	10899426	+	2610301B20Rik	protein_coding	2610301B20Rik	ensembl_havana	15	0.659428	1.43027	0.505218	4.76823	5.11569	5.76454	13.8623	12.2156	12.3343	12.6472	14.2936	7.23476
6	86848399	86849441	-	2610306M01Rik	bidirectional_promoter_lncRNA	2610306M01Rik	havana	1	0.0001	0.550166	0.673591	0.493355	0.657148	1.00748	0.662836	0.675614	1.2932	1.11602	1.01302	0.926136
7	128538932	128539544	+	2610306O10Rik	TEC	2610306O10Rik	havana	1	0.366393	0.330139	0.39297	0.548161	0.657148	0.72765	0.55238	0.450443	1.04453	0.669651	0.562835	1.50491
13	28460034	28885621	-	2610307P16Rik	processed_transcript	2610307P16Rik	havana	7	0.366393	0.825198	0.39297	0.0001	0.0001	0.0560654	0.0001	0.0001	0.0001	0.0001	0.0001	0.0001
16	17113398	17125168	-	2610318N02Rik	protein_coding	2610318N02Rik	ensembl_havana	12	1.53797	0.385146	1.01034	2.57599	2.2059	1.34327	15.1878	12.1594	9.69833	12.9448	9.96052	5.90358
11	78261752	78290624	+	2610507B11Rik	protein_coding	2610507B11Rik	ensembl_havana	7	105.639	109.023	109.948	256.218	259.019	222.687	317.233	263.845	275.529	239.774	268.258	236.022
11	59199836	59202386	-	2610507I01Rik	processed_transcript	2610507I01Rik	havana	1	35.2375	41.9701	36.0319	15.5102	14.2205	14.2713	11.1562	11.0335	13.329	9.67139	9.96052	12.6173
9	57075216	57076014	-	2700012I20Rik	lincRNA	2700012I20Rik	ensembl	1	0.293135	0.110113	0.168473	0.164518	0.23476	0.559754	0.331468	0.563028	0.696383	0.967229	0.337741	0.347363
4	139376549	139380380	-	2700016F22Rik	lincRNA	2700016F22Rik	ensembl	1	0.399958	0.126703	0.0001	0.461851	0.424606	0.0001	0.0001	0.252903	0.0969763	0.0001	0.485498	0.0001
5	23850597	23855039	+	2700038G22Rik	lincRNA	2700038G22Rik	havana	5	1.61179	0.0001	0.336845	1.15103	1.26726	0.72765	5.08108	5.46051	2.63603	3.05028	3.88297	1.67854
19	32389216	32391185	+	2700046G09Rik	lincRNA	2700046G09Rik	ensembl	1	0.0001	0.0001	0.0001	0.328937	0.422488	0.559754	0.497152	0.281564	0.298507	0.372073	0.562835	0.173732
12	71136848	71243304	+	2700049A03Rik	protein_coding	2700049A03Rik	ensembl_havana	17	9.52373	10.7264	14.0312	13.2632	14.6429	16.7338	42.9675	43.2893	36.9529	35.1144	38.7724	28.3021
18	24470850	24477799	+	2700062C07Rik	protein_coding	2700062C07Rik	ensembl_havana	8	0.58617	3.19048	2.75019	6.34155	7.62867	4.30944	8.56044	5.79827	6.31638	9.29942	8.44113	8.21867
19	7417625	7425905	+	2700081O15Rik	protein_coding	2700081O15Rik	ensembl_havana	10	0.0001	0.0551066	0.224597	1.64428	1.78352	0.951512	4.91539	5.01016	4.07833	4.0174	3.65788	2.72033
12	55045661	55080111	-	2700097O09Rik	protein_coding	2700097O09Rik	ensembl_havana	5	3.15022	3.90557	3.76042	6.3028	5.20955	3.86171	11.3771	11.7653	9.30046	8.77866	10.2982	5.90358
17	94750100	94775133	+	2700099C18Rik	transcribed_unprocessed_pseudogene	2700099C18Rik	havana	8	1.68505	1.89799	2.84451	2.22353	2.5098	3.05959	8.4712	10.3707	10.115	5.62292	9.43893	6.35158
11	64079484	64083260	+	2810001G20Rik	antisense	2810001G20Rik	havana	7	4.54214	2.36538	3.19918	1.97312	0.985672	0.895547	2.09877	2.87104	1.89001	2.52951	2.08222	2.37307
2	94406151	94411683	+	2810002D19Rik	processed_transcript	2810002D19Rik	havana	5	1.68505	1.81532	2.63794	1.59464	0.844876	1.6231	0.994204	0.675614	1.96803	1.04162	1.96967	1.73642
8	124836945	124863121	-	2810004N23Rik	protein_coding	2810004N23Rik	ensembl_havana	8	6.37361	3.90557	7.74524	16.1131	13.6104	16.1741	33.5235	29.8916	29.8906	28.1956	27.9681	17.942
5	124328089	124341845	+	2810006K23Rik	protein_coding	2810006K23Rik	ensembl_havana	6	2.27112	1.59529	2.24507	5.69994	4.28465	7.35476	11.6947	11.8756	15.1267	9.82018	11.4394	10.6593
8	123042466	123044603	+	2810013P06Rik	bidirectional_promoter_lncRNA	2810013P06Rik	havana	1	4.68866	7.31597	7.184	10.9613	10.3721	6.43612	8.61567	7.093	6.41585	8.62987	8.38486	6.65598
11	58867216	58883289	+	2810021J22Rik	protein_coding	2810021J22Rik	ensembl_havana	15	10.1951	9.18132	8.42129	6.59733	5.75867	4.58926	6.22642	6.01867	5.4985	6.57888	6.62211	5.62516
1	157412352	157420237	+	2810025M15Rik	transcribed_processed_pseudogene	2810025M15Rik	ensembl_havana	13	0.805946	0.110113	0.729715	2.6856	3.14454	3.19013	6.2961	6.13602	6.5077	3.34785	4.95217	3.76212
12	111572317	111574403	-	2810029C07Rik	bidirectional_promoter_lncRNA	2810029C07Rik	havana	2	0.0001	0.0001	0.168473	0.219324	0.328624	0.279927	0.82852	0.675614	0.0001	0.372073	0.394015	0.463118
15	75642129	75653644	+	2810039B14Rik	transcribed_unitary_pseudogene	2810039B14Rik	havana	7	0.0798095	0.16512	0.0001	1.19024	1.36327	0.674083	2.69166	2.65172	1.7779	3.24781	2.05544	1.31138
14	20641009	20644049	+	2810402E24Rik	antisense	2810402E24Rik	havana	1	3.66303	3.63053	3.81655	5.53552	6.28899	3.63785	7.89771	8.95066	5.27196	7.73713	9.00387	6.19296
X	108833800	108974907	+	2810403D21Rik	processed_transcript	2810403D21Rik	havana	8	0.0001	2.20036	1.12258	2.6856	3.33227	2.01485	4.91539	5.12275	2.03922	3.94301	4.83962	1.33128
4	137387266	137388383	-	2810405F17Rik	lincRNA	2810405F17Rik	havana	1	0.879204	1.26525	0.280721	0.876998	1.22033	0.447823	1.04943	0.675614	0.348242	0.595256	1.29439	0.868258
16	87784075	87839294	+	2810407A14Rik	lincRNA	2810407A14Rik	ensembl_havana	5	0.0001	0.220126	0.336845	0.0001	0.0001	0.559754	0.0001	0.112686	0.248773	0.0001	0.0001	0.463118
11	69897352	69900988	-	2810408A11Rik	protein_coding	2810408A11Rik	ensembl_havana	17	2.05134	1.6503	1.45933	1.15103	0.563284	0.671685	1.49126	2.42069	1.74081	1.19041	1.29439	0.694627
1	64679871	64690660	-	2810408I11Rik	processed_transcript	2810408I11Rik	havana	2	0.0001	0.110113	0.39297	0.493355	0.187828	0.559754	1.32557	1.18225	1.5916	0.297678	0.844203	0.984013
11	120185400	120189853	-	2810410L24Rik	processed_transcript	2810410L24Rik	havana	3	0.0001	0.16512	0.0001	0.109712	0.047032	0.0001	0.331468	0.39415	0.248773	0.297678	0.168921	0.0001
1	151748949	151755019	-	2810414N06Rik	lincRNA	2810414N06Rik	havana	1	0.0001	0.0001	0.0001	0.493355	0.46942	0.671685	1.04943	0.900786	0.795852	1.26481	1.35067	0.63675
10	77486664	77516431	+	2810425M01Rik	lincRNA	2810425M01Rik	ensembl	1	0.0001	0.0001	0.0001	0.169279	0.145391	0.0888408	0.0001	0.491594	0.292077	0.0001	0.091932	0.0001
3	135425237	135427933	-	2810428J06Rik	TEC	2810428J06Rik	havana	1	0.58617	1.48528	1.40321	1.53467	1.40806	0.72765	2.3749	2.92733	1.09426	1.4136	2.58868	0.463118
13	3478230	3501394	+	2810429I04Rik	lincRNA	2810429I04Rik	havana	8	0.0001	0.0001	0.0001	0.0549061	0.0001	0.0001	0.497152	0.337857	0.746118	0.297678	0.112647	0.0001
6	134897961	134901109	+	2810454H06Rik	antisense	2810454H06Rik	havana	1	0.0733587	1.15524	0.561342	1.04142	0.563284	0.0560654	1.65694	1.23854	0.509303	2.23194	1.0693	0.173732
8	123838553	123840786	-	2810455O05Rik	lincRNA	2810455O05Rik	havana	1	0.146617	0.385146	0.336845	0.164518	0.328624	0.167996	0.773292	0.957078	0.596914	1.4136	0.506562	0.405241
5	25100983	25110110	+	2900005J15Rik	processed_transcript	2900005J15Rik	ensembl_havana	6	3.00371	2.69542	1.68383	4.32978	4.03625	1.84696	2.20922	2.13923	0.845587	2.45512	2.30732	1.15764
5	113086323	113221237	-	2900026A02Rik	protein_coding	2900026A02Rik	ensembl_havana	10	1.17224	0.550166	0.505218	24.882	24.9678	15.0548	26.1166	22.2358	11.4888	33.4777	28.362	12.9646
11	120229802	120231586	-	2900052L18Rik	processed_transcript	2900052L18Rik	ensembl_havana	6	0.0001	0.0551066	0.0001	0.876998	0.140896	0.0001	1.04943	0.7882	0.149304	0.744045	0.900477	0.0001
1	118458652	118459268	-	2900060B14Rik	antisense	2900060B14Rik	ensembl_havana	1	0.0001	0.0001	0.280721	0.0549061	0.0001	0.0001	0.0001	0.112686	0.0498345	0.0001	0.0001	0.0579772
7	81523550	81531499	+	2900076A07Rik	lincRNA	2900076A07Rik	havana	7	0.821258	3.44519	1.93181	5.59422	3.89481	2.9319	5.59806	3.86156	3.13968	1.78565	5.51491	2.31982
5	31581079	31581710	+	2900076G11Rik	TEC	2900076G11Rik	havana	1	0.0001	0.0001	0.112348	0.164518	0.140896	0.167996	0.0001	0.0001	0.0001	0.223284	0.0001	0.0001
10	39657428	39658427	-	2900078I11Rik	TEC	2900078I11Rik	havana	1	0.0733587	0.16512	0.0562242	0.164518	0.093964	0.223962	0.994204	0.39415	0.0498345	0.372073	0.844203	0.289486
5	144241690	144256187	-	2900089D17Rik	antisense	2900089D17Rik	havana	1	0.0001	0.0551066	0.224597	0.219324	0.331347	0.72765	0.165784	0.0563928	0.149304	0.0744945	0.281468	0.347363
2	163419795	163420362	+	2900093K20Rik	antisense	2900093K20Rik	havana	1	0.0001	0.220126	0.224597	0.98661	0.46942	0.951512	0.386696	0.731907	0.149304	0.595256	0.337741	0.231609
2	156388065	156392980	-	2900097C17Rik	lincRNA	2900097C17Rik	ensembl_havana	2	101.877	129.871	133.8	194.891	183.786	186.423	238.972	211.587	253.547	187.192	225.648	200.545
9	109827943	109832707	-	3000002C10Rik	transcribed_processed_pseudogene	3000002C10Rik	ensembl_havana	6	1.91285	1.53447	1.8874	1.95556	0.986143	2.12038	5.0155	3.7979	3.58561	1.85996	2.54458	2.78617
6	148944867	148947130	+	3010003L21Rik	antisense	3010003L21Rik	ensembl_havana	2	0.0001	0.0551066	0.0001	0.758662	0.187828	0.671685	1.43546	1.53257	0.80647	0.595256	0.506562	0.752504
16	13671929	13678389	+	3110001I22Rik	protein_coding	3110001I22Rik	ensembl_havana	4	1.53853	3.19048	4.37779	3.67211	3.3792	6.43464	4.47357	5.29163	8.33827	3.28235	4.8959	7.64229
13	78171630	78182974	+	3110006O06Rik	lincRNA	3110006O06Rik	havana	1	0.0001	0.220126	0.0001	0.219324	0.23476	0.112031	0.221012	0.168979	0.0995691	0.0001	0.0563735	0.0001
1	120121187	120188190	+	3110009E18Rik	protein_coding	3110009E18Rik	ensembl_havana	15	0.0001	0.330139	0.0562242	0.328937	0.422488	1.00748	0.938976	1.06966	1.39267	0.81844	1.46321	0.984013
4	108719649	108781905	+	3110021N24Rik	protein_coding	3110021N24Rik	ensembl	1	0.0001	0.0001	0.0001	0.576596	1.03829	0.0001	0.0001	0.0632435	0.0001	0.0001	0.182083	0.0001
7	81782182	81789479	-	3110040N11Rik	protein_coding	3110040N11Rik	ensembl_havana	14	0.366393	1.21024	2.24507	2.79521	3.52	2.9103	5.41244	5.46051	5.42116	4.38938	5.12099	4.51452
1	169969409	169972397	+	3110045C21Rik	antisense	3110045C21Rik	havana	2	0.0001	0.0001	0.39297	0.0549061	0.0001	0.112031	0.110556	0.168979	0.0995691	0.446467	0.168921	0.231609
12	20874125	20921263	-	3110053B16Rik	transcribed_unprocessed_pseudogene	3110053B16Rik	havana	8	0.0001	0.294141	0.0562242	0.124106	0.267151	0.628832	0.569372	0.85453	0.308575	0.697528	0.786827	0.810403
12	70991615	71015833	-	3110056K07Rik	processed_transcript	3110056K07Rik	havana	9	5.12821	6.98593	9.4851	8.38544	8.2132	5.26085	5.96473	6.81154	5.17249	4.68696	8.27231	4.16726
1	176745564	176746983	-	3110062G12Rik	TEC	3110062G12Rik	havana	1	0.0001	0.385146	0.0001	0.164518	0.093964	0.0001	0.221012	0.112686	0.149304	0.0001	0.168921	0.463118
X	150463726	150466157	+	3110067C02Rik	processed_pseudogene	3110067C02Rik	havana	1	0.372768	0.282834	1.20392	0.22136	0.144702	0.0570878	0.451311	0.288759	0.0001	0.382058	0.572226	0.179463
13	119487261	119488384	-	3110070M22Rik	protein_coding	3110070M22Rik	ensembl	2	0.0001	0.110113	0.112348	0.31585	0.23476	0.0560654	0.331468	0.7882	0.0001	0.520862	0.168921	0.0001
5	139359739	139460528	-	3110082I17Rik	protein_coding	3110082I17Rik	ensembl_havana	11	3.56519	3.93691	3.89124	19.2494	17.2484	10.1562	21.1594	21.4039	14.7128	18.8136	14.0818	8.51499
14	57999323	58003698	+	3110083C13Rik	bidirectional_promoter_lncRNA	3110083C13Rik	havana	2	0.659428	0.770192	0.561342	0.0549061	0.093964	0.335892	0.662836	0.337857	0.348242	0.0001	0.337741	0.173732
18	37655451	37661743	+	3222401L13Rik	lincRNA	3222401L13Rik	ensembl_havana	3	0.0001	0.0001	0.0001	1.42506	2.06511	1.51117	1.49126	1.52001	1.39267	1.85996	1.51949	1.09977
2	150310935	150362766	-	3300002I08Rik	protein_coding	3300002I08Rik	ensembl_havana	10	0.0001	0.0001	0.0001	0.590767	0.38226	0.223962	0.687813	0.735935	0.261486	1.04162	0.537397	0.868258
17	5798657	5803241	+	3300005D01Rik	lincRNA	3300005D01Rik	havana	7	0.146617	0.110113	0.0562242	0.274131	0.46942	0.223962	0.221012	0.225271	0.199038	0.446467	0.506562	0.405241
14	32659119	32685294	-	3425401B19Rik	protein_coding	3425401B19Rik	ensembl_havana	4	0.0001	0.0001	0.0001	0.0001	0.047032	0.112031	1.7674	2.19552	0.54718	3.34785	2.7575	0.0001
X	135022734	135060337	-	3632454L22Rik	processed_transcript	3632454L22Rik	havana	7	1.53853	1.15524	0.168473	0.931804	0.187828	0.0001	0.221012	0.281564	0.0995691	0.148889	0.450288	0.231609
14	12284173	12303232	+	3830406C13Rik	protein_coding	3830406C13Rik	ensembl_havana	16	7.03294	13.1641	11.4424	20.7535	20.9733	21.8266	22.621	31.4102	29.8295	29.3003	33.6694	24.8294
13	107022553	107055498	+	3830408C21Rik	processed_transcript	3830408C21Rik	ensembl_havana	2	0.219876	0.770192	0.224597	1.58948	0.93874	0.559754	0.82852	1.18225	1.54187	1.85996	1.23812	0.520995
19	28893042	28967801	-	4430402I18Rik	protein_coding	4430402I18Rik	ensembl_havana	15	0.293135	0.0001	0.0001	0.383743	0.093964	0.0001	0.165784	0.0563928	0.0001	0.148889	0.281468	0.0001
2	93027956	93044733	+	4631405J19Rik	antisense	4631405J19Rik	ensembl_havana	10	0.0001	0.0001	0.112348	0.274131	0.093964	0.112031	0.110556	0.112686	0.0001	0.669651	0.0563735	0.231609
3	89767511	89773241	-	4632404H12Rik	lincRNA	4632404H12Rik	ensembl_havana	2	2.71067	3.85056	3.19918	17.2092	16.661	10.4656	24.9631	22.5735	13.3787	25.443	24.9856	13.7749
3	19894886	19898985	+	4632415L05Rik	lincRNA	4632415L05Rik	ensembl_havana	5	2.78393	3.30049	4.77066	12.4959	11.0291	10.8574	21.7599	19.8715	19.5458	19.2683	16.3194	16.1478
9	122127294	122130015	+	4632418H02Rik	TEC	4632418H02Rik	havana	1	4.02933	2.31038	1.8522	1.58948	1.50192	1.56713	0.82852	0.563028	0.596914	1.4136	1.0693	1.15764
7	92734166	92741469	-	4632427E13Rik	bidirectional_promoter_lncRNA	4632427E13Rik	ensembl_havana	5	5.71428	5.50075	6.11764	2.85002	3.33227	1.84696	3.58992	3.82801	2.38736	3.49664	4.0518	1.73642
16	30008667	30021431	+	4632428C04Rik	lincRNA	4632428C04Rik	havana	2	0.0733587	1.04522	0.0001	2.24715	1.64272	0.839581	0.110556	0.0563928	0.0995691	0.297678	0.112647	0.115854
7	5034118	5035247	+	4632433K11Rik	protein_coding	4632433K11Rik	ensembl	1	0.0973211	0.0481022	1.10919	0.000117534	1.1164	0.0001	0.339563	1.16446	0.00308886	0.0080202	0.0443979	0.369395
3	121787500	121788573	-	4633401B06Rik	TEC	4633401B06Rik	havana	1	0.0001	0.0001	0.224597	0.548161	0.46942	0.0001	0.441924	0.619321	0.54718	0.520862	0.675383	0.289486
3	89337850	89347832	+	4731419I09Rik	antisense	4731419I09Rik	havana	1	0.0001	0.523364	0.35212	1.7229	2.16776	1.48723	0.810437	0.697922	1.30229	0.970089	0.686328	2.17787
11	73015856	73018842	-	4732414G09Rik	lincRNA	4732414G09Rik	havana	2	0.512911	0.275133	0.168473	0.164518	0.187828	0.223962	0.0001	0.112686	0.0995691	0.0001	0.0563735	0.115854
6	148212253	148215732	+	4732416N19Rik	TEC	4732416N19Rik	havana	1	3.15022	1.26525	0.729715	1.42506	0.985672	0.72765	2.65684	2.81474	0.691954	1.93436	2.6889	1.31536
8	123744631	123754727	-	4732419C18Rik	lincRNA	4732419C18Rik	havana	2	0.0733587	0.0551066	0.0562242	0.784937	0.93874	0.839581	0.55238	0.0001	0.0001	0.297678	0.450288	0.115854
1	6209866	6215294	-	4732440D04Rik	antisense	4732440D04Rik	ensembl_havana	2	7.18995	10.2904	7.17938	4.70749	5.29382	1.84212	3.70139	2.93966	0.935403	4.4689	4.50444	2.11325
10	95746077	95797237	+	4732465J04Rik	lincRNA	4732465J04Rik	havana	6	3.22348	3.30049	4.37779	0.548161	0.610216	0.503789	0.110556	0.112686	0.0995691	0.0001	0.0563735	0.0001
7	25376819	25566418	+	4732471J01Rik	antisense	4732471J01Rik	ensembl_havana	8	3.15971	1.57032	0.743399	2.49688	2.51556	0.700292	1.73278	2.04496	1.37825	2.15994	2.2402	1.38827
12	86290761	86306007	-	4732487G21Rik	lincRNA	4732487G21Rik	havana	1	7.66971	9.98521	6.62463	12.384	14.8872	11.8664	8.26067	7.09343	6.5479	8.8392	6.49932	5.93865
17	12318853	12327251	+	4732491K20Rik	bidirectional_promoter_lncRNA	4732491K20Rik	havana	2	0.0001	0.0001	0.0001	0.164518	0.0001	0.335892	0.110556	0.0563928	0.0498345	0.0001	0.112647	0.0579772
7	116546865	116549365	+	4732496C06Rik	lincRNA	4732496C06Rik	havana	1	7.25271	8.85616	8.19424	4.60381	4.5525	3.86171	3.20332	2.25181	4.37674	2.45512	3.32024	3.70424
8	91449521	91474599	-	4831440D22Rik	antisense	4831440D22Rik	havana	1	0.0001	0.0001	0.000103856	0.0566411	0.330119	0.514976	0.0001	0.242259	0.215068	0.0001	0.147522	0.0001
5	25499067	25501542	+	4831440E17Rik	lincRNA	4831440E17Rik	ensembl	1	0.732687	0.550166	0.561342	0.602967	0.375556	0.839581	0.773292	0.731907	0.248773	0.669651	0.731656	0.347363
19	53460631	53462724	+	4833407H14Rik	lincRNA	4833407H14Rik	ensembl	1	22.9301	28.7685	15.9394	11.619	7.79081	4.14154	8.2843	9.40101	2.8847	11.5313	9.06014	3.18335
8	10899922	10903894	+	4833411C07Rik	processed_transcript	4833411C07Rik	havana	1	0.0001	0.0001	0.0001	1.51689	1.64272	1.94022	2.16846	2.63395	1.49214	1.71117	1.64761	1.21552
1	78465448	78466927	-	4833412K13Rik	TEC	4833412K13Rik	havana	1	0.0001	0.0001	0.0001	0.164518	0.516352	0.391858	0.386696	0.844493	0.248773	0.148889	0.337741	0.463118
17	31557126	31559114	+	4833413E03Rik	lincRNA	4833413E03Rik	ensembl_havana	12	1.53853	1.43027	0.729715	1.86351	1.40806	0.839581	3.25855	3.1525	1.5916	3.57104	2.58868	1.56279
5	3629777	3631723	-	4833413G10Rik	antisense	4833413G10Rik	havana	1	2.70331	2.85449	2.04762	4.77149	3.54431	2.47146	4.37982	4.48133	3.47343	4.45058	7.00612	4.15762
11	95858865	95861045	+	4833417C18Rik	processed_transcript	4833417C18Rik	havana	1	0.0001	0.385146	0.168473	0.602967	0.610216	0.72765	1.32557	1.23854	0.931575	0.669651	1.35067	0.173732
17	87274886	87282815	-	4833418N02Rik	processed_transcript	4833418N02Rik	havana	8	4.10259	5.17072	3.4798	5.75474	4.88103	3.91768	3.20332	3.03991	2.13868	1.04162	2.30732	1.15764
13	119462768	119486121	+	4833420G17Rik	protein_coding	4833420G17Rik	ensembl_havana	8	42.2377	43.1737	28.173	77.0885	67.6868	40.6066	70.1309	72.0763	58.9084	63.7504	74.7237	55.7135
1	87865073	87865917	+	4833421G17Rik	TEC	4833421G17Rik	havana	1	0.58617	0.110113	0.0001	0.274131	0.328624	0.447823	0.221012	0.112686	0.298507	0.0001	0.506562	0.0001
13	91701665	91741873	-	4833422C13Rik	antisense	4833422C13Rik	havana	3	2.3051	0.0001	0.0001	0.171137	0.459156	0.625027	0.635383	0.961299	1.20052	0.361281	0.735795	0.559901
13	54551218	54565436	-	4833439L19Rik	protein_coding	4833439L19Rik	ensembl_havana	18	49.3404	51.8173	52.2277	63.0431	62.623	64.0154	59.0629	57.3972	63.0918	55.9265	55.3678	70.7374
9	108567533	108569175	+	4833445I07Rik	lincRNA	4833445I07Rik	havana	1	0.146617	0.220126	0.168473	0.98661	0.844876	0.72765	2.54059	1.97035	1.54187	2.6783	1.57576	1.38915
12	110841029	110843805	+	4921507G05Rik	bidirectional_promoter_lncRNA	4921507G05Rik	havana	1	0.0001	0.0001	0.0001	0.219324	0.23476	0.0001	0.678976	0.63852	0.149304	0.892835	0.410566	0.926136
6	50573302	50596633	-	4921507P07Rik	protein_coding	4921507P07Rik	ensembl_havana	4	3.51652	2.91545	2.52569	0.876998	1.07954	1.56713	1.15989	1.40742	1.64134	0.81844	1.18184	0.463118
3	79212919	79253914	+	4921511C10Rik	antisense	4921511C10Rik	havana	1	0.0001	0.605172	0.336845	0.109712	0.281692	0.0560654	0.055328	0.281564	0.0498345	0.0001	0.112647	0.231609
12	12351522	12392616	-	4921511I17Rik	antisense	4921511I17Rik	havana	1	0.0001	0.0001	0.0001	0.0555799	0.0951022	0.112421	0.112911	0.0001	0.0498345	0.0001	0.341296	0.0585424
4	141115660	141118088	+	4921514A10Rik	antisense	4921514A10Rik	ensembl_havana	7	1.08704	0.663445	0.590892	0.772292	1.43315	1.09785	0.610274	0.942407	0.701137	1.19637	0.22525	0.807417
10	88135919	88137532	+	4921515L22Rik	antisense	4921515L22Rik	havana	1	0.219876	0.110113	0.673591	0.109712	0.328624	0.223962	0.662836	0.7882	0.596914	0.148889	0.900477	0.405241
8	8661801	8664729	+	4921522P10Rik	lincRNA	4921522P10Rik	ensembl_havana	1	0.0001	0.0001	0.0001	0.0001	0.140896	0.0001	0.110556	0.0563928	0.0001	0.0001	0.337741	0.173732
9	107991684	107995657	-	4921523L03Rik	antisense	4921523L03Rik	havana	1	0.0001	0.0551066	0.0001	0.0001	0.093964	0.0001	0.441924	0.0563928	0.0995691	0.372073	0.394015	0.0001
8	85408759	85432834	-	4921524J17Rik	protein_coding	4921524J17Rik	ensembl_havana	9	3.28759	4.2356	6.56663	8.0566	8.2132	9.68211	10.1621	11.9905	13.0306	14.4326	14.8563	9.72347
6	53978691	54018031	+	4921529L05Rik	processed_transcript	4921529L05Rik	havana	2	0.0001	0.0001	0.0001	0.493355	0.281692	0.167996	1.71217	1.12596	1.19373	2.15754	2.13849	1.09977
2	179975993	179979014	+	4921531C22Rik	processed_transcript	4921531C22Rik	havana	1	1.02572	2.5304	2.46957	1.97312	1.26726	2.12679	2.04354	2.81474	2.28789	2.00875	2.08222	2.72033
11	3886088	3895099	-	4921536K21Rik	protein_coding	4921536K21Rik	ensembl_havana	4	0.0001	0.0001	0.0001	0.109712	0.140896	0.112031	0.386696	0.225271	0.54718	0.0001	0.225194	0.0001
6	129322164	129331797	-	4922502D21Rik	protein_coding	4922502D21Rik	ensembl_havana	7	0.0001	0.0001	0.0001	0.274131	0.0001	0.0560654	0.165784	0.281564	0.149304	0.297678	0.168921	0.289486
2	130706200	130906407	-	4930402H24Rik	protein_coding	4930402H24Rik	ensembl_havana	18	38.3876	40.9249	36.2002	22.7994	25.9535	27.1433	17.6178	20.2095	22.0325	18.5243	21.1027	33.2496
1	36332708	36333421	+	4930403P22Rik	lincRNA	4930403P22Rik	havana	1	0.0001	0.0551066	0.336845	0.164518	0.0001	0.0001	0.386696	0.0563928	0.0001	0.0001	0.225194	0.0001
5	124721997	124725080	-	4930404A12Rik	antisense	4930404A12Rik	havana	4	0.0001	0.0001	0.325123	0.00427486	0.000100004	0.000136322	0.00010001	0.00118953	0.386805	0.566028	0.0607167	0.000101494
16	91011249	91016744	+	4930404I05Rik	processed_transcript	4930404I05Rik	havana	1	0.413208	2.80859	2.74247	3.53518	1.97164	2.39544	2.77662	2.82812	3.04428	2.74784	2.39561	2.8182
10	81363067	81365817	-	4930404N11Rik	protein_coding	4930404N11Rik	ensembl_havana	10	2.47911	1.72891	1.39856	3.54312	2.40201	1.84668	2.356	2.90917	2.51186	2.31439	2.47263	4.58966
14	22507174	22542824	-	4930405A10Rik	antisense	4930405A10Rik	havana	1	0.439652	0.0001	0.112348	0.0001	0.187828	0.112031	0.110556	0.112686	0.0001	0.0001	0.0001	0.0579772
2	156714540	156720910	-	4930405A21Rik	processed_transcript	4930405A21Rik	havana	7	0.219876	0.0001	0.112348	0.109712	0.093964	0.167996	0.110556	0.281564	0.696383	0.0001	0.281468	0.0001
5	113320454	113321654	-	4930405N21Rik	TEC	4930405N21Rik	havana	1	0.0001	0.0001	0.0001	0.0001	0.047032	0.167996	0.441924	0.112686	0.0498345	0.0001	0.337741	0.0001
17	63305446	63312974	-	4930405O22Rik	sense_intronic	4930405O22Rik	havana	7	0.952463	0.0001	0.224597	0.0549061	0.093964	0.167996	0.110556	0.112686	0.0995691	0.0001	0.0001	0.173732
15	82059151	82066541	+	4930407I10Rik	protein_coding	4930407I10Rik	ensembl_havana	3	0.0001	0.0001	0.224597	0.109712	0.187828	0.0001	0.165784	0.39415	0.0498345	0.0001	0.112647	0.0579772
4	9770585	9823412	+	4930412C18Rik	processed_transcript	4930412C18Rik	havana	7	0.0001	0.0001	0.0562242	0.876998	0.422488	0.895546	0.773292	0.731907	0.348242	0.372073	0.844203	0.578872
8	57650889	57652360	-	4930412F12Rik	TEC	4930412F12Rik	havana	1	0.0001	0.0551066	0.168473	0.0549061	0.0001	0.381215	0.110556	0.337857	0.298507	0.223284	0.0563735	0.0579772
11	60112219	60115231	-	4930412M03Rik	lincRNA	4930412M03Rik	ensembl_havana	5	0.732687	0.0001	0.673591	0.0549061	0.610216	0.0001	0.386696	0.731907	0.0001	0.148889	0.731656	0.231609
9	99299007	99304676	-	4930422M22Rik	antisense	4930422M22Rik	havana	1	0.0001	0.275133	0.0001	0.712579	0.657148	0.335892	0.994204	1.06966	0.248773	1.85996	0.78793	0.578872
12	81781358	81783032	+	4930423D22Rik	bidirectional_promoter_lncRNA	4930423D22Rik	havana	1	0.659428	2.4754	1.23483	0.493355	0.093964	0.279927	0.0001	0.0001	0.0498345	0.0001	0.0001	0.0001
12	76402751	76403983	-	4930426I24Rik	lincRNA	4930426I24Rik	havana	2	0.512911	0.440153	0.0001	0.219324	0.047032	0.0001	0.110556	0.168979	0.0001	0.81844	0.281468	0.0001
2	18998343	18999802	+	4930426L09Rik	protein_coding	4930426L09Rik	ensembl	1	0.512911	0.715185	0.224597	1.09622	0.46942	0.0560654	0.331468	0.619321	0.0995691	1.04162	0.675383	0.0579772
14	24617557	24788521	+	4930428N03Rik	lincRNA	4930428N03Rik	havana	2	0.659428	0.16512	0.0001	0.0001	0.0001	0.0001	0.055328	0.0001	0.0001	0.0001	0.0001	0.0001
5	107698212	107703481	-	4930428O21Rik	lincRNA	4930428O21Rik	havana	1	0.0733587	0.0001	0.280721	0.0001	0.0001	0.167996	0.0001	0.0563928	0.0001	0.0001	0.0001	0.173732
4	6352105	6357531	-	4930430E12Rik	antisense	4930430E12Rik	havana	7	0.0001	0.0551066	0.0562242	0.0001	0.0001	0.223962	0.110556	0.112686	0.0001	0.223284	0.281468	0.0001
10	100572265	100590424	-	4930430F08Rik	protein_coding	4930430F08Rik	ensembl_havana	10	0.519796	0.471209	0.410911	2.83037	3.51965	1.51693	4.37853	5.01226	4.1594	3.8204	5.04656	2.37903
14	44955215	44961327	-	4930431P03Rik	processed_transcript	4930431P03Rik	havana	10	6.17351	4.17416	5.70443	0.109712	0.730374	0.00302451	0.109616	0.0705485	0.0001	0.000116439	0.0813876	0.170817
7	109752320	109755279	+	4930431P19Rik	transcribed_processed_pseudogene	4930431P19Rik	havana	1	0.0733587	0.880205	0.168473	0.67162	0.719951	0.306495	0.497152	0.619321	0.312551	0.520862	0.229356	0.289486
10	11244790	11281222	-	4930432B10Rik	bidirectional_promoter_lncRNA	4930432B10Rik	havana	3	0.0001	0.770192	0.0562242	0.164518	0.187828	0.0001	0.0001	0.0001	0.0001	0.0001	0.0001	0.0001
7	29558579	29582170	+	4930432E11Rik	transcribed_unitary_pseudogene	4930432E11Rik	havana	9	0.366393	0.110113	0.0001	0.212379	0.0001	0.0001	0.0001	0.145459	0.0001	0.297678	0.0563735	0.0001
8	84148025	84172591	+	4930432K21Rik	protein_coding	4930432K21Rik	ensembl_havana	14	1.09898	0.715185	0.561342	1.64428	1.40806	0.223962	4.80493	3.9406	2.83497	2.7527	2.58868	1.33128
11	58274799	58294290	+	4930438A08Rik	protein_coding	4930438A08Rik	ensembl_havana	4	110.694	102.972	83.3446	3.39808	4.13011	15.9502	0.607608	0.731907	4.82435	0.223284	0.112647	0.810381
1	37329667	37334173	-	4930439A04Rik	antisense	4930439A04Rik	havana	1	0.512911	0.220126	0.224597	0.219324	0.093964	0.0001	0.0001	0.0563928	0.0001	0.0001	0.225194	0.289486
1	54681729	54767525	+	4930444A19Rik	antisense	4930444A19Rik	havana	6	0.683112	1.81213	1.36965	0.61313	0.850491	0.741515	0.444656	1.43186	0.386923	0.688932	1.07948	0.845529
2	144243241	144244850	+	4930444E06Rik	antisense	4930444E06Rik	havana	1	0.58617	0.0001	0.0001	0.0001	0.0001	0.0001	0.221012	0.0001	0.0001	0.0001	0.0001	0.0001
10	18796806	18831931	-	4930444F02Rik	lincRNA	4930444F02Rik	havana	1	0.146617	1.04522	0.112348	2.13754	1.83045	1.56713	10.7143	10.8083	3.18311	8.92745	10.1856	2.14156
10	22066307	22068080	-	4930444G20Rik	protein_coding	4930444G20Rik	ensembl_havana	5	0.415949	0.000100045	0.0001	0.0001	0.0001	0.0001	0.0001	0.132781	0.0001	0.297678	0.0001	0.0001
18	82855894	82870605	+	4930445N18Rik	lincRNA	4930445N18Rik	ensembl	1	0.879204	0.0001	0.112348	0.0549061	0.047032	0.0001	0.055328	0.112686	0.0001	0.0001	0.225194	0.0001
9	108133718	108138568	+	4930447F24Rik	processed_transcript	4930447F24Rik	havana	5	0.293135	0.0001	0.0001	0.438549	0.0001	0.0001	0.055328	0.0001	0.0498345	0.0001	0.0001	0.0001
13	34084155	34113273	-	4930447K03Rik	processed_transcript	4930447K03Rik	havana	1	0.0001	0.0001	0.0001	0.164518	0.23476	0.223962	0.110556	0.112686	0.264924	0.0001	0.0001	0.289486
7	126740629	126742182	+	4930448A20Rik	lincRNA	4930448A20Rik	havana	1	0.0001	0.385146	0.449094	0.164518	0.328624	0.223962	0.165784	0.0563928	0.0001	0.0744945	0.562835	0.115854
13	55775136	55784506	-	4930451E10Rik	antisense	4930451E10Rik	havana	10	0.0001	0.0001	0.0001	0.0549061	0.093964	0.112031	0.221012	0.112686	0.0995691	0.0001	0.0001	0.0001
16	4964289	4978963	+	4930451G09Rik	transcribed_unitary_pseudogene	4930451G09Rik	havana	9	2.27112	1.98034	1.57158	1.09622	1.26726	0.72765	1.27034	2.02664	1.74081	0.595256	1.51949	0.926136
16	64751751	64771162	-	4930453N24Rik	protein_coding	4930453N24Rik	ensembl_havana	9	9.23065	12.8166	15.5465	22.5802	25.1279	20.0357	29.3799	28.1465	33.9191	24.3271	31.6812	29.0517
10	21319088	21342058	-	4930455C13Rik	antisense	4930455C13Rik	havana	1	0.0001	0.0681269	0.0001	0.0729941	0.745979	0.388716	0.7891	0.682131	0.250403	0.277094	0.212871	0.211078
4	142017898	142028997	+	4930455G09Rik	antisense	4930455G09Rik	havana	1	0.58617	0.495159	0.224597	5.42591	4.78716	6.65998	2.59582	2.70216	2.7355	1.71117	2.13849	3.47273
1	40049039	40050369	-	4930456G14Rik	TEC	4930456G14Rik	havana	1	0.146617	0.16512	0.168473	0.548161	0.0001	0.0001	0.0001	0.0001	0.0001	0.0001	0.0001	0.0001
5	100840797	100847168	-	4930458D05Rik	antisense	4930458D05Rik	havana	1	2.10752	1.1288	0.779975	0.125798	0.328624	0.0001	0.055328	0.0001	0.0001	0.0001	0.12272	0.0001
10	96226020	96248867	+	4930459C07Rik	lincRNA	4930459C07Rik	havana	1	0.0001	0.275133	0.224597	0.109712	0.0001	0.0001	0.0001	0.0001	0.0001	0.0001	0.0001	0.0579772
10	84488293	84497436	+	4930463O16Rik	lincRNA	4930463O16Rik	ensembl_havana	2	1.68505	2.5304	0.898088	0.0001	0.047032	0.0001	0.0001	0.112686	0.0001	0.0001	0.0001	0.0001
10	53614369	53615275	+	4930466K18Rik	TEC	4930466K18Rik	havana	1	0.439652	0.440153	0.336845	0.493355	0.140896	0.447823	1.04943	0.7882	0.746118	0.297678	0.844203	0.289486
11	33973961	34098555	-	4930469K13Rik	protein_coding	4930469K13Rik	havana	2	0.0733587	0.16512	0.225167	0.443044	0.235076	0.335892	0.0001	0.0001	0.298507	0.223284	0.0563735	1.10442
4	127474848	127476841	+	4930471C06Rik	lincRNA	4930471C06Rik	havana	7	0.0001	0.0001	0.0001	0.0549061	0.093964	0.223962	0.055328	0.112686	0.149304	0.446467	0.168921	0.405241
2	130543791	130563750	-	4930473A02Rik	antisense	4930473A02Rik	ensembl_havana	13	0.0780477	0.879627	0.0001	0.520534	0.939325	0.416861	0.684987	0.422243	0.522338	0.313403	1.20967	1.1391
12	88434113	88442255	-	4930473H19Rik	antisense	4930473H19Rik	havana	1	0.0001	0.0001	0.0001	0.129002	0.149558	0.0001	0.0001	0.316475	0.0001	0.0001	0.185238	0.0001
12	100076908	100097219	-	4930477G07Rik	lincRNA	4930477G07Rik	havana	1	0.0733587	0.220126	0.0562242	0.0001	0.187828	0.0001	0.165784	0.0001	0.0001	0.0001	0.0001	0.0001
14	69732784	69767114	+	4930480K23Rik	lincRNA	4930480K23Rik	ensembl	7	0.879204	1.15524	1.6277	1.47987	2.62829	0.783616	1.93947	3.03991	1.74081	1.63678	3.15142	0.984013
19	5406740	5422848	+	4930481A15Rik	antisense	4930481A15Rik	havana	8	3.95607	4.67566	2.72249	2.90482	4.27091	2.96627	1.93291	2.08294	2.03922	5.32919	2.36359	1.04189
3	95015625	95020139	+	4930481B07Rik	processed_transcript	4930481B07Rik	havana	1	0.219876	1.04522	0.112348	0.164518	0.375556	0.391858	0.27624	0.450443	0.348242	0.223284	0.506562	0.0001
9	106247960	106249414	+	4930500F10Rik	antisense	4930500F10Rik	havana	2	0.366393	0.179743	0.103904	0.273736	0.229935	0.542384	0.71721	0.964181	0.428481	0.522768	0.56091	0.393847
11	84829178	84830869	+	4930502E09Rik	processed_transcript	4930502E09Rik	havana	1	0.293135	0.0001	0.0001	0.219324	0.0001	0.0001	0.165784	0.112686	0.0001	0.0001	0.337741	0.0001
3	146645193	146651318	-	4930503B20Rik	protein_coding	4930503B20Rik	ensembl_havana	1	0.0001	0.000100317	0.0001	0.46538	0.0001	0.000100415	0.348849	0.927066	0.187961	0.344587	1.45293	0.404738
18	70452212	70472510	-	4930503L19Rik	protein_coding	4930503L19Rik	ensembl_havana	5	2.93045	2.75043	3.9288	10.0296	9.43343	10.4097	19.3851	17.9575	23.624	12.5728	23.3536	17.6526
19	45998137	46013387	+	4930505N22Rik	lincRNA	4930505N22Rik	ensembl	1	0.0001	0.0001	0.0001	0.0001	0.140896	0.167996	0.055328	0.0001	0.0498345	0.0744945	0.168921	0.115854
17	8293366	8311081	-	4930506C21Rik	processed_transcript	4930506C21Rik	havana	1	3.47864	3.30441	2.15049	0.865364	1.06228	2.45025	1.14493	2.61364	2.47783	5.0709	1.73572	1.98435
10	62449489	62451323	+	4930507D05Rik	protein_coding	4930507D05Rik	ensembl	1	0.0001	0.0001	0.0001	0.219324	0.475503	0.0001	0.221789	0.281564	0.0001	0.297678	0.225194	0.0579772
9	72518250	72531859	-	4930509E16Rik	lincRNA	4930509E16Rik	havana	2	0.0001	0.0001	0.0001	0.0549061	0.140896	0.223962	0.331468	0.563028	0.397976	0.0001	0.281468	0.0579772
16	11178176	11192293	+	4930509G22Rik	lincRNA	4930509G22Rik	havana	1	0.0001	0.0001	0.112348	0.274131	0.375556	0.223962	0.341977	0.506736	0.915583	0.495091	0.757149	0.405241
3	104510099	104511314	-	4930509H03Rik	sense_intronic	4930509H03Rik	havana	1	0.0001	0.275133	0.0001	0.109712	0.140896	0.167996	0.0001	0.168979	0.0001	0.520862	0.0001	0.173732
18	57373455	57552398	-	4930511M06Rik	processed_transcript	4930511M06Rik	havana	7	0.0001	0.0001	0.280721	0.0001	0.0001	0.167996	0.662836	0.168979	0.0995691	0.446467	0.0001	0.115854
12	69790288	69840480	+	4930512B01Rik	processed_transcript	4930512B01Rik	ensembl_havana	5	0.0001	0.440153	0.0001	0.0001	0.093964	0.279927	0.055328	0.0563928	0.0001	0.223284	0.0001	0.0001
3	116663732	116664156	+	4930512P04Rik	lincRNA	4930512P04Rik	havana	1	0.0001	0.0551066	0.0001	0.0549061	0.187828	0.112031	0.221012	0.168979	0.199038	0.0001	0.0001	0.0001
8	95806744	95821729	+	4930513N10Rik	antisense	4930513N10Rik	ensembl_havana	9	0.736155	0.221933	0.336845	1.09834	0.70408	1.60264	3.21099	2.3521	2.65927	3.44843	2.27685	1.91076
5	114773737	114774984	-	4930515G01Rik	antisense	4930515G01Rik	havana	1	0.0001	0.110259	0.0001	0.602967	1.03662	1.17668	1.49424	0.621211	1.5436	1.56239	0.451032	0.463118
9	119440278	119444831	-	4930516B21Rik	lincRNA	4930516B21Rik	havana	1	0.0001	0.0001	0.0001	0.328937	0.328624	0.335892	0.165784	0.0001	0.248773	0.148889	0.281468	0.463118
9	31278021	31280993	-	4930517E14Rik	lincRNA	4930517E14Rik	havana	1	0.219876	0.550166	0.0001	0.0549061	0.23476	0.0001	0.111118	0.0001	0.0001	0.0001	0.168921	0.0001
6	91689933	91691609	-	4930517G19Rik	TEC	4930517G19Rik	havana	1	1.39202	0.330139	0.168473	0.164518	0.422488	0.223962	0.221012	0.112686	0.0001	0.0744945	0.281468	0.289486
2	156856616	156857947	-	4930518I15Rik	protein_coding	4930518I15Rik	ensembl	2	2.71067	4.56565	4.54616	2.79521	2.95681	2.18275	3.03764	2.92733	1.4424	3.12467	3.09514	2.66245
3	143017660	143040753	+	4930519L02Rik	lincRNA	4930519L02Rik	havana	1	0.0001	0.0001	0.0001	0.164518	0.422488	0.167996	1.15989	1.01337	0.945056	0.297678	0.450288	0.173732
5	139215469	139216357	-	4930520M14Rik	antisense	4930520M14Rik	havana	1	0.0001	0.0016752	0.0001	0.144815	0.422488	0.447823	0.221012	0.281564	0.185488	0.297678	0.184704	0.0001
9	114368303	114377230	+	4930520O04Rik	processed_transcript	4930520O04Rik	havana	10	0.952463	0.330139	0.39297	3.72692	3.28534	1.67906	16.9551	14.1296	5.57037	9.96897	10.9172	2.48882
5	109735990	109751887	-	4930522L14Rik	protein_coding	4930522L14Rik	havana	9	1.70728	1.23068	2.80631	4.1531	3.96966	4.04751	6.13555	9.95121	8.44583	6.24924	10.7826	6.70023
1	160044382	160080209	+	4930523C07Rik	protein_coding	4930523C07Rik	ensembl_havana	8	95.4123	95.3259	92.1858	45.4221	46.0349	57.1053	59.1789	55.7451	60.9598	56.9806	54.07	47.4919
5	99979061	99979664	+	4930524J08Rik	protein_coding	4930524J08Rik	ensembl	1	0.0001	0.0001	0.112348	0.274131	0.281692	0.335892	0.607608	0.168979	0.149304	0.520862	0.562835	0.694627
9	106891547	106895183	+	4930524O07Rik	antisense	4930524O07Rik	havana	2	0.0001	0.0001	0.0001	0.109712	0.375556	0.391858	0.374448	0.494825	0.733345	0.372073	0.281468	0.339779
13	67796594	67830986	-	4930525G20Rik	antisense	4930525G20Rik	havana	1	0.0001	0.16512	0.112348	0.383743	0.375556	0.615719	0.683564	1.23854	0.746118	0.372073	0.675383	0.694627
17	28075050	28076678	-	4930526A20Rik	transcribed_processed_pseudogene	4930526A20Rik	havana	4	1.2829	0.340425	0.0886556	0.197417	0.420225	0.893778	1.03043	0.520332	0.332702	1.75808	0.596996	1.13745
3	91071662	91075196	+	4930529C04Rik	processed_pseudogene	4930529C04Rik	havana	1	0.0001	0.0783479	0.15294	0.0001	0.204574	0.0844147	0.076395	0.0857549	0.0001	0.114193	0.0001	0.0880418
1	185359461	185362866	-	4930532G15Rik	lincRNA	4930532G15Rik	havana	2	0.0001	0.0001	0.0001	0.274131	0.047032	0.0001	0.110556	0.225271	0.0498345	0.223284	0.225194	0.0001
7	125318359	125319519	+	4930533L02Rik	TEC	4930533L02Rik	ensembl_havana	1	0.0001	0.0551066	0.0001	0.383743	0.328624	0.0001	3.92129	3.20879	1.74081	0.669651	1.57576	0.463118
10	91208258	91220643	-	4930534H03Rik	lincRNA	4930534H03Rik	havana	1	0.0001	0.0001	0.0001	0.0001	0.0001	0.112031	0.110556	0.0001	0.0001	0.372073	0.112647	0.0001
17	28896392	28915325	-	4930539E08Rik	protein_coding	4930539E08Rik	ensembl_havana	5	8.93766	12.4316	11.4494	47.9006	48.0584	33.9151	42.36	37.1534	31.9794	43.2233	41.2486	42.8871
3	135436209	135438666	-	4930539J05Rik	antisense	4930539J05Rik	havana	2	0.146617	1.26525	1.12258	1.20583	0.563284	0.559754	0.994204	1.5763	0.199038	0.223284	1.51949	0.985534
10	67785735	67786694	+	4930543I11Rik	TEC	4930543I11Rik	havana	1	1.09898	1.70653	1.29096	5.28476	4.58295	1.00748	9.59172	7.15191	4.89458	5.79595	7.85395	3.28859
12	90753208	90969799	-	4930544I03Rik	lincRNA	4930544I03Rik	havana	2	0.0001	0.0001	0.0001	0.0001	0.187828	0.0001	0.165784	0.168979	0.248773	0.0001	0.0001	0.0001
2	135169573	135215617	-	4930545L23Rik	antisense	4930545L23Rik	havana	1	0.0001	0.0001	0.0001	0.109712	0.23476	0.0001	0.0001	0.0563928	0.0995691	0.0001	0.0001	0.115854
2	103804452	103810623	-	4930547E08Rik	processed_transcript	4930547E08Rik	havana	1	0.0001	0.0001	0.0001	0.0001	0.140896	0.0001	0.0001	0.0001	0.0001	0.372073	0.0001	0.115854
10	39899329	39907932	+	4930547M16Rik	bidirectional_promoter_lncRNA	4930547M16Rik	havana	2	0.0001	0.0001	0.0001	0.109712	0.047032	0.0001	0.165784	0.168979	0.0001	0.669651	0.394015	0.0579772
5	31485740	31488477	+	4930548H24Rik	protein_coding	4930548H24Rik	ensembl_havana	4	0.0001	0.0121611	0.0001	0.164518	0.140896	0.0001	0.0001	0.0563928	0.0001	0.223284	0.281404	0.0001
12	26346717	26371749	+	4930549C15Rik	antisense	4930549C15Rik	havana	1	0.219876	0.275133	0.39297	0.0001	0.0001	0.0001	0.110556	0.0001	0.0001	0.0001	0.337741	0.0001
9	53402325	53434403	+	4930550C14Rik	protein_coding	4930550C14Rik	ensembl_havana	4	0.0001	0.0001	0.0001	0.0001	0.093964	0.0001	0.165784	0.112686	0.0498345	0.669651	0.0563735	0.0001
2	5037280	5041134	+	4930551O13Rik	antisense	4930551O13Rik	havana	1	0.366393	0.110113	0.449094	0.0001	0.0001	0.0001	0.0001	0.0001	0.0001	0.0001	0.0001	0.0001
19	55640589	55702205	-	4930552P12Rik	lincRNA	4930552P12Rik	ensembl	1	0.0001	0.440153	0.0562242	0.0549061	0.047032	0.0001	0.110556	0.0001	0.0001	0.0744945	0.0001	0.0001
12	99569740	99571415	+	4930556H04Rik	TEC	4930556H04Rik	havana	1	0.0001	0.0001	0.0001	0.767386	0.375556	0.951512	0.27624	0.563028	0.0498345	1.04162	0.619109	0.0001
11	3937541	3976779	-	4930556J24Rik	protein_coding	4930556J24Rik	havana	1	0.0001	0.168143	0.0001	0.0001	0.240333	0.0578475	0.117344	0.0576949	0.0001	0.318556	0.0585937	0.0001
15	10714836	10790124	+	4930556M19Rik	processed_transcript	4930556M19Rik	havana	2	0.0001	0.0001	0.0001	0.328937	0.516352	0.783616	0.773292	0.337857	0.54718	0.520862	0.394015	0.810381
11	88851604	88881396	+	4930556N13Rik	antisense	4930556N13Rik	havana	1	0.0001	0.0001	0.0001	0.164518	0.0001	0.0001	0.055328	0.0563928	0.298507	0.0001	0.112647	0.173732
6	125010173	125049852	-	4930557K07Rik	antisense	4930557K07Rik	havana	1	0.0001	0.059694	0.0590825	0.230268	0.150763	0.447823	0.0001	0.112686	0.0001	0.0001	0.231461	0.463118
1	57359222	57377545	-	4930558J18Rik	lincRNA	4930558J18Rik	havana	2	0.0001	0.0551066	0.0562242	0.328937	0.281692	0.335892	1.15989	0.900786	2.23815	0.967229	1.18184	1.04189
7	39790967	39797743	-	4930558N11Rik	lincRNA	4930558N11Rik	havana	2	0.366393	0.110113	0.0001	0.0001	0.281692	0.0001	0.0001	0.0001	0.0001	0.0744945	0.0001	0.0001
16	4835416	4867687	+	4930562C15Rik	protein_coding	4930562C15Rik	ensembl_havana	16	0.805949	0.825199	0.0562242	0.219324	0.0517101	0.167996	0.441924	0.506736	0.0498345	1.07036	0.42683	0.0001
1	160074735	160077986	-	4930562F07Rik	lincRNA	4930562F07Rik	ensembl_havana	9	6.19768	4.07132	1.54185	0.286415	3.38465	1.54657	2.56623	3.1937	4.73969	1.64254	3.8919	0.951466
11	72215138	72218451	+	4930563E22Rik	processed_transcript	4930563E22Rik	ensembl_havana	4	0.512911	0.27694	0.898088	0.795639	0.46942	0.339541	0.499338	0.682731	0.0995691	0.149665	0.400562	0.0001
10	67568522	67571990	-	4930563J15Rik	lincRNA	4930563J15Rik	havana	1	0.0001	0.0551066	0.0001	0.164518	0.187828	0.112031	0.110556	0.281564	0.0001	0.0001	0.337741	0.463118
16	36880519	36897190	-	4930565N06Rik	antisense	4930565N06Rik	havana	1	3.15022	4.56565	3.9288	8.22102	4.31784	5.9884	6.57223	4.95387	4.92382	6.54682	8.94759	5.96145
5	31486629	31495180	-	4930566F21Rik	antisense	4930566F21Rik	havana	1	0.512911	0.318078	0.0001	0.0001	0.0001	0.0001	0.0001	0.0001	0.0001	0.0001	0.000179166	0.0001
1	34477167	34485934	-	4930568A12Rik	lincRNA	4930568A12Rik	havana	6	0.0001	0.0551066	0.112348	0.712579	0.46942	0.559754	0.662836	0.7882	0.895322	0.446467	0.731656	0.115854
1	193203038	193226209	+	4930570N18Rik	antisense	4930570N18Rik	havana	2	0.0001	0.16512	0.617467	0.548161	0.985672	0.559754	0.55238	0.731907	0.845587	0.297678	0.337741	0.868258
14	48537991	48571889	+	4930572G02Rik	lincRNA	4930572G02Rik	havana	1	0.0001	0.0689881	0.0001	0.0001	0.23476	0.0001	0.0001	0.168979	0.0001	0.0744945	0.124888	0.0001
3	51276759	51278384	+	4930577N17Rik	TEC	4930577N17Rik	havana	2	1.85722	1.50345	1.29131	1.24453	1.07845	1.91405	2.54533	2.84841	2.63922	3.69967	2.71093	1.50696
15	98983348	98996447	+	4930578M01Rik	processed_transcript	4930578M01Rik	havana	2	0.0001	0.0001	0.0001	0.0001	0.0001	0.0001	0.386696	0.39415	0.149304	0.223284	0.0563735	0.463118
8	105859303	105860423	-	4930578M07Rik	processed_transcript	4930578M07Rik	havana	1	0.0001	0.110113	0.0001	0.0001	0.093964	0.0001	0.0001	0.0563928	0.149304	0.0001	0.112647	0.0001
9	89113111	89177888	-	4930579C12Rik	lincRNA	4930579C12Rik	ensembl_havana	9	0.0001	0.16512	0.0001	0.234229	0.0001	0.242487	0.443327	0.337857	0.0001	0.0001	0.618568	0.0001
14	54650511	54654608	+	4930579G18Rik	antisense	4930579G18Rik	ensembl_havana	7	1.6162	1.54193	2.86244	3.29843	3.35022	2.64668	3.12036	3.27742	2.36174	1.94436	2.77119	2.61346
3	79629079	79632821	+	4930579G24Rik	protein_coding	4930579G24Rik	ensembl_havana	9	2.56415	1.87032	4.88291	5.64513	5.30341	7.33157	19.6051	12.2711	17.1088	12.6472	16.2069	11.1704
9	98562229	98563612	-	4930579K19Rik	processed_transcript	4930579K19Rik	ensembl_havana	4	0.0001	0.0001	0.0001	0.438549	0.23476	0.223962	0.165784	0.0001	0.199038	0.446467	0.112647	0.0001
9	35116728	35130923	+	4930581F22Rik	processed_transcript	4930581F22Rik	ensembl_havana	12	24.4832	28.7781	28.5516	25.1177	21.9643	17.3803	19.2726	17.7899	13.9708	18.3083	21.5611	17.8413
5	65493096	65494016	+	4930589O11Rik	TEC	4930589O11Rik	havana	1	0.0733587	0.168524	0.403214	0.109712	0.140896	0.0568055	0.336839	0.398971	0.101846	1.04162	0.342547	0.0001
6	91902809	91950726	+	4930590J08Rik	protein_coding	4930590J08Rik	ensembl_havana	8	0.0001	0.550166	0.168473	0.493355	0.140896	0.223962	0.221012	0.225271	0.199038	0.520862	0.506562	0.405241
1	37485851	37488606	-	4930594C11Rik	TEC	4930594C11Rik	havana	1	0.823101	0.471219	0.837117	0.0001	0.0993277	0.0001	0.315744	0.447974	0.0001	0.636989	0.593105	0.487752
14	122913030	122956344	+	4930594M22Rik	antisense | processed_transcript	4930594M22Rik	havana	1 | 3	0.0001	0.0001	0.0001	0.196797	0.510194	0.284437	0.165784	0.914847	0.200444	0.520862	0.45469	0.115854
1	138977656	138979247	+	4930596I21Rik	sense_intronic	4930596I21Rik	havana	1	0.0001	0.440153	0.0001	0.0549061	0.0001	0.112031	0.0001	0.0001	0.0001	0.0001	0.0001	0.173732
6	66894652	66896522	-	4930597O21Rik	processed_transcript	4930597O21Rik	ensembl_havana	4	0.439652	0.0001	0.0001	0.0549061	0.0001	0.167996	0.497152	0.168979	0.0498345	0.81844	0.0564303	0.0001
6	39118473	39148313	+	4930599N23Rik	antisense	4930599N23Rik	ensembl_havana	4	1.30492	0.36848	0.708358	0.22481	0.347193	0.428824	0.0686215	0.201764	0.0001	0.290953	0.0720987	0.0001
3	136758958	136759961	-	4930599N24Rik	TEC	4930599N24Rik	havana	1	0.512911	0.0001	0.561342	0.219324	0.281692	0.0001	0.110556	0.112686	0.0001	0.0744945	0.281468	0.0001
19	26768801	26823908	-	4931403E22Rik	processed_transcript	4931403E22Rik	havana	1	0.366393	0.275133	0.168473	0.109712	0.23476	0.223962	0.331468	0.168979	0.0498345	0.0744945	0.112647	0.289486
7	43492044	43505941	-	4931406B18Rik	protein_coding	4931406B18Rik	ensembl_havana	10	0.879204	0.605172	0.673591	0.0001	0.0001	0.0001	0.0001	0.0563928	0.0001	0.0001	0.0001	0.0001
9	15283337	15306449	-	4931406C07Rik	protein_coding	4931406C07Rik	ensembl_havana	15	8.20508	12.5966	10.776	19.237	18.1159	17.5732	22.5331	22.7424	22.9772	17.5572	24.8167	20.778
7	34236707	34313552	-	4931406P16Rik	protein_coding	4931406P16Rik	ensembl_havana	13	33.7468	34.4309	28.6736	30.1232	33.7305	29.1546	28.3918	24.5758	28.4995	32.4919	31.7508	31.899
11	75589665	75594772	-	4931413K12Rik	processed_transcript	4931413K12Rik	havana	1	1.90483	1.15524	0.898088	2.19234	2.67522	2.35065	1.49126	1.35113	0.596914	0.892835	2.70123	1.62066
14	54583663	54605994	-	4931414P19Rik	protein_coding	4931414P19Rik	ensembl_havana	5	2.93045	2.36538	3.76042	4.87784	4.45864	3.63785	8.17385	8.44402	8.55444	6.8444	9.62288	7.92928
8	12672186	12679230	+	4931415C17Rik	processed_transcript	4931415C17Rik	ensembl_havana	5	0.805946	0.0551066	0.112348	0.0549061	0.047032	0.0001	0.055328	0.0563928	0.149304	0.0001	0.0563735	0.0001
2	103966943	104028362	-	4931422A03Rik	protein_coding	4931422A03Rik	ensembl_havana	7	0.439652	1.10023	1.51914	0.98661	0.657148	0.223962	0.884706	0.281564	1.14399	0.595256	0.562835	0.347363
8	105280409	105289865	-	4931428F04Rik	protein_coding	4931428F04Rik	ensembl_havana	15	0.117064	0.605172	0.449094	1.15101	2.2059	1.34327	6.84871	5.86092	4.55973	5.05893	5.74	3.58849
1	30997842	31222685	-	4931428L18Rik	protein_coding	4931428L18Rik	ensembl_havana	8	0.293135	1.7053	0.0562242	0.0001	0.0001	0.0001	0.0001	0.0001	0.0001	0.0001	0.0001	0.0001
11	29822395	29825669	-	4931440F15Rik	protein_coding	4931440F15Rik	havana	1	0.0001	0.0001	0.129884	0.466746	0.283649	0.531987	0.132301	0.0001	0.119797	0.0916192	0.267245	0.479071
3	65507257	65529380	-	4931440P22Rik	transcribed_processed_pseudogene	4931440P22Rik	havana	11	0.439652	0.992058	1.90832	2.63691	2.89195	2.08038	2.30122	2.98362	2.54422	3.43332	2.13849	2.66245
9	103557090	103565892	+	4932413F04Rik	antisense	4932413F04Rik	havana	1	0.58617	0.0001	0.112348	0.164518	0.047032	0.0001	0.55238	0.619321	0.199038	0.744045	1.01302	0.810381
5	123138931	123141570	+	4932422M17Rik	lincRNA	4932422M17Rik	havana	1	6.32953	6.18434	8.40993	13.4292	11.7381	7.22451	11.9358	11.9851	7.73362	15.4227	17.2032	9.64591
3	36863104	37053034	+	4932438A13Rik	protein_coding	4932438A13Rik	ensembl_havana	18	366.954	385.985	417.789	177.407	169.66	199.575	256.592	249.376	269.016	214.926	283.34	250.84
16	91053935	91095123	-	4932438H23Rik	protein_coding	4932438H23Rik	ensembl_havana	11	0.0001	0.16512	0.617467	0.109712	0.375556	0.0560654	0.055328	0.346472	0.149304	0.0001	0.112647	0.0001
5	57570082	57720202	-	4932441J04Rik	processed_transcript	4932441J04Rik	havana	3	0.0001	0.15295	0.0001	0.0001	0.187828	0.0001	0.250789	0.371466	0.599505	0.0001	0.0001	0.115854
10	118860826	118863543	+	4932442E05Rik	TEC	4932442E05Rik	ensembl_havana	1	0.0001	0.129229	0.0001	1.07979	0.793615	1.22541	0.816484	0.601511	0.943428	0.456029	0.532322	1.27521
8	4162522	4206883	-	4932443L11Rik	antisense	4932443L11Rik	ensembl_havana	9	0.232704	0.0643481	0.0001	0.166053	0.0001	0.00010121	0.0001	0.189106	0.00166745	0.0001	0.0001	0.0001
13	24905593	24914273	+	4932702P03Rik	antisense	4932702P03Rik	havana	2	0.512911	0.0001	0.0961551	0.655298	0.444589	0.212608	0.595747	0.695972	0.0665437	0.0943212	0.281794	0.128978
1	89650529	89683909	-	4933400F21Rik	processed_transcript	4933400F21Rik	havana	6	0.146617	0.110113	0.0001	0.0001	0.0001	0.223962	0.165784	0.0001	0.0001	0.0001	0.225194	0.0001
1	63754907	63769268	-	4933402D24Rik	protein_coding	4933402D24Rik	ensembl_havana	1	0.0001	0.0001	0.280721	0.0001	0.187828	0.0560654	0.055328	0.0001	0.149304	0.0001	0.0563735	0.0001
13	23278350	23282268	+	4933404K08Rik	lincRNA	4933404K08Rik	havana	1	0.0001	0.0001	0.168473	0.0549061	0.328624	0.0001	0.165784	0.0001	0.0001	0.372073	0.0563735	0.0001
5	136919146	136937113	+	4933404O12Rik	lincRNA	4933404O12Rik	havana	7	2.93045	2.64042	4.26554	6.90567	9.33955	9.90598	39.2119	39.1236	36.5552	30.4275	30.7254	16.7845
12	32919384	32953790	-	4933406C10Rik	lincRNA	4933406C10Rik	havana	7	0.0001	0.110113	0.112348	0.0001	0.23476	0.0001	0.55238	0.675614	0.0498345	0.0001	0.225194	0.173732
7	114315479	114415162	-	4933406I18Rik	lincRNA	4933406I18Rik	havana	3	0.146617	0.385146	0.561342	0.109712	0.0001	0.0001	0.0001	0.0001	0.0001	0.0744945	0.0001	0.0001
1	134385940	134390982	+	4933406M09Rik	protein_coding	4933406M09Rik	ensembl_havana	5	0.0001	0.0001	0.336845	0.822192	0.563284	0.0001	0.221012	0.337857	0.0995691	0.0001	0.0563735	0.0001
10	20310506	20312295	-	4933406P04Rik	lincRNA	4933406P04Rik	ensembl_havana	2	2.71067	0.715185	0.449094	0.274131	0.187828	0.559754	0.718064	0.900786	0.397976	0.372073	1.01302	0.0579772
1	85928483	85940625	+	4933407L21Rik	protein_coding	4933407L21Rik	ensembl_havana	11	0.0001	0.110113	0.112348	0.712579	0.657148	0.559754	0.497152	0.168979	0.0001	0.0001	0.281468	0.173732
18	34579846	34597469	-	4933408B17Rik	protein_coding	4933408B17Rik	ensembl_havana	11	1.83157	2.58541	2.24507	0.164518	0.23476	0.0560654	0.441924	0.168979	0.397976	0.0744945	0.506562	0.289486
19	42052248	42053628	+	4933411K16Rik	protein_coding	4933411K16Rik	ensembl_havana	3	0.732687	0.0551066	0.224597	0.164518	0.375556	0.0001	0.27624	0.506736	0.0995691	0.81844	0.394015	0.347363
10	116949757	116963280	+	4933412E12Rik	bidirectional_promoter_lncRNA	4933412E12Rik	havana	1	0.219876	0.110113	0.336845	1.64428	1.07954	1.56713	3.09287	3.26509	2.43709	2.00875	3.37651	2.25731
13	15781664	15802631	-	4933412O06Rik	lincRNA	4933412O06Rik	havana	1	2.56415	1.43027	1.23483	0.0001	0.0001	0.0001	0.0001	0.0001	0.0001	0.0001	0.0001	0.0001
19	28580533	28583295	-	4933413C19Rik	sense_intronic	4933413C19Rik	havana	1	0.293135	0.0551066	0.0001	0.0549061	0.0001	0.0001	0.165784	0.168979	0.0001	0.223284	0.0001	0.0579772
14	26356574	26400457	+	4933413J09Rik	lincRNA	4933413J09Rik	ensembl_havana	12	0.219876	0.330139	0.0001	0.274131	0.047032	0.167996	0.221012	0.281564	0.149304	0.297678	0.337741	0.231609
5	112640335	112641636	+	4933415J04Rik	TEC	4933415J04Rik	havana	1	0.293135	0.990218	0.673591	1.15103	0.797944	0.559754	0.110556	0.844493	1.19373	0.0001	0.281468	0.347363
8	27142910	27146305	+	4933416M07Rik	antisense	4933416M07Rik	havana	2	0.000101476	0.000101026	0.432809	0.0001	0.132919	0.149464	0.000100143	0.0001	0.0001	0.000221323	0.034242	0.0001
1	160212943	160214817	+	4933417C20Rik	TEC	4933417C20Rik	havana	1	0.0001	0.0001	0.0001	0.219324	0.187828	0.0001	0.0001	0.281564	0.149304	0.446467	0.168921	0.0579772
8	123235091	123242360	+	4933417D19Rik	antisense	4933417D19Rik	havana	1	0.172279	0.0001	0.128102	1.15103	0.306769	0.112718	0.0001	0.337419	0.348242	0.816256	0.111183	1.15764
1	71958998	72005196	-	4933417E11Rik	lincRNA	4933417E11Rik	havana	1	0.0001	0.0001	0.0001	0.274131	0.140896	0.0560654	0.0001	0.0001	0.0001	0.0001	0.0563735	0.0001
4	122961309	122963476	+	4933421A08Rik	processed_transcript	4933421A08Rik	havana	1	0.0001	0.0001	0.0001	0.0001	0.093964	0.0001	0.27624	0.168979	0.149304	0.0001	0.112647	0.0001
4	33027142	33031324	-	4933421O10Rik	processed_transcript	4933421O10Rik	havana	1	1.53853	2.58541	1.90832	3.6173	5.25648	2.51854	4.36311	4.16577	5.07302	4.46377	3.32024	3.76212
2	90479236	90488426	+	4933423P22Rik	antisense	4933423P22Rik	havana	1	0.512911	0.16512	0.112348	0.657773	0.844876	0.671685	0.221012	0.337857	0.348242	0.446467	0.394015	1.15764
4	107783720	107789922	+	4933424M12Rik	lincRNA	4933424M12Rik	havana	2	13.7727	20.6276	14.1995	11.619	8.2132	8.7307	9.8859	9.62618	10.0962	8.1835	11.6487	6.5981
11	57655415	57657827	-	4933426K07Rik	antisense	4933426K07Rik	havana	1	0.0001	0.0001	0.0001	0.109712	0.093964	0.0001	0.27624	0.0563928	0.447711	0.223284	0.337741	0.0579772
11	72153929	72207460	-	4933427D14Rik	protein_coding	4933427D14Rik	ensembl_havana	14	8.05856	7.70103	8.19423	11.2354	8.21319	9.68211	15.1326	17.7886	18.3024	17.4084	18.289	10.0129
5	23815618	23831898	-	4933427G23Rik	transcribed_processed_pseudogene	4933427G23Rik	havana	1	0.0001	0.059606	0.0001	0.115305	0.0498929	0.0001	0.0001	0.407639	0.207235	0.0001	0.0001	0.0001
11	97490783	97500341	-	4933428G20Rik	protein_coding	4933428G20Rik	havana	1	0.0001	0.346352	0.117183	0.0001	0.0001	0.0001	0.126162	0.0622072	0.0001	0.0001	0.0563735	0.0001
10	62577694	62579070	+	4933428P19Rik	antisense	4933428P19Rik	havana	1	0.0001	0.0001	0.0001	0.0001	0.0001	0.179408	0.174631	0.059881	0.0525118	0.0001	0.116395	0.0001
4	62525369	62547994	+	4933430I17Rik	protein_coding	4933430I17Rik	ensembl_havana	1	0.0001	0.0001	0.0001	0.219324	0.047032	0.0001	0.386696	0.281564	0.298507	0.0744945	0.844203	0.810381
7	6136430	6137696	+	4933431C10Rik	TEC	4933431C10Rik	havana	1	0.732687	0.605172	0.561342	1.58948	1.59579	0.951512	1.7674	1.74518	0.795852	0.744045	2.02595	0.63675
3	107888850	107896214	-	4933431E20Rik	antisense	4933431E20Rik	havana	8	0.0001	0.0551066	0.168473	0.219324	0.262252	0.112031	0.643825	1.26638	0.338003	0.693195	0.495987	0.0001
6	72120213	72123198	-	4933431G14Rik	antisense	4933431G14Rik	havana	1	0.732687	2.4754	1.8522	0.98661	0.657148	0.671685	0.055328	0.281564	0.199038	0.0001	0.225194	0.231609
9	85749078	85750430	+	4933431K14Rik	TEC	4933431K14Rik	havana	1	0.219876	0.660179	0.280721	1.59208	1.974	0.895546	2.61893	2.82429	0.853045	1.78986	1.29439	0.520995
8	77610860	77769683	+	4933431K23Rik	processed_transcript	4933431K23Rik	havana	8	0.233559	0.500422	0.0001	0.0001	0.0001	0.0001	0.283536	0.412248	0.150376	0.0001	0.0001	0.0001
14	102987412	103033804	-	4933432I03Rik	lincRNA	4933432I03Rik	havana	1	0.0001	0.275133	0.336845	0.0001	0.093964	0.112031	0.110556	0.0563928	0.0498345	0.0744945	0.225194	0.0001
9	75410184	75417710	+	4933433G15Rik	lincRNA	4933433G15Rik	havana	7	0.0001	0.275133	0.280721	0.0549061	0.047032	0.0001	0.441924	0.225271	0.0001	0.0001	0.0563735	0.115854
13	66996819	67032409	-	4933433G19Rik	antisense	4933433G19Rik	havana	1	1.31876	2.20749	1.68469	2.46638	1.26726	2.41758	1.5483	2.03648	2.13961	2.30633	2.25104	1.28369
3	90051636	90068348	+	4933434E20Rik	protein_coding	4933434E20Rik	ensembl_havana	16	22.9301	30.5288	26.4982	42.4861	38.5236	37.3109	37.6985	37.3971	38.5594	34.6146	39.4099	42.5706
11	59505662	59513648	+	4933439C10Rik	processed_transcript	4933439C10Rik	ensembl_havana	12	2.5103	3.3133	2.54255	3.39007	3.53131	5.20029	9.82064	11.6979	8.02956	6.18104	8.44787	6.51504
1	172538133	172558130	-	4933439K11Rik	processed_transcript	4933439K11Rik	havana	9	0.732687	1.37526	1.8522	0.98661	0.657148	0.615719	0.055328	0.281564	0.0995691	0.372073	0.450288	0.578872
7	125284025	125349789	-	4933440M02Rik	lincRNA	4933440M02Rik	ensembl_havana	2	1.09898	0.990218	1.51545	5.91916	5.8666	2.07082	68.3172	63.4984	49.1379	24.7735	28.0243	4.91966
6	117905808	117907761	-	4933440N22Rik	TEC	4933440N22Rik	ensembl_havana	5	0.820876	0.437982	1.36028	2.3999	2.60236	1.9158	2.99436	2.51352	2.32729	2.43589	1.61589	1.31429
5	23382308	23434270	-	5031425E22Rik	lincRNA	5031425E22Rik	ensembl_havana	3	18.388	17.2722	14.3679	16.0583	17.2242	12.0886	11.598	13.1163	9.35019	9.82018	13.1118	8.73957
2	166447451	166459233	+	5031425F14Rik	lincRNA	5031425F14Rik	havana	1	1.17224	2.69542	3.14306	8.33063	7.41535	5.70857	1.82262	1.18225	2.78523	1.4136	0.675383	4.16726
3	51560035	51567118	+	5031434O11Rik	processed_transcript	5031434O11Rik	havana	7	1.61179	2.69806	1.96634	1.8087	1.22033	0.72765	1.32557	1.24016	0.994791	0.223284	1.35067	1.04189
15	84943936	84988552	-	5031439G07Rik	protein_coding	5031439G07Rik	ensembl_havana	14	45.0542	47.9659	58.1444	251.78	251.171	255.42	120.839	108.25	97.5784	134.653	133.088	209.344
13	38960619	38966606	+	5033403F01Rik	antisense	5033403F01Rik	havana	2	0.0001	0.0001	0.0001	0.0549061	0.140896	0.112031	0.168894	0.0001	0.0001	0.0001	0.281468	0.520995
12	111941991	111944485	-	5033406O09Rik	lincRNA	5033406O09Rik	havana	1	0.659428	0.990218	0.39297	2.46638	3.52	2.29468	4.30789	5.01016	4.87408	4.68696	3.8267	4.80391
1	92908378	92910765	-	5033417F24Rik	antisense	5033417F24Rik	havana	2	0.805946	0.181679	0.401626	0.608627	0.516352	0.281569	0.718064	0.860556	0.702663	0.0001	0.456764	1.68556
6	31108827	31110921	-	5330406M23Rik	TEC	5330406M23Rik	havana	1	0.0001	0.385146	0.0001	0.328937	0.328624	0.112031	0.497152	0.506736	0.397976	0.520862	0.506562	0.0001
7	78818285	78820664	+	5330411O13Rik	lincRNA	5330411O13Rik	havana	1	0.0001	0.0001	0.0001	0.0549061	0.047032	0.0001	0.0001	0.225271	0.199038	0.0001	0.0001	0.0001
3	108455694	108536537	-	5330417C22Rik	protein_coding	5330417C22Rik	ensembl_havana	16	0.0733587	0.275133	0.112348	0.109712	0.047032	0.223962	0.497152	0.337857	0.746118	0.446467	0.168921	0.231609
14	54349462	54351637	-	5330426L24Rik	lincRNA	5330426L24Rik	havana	1	0.58617	2.91545	2.18895	8.22102	7.22763	3.91768	7.06929	7.093	2.13868	4.53817	8.61605	4.86179
10	116509052	116583516	+	5330438D12Rik	processed_transcript	5330438D12Rik	ensembl_havana	8	1.68505	2.20036	1.51545	1.7539	1.97124	1.34327	1.71217	1.35113	0.994791	0.967229	1.01302	1.91005
15	100459740	100468692	-	5330439K02Rik	bidirectional_promoter_lncRNA	5330439K02Rik	havana	1	0.0001	0.0001	0.0001	0.109712	0.047032	0.0001	0.165784	0.168979	0.0001	0.148889	0.168921	0.115854
7	79920723	79922522	+	5430400D12Rik	bidirectional_promoter_lncRNA	5430400D12Rik	havana	2	0.0001	0.0001	0.0001	0.0001	0.047032	0.0001	0.0001	0.0001	0.0498345	0.446467	0.281468	0.0001
12	32096613	32123703	-	5430401H09Rik	lincRNA	5430401H09Rik	havana	1	0.0001	0.275133	0.0562242	0.493355	0.375556	0.0560654	0.165784	0.225271	0.0001	0.0744945	0.0563735	0.0001
6	50566643	50594866	+	5430402O13Rik	antisense	5430402O13Rik	havana	8	0.0001	0.440153	0.0001	0.0549061	0.23476	0.0001	0.331468	0.0563928	0.0001	0.223284	0.0563735	0.347363
5	109674545	109691042	-	5430403G16Rik	protein_coding	5430403G16Rik	havana	2	1.92505	0.779345	1.81755	2.46363	2.87122	2.06184	4.20693	3.19306	4.0262	5.80519	5.48287	2.20382
2	156844351	156862964	-	5430405H02Rik	processed_transcript	5430405H02Rik	havana	8	7.00402	4.98061	6.08597	9.59277	6.87267	4.92469	4.79717	5.16367	1.41491	6.66954	5.79894	5.1824
14	16271089	16271839	+	5430414B19Rik	sense_intronic	5430414B19Rik	havana	1	0.146617	0.550166	0.449094	0.876998	0.797944	0.615719	0.82852	0.39415	0.0498345	0.223284	1.74458	1.44703
5	100420842	100429536	-	5430416N02Rik	lincRNA	5430416N02Rik	havana	7	1.23825	1.15524	1.34451	5.26149	3.4495	5.11307	11.4323	10.6629	11.1406	10.7257	8.44243	6.53062
3	52071589	52073388	-	5430420F09Rik	TEC	5430420F09Rik	havana	1	0.0001	0.0001	0.0562242	0.274131	0.375556	0.223962	0.110556	0.731907	0.0001	1.04162	0.394015	0.578872
8	25302650	25306271	-	5430421F17Rik	lincRNA	5430421F17Rik	havana	1	0.0733587	0.0001	0.0001	0.0001	0.0001	0.112031	0.0001	0.0563928	0.149304	0.148889	0.0563735	0.231609
13	80940411	80948598	+	5430425K12Rik	lincRNA	5430425K12Rik	havana	1	0.293135	0.275133	0.673591	0.164518	0.047032	0.223962	0.055328	0.0001	0.0001	0.372073	0.112647	0.347363
12	91045848	91079908	+	5430427M07Rik	antisense	5430427M07Rik	havana	2	0.0001	0.0001	0.336845	0.0549061	0.140896	0.0001	0.165784	0.0001	0.0995691	0.372073	0.0563735	0.0001
X	85870354	85891500	+	5430427O19Rik	protein_coding	5430427O19Rik	ensembl_havana	4	5.4945	5.61077	6.84726	14.4689	13.4226	14.9429	20.2688	19.6463	17.4569	19.2683	25.9422	20.0835
8	27279441	27281071	+	5430430B14Rik	TEC	5430430B14Rik	havana	1	0.366393	0.16512	0.0001	0.822192	0.891808	0.391858	0.773292	0.39415	0.199038	0.0001	0.675383	0.289486
7	44484517	44485414	+	5430431A17Rik	lincRNA	5430431A17Rik	havana	1	0.0001	0.0001	0.0001	0.767386	0.0001	0.615719	0.27624	0.619321	0.447711	1.56239	0.394015	0.520995
6	83417440	83420993	-	5430434F05Rik	TEC	5430434F05Rik	havana	1	4.8321	4.03042	2.62818	1.1909	2.33034	4.37555	1.64832	2.08803	2.2032	3.26076	2.65112	2.45047
15	5496266	5594985	+	5430437J10Rik	transcribed_processed_pseudogene	5430437J10Rik	havana	2	0.0001	0.0001	0.0001	0.657773	1.26726	0.671685	0.165784	0.0001	0.0001	0.0744945	0.0563735	0.0001
13	40948889	40949632	-	5530402G07Rik	TEC	5530402G07Rik	havana	1	0.0001	0.330139	0.673591	0.493355	0.281692	0.0001	0.0001	0.0001	0.0001	0.223284	0.0001	0.289486
X	105037197	105079610	-	5530601H04Rik	processed_transcript	5530601H04Rik	havana	7	12.7471	11.9915	11.8423	17.8121	13.2349	9.51422	16.9551	17.9012	17.4569	17.8548	19.9209	15.4533
X	13042015	13045298	+	5730405O15Rik	processed_transcript	5730405O15Rik	havana	1	0.512911	0.880205	1.17871	1.09622	1.3142	1.17537	1.21512	0.563028	0.199038	0.223284	0.78793	0.926136
4	126609818	126614372	+	5730409E04Rik	protein_coding	5730409E04Rik	ensembl_havana	4	0.0001	0.220126	0.0001	4.65862	4.27091	2.57451	4.1422	3.88431	4.4762	3.05028	3.43279	3.64637
15	98872644	98874083	+	5730414N17Rik	lincRNA	5730414N17Rik	havana	1	0.0733587	0.550166	0.39297	0.548161	0.187828	0.391858	0.165784	0.506736	0.746118	0.297678	0.562835	0.0001
5	149119565	149184064	-	5730422E09Rik	lincRNA	5730422E09Rik	havana	2	0.366393	0.660179	0.168473	0.328937	0.140896	0.0001	0.165784	0.225271	0.199038	0.520862	0.450288	0.405241
11	80360492	80378035	-	5730455P16Rik	protein_coding	5730455P16Rik	ensembl_havana	15	7.47248	10.1213	9.20449	16.716	19.7116	12.1446	24.9078	25.3319	21.2865	23.9551	27.9119	16.3793
5	48327952	48414295	+	5730480H06Rik	protein_coding	5730480H06Rik	ensembl_havana	8	5.64102	4.51064	2.08411	6.85086	7.09106	4.75716	9.49932	9.51359	8.30577	8.1835	11.2548	6.30872
2	38862163	38865534	+	5730507A11Rik	TEC	5730507A11Rik	havana	1	0.0001	0.110113	0.0001	0.164518	0.563284	0.112031	0.607608	0.619321	0.248773	0.967229	0.731656	0.231609
15	76590120	76591728	+	5730521K06Rik	TEC	5730521K06Rik	havana	1	0.0001	0.125533	0.104917	0.170684	0.221754	0.0812831	0.423378	0.506715	0.43472	0.446467	0.351556	0.543251
11	25602763	26210764	-	5730522E02Rik	protein_coding	5730522E02Rik	ensembl_havana	15	0.0001	0.0001	0.0001	0.109712	0.0001	0.0001	0.055328	0.168979	0.149304	0.0001	0.112647	0.0001
8	25101216	25109987	+	5830408C22Rik	processed_transcript	5830408C22Rik	havana	1	3.93994	2.65617	3.04243	0.548161	0.424745	0.512661	0.221359	0.509185	0.251782	1.34489	0.510082	0.347363
5	64044978	64050229	+	5830416I19Rik	lincRNA	5830416I19Rik	havana	1	3.00371	3.02546	2.80631	0.876998	0.797944	1.00748	1.7674	2.3644	1.19373	4.83575	2.13849	0.694627
3	88775216	88825588	+	5830417I10Rik	unprocessed_pseudogene	5830417I10Rik	havana	8	37.2293	28.9503	30.4806	42.1621	45.8923	54.6454	63.0962	68.8953	73.3508	82.8906	61.7019	60.7142
15	25225503	25225855	-	5830426I08Rik	TEC	5830426I08Rik	havana	1	0.0001	0.715185	0.0001	0.0001	0.0001	0.0001	0.0001	0.0001	0.0001	0.0001	0.0001	0.0001
12	69464787	69475551	-	5830428M24Rik	processed_transcript	5830428M24Rik	havana	1	8.79114	10.8364	6.17377	1.69909	1.3142	0.559754	0.221012	0.281564	0.0498345	0.81844	0.506562	0.347363
7	135635931	135652315	-	5830432E09Rik	antisense	5830432E09Rik	havana	8	35.6771	41.8601	53.6261	11.2631	11.1429	12.9368	7.71875	9.31036	10.3509	6.55817	7.35886	9.69224
4	155398763	155421705	-	5830444B04Rik	processed_transcript	5830444B04Rik	havana	8	40.1159	39.0157	15.4365	37.089	36.1145	12.2583	22.3766	26.1295	14.7516	37.7924	28.4286	12.2471
14	34672465	34673764	-	5830448L01Rik	bidirectional_promoter_lncRNA	5830448L01Rik	havana	1	1.31876	0.770192	1.12258	1.64428	1.22033	0.72765	1.3808	0.731907	1.89001	1.78557	0.562835	1.79429
9	120577331	120578075	+	5830454E08Rik	lincRNA	5830454E08Rik	ensembl_havana	5	0.0001	0.0001	0.224597	0.438549	0.610216	0.223962	0.441924	0.168979	0.0498345	0.297678	0.506562	0.289486
9	110372048	110375431	-	5830462I19Rik	TEC	5830462I19Rik	ensembl_havana	1	0.0001	0.911103	0.546533	1.62681	0.591127	0.951825	0.626012	0.68515	1.14142	0.316395	1.20269	1.16739
9	44179047	44180702	-	5830462O15Rik	TEC	5830462O15Rik	havana	1	0.732687	0.880205	0.336845	0.438549	0.657148	0.783616	0.27624	0.675614	0.795852	0.372073	1.18184	0.694627
5	123366472	123368920	+	5830487J09Rik	processed_transcript	5830487J09Rik	havana	1	0.366393	0.0001	0.0001	0.0549061	0.187828	0.112031	1.60171	0.957078	0.696383	0.372073	1.46321	0.463118
10	37139402	37151316	+	5930403N24Rik	processed_transcript	5930403N24Rik	ensembl_havana	5	1.2455	0.0551066	0.112348	0.0549061	0.422488	0.279927	0.0001	0.0563928	0.0001	0.0001	0.0563735	0.0579772
5	30897300	30899581	+	5930420M18Rik	TEC	5930420M18Rik	havana	1	0.0733587	0.880205	1.17871	0.274131	0.751012	0.615719	0.82852	1.23854	0.646649	1.11602	2.53241	0.752504
8	33428709	33429549	+	5930422O12Rik	protein_coding	5930422O12Rik	ensembl	8	0.366393	0.385146	0.112348	0.109712	0.187828	0.0560654	0.0001	0.0001	0.0001	0.297678	0.112647	0.0001
5	148990056	148995224	-	5930430L01Rik	lincRNA	5930430L01Rik	havana	1	0.366393	0.275133	0.112348	1.69909	1.36113	1.6231	5.30199	6.86783	3.23285	5.80287	5.79627	1.79429
5	43265157	43266369	+	6030400A10Rik	TEC	6030400A10Rik	havana	1	1.68505	2.03534	3.03081	0.602967	0.563284	0.335892	1.21512	0.7882	0.54718	1.19041	2.41986	2.19943
1	132466433	132477065	-	6030442K20Rik	processed_transcript	6030442K20Rik	havana	2	0.341176	1.23269	0.457334	0.65147	0.866412	0.973603	1.40225	1.50618	0.495269	1.3566	0.79456	1.36937
5	22550432	22807851	+	6030443J06Rik	lincRNA	6030443J06Rik	havana	7	1.17224	0.770192	0.505218	0.931804	0.93874	0.391858	1.3808	0.957078	0.596914	0.81844	1.35067	0.694627
15	12808177	12824650	-	6030458C11Rik	protein_coding	6030458C11Rik	ensembl_havana	7	6.37361	8.08607	8.02586	33.2126	28.3001	30.8371	50.2023	44.1338	43.12	43.9674	43.1055	34.9001
14	20687236	20703029	-	6230400D17Rik	antisense	6230400D17Rik	havana	2	1.66499	1.41492	2.42771	3.43571	3.1216	2.5896	2.11757	3.76705	3.03618	3.1416	3.51498	4.58323
11	71031941	71033514	-	6330403K07Rik	lincRNA	6330403K07Rik	ensembl_havana	6	0.0733587	0.110113	0.898088	0.164518	0.187828	0.0001	0.331468	0.225271	0.447711	0.520862	0.225194	0.63675
5	138995056	139000578	+	6330403L08Rik	antisense	6330403L08Rik	ensembl_havana	3	0.0001	0.110113	0.0001	0.109712	0.187828	0.0644276	0.110556	0.112686	0.0995691	0.0001	0.0563735	0.289486
7	80297728	80299617	-	6330403N20Rik	lincRNA	6330403N20Rik	ensembl	1	0.0001	0.16512	0.0001	0.0001	0.0001	0.0001	0.718064	0.619321	0.0498345	0.0001	0.225194	0.520995
2	32732620	32741017	-	6330409D20Rik	protein_coding	6330409D20Rik	ensembl_havana	2	3.07697	4.76281	3.42368	2.41157	2.58136	1.34327	1.32557	2.30811	0.54718	1.11602	2.30732	1.62066
5	138264043	138266662	+	6330418K02Rik	antisense	6330418K02Rik	havana	1	6.02271	7.4323	4.85811	4.68	5.27509	8.14986	3.9551	3.04578	4.79589	3.58376	4.10433	7.71442
8	70766579	70768221	+	6330537M06Rik	TEC	6330537M06Rik	havana	1	0.0001	0.0001	0.224597	1.8087	1.59579	1.79099	1.8785	1.35113	0.646649	1.48799	2.02595	2.48882
3	96606659	96629821	-	6330549D23Rik	transcribed_processed_pseudogene	6330549D23Rik	ensembl_havana	7	0.0001	0.148739	0.154	0.571934	0.311918	0.0001	2.74943	2.03616	1.07895	1.17816	2.13076	2.14162
3	95307076	95315128	-	6330562C20Rik	antisense	6330562C20Rik	ensembl_havana	3	0.146609	0.330139	0.360558	0.931804	1.16347	1.78108	0.994204	2.26631	1.81563	0.446467	1.57576	1.2734
7	92639949	92643784	+	6430511E19Rik	TEC	6430511E19Rik	havana	1	6.30035	4.39289	4.00551	6.18482	3.49201	1.03749	2.33699	2.26064	1.51509	1.73771	2.09047	2.94053
7	139972303	139978756	-	6430531B16Rik	protein_coding	6430531B16Rik	ensembl_havana	11	0.116331	1.94684	0.893565	1.38574	1.36559	0.574896	0.275148	0.464188	0.159092	0.0418944	0.722898	1.05909
8	120114152	120165307	+	6430548M08Rik	protein_coding	6430548M08Rik	ensembl_havana	15	477.283	452.209	379.351	148.798	164.168	137.563	19.606	19.2522	14.9205	20.905	17.2761	61.2341
2	155973279	156007978	-	6430550D23Rik	protein_coding	6430550D23Rik	ensembl_havana	10	0.416543	0.715185	1.01651	0.921856	1.39327	0.696115	1.25317	1.7349	0.463248	0.786734	0.752837	0.454445
13	99396924	99412877	-	6430562O15Rik	processed_transcript	6430562O15Rik	havana	2	0.0001	0.244414	0.0001	0.900829	0.450287	0.552914	2.18187	1.15373	0.94409	0.464861	1.51875	0.802551
9	107340602	107352423	+	6430571L13Rik	protein_coding	6430571L13Rik	ensembl_havana	6	0.0001	0.110113	0.224597	0.0001	0.0001	0.0001	0.0001	0.112686	0.0498345	0.0001	0.112647	0.0001
3	79287173	79289849	+	6430573P05Rik	lincRNA	6430573P05Rik	havana	1	0.58617	0.275133	0.168473	0.219324	0.140896	0.447823	0.386696	0.337857	0.199038	0.446467	0.112647	0.0001
3	40885897	40894194	-	6430590A07Rik	processed_transcript	6430590A07Rik	havana	2	2.05134	2.23093	1.90832	2.87689	3.99041	1.51117	2.78114	3.05987	1.74081	1.85996	3.78129	2.72033
8	25744390	25745581	-	6430710M23Rik	TEC	6430710M23Rik	havana	1	0.0001	0.495159	0.168473	0.219324	0.187828	0.223962	0.110556	0.39415	0.149304	0.223284	0.112647	0.405241
2	29245107	29253007	-	6530402F18Rik	processed_transcript	6530402F18Rik	ensembl_havana	9	121.16	106.245	124.98	39.8381	44.4977	57.6475	31.3597	30.243	40.8927	31.605	29.1209	47.7155
6	28215555	28260863	+	6530409C15Rik	antisense	6530409C15Rik	ensembl_havana	3	1.09898	0.660179	1.14986	1.7906	1.93789	2.6088	2.22995	2.79011	2.04025	1.24357	2.05373	2.15104
7	44970429	44974304	+	6530437J22Rik	antisense	6530437J22Rik	havana	1	0.0001	0.0001	0.0001	0.0001	0.0001	0.0001	0.0001	0.225271	0.149304	0.223284	0.112647	0.0001
13	48532905	48546501	-	6720427I07Rik	lincRNA	6720427I07Rik	havana	3	1.75831	2.09035	1.51545	3.01444	3.29079	2.9103	2.65104	2.70216	2.28789	3.55165	2.9826	0.984013
5	74367163	74369916	-	6720475M21Rik	TEC	6720475M21Rik	havana	1	0.0001	0.0001	0.168473	0.274131	0.140896	0.167996	0.27624	0.506736	0.348242	0.81844	0.281468	0.0001
3	58526930	58528122	+	6720482G16Rik	TEC	6720482G16Rik	havana	1	0.0001	0.0551066	0.0001	0.0001	0.0001	0.0001	0.221012	0.337857	0.0001	0.0744945	0.0001	0.0001
13	62603013	62624183	-	6720489N17Rik	protein_coding	6720489N17Rik	ensembl_havana	7	1.53853	1.67209	3.88602	3.04278	3.77555	5.02479	7.06863	7.45845	10.7396	6.77601	11.4073	11.6166
1	66793645	66796299	-	6820402A03Rik	TEC	6820402A03Rik	havana	1	1.97808	1.37526	1.06646	1.26064	1.3142	0.559754	1.27034	1.18225	0.596914	0.595256	0.844203	0.0579772
8	20262613	20297433	-	6820431F20Rik	transcribed_unprocessed_pseudogene	6820431F20Rik	havana	13	119.59	155.61	169.799	232.534	208.912	228.848	302.866	324.401	269.735	330.009	378.611	295.95
5	8831147	8831448	+	7330423F06Rik	TEC	7330423F06Rik	havana	1	0.0001	0.0001	0.0001	0.109712	0.047032	0.0001	0.27624	0.281564	0.348242	0.744045	0.562835	0.231609
15	83173196	83176446	-	7530414M10Rik	lincRNA	7530414M10Rik	havana	1	0.00759833	0.00160308	0.0001	0.0249764	0.0075744	0.0281231	0.000105892	0.0001	0.346735	0.0001	0.298849	0.00378701
4	63979854	64149925	+	8030451A03Rik	processed_transcript	8030451A03Rik	ensembl_havana	11	0.879204	1.87032	1.23483	1.04142	1.12647	0.447823	1.32557	2.08294	0.696383	1.63678	2.53241	0.578872
6	39527513	39544487	+	8030453O22Rik	processed_transcript	8030453O22Rik	havana	2	6.08057	4.12559	2.63794	7.28931	6.47671	4.3654	5.85427	4.33465	4.1778	7.96032	5.62745	6.3666
18	77633281	77714011	-	8030462N17Rik	protein_coding	8030462N17Rik	ensembl	9	18.9008	24.698	24.358	24.0052	19.5707	22.2184	24.7975	21.4477	22.0822	20.3098	23.3536	21.4726
13	17735985	17737055	-	8430406P12Rik	TEC	8430406P12Rik	havana	1	0.439652	0.715185	0.224597	0.822192	0.422488	1.23134	0.662836	0.450443	0.497445	0.669651	1.0693	1.2734
3	35955436	35956258	-	8430422M14Rik	TEC	8430422M14Rik	havana	1	0.0001	0.16512	0.112348	0.767386	1.40806	0.503789	1.54648	1.23854	1.04453	0.297678	1.35067	0.520995
5	148950250	148951659	+	8430423G03Rik	lincRNA	8430423G03Rik	havana	1	0.0001	0.0001	0.0001	0.109712	0.23476	0.112031	0.883748	0.337857	1.34293	0.446467	1.12557	0.868258
15	81242657	81312867	-	8430426J06Rik	lincRNA	8430426J06Rik	havana	1	0.512911	0.550166	0.0001	0.438549	0.70408	0.0001	0.27624	0.281564	0.0001	0.372073	1.0693	0.0001
11	3452365	3479832	+	8430429K09Rik	processed_transcript	8430429K09Rik	ensembl_havana	8	2.63741	1.7053	2.52569	2.30196	3.33227	1.95889	2.92718	4.27836	2.53656	5.57969	3.77043	2.72033
1	43092588	43093836	+	8430432A02Rik	antisense	8430432A02Rik	ensembl_havana	3	0.0001	0.0001	0.0001	0.219324	0.23476	0.335892	0.165784	0.225271	0.0498345	0.148889	0.0563735	0.0001
17	14978468	14991573	+	9030025P20Rik	protein_coding	9030025P20Rik	ensembl_havana	1	34.0394	44.8521	24.7943	64.9454	62.9224	39.7537	53.0156	62.0229	32.4923	60.8605	62.3523	45.2747
7	120673436	120677571	-	9030407P20Rik	processed_transcript	9030407P20Rik	havana	2	1.61179	1.37526	1.96445	0.602967	1.12647	0.671685	1.27034	1.53376	0.994791	0.744045	1.12557	0.868258
12	24043202	24097247	-	9030624G23Rik	protein_coding	9030624G23Rik	ensembl_havana	4	0.0001	0.163752	0.315467	0.161486	0.152829	0.0001	0.216252	0.0001	0.0001	0.285838	0.126028	0.0001
15	35787154	35790280	+	9130002K18Rik	TEC	9130002K18Rik	havana	1	2.56415	1.32026	2.97468	2.41157	1.83045	2.29468	1.93308	2.42069	2.5863	1.93436	1.80085	3.87787
7	127382260	127387167	-	9130019O22Rik	protein_coding	9130019O22Rik	ensembl_havana	6	5.00439	2.50983	2.40247	4.07665	5.08768	6.61619	6.81888	7.50817	7.68157	4.7591	6.00623	6.90831
6	54269681	54430222	-	9130019P16Rik	processed_transcript	9130019P16Rik	ensembl_havana	10	0.0001	0.0001	0.0001	1.16071	0.328689	0.325733	0.323051	0.609404	0.387008	0.859706	1.33208	0.192044
7	128234458	128238032	-	9130023H24Rik	protein_coding	9130023H24Rik	ensembl_havana	4	8.41872	6.92348	7.73314	5.27631	4.91056	4.63503	11.4647	9.45122	8.18415	7.78971	8.27345	5.42821
1	56971412	57050085	+	9130024F11Rik	processed_transcript	9130024F11Rik	havana	4	0.0001	0.0001	0.0197378	0.164518	0.281692	0.0001	0.938976	0.225271	0.519265	0.297681	0.112647	0.0579772
11	79781979	79872395	-	9130204K15Rik	lincRNA	9130204K15Rik	havana	2	0.0001	0.0001	0.0001	0.0549061	0.23476	0.0001	0.0456408	0.026771	0.544354	0.0001	0.0563735	0.0001
7	105824223	105831516	-	9130208D14Rik	unprocessed_pseudogene	9130208D14Rik	havana	3	0.0001	0.0001	0.0001	0.827877	0.339646	0.0001	0.198328	0.383906	0.0001	0.0001	0.0001	0.0001
11	69120054	69122590	-	9130213A22Rik	protein_coding	9130213A22Rik	ensembl	1	0.0001	0.0001	0.0001	0.164518	0.047032	0.391858	0.110556	0.112686	0.0001	0.0001	0.0563735	0.173732
8	24506430	24508083	+	9130214F15Rik	TEC	9130214F15Rik	havana	1	0.0001	0.0001	0.0001	0.164518	0.46942	0.0001	0.386696	0.225271	0.348242	0.0001	0.0563735	0.173732
7	25228687	25230264	+	9130221H12Rik	antisense	9130221H12Rik	ensembl_havana	2	11.0165	20.3439	11.9405	11.2128	18.4526	15.5666	17.0425	19.7656	18.2895	18.5634	18.4149	20.3739
5	65979358	66004286	-	9130230L23Rik	protein_coding	9130230L23Rik	ensembl_havana	13	0.293135	1.21024	1.29096	0.274131	0.0001	0.0001	0.0001	0.0001	0.0001	0.0001	0.0001	0.0001
11	22858931	22861265	+	9130230N09Rik	processed_transcript	9130230N09Rik	havana	1	2.1246	0.715185	1.57158	0.328937	0.797944	0.839581	0.883748	0.7882	0.397976	1.26481	0.506562	0.694627
15	58022259	58034326	-	9130401M01Rik	protein_coding	9130401M01Rik	ensembl_havana	1	3.51652	1.21024	2.10959	10.0505	10.385	11.1441	13.5649	14.5799	15.6167	12.6082	10.5411	8.68169
5	137502673	137503629	+	9130604C24Rik	lincRNA	9130604C24Rik	havana	1	0.0001	0.16512	0.39297	0.876998	1.07954	0.671685	1.32557	0.957078	0.945056	0.669651	0.506562	0.231609
12	112999964	113001927	+	9230104M06Rik	antisense	9230104M06Rik	ensembl_havana	1	0.0001	0.0001	0.0001	0.167103	0.0482371	0.0001	0.286679	0.0573836	0.0001	0.0001	0.0001	0.0001
10	120389523	120392794	+	9230105E05Rik	antisense	9230105E05Rik	havana	1	13.1134	18.2073	15.1536	1.91831	1.68965	1.06344	2.7615	2.02664	2.28789	5.20772	3.65788	2.14156
2	167782053	167783487	+	9230111E07Rik	lincRNA	9230111E07Rik	havana	1	3.94495	3.24934	2.24507	3.83053	3.54622	1.6231	4.26729	2.28832	1.37112	1.3392	3.8267	1.38915
2	180983924	180987276	+	9230112E08Rik	sense_overlapping	9230112E08Rik	ensembl_havana	3	12.3808	9.51624	11.8158	8.97532	10.9	9.89269	7.77486	7.14929	7.59926	5.80287	7.13932	8.21891
5	52190672	52279035	+	9230114K14Rik	processed_transcript	9230114K14Rik	havana	5	2.05134	5.17072	6.45439	3.94614	2.4875	4.64523	7.06929	7.43076	7.41055	7.21637	7.8784	4.45665
12	79088705	79103940	-	9230116L04Rik	lincRNA	9230116L04Rik	havana	1	0.146617	0.0001	0.0001	0.110289	0.047032	0.407131	0.111389	0.225271	0.402613	0.669651	0.0568908	0.0001
1	136411916	136415520	-	9230116N13Rik	processed_transcript	9230116N13Rik	havana	2	0.0733587	0.0551066	0.224597	3.28847	1.64272	1.6231	2.7615	2.64586	1.93975	2.38072	2.92632	1.38915
16	22511480	22517682	+	9230117E06Rik	antisense	9230117E06Rik	havana	1	0.0001	0.0001	0.0001	0.0001	0.047032	0.167996	0.0001	0.168979	0.0001	0.0001	0.0563735	0.173732
15	98567324	98569584	+	9330020H09Rik	antisense	9330020H09Rik	ensembl_havana	1	0.373062	0.880205	0.512028	0.886334	0.762351	0.73138	1.61883	1.53419	1.51396	1.13287	1.24558	0.932693
7	16871347	16874887	-	9330104G04Rik	lincRNA	9330104G04Rik	havana	2	0.659428	1.04522	1.40321	0.0001	0.140896	0.223962	0.386696	0.731907	0.298507	0.223284	0.562835	0.0579772
13	80962888	81128865	+	9330111N05Rik	antisense	9330111N05Rik	havana	8	110.621	128.66	72.9616	92.0195	80.4884	31.9004	60.8061	59.5016	29.5921	56.0192	77.0386	30.9644
18	89293502	89297230	-	9330132A10Rik	pseudogene	9330132A10Rik	ensembl	3	0.0001	0.0001	0.0001	0.109712	0.23476	0.223962	0.331468	0.450443	0.0001	0.0001	0.112647	0.0001
17	21528194	21535879	-	9330136K24Rik	lincRNA	9330136K24Rik	havana	1	0.0001	0.276583	0.0001	0.0672074	0.38007	0.0647049	0.208288	0.0563928	0.727405	0.892835	0.207093	0.144674
12	69197211	69199868	+	9330151L19Rik	bidirectional_promoter_lncRNA	9330151L19Rik	ensembl_havana	2	3.27681	2.23784	2.43077	11.0076	14.2416	7.99749	10.102	10.5189	7.09321	12.7192	9.57953	6.0237
15	57736563	57738667	-	9330154K18Rik	antisense	9330154K18Rik	havana	10	0.512911	0.770192	0.0001	0.0001	0.0001	0.0001	0.110556	0.0001	0.0001	0.0001	0.0563735	0.0001
9	88840236	88858871	-	9330159M07Rik	processed_transcript	9330159M07Rik	havana	8	6.44445	12.7265	13.9435	15.9514	16.1569	16.0409	40.6762	29.9172	37.8793	17.9903	18.0513	9.33109
11	69057718	69060484	-	9330160F10Rik	antisense	9330160F10Rik	ensembl_havana	2	7.28376	6.6565	4.40049	4.94612	5.24942	3.4706	1.15056	2.96642	1.26188	3.87019	1.26237	3.48891
12	103406822	103407821	-	9330161L09Rik	protein_coding	9330161L09Rik	ensembl	4	0.0733587	0.0001	0.168473	0.109712	0.187828	0.0001	0.221012	0.225271	0.149304	0.148889	0.0563735	0.173732
7	59223847	59254789	-	9330162G02Rik	TEC	9330162G02Rik	havana	1	1.32345	2.10884	3.93507	2.66645	3.9812	3.31919	3.82387	4.24362	3.09466	3.73626	5.06626	3.18749
8	94422898	94435104	-	9330175E14Rik	lincRNA	9330175E14Rik	havana	2	2.34438	2.03534	2.58181	15.9487	16.0978	7.94719	10.1068	11.4275	4.33422	9.89457	10.9172	7.35051
6	127149389	127212412	+	9330179D12Rik	antisense	9330179D12Rik	havana	1	0.0001	0.16512	0.0001	0.109712	0.0001	0.0001	0.222489	0.0721668	0.000100077	0.0744945	0.0709505	0.0001
5	9266118	9481826	+	9330182L06Rik	protein_coding	9330182L06Rik	ensembl_havana	16	0.0001	0.16512	0.0001	0.109712	0.0001	0.0001	0.165784	0.39415	0.0001	0.0001	0.0001	0.520995
5	108360187	108363886	+	9330198I05Rik	lincRNA	9330198I05Rik	havana	1	0.0001	0.110113	0.0001	0.0001	0.047032	0.0001	0.27624	0.225271	0.0001	0.0001	0.0563735	0.0001
8	88174560	88175035	+	9430002A10Rik	lincRNA	9430002A10Rik	ensembl_havana	3	0.0001	0.0001	0.0001	0.0001	0.187828	0.0001	0.441924	0.0563928	0.0001	0.0001	0.0001	0.0001
4	156109982	156127266	+	9430015G10Rik	protein_coding	9430015G10Rik	ensembl_havana	13	6.52013	7.15095	8.36261	13.2632	12.8595	11.7528	32.6399	25.6133	29.9403	20.3842	22.397	21.4726
4	3806635	3808752	-	9430025C20Rik	pseudogene	9430025C20Rik	ensembl	3	1.60829	2.75043	4.43391	2.52118	2.11204	1.23134	0.55238	1.05265	0.895322	0.148889	1.51949	1.793
12	98762048	98762973	+	9430031K09Rik	TEC	9430031K09Rik	havana	1	0.0001	0.330139	0.0001	0.0549061	0.047032	0.223962	0.386696	0.337857	0.447711	0.223284	0.337741	0.347363
1	156026223	156030008	-	9430034N14Rik	TEC	9430034N14Rik	havana	1	0.732687	1.54028	1.73995	2.02793	2.86295	1.4552	2.15399	2.70216	1.79054	1.3392	1.9134	1.04189
9	88595325	88599517	-	9430037G07Rik	lincRNA	9430037G07Rik	havana	7	1.48179	2.60154	4.2157	3.66644	2.81142	4.46577	9.86833	12.969	11.1536	4.28095	7.49115	4.86991
1	191535885	191536893	-	9430037O13Rik	TEC	9430037O13Rik	havana	1	0.0001	0.0001	0.0001	0.164518	0.047032	0.0560654	0.221012	0.675614	0.397976	0.744045	0.78793	0.810381
7	137375574	137410763	-	9430038I01Rik	protein_coding	9430038I01Rik	ensembl_havana	14	4.6154	4.67566	1.6277	11.1805	10.8883	8.33895	10.4934	8.04998	4.87408	10.5641	8.10349	5.0933
1	92933526	92950591	-	9430060I03Rik	antisense	9430060I03Rik	havana	1	0.512911	0.0001	0.172248	0.0001	0.0527659	0.0627366	0.0001	0.0001	0.0001	0.153176	0.180755	0.0001
7	127800094	127802763	-	9430064I24Rik	TEC	9430064I24Rik	havana	1	0.110822	0.374587	0.713748	1.46472	2.68047	0.558996	2.44513	0.830603	0.367147	2.48815	2.14663	0.396603
15	34349051	34357873	-	9430069I07Rik	protein_coding	9430069I07Rik	ensembl_havana	2	0.0001	0.110113	0.0001	0.219324	0.23476	0.0560654	0.0577739	0.175985	0.646649	0.0001	0.225194	0.305781
9	44378633	44379451	-	9430081H08Rik	TEC	9430081H08Rik	havana	1	0.0001	0.110113	0.0562242	0.274131	0.140896	0.0001	0.607608	0.731907	0.646649	0.148889	0.337741	0.347363
5	101703586	101705851	+	9430085M18Rik	lincRNA	9430085M18Rik	havana	1	0.0001	0.0001	0.0001	0.328937	0.328624	0.223962	0.27624	0.337857	0.149304	0.148889	0.0563735	0.115854
8	111128886	111145481	-	9430091E24Rik	processed_transcript	9430091E24Rik	havana	7	0.0733587	0.700323	2.09331	0.917863	1.57958	1.13758	1.61336	1.88592	1.81693	1.10671	1.73458	2.00096
2	32574184	32575685	-	9430097D07Rik	protein_coding	9430097D07Rik	ensembl	3	0.0001	0.0001	0.0001	0.109712	0.0001	0.0560654	0.0001	0.0563928	0.248773	0.0001	0.168921	0.0001
12	77236065	77238664	-	9530018F02Rik	bidirectional_promoter_lncRNA	9530018F02Rik	havana	1	0.805946	0.495159	0.280721	0.822192	0.751012	0.615719	2.00651	1.63259	1.09426	1.78557	1.57576	0.926136
X	48276792	48285427	-	9530027J09Rik	lincRNA	9530027J09Rik	ensembl	1	1.54027	2.39316	0.957027	1.12195	0.818411	0.88407	1.18725	2.90773	0.587691	0.563296	1.90964	1.62746
6	54146887	54150938	-	9530036M11Rik	antisense	9530036M11Rik	havana	1	0.0001	0.0001	0.0001	0.0001	0.0001	0.112031	0.055328	0.281564	0.0995691	0.0001	0.112647	0.0579772
5	117115218	117118724	+	9530046B11Rik	antisense	9530046B11Rik	havana	1	0.0001	0.0001	0.168473	0.164518	0.047032	0.0001	0.497152	0.450443	0.0995691	0.595256	0.168921	0.0001
3	142882495	142892922	+	9530052C20Rik	lincRNA	9530052C20Rik	havana	2	0.0001	0.330139	0.280721	0.0001	0.0001	0.0001	0.055328	0.0563928	0.298507	0.0001	0.112647	0.0579772
7	28129466	28164812	+	9530053A07Rik	protein_coding	9530053A07Rik	ensembl_havana	9	0.366393	0.385146	0.0001	0.274131	0.375556	0.0560654	0.221012	0.337857	0.0498345	0.0001	0.506425	0.0001
2	130523995	130527285	+	9530056E24Rik	TEC	9530056E24Rik	havana	1	0.879204	0.550166	0.224597	0.602967	0.985672	0.671685	1.65694	2.42069	0.397976	1.11602	2.02595	2.08368
5	143397248	143399564	-	9530056K15Rik	TEC	9530056K15Rik	ensembl_havana	6	0.0001	0.0001	0.0562171	0.164498	0.187828	0.112031	0.441924	0.957078	0.497445	0.892835	0.506562	0.289486
6	116199408	116207994	-	9530062K07Rik	bidirectional_promoter_lncRNA	9530062K07Rik	havana	1	0.439652	0.0001	0.0001	0.493355	0.187828	0.0560654	0.110556	0.0563928	0.0498345	0.0001	0.337741	0.0579772
11	52396428	52408729	+	9530068E07Rik	protein_coding	9530068E07Rik	ensembl_havana	13	141.39	166.835	174.66	117.122	113.388	142.712	122.273	108.756	138.957	90.0177	100.617	114.48
9	22411513	22444682	+	9530077C05Rik	protein_coding	9530077C05Rik	ensembl_havana	10	8.8644	12.9762	14.5348	3.45289	1.50192	1.84696	1.86025	1.27631	1.79054	1.78557	1.29439	0.289486
7	92902179	92902873	+	9530078K11Rik	TEC	9530078K11Rik	havana	1	0.0001	0.110113	0.0001	0.657773	0.891808	0.783616	0.497152	0.506736	0.54718	0.669651	0.562835	0.810381
17	23743234	23754066	+	9530082P21Rik	antisense	9530082P21Rik	havana	7	2.89272	1.3489	0.861061	6.8867	7.94271	2.15443	9.49255	7.46914	2.87312	9.46891	11.3635	3.76527
8	13285352	13287467	-	9530085L11Rik	TEC	9530085L11Rik	havana	1	0.293135	0.990218	0.841964	2.35676	2.44056	1.11941	1.21512	2.42069	1.5916	1.56239	1.74458	1.91005
1	195013746	195016449	+	9630010A21Rik	TEC	9630010A21Rik	havana	1	1.02572	1.32026	0.954212	0.548161	0.563284	0.559754	0.0001	0.225271	0.0001	0.148889	0.225194	0.0001
4	109651529	109657854	-	9630013D21Rik	processed_transcript	9630013D21Rik	ensembl_havana	14	0.0001	0.330139	0.336845	0.548161	0.093964	0.112031	0.718064	0.619321	0.248673	0.446467	0.412902	0.405241
11	63964226	63968041	+	9630013K17Rik	antisense	9630013K17Rik	havana	1	0.0001	0.0001	0.0001	0.328937	0.140896	0.0001	0.110556	0.563028	0.248773	0.148889	0.731656	0.347363
14	64116314	64127606	+	9630015K15Rik	antisense	9630015K15Rik	havana	1	0.293135	0.330139	0.0001	0.0549061	0.140896	0.0001	0.0001	0.112686	0.0001	0.0001	0.0563735	0.0001
17	48125605	48146269	-	9830107B12Rik	protein_coding	9830107B12Rik	ensembl_havana	5	70.8114	72.6727	80.5414	3.51185	3.1757	7.23354	0.117228	0.0565835	1.07477	0.659351	0.348558	0.36928
2	129205958	129230580	-	9830144P21Rik	processed_transcript	9830144P21Rik	havana	1	0.155044	1.52712	0.545442	1.01766	1.01255	0.64046	2.15522	2.04602	2.00566	1.41358	1.93068	1.93381
14	26670010	26670508	+	9930004E17Rik	antisense	9930004E17Rik	havana	1	0.0001	0.330139	0.0001	0.109712	0.187828	0.112031	0.221012	0.0563928	0.0001	0.0001	0.0563735	0.0001
14	70154405	70159503	-	9930012K11Rik	protein_coding	9930012K11Rik	ensembl_havana	13	4.39562	5.77579	5.3319	1.26064	0.516352	1.73503	2.04354	2.30811	1.79054	1.48799	1.63203	0.694627
15	60822271	60831794	+	9930014A18Rik	processed_transcript	9930014A18Rik	havana	3	3.4966	0.635507	0.43391	1.69798	2.04383	2.20357	5.44305	4.77254	2.97668	3.36477	1.95461	1.06121
15	34126944	34130689	+	9930017N22Rik	TEC	9930017N22Rik	havana	1	1.17224	2.25537	1.96445	3.39808	3.89545	4.08557	4.63925	5.17904	4.62541	2.97588	5.79627	6.30872
19	29714402	29805990	-	9930021J03Rik	protein_coding	9930021J03Rik	ensembl_havana	15	74.9437	58.4722	77.0027	42.1459	44.3509	48.4661	46.8886	52.1835	62.6652	55.796	59.3126	64.8805
10	41826538	41829122	+	9930024M15Rik	TEC	9930024M15Rik	havana	1	0.439652	0.110113	1.57158	1.09622	1.12647	1.39924	1.27034	1.35113	1.09426	0.520862	1.40694	0.868258
4	124937048	124944657	+	9930104L06Rik	protein_coding	9930104L06Rik	ensembl_havana	17	6.22709	5.64847	6.22989	11.0161	13.4696	7.05174	16.1819	13.5667	12.5332	15.5486	13.7308	9.54984
11	48946150	48979399	-	9930111J21Rik1	protein_coding	9930111J21Rik1	ensembl_havana	10	24.116	22.7364	18.8112	62.3959	61.2827	61.7351	26.1856	27.0365	30.0009	29.6397	42.1807	59.9602
11	49015874	49051243	-	9930111J21Rik2	protein_coding	9930111J21Rik2	ensembl_havana	9	88.2655	100.711	156.496	254.813	237.73	338.958	127.41	157.768	153.344	231.588	252.625	307.117
6	87805472	87806337	-	9930120I10Rik	TEC	9930120I10Rik	havana	1	2.19786	0.935212	1.17871	1.37025	0.610216	0.671685	0.662836	0.563028	0.596914	0.669651	0.95675	1.96793
2	154791402	155051013	+	a	protein_coding	a	ensembl_havana	10	0.0001	0.16512	0.0001	0.383743	0.46942	0.0001	0.55238	0.619321	0.447711	0.148889	0.394015	0.115854
7	45635680	45638766	-	A030001D20Rik	antisense	A030001D20Rik	havana	1	0.0001	0.313968	0.525389	0.109712	0.284913	0.365801	0.223056	0.177305	0.237378	0.25792	0.0563735	0.463118
1	82913325	82914131	+	A030005L19Rik	protein_coding	A030005L19Rik	havana	1	0.0001	0.220126	0.112348	0.0549061	0.0001	0.0001	0.0001	0.0563928	0.0498345	0.0001	0.168921	0.0001
1	193168046	193177833	+	A130010J15Rik	protein_coding	A130010J15Rik	ensembl_havana	7	3.26042	4.47719	3.94942	6.8454	7.39067	6.16038	10.124	10.8716	9.13328	10.7158	10.523	6.56508
10	115394750	115397885	+	A130012E19Rik	TEC	A130012E19Rik	havana	1	0.805946	0.605172	0.39297	0.657773	0.70408	0.447823	0.386696	1.52001	0.696383	1.11602	0.731656	0.752504
8	120101582	120103905	+	A130014A01Rik	bidirectional_promoter_lncRNA	A130014A01Rik	havana	1	12.8204	9.57124	13.975	8.9335	8.30706	6.04436	3.53469	4.16577	2.18842	3.94301	3.88297	2.48882
1	54913845	54916595	-	A130048G24Rik	TEC	A130048G24Rik	havana	1	0.879204	2.25537	1.40321	0.602967	1.0326	0.895546	0.497152	1.23854	0.248773	0.967229	1.51949	0.63675
1	137927251	137930274	+	A130050O07Rik	TEC	A130050O07Rik	ensembl_havana	1	0.0001	0.0001	0.0562242	0.0549061	0.187828	0.335892	0.27624	0.450443	0.248773	1.19041	0.78793	0.231609
15	95787856	95791643	-	A130051J06Rik	antisense	A130051J06Rik	ensembl_havana	1	0.220245	0.0001	0.16867	0.493355	0.939196	0.675145	0.497525	1.18225	0.895322	0.892835	0.619109	0.695905
1	138161820	138167684	-	A130071D04Rik	TEC	A130071D04Rik	havana	1	2.63741	3.13547	2.69406	2.6856	1.87738	1.06344	0.773292	1.29484	1.19373	1.63678	1.74458	2.37307
10	122565023	122569892	-	A130077B15Rik	lincRNA	A130077B15Rik	havana	1	0.0001	0.16512	0.0001	3.89133	5.02182	3.52592	2.09876	2.98362	1.2932	1.48799	3.09514	3.00972
1	191025350	191029782	+	A230020J21Rik	antisense	A230020J21Rik	ensembl_havana	2	0.000100015	0.296482	0.0001	0.0745034	0.230837	0.0001	0.150706	0.195452	0.000100064	1.0493	0.0001	0.0001
9	20868642	20874308	+	A230050P20Rik	protein_coding	A230050P20Rik	ensembl_havana	14	3.29674	1.96858	1.10706	3.86745	1.57722	1.95952	13.9602	15.1763	10.745	10.8007	9.10515	2.69095
7	55962531	55980869	+	A230056P14Rik	processed_transcript	A230056P14Rik	havana	7	0.439652	0.495159	0.21557	1.15752	0.234759	0.615719	1.03683	0.879559	1.0105	1.48799	1.02517	0.529538
10	86020441	86022330	-	A230060F14Rik	antisense	A230060F14Rik	ensembl_havana	2	0.0001	0.0576915	0.0001	0.328937	0.187828	0.336375	0.170095	0.229595	0.155617	0.0766765	0.112647	0.196111
X	20961684	20986738	+	A230072C01Rik	processed_transcript	A230072C01Rik	havana	7	0.219876	0.935212	0.449094	1.53467	0.93874	0.391858	1.82263	1.74518	1.74081	1.3392	1.68831	1.04189
X	151291974	151344847	-	A230072E10Rik	antisense	A230072E10Rik	havana	8	0.0733587	0.0001	0.0001	0.442621	0.406924	0.72765	0.331468	0.675614	0.507424	0.446467	0.283557	0.0001
6	124916863	124925845	+	A230083G16Rik	antisense	A230083G16Rik	ensembl_havana	2	0.0001	0.0001	0.168473	0.164518	0.093964	0.167996	0.0001	0.0001	0.0001	0.0001	0.0001	0.173732
12	111284762	111293989	+	A230087F16Rik	antisense	A230087F16Rik	havana	2	0.0001	0.000100103	0.0001	0.0001	0.0001	0.205177	0.114565	0.281564	0.0001	0.489715	0.0001	0.131924
8	85053160	85060461	-	A230103J11Rik	processed_transcript	A230103J11Rik	havana	7	0.714486	2.05809	0.818997	0.893905	1.45613	1.11727	1.97349	1.42939	1.29511	1.25548	1.4186	2.0003
7	59327318	59331190	-	A230103L15Rik	TEC	A230103L15Rik	havana	1	0.0001	0.0001	0.168473	0.274131	0.281692	0.0001	0.607608	0.112686	0.0498345	0.0001	0.0001	0.0001
13	84219581	84222176	-	A230107N01Rik	antisense	A230107N01Rik	havana	2	0.0001	0.275133	0.280721	0.0001	0.0001	0.167996	0.110556	0.281564	0.0001	0.0001	0.675383	0.0579772
15	101221195	101225187	-	A330009N23Rik	antisense	A330009N23Rik	havana	2	0.952359	0.0001	0.0001	0.0001	0.0001	0.112019	0.165784	0.0001	0.0001	0.0001	0.0001	0.0001
1	194976375	195037905	+	A330023F24Rik	processed_transcript	A330023F24Rik	havana	7	8.74339	9.83239	8.1669	2.21629	1.88032	0.483182	0.205496	0.73415	0.0498345	0.586369	0.327436	0.0001
19	37173843	37196542	+	A330032B11Rik	lincRNA	A330032B11Rik	ensembl	1	0.0001	0.0001	0.0001	0.0001	0.0001	0.0560654	0.165784	0.0563928	0.0498345	0.0001	0.0001	0.289486
14	122103430	122106975	-	A330035P11Rik	lincRNA	A330035P11Rik	havana	2	0.0001	0.440153	0.168473	0.657773	0.891808	0.279927	1.71217	1.52001	1.09426	1.04162	2.02595	1.04189
19	12517915	12596567	-	A330040F15Rik	processed_transcript	A330040F15Rik	havana	2	0.439652	0.275133	0.224597	0.657773	0.516352	1.39924	0.82852	0.957078	0.845587	0.892835	1.01302	0.636749
6	123934426	123982174	-	A330044P14Rik	transcribed_unprocessed_pseudogene	A330044P14Rik	havana	3	0.732687	0.0001	0.0001	0.438549	0.281692	0.0560654	0.0001	0.0001	0.0001	0.0001	0.0563735	0.115854
2	91237146	91238353	+	A330069E16Rik	lincRNA	A330069E16Rik	ensembl	1	0.0001	0.0551066	0.0001	0.0001	0.047032	0.0001	0.055328	0.0563928	0.248773	0.0001	0.0563735	0.0001
4	128755364	128769299	+	A3galt2	protein_coding	A3galt2	ensembl_havana	13	0.0001	0.0001	0.0001	0.109712	0.0001	0.0001	0.221012	0.0001	0.0995691	0.0001	0.112647	0.347363
4	153957237	153961926	+	A430005L14Rik	protein_coding	A430005L14Rik	ensembl_havana	10	3.58978	3.67878	3.41567	6.82921	10.5236	12.3553	18.6945	15.5492	18.3501	13.7529	12.0433	11.3875
6	67115673	67168427	+	A430010J10Rik	processed_transcript	A430010J10Rik	ensembl_havana	3	0.439652	0.110113	0.0562242	0.0001	0.23476	0.0001	0.110556	0.168979	0.0498345	0.372073	0.112647	0.0579772
2	52425012	52434886	+	A430018G15Rik	processed_transcript	A430018G15Rik	havana	7	0.0001	0.440153	0.14625	0.154237	0.188305	0.0560654	0.086627	0.365386	0.146989	0.0001	0.282522	0.033299
9	72011376	72013020	-	A430027C01Rik	TEC	A430027C01Rik	havana	1	0.0001	0.16512	0.0001	0.493355	0.610216	0.279927	1.49126	0.563028	0.248773	0.297678	0.844203	0.115854
10	122756438	122758411	-	A430028G04Rik	TEC	A430028G04Rik	havana	1	0.0001	0.16512	0.143344	0.274131	0.516352	0.0001	0.386696	1.01337	0.248773	0.0001	0.393588	1.09977
5	138622859	138652415	+	A430033K04Rik	protein_coding	A430033K04Rik	ensembl_havana	15	3.68238	3.8148	3.36755	3.6173	3.75466	4.30944	8.39477	9.30365	7.82631	12.0193	9.22895	4.4173
6	8488795	8510431	-	A430035B10Rik	processed_transcript	A430035B10Rik	havana	8	1.97808	1.37526	1.01034	1.15103	2.01818	1.06344	1.93308	0.7882	2.68576	1.19041	1.40694	1.09977
10	128499364	128504243	+	A430046D13Rik	lincRNA	A430046D13Rik	ensembl	1	0.439652	3.90557	3.08693	11.1805	11.6862	7.61139	11.8189	11.6527	8.40524	12.4984	14.8563	12.0964
14	21847578	21856932	+	A430057M04Rik	antisense	A430057M04Rik	ensembl_havana	9	1.22185	0.391544	0.494834	1.36788	0.204044	0.472414	1.30451	0.916041	0.353407	1.66861	0.23582	0.295997
5	107725157	107728802	+	A430072P03Rik	processed_transcript	A430072P03Rik	havana	1	1.46527	1.04522	1.57158	0.438549	0.657148	2.23872	1.32557	1.80147	1.93975	0.0744945	0.562835	0.520995
5	109769407	109796299	-	A430073D23Rik	lincRNA	A430073D23Rik	havana	1	0.0001	0.0001	0.0001	0.109712	0.047032	0.112031	0.055328	0.0001	0.0001	0.0744945	0.168921	0.289486
8	3353415	3390300	+	A430078G23Rik	protein_coding	A430078G23Rik	ensembl_havana	5	20.366	21.1776	20.7661	31.3491	31.867	28.7663	22.6436	20.3781	24.4198	17.1853	27.1802	33.0481
6	86470277	86480831	-	A430078I02Rik	antisense	A430078I02Rik	havana	7	0.439652	0.110113	0.231279	0.219344	0.28455	0.126373	0.169843	0.337857	0.0998145	0.179737	0.454087	0.0001
13	114124348	114151593	-	A430090L17Rik	antisense	A430090L17Rik	havana	1	0.366393	0.0001	0.0001	0.109712	0.0001	0.167996	0.055328	0.0001	0.0995691	0.223284	0.281468	0.0001
19	10740947	10786044	+	A430093F15Rik	processed_transcript	A430093F15Rik	ensembl_havana	8	2.78393	0.825198	1.17871	0.767386	0.797944	0.167996	0.331468	0.450443	0.0001	0.520862	0.225194	0.63675
12	76344525	76345382	-	A430103D13Rik	TEC	A430103D13Rik	havana	1	0.366393	0.110113	0.168473	0.493355	0.844876	0.167996	1.21512	1.52001	1.34293	0.892835	1.01302	0.405241
1	186749396	186752922	+	A430105J06Rik	lincRNA	A430105J06Rik	havana	1	3.80955	2.4754	1.6277	0.383743	0.375556	0.112031	0.497152	0.39415	0.298507	0.0001	0.450288	0.0579772
1	137966531	137969919	+	A430106G13Rik	lincRNA	A430106G13Rik	havana	1	0.512911	0.0001	0.0562242	1.64428	1.22033	0.615719	2.81673	1.99494	0.895322	2.60391	2.92632	1.36139
5	136345884	136350232	-	A430110C17Rik	TEC	A430110C17Rik	havana	1	0.0001	0.275133	0.112348	0.328937	1.07954	0.335892	0.718064	1.46371	1.04453	1.04162	1.12557	0.868258
1	181225986	181228499	+	A430110L20Rik	lincRNA	A430110L20Rik	ensembl_havana	2	1.46527	0.935212	0.280721	2.13754	2.11204	0.783616	1.27034	1.63259	1.04453	2.90149	2.25104	1.09977
13	60483504	60488809	-	A530001N23Rik	lincRNA	A530001N23Rik	havana	1	0.0001	0.0001	0.0562242	1.31545	1.50192	0.279927	1.71217	1.01337	0.696383	3.49664	1.68831	0.463118
8	122760045	122763022	-	A530010L16Rik	lincRNA	A530010L16Rik	havana	1	0.0733587	0.880205	0.449094	19.0726	14.0328	12.8721	10.1068	8.83808	7.46028	10.0434	13.0556	13.3697
2	167691177	167729173	+	A530013C23Rik	lincRNA	A530013C23Rik	ensembl_havana	6	0.58617	0.16512	0.224597	1.04142	0.563284	0.279927	0.221012	0.0001	0.0001	0.0001	0.0001	0.0579772
11	61864568	61868059	-	A530017D24Rik	lincRNA	A530017D24Rik	ensembl_havana	4	4.53652	7.09595	9.26061	16.99	16.0039	12.6481	15.0773	12.8544	14.821	13.2423	15.4191	17.7103
3	121531619	121536207	+	A530020G20Rik	antisense	A530020G20Rik	havana	2	0.0001	0.196419	0.336845	0.602967	0.750951	0.279927	1.54648	1.86291	0.159237	0.372073	0.900477	0.63675
1	85083069	85109854	-	A530032D15Rik	protein_coding	A530032D15Rik	ensembl_havana	7	71.3333	80.5778	65.7186	24.6051	26.9569	25.6246	8.59108	12.212	15.404	10.9285	11.9769	16.1166
1	85105946	85114036	+	A530040E14Rik	antisense	A530040E14Rik	ensembl_havana	11	34.603	45.3271	40.9751	29.1243	35.2587	34.3911	20.9032	14.5025	14.9062	19.5249	20.7234	19.1707
3	104499320	104501608	-	A530041M06Rik	sense_intronic	A530041M06Rik	havana	1	0.0733587	1.10023	1.23483	0.164518	0.093964	0.447823	0.55238	0.450443	0.348242	0.0001	0.225194	0.63675
13	15807243	15827538	+	A530046M15Rik	lincRNA	A530046M15Rik	havana	1	0.512911	0.110113	0.112348	0.0001	0.0001	0.0001	0.0001	0.0001	0.0001	0.0001	0.0001	0.0001
13	15817316	15820680	+	A530058O07Rik	TEC	A530058O07Rik	havana	1	0.219876	0.660179	0.336845	0.0001	0.0001	0.0001	0.0001	0.0001	0.0001	0.0001	0.0001	0.0001
17	48149126	48167276	-	A530064D06Rik	protein_coding	A530064D06Rik	ensembl_havana	15	88.1186	98.0309	98.1836	21.5999	22.7688	34.0854	1.28071	1.48392	2.00135	1.48721	1.4202	8.78229
4	16164110	16266226	+	A530072M11Rik	processed_transcript	A530072M11Rik	havana	1	0.0001	0.275133	0.0001	0.219324	0.140896	0.223962	0.27624	0.506736	0.199038	0.0001	0.394015	0.173732
14	45660770	45668499	-	A530076I17Rik	lincRNA	A530076I17Rik	havana	2	0.0001	0.0001	0.0562242	1.42506	0.657148	1.17537	0.165784	0.168979	0.0498345	1.11602	0.112647	0.405241
9	122885080	122903532	-	A530083I20Rik	processed_transcript	A530083I20Rik	havana	8	0.659428	0.0001	0.321173	0.773817	0.468044	0.113368	0.000100012	0.000100004	0.580717	0.0001	0.892259	0.000100005
1	85717083	85778644	-	A630001G21Rik	protein_coding	A630001G21Rik	ensembl_havana	16	35.3108	38.8347	37.4911	114.874	108.132	77.4004	111.45	113.374	88.9258	112.708	119.188	100.475
8	126839233	126851474	+	A630001O12Rik	lincRNA	A630001O12Rik	havana	1	0.146617	1.6503	1.17871	0.822192	0.93874	1.90292	0.27624	0.675614	0.54718	0.372073	0.225194	0.63675
13	93094833	93098969	+	A630019I02Rik	antisense	A630019I02Rik	havana	1	0.0001	0.0001	0.0001	0.142621	0.00465112	0.277148	0.635275	0.631956	0.0498345	0.148889	1.10054	0.0001
1	171676684	171681981	-	A630035G10Rik	processed_transcript	A630035G10Rik	havana	1	0.0001	0.0001	0.0001	0.328937	0.657148	0.0001	0.331468	0.844493	0.0995691	0.744045	0.95675	0.0001
11	29170909	29173559	-	A630052C17Rik	processed_transcript	A630052C17Rik	havana	1	0.58617	0.110113	0.673591	4.32978	2.3467	2.07082	5.30199	4.95387	2.93444	4.68696	5.68373	4.63028
12	100941742	100949876	+	A630072L19Rik	antisense	A630072L19Rik	havana	2	2.26519	1.72465	1.37637	0.911845	0.496183	1.56563	0.528683	0.591803	0.542333	0.701782	1.09581	0.893164
5	20950989	20956399	+	A630072M18Rik	antisense	A630072M18Rik	havana	1	0.000148399	0.56369	0.00010355	0.384996	0.00126252	0.000102313	0.00120263	1.02075	1.10307	0.000111359	0.347046	0.000100004
1	80747222	80749055	-	A630081D01Rik	TEC	A630081D01Rik	havana	1	0.0001	0.0551066	0.0562242	0.98661	0.657148	0.951512	0.497152	1.91406	0.895322	1.4136	2.53241	1.15764
16	98001310	98082451	-	A630089N07Rik	protein_coding	A630089N07Rik	havana	1	1.40286	1.37526	3.86411	5.43789	4.46577	6.04507	13.7816	17.5712	17.4246	9.46841	16.9426	9.58595
1	75220095	75232103	-	A630095N17Rik	protein_coding	A630095N17Rik	ensembl_havana	2	0.219876	0.220126	0.0562242	0.219324	0.0001	0.0001	0.0001	0.0001	0.0995691	0.0001	0.0563735	0.0001
3	94994410	94997351	-	A730011C13Rik	antisense	A730011C13Rik	havana	1	11.2788	11.8836	8.7844	4.34186	3.33455	4.98713	4.72758	4.61451	3.52212	4.84763	5.17238	3.46556
4	108847399	108848620	-	A730015C16Rik	protein_coding	A730015C16Rik	ensembl	1	0.00010153	0.232775	0.402319	0.694015	0.530235	0.323021	0.176328	0.914118	0.15783	0.414526	0.801249	0.0001
2	130873059	130906397	-	A730017L22Rik	processed_transcript	A730017L22Rik	havana	1	5.19136	3.38742	4.33531	14.8505	15.8571	10.1654	17.2849	18.4154	13.5752	18.9803	16.7303	14.9595
2	129218969	129235605	+	A730036I17Rik	lincRNA	A730036I17Rik	ensembl_havana	11	1.75831	0.880205	1.01034	0.0001	0.0001	0.167996	0.497152	0.281564	0.149304	0.0001	0.0563735	0.0001
14	55559942	55560407	-	A730061H03Rik	protein_coding	A730061H03Rik	ensembl	3	0.070892	0.189331	0.12963	0.00010004	0.0986227	0.0671011	0.0001	0.236549	0.0001	0.0001	0.396574	0.151125
10	127070375	127074797	+	A730063M14Rik	lincRNA	A730063M14Rik	havana	1	0.146617	0.220126	0.0562242	0.657773	0.657148	1.11941	0.82852	1.63259	0.845587	0.297678	0.394015	0.289486
13	40956414	41001152	-	A730081D07Rik	antisense	A730081D07Rik	havana	1	2.71462	1.52188	0.777805	0.678604	0.645275	0.405461	0.257642	0.193215	0.54674	0.758909	0.197438	0.291332
9	122380575	122398802	-	A730085K08Rik	antisense	A730085K08Rik	havana	1	3.57173	2.56557	2.42316	0.627743	0.415662	2.05628	0.109772	0.132619	0.582632	0.0001	0.534029	0.0001
13	32338819	32342644	+	A730091E23Rik	TEC	A730091E23Rik	havana	1	0.0001	0.715185	0.224597	0.438549	0.093964	0.0560654	0.165784	0.168979	0.0001	0.0744945	0.731656	0.0001
13	48513570	48514860	+	A830005F24Rik	protein_coding	A830005F24Rik	ensembl_havana	1	0.0001	0.0001	0.0001	0.109712	0.093964	0.167996	0.110556	0.0001	0.248773	0.148889	0.0001	0.0001
4	4138321	4188704	+	A830012C17Rik	processed_transcript	A830012C17Rik	havana	1	1.31876	0.770192	0.898088	0.164518	0.192086	0.112031	0.0001	0.0590858	0.199038	0.0744945	0.0001	0.0001
9	45954101	45955999	+	A830035O19Rik	antisense	A830035O19Rik	ensembl_havana	1	0.0001	0.120372	0.238864	0.581403	0.299964	1.01092	0.793479	0.555321	0.110135	0.709142	0.54974	0.12786
10	33987216	33995056	-	A830082N09Rik	processed_transcript	A830082N09Rik	ensembl_havana	1	0.0001	0.495159	1.34708	1.15103	1.22033	0.559754	1.15989	1.68889	1.59161	1.4136	2.13849	0.810381
15	86453352	86475099	-	A930001M01Rik	antisense	A930001M01Rik	havana	1	2.63741	1.37526	0.841964	2.24715	2.29977	2.79837	0.938976	1.85776	1.39267	0.669651	2.41986	2.25731
7	90871603	90872781	+	A930002H02Rik	TEC	A930002H02Rik	havana	1	0.512911	0.715185	0.112348	0.274131	0.093964	0.112031	0.165784	0.112686	0.0498345	0.81844	0.0001	0.115854
16	19876567	19884275	-	A930003A15Rik	lincRNA	A930003A15Rik	ensembl_havana	4	0.0001	0.0001	0.0001	0.0549061	0.093964	0.0001	0.165784	0.506736	0.298507	0.0001	0.0001	0.0001
2	18025193	18037738	-	A930004D18Rik	protein_coding	A930004D18Rik	ensembl_havana	2	0.0001	0.0001	0.39297	0.0001	0.187828	0.0001	0.0001	0.0001	0.0001	0.0001	0.0001	0.0579772
4	131878628	131883238	+	A930004J17Rik	TEC	A930004J17Rik	havana	1	9.52373	11.4965	12.4597	18.9082	20.1809	14.719	25.0736	25.3319	19.496	20.533	30.4441	21.0095
3	115881581	115888131	-	A930005H10Rik	processed_transcript	A930005H10Rik	ensembl_havana	11	2.45696	3.38784	1.66636	1.69909	2.66959	1.75765	3.81374	3.15359	3.86361	5.14653	3.28182	2.47602
16	91465025	91470129	+	A930006K02Rik	processed_transcript	A930006K02Rik	havana	2	0.146617	0.550166	0.0562242	0.548161	0.328624	1.84696	2.65104	2.75845	1.2932	2.45512	1.85713	1.2734
9	96705828	96711450	+	A930006L05Rik	antisense	A930006L05Rik	havana	1	0.0001	0.275133	0.224597	0.328937	0.375556	0.0001	0.773292	0.563028	0.397976	0.892835	0.225194	0.0001
19	29486355	29523160	-	A930007I19Rik	lincRNA	A930007I19Rik	ensembl	7	0.366393	1.04522	0.39297	1.42506	1.97124	0.671685	1.65694	1.12596	1.09426	0.595256	1.01302	0.520995
2	57236227	57238509	-	A930012O16Rik	processed_transcript	A930012O16Rik	ensembl_havana	11	0.366393	0.330139	0.0001	0.111245	0.093964	0.559754	0.509018	0.619321	0.248773	1.19041	1.13754	0.423697
13	99007099	99021696	+	A930014D07Rik	lincRNA	A930014D07Rik	havana	1	1.53853	0.440153	0.785839	0.876998	0.563284	0.391858	0.165784	0.619321	0.199038	0.0744945	0.281468	0.173732
13	59557566	59558338	+	A930015P04Rik	TEC	A930015P04Rik	havana	1	0.219876	0.0001	0.0001	0.0001	0.093964	0.0001	0.110556	0.0001	0.0498345	0.669651	0.168921	0.0001
7	19417466	19421418	-	A930016O22Rik	antisense	A930016O22Rik	ensembl_havana	2	0.0939952	0.121282	0.0001	0.336488	0.105994	0.203409	0.871121	0.592785	0.0001	0.764416	0.843299	0.590846
2	146259286	146267161	+	A930019D19Rik	antisense	A930019D19Rik	havana	1	0.0001	0.0551066	0.224597	0.219324	0.328624	0.0001	0.165784	0.39415	0.248773	0.669651	0.506562	0.173732
5	122989354	122998346	+	A930024E05Rik	antisense	A930024E05Rik	ensembl_havana	5	0.439652	2.03534	0.617467	1.69909	2.43372	0.839581	1.65694	2.72077	0.845587	2.82709	1.46321	0.961199
17	69416660	69439305	-	A930029G22Rik	lincRNA	A930029G22Rik	havana	1	0.0001	0.0001	0.0001	0.0771436	0.0639036	0.0001	0.247798	0.0763964	0.0001	0.210956	0.0001	0.136285
7	99900192	99904157	-	A930030B08Rik	TEC	A930030B08Rik	havana	1	0.293135	0.110113	0.224597	0.0001	0.140896	0.0001	0.165784	0.0001	0.0001	0.0001	0.168921	0.0001
10	69209762	69213099	-	A930033H14Rik	protein_coding	A930033H14Rik	havana	1	0.0001	0.0001	0.0001	0.109712	0.140896	0.223962	0.883748	0.731907	0.696383	0.967229	0.450288	0.231609
6	47453776	47454321	-	A930035D04Rik	pseudogene	A930035D04Rik	ensembl	3	0.0001	0.16512	0.0001	0.433941	0.000100001	0.112031	0.386696	0.0563928	0.0001	0.372073	0.000105429	0.289486
11	119448788	119491299	-	A930037H05Rik	processed_transcript	A930037H05Rik	havana	1	1.03675	1.26742	2.26524	3.72666	3.41244	3.85656	3.2195	3.70647	2.33888	2.9838	3.55428	6.15345
14	34759402	34770554	+	A930038B10Rik	lincRNA	A930038B10Rik	havana	2	0.0001	0.0001	0.0001	0.0809479	0.0001	0.0001	0.0001	0.0001	0.366933	0.768308	0.139386	0.0001
5	107630250	107633851	-	A930041C12Rik	antisense	A930041C12Rik	havana	1	0.0001	0.110113	0.112348	0.0549061	0.281692	0.112031	0.055328	0.112686	0.0995691	0.446467	0.0563735	0.0001
8	47675391	47685240	+	AA386476	bidirectional_promoter_lncRNA	AA386476	ensembl_havana	3	0.219876	0.0001	0.224597	0.438549	0.422488	0.503789	1.04943	1.12596	0.746118	0.148889	0.844203	0.347363
11	4918510	4919004	+	AA413626	processed_pseudogene	AA413626	havana	1	0.0001	0.16512	0.0001	0.383743	0.657148	0.391858	0.386696	0.39415	0.497445	0.669651	0.450288	0.694627
X	12936872	12938129	+	AA414768	processed_pseudogene	AA414768	havana	1	0.146617	0.110113	0.280721	1.8087	1.12647	1.17537	0.441924	0.168979	0.348242	0.297678	0.394015	0.926136
11	83291699	83294633	+	AA465934	processed_transcript	AA465934	havana	1	0.0001	0.275133	0.224597	1.04142	0.328624	0.839581	1.15989	1.52001	1.5916	1.97679	1.42917	1.15764
2	122636986	122641192	+	AA467197	protein_coding	AA467197	ensembl_havana	16	78.0931	101.322	87.9476	0.164518	0.563284	3.13416	0.497152	0.112686	0.348242	0.0744945	0.112647	0.0001
7	110057987	110061326	-	AA474408	TEC	AA474408	ensembl_havana	2	0.293135	0.660179	0.505218	0.712579	0.844876	0.783616	1.3808	2.13923	0.54718	1.78557	1.63203	0.578872
2	25327450	25332572	-	AA543186	lincRNA	AA543186	ensembl	1	0.0001	0.0551066	0.0001	0.164518	0.093964	0.112031	0.221012	0.281564	0.0995691	0.0001	0.281468	0.0001
16	17922043	17923209	+	AA914427	TEC	AA914427	havana	1	0.0001	0.110113	0.0001	0.164518	0.23476	0.112031	0.221012	0.225271	0.0001	0.0001	0.337741	0.0001
1	130731976	130744623	+	AA986860	protein_coding	AA986860	ensembl_havana	7	0.293135	0.0551066	0.0562242	0.274131	0.563284	0.335892	0.27624	0.168979	0.447711	0.744045	1.0693	0.347363
15	102338252	102350772	-	Aaas	protein_coding	Aaas	ensembl_havana	8	13.9192	10.8364	10.9443	19.5659	22.3867	20.0917	57.8238	53.5346	56.4985	53.2665	45.4129	37.2151
5	125475814	125517411	+	Aacs	protein_coding	Aacs	ensembl_havana	4	61.8304	55.7767	57.9765	40.8307	45.1956	37.497	34.5729	25.3319	34.6651	24.5503	23.2974	33.4531
13	64275280	64312711	-	Aaed1	protein_coding	Aaed1	ensembl_havana	10	16.4055	18.8597	20.8152	43.9957	47.7859	43.2589	38.1366	40.0667	38.6558	43.7785	53.2493	48.0934
9	63602660	63644589	+	Aagab	protein_coding	Aagab	ensembl_havana	8	47.9113	55.2267	23.1233	76.5641	71.6184	44.6045	65.8871	57.5877	50.232	55.9448	74.3938	48.3276
6	86849517	87003224	+	Aak1	protein_coding	Aak1	ensembl_havana	13	102.709	86.8557	92.7732	82.7574	76.687	86.6904	90.8501	81.8499	92.9039	101.102	81.259	90.9251
7	97550331	97579498	-	Aamdc	protein_coding	Aamdc	ensembl_havana	16	0.879204	1.32026	1.51545	3.06924	3.56693	4.47733	4.47357	5.62938	4.327	4.31498	6.47156	5.20905
1	74279840	74284739	-	Aamp	protein_coding	Aamp	ensembl_havana	13	47.1723	47.4168	37.347	49.5997	53.7373	51.8943	65.8865	59.5694	77.2875	52.7457	54.0791	55.4463
11	116586432	116597681	+	Aanat	protein_coding	Aanat	ensembl_havana	12	0.0001	0.0551066	0.112348	0.0001	0.140896	0.0001	0.110556	0.0563928	0.0498345	0.0001	0.0563735	0.0001
2	156547584	156568973	+	Aar2	protein_coding	Aar2	ensembl_havana	10	8.8644	7.26097	6.95951	13.592	16.6609	15.3346	21.539	16.2687	15.4675	10.3409	13.8997	14.5852
8	111033144	111057665	+	Aars	protein_coding	Aars	ensembl_havana	14	33.9188	39.0548	47.7618	59.2455	60.73	80.0866	123.711	116.301	119.214	121.263	103.432	95.208
17	45506841	45520844	+	Aars2	protein_coding	Aars2	ensembl_havana	8	2.19786	3.52052	3.81655	8.27582	7.55615	5.70857	17.5074	13.3978	12.5332	12.2008	13.562	9.08682
11	101406839	101417616	-	Aarsd1	protein_coding	Aarsd1	ensembl_havana	13	2.97942	3.96034	8.1376	11.9487	11.4197	12.3677	25.4169	22.4031	25.1189	19.2132	19.1632	15.7787
5	76873659	76905515	-	Aasdh	protein_coding	Aasdh	ensembl_havana	16	4.17585	4.78567	4.49004	9.75559	10.2313	7.10771	19.0538	15.931	13.6274	12.7216	17.7825	11.344
9	4294793	4309472	-	Aasdhppt	protein_coding	Aasdhppt	ensembl_havana	11	2.56415	2.97045	3.53593	6.52202	5.30341	7.89123	13.0891	15.0303	14.9702	10.0434	15.3628	8.45016
11	84422855	84513523	-	Aatf	protein_coding	Aatf	ensembl_havana	14	6.52012	5.94081	5.3319	14.1949	14.2674	16.5099	29.05	30.8487	28.9457	23.6576	26.73	17.3054
11	120007313	120047168	-	Aatk	protein_coding	Aatk	ensembl_havana	15	114.869	85.8099	49.9506	55.7379	57.8202	38.7841	47.3857	36.5342	35.3613	34.9656	33.8204	34.8421
9	21526176	21545334	+	AB124611	protein_coding	AB124611	ensembl_havana	13	114.431	117.44	101.642	142.169	132.772	127.099	69.4766	61.4162	52.7686	66.8064	63.9271	80.5656
16	8513429	8621569	+	Abat	protein_coding	Abat	ensembl_havana	12	0.0001	0.0001	0.0001	0.0001	0.0001	0.0001	0.331468	0.337857	0.0001	0.0744945	0.0001	0.0001
4	53030787	53159896	-	Abca1	protein_coding	Abca1	ensembl_havana	4	6.52013	8.47111	5.83702	22.1418	23.7477	15.2787	10.1068	9.68247	7.21161	13.4655	18.1765	12.0964
11	9191942	9684260	+	Abca13	protein_coding	Abca13	ensembl_havana	14	542.041	617.119	622.642	231.885	225.039	260.743	153.424	135.553	240.367	43.6697	58.2432	140.468
7	120203961	120325353	+	Abca14	protein_coding	Abca14	ensembl_havana	15	1.02572	0.0001	0.0001	0.0001	0.0001	0.0001	0.0001	0.0001	0.0001	0.0001	0.0001	0.0001
17	24264259	24351069	-	Abca17	protein_coding	Abca17	ensembl_havana	17	0.96589	0.336708	0.112348	0.606706	0.708418	1.015	0.0001	0.226785	0.152017	0.297678	0.680646	0.0579772
2	25428703	25448541	+	Abca2	protein_coding	Abca2	ensembl_havana	18	88.5698	64.0278	62.0174	93.9379	95.2252	89.2649	149.447	116.639	115.185	149.31	114.292	111.009
17	24351950	24410202	+	Abca3	protein_coding	Abca3	ensembl_havana	16	62.0852	58.262	50.8873	213.851	215.011	164.652	161.327	132.002	116.536	131.769	131.636	184.584
11	110269369	110337717	-	Abca5	protein_coding	Abca5	ensembl_havana	14	0.146617	0.770192	1.29096	1.37025	1.54886	0.839581	1.7674	2.47699	1.69107	1.63678	3.20769	1.85217
11	110176820	110251777	-	Abca6	protein_coding	Abca6	ensembl_havana	13	0.439652	0.880205	0.729715	46.2313	47.1462	25.4643	12.4816	12.5534	8.20629	14.8046	15.9958	19.5047
10	79996494	80015573	+	Abca7	protein_coding	Abca7	ensembl_havana	15	445.701	371.789	290.49	347.897	347.574	258.334	210.144	174.452	178.696	179.662	169.949	271.089
11	110025634	110095979	-	Abca8a	protein_coding	Abca8a	ensembl_havana	15	0.0001	0.0001	0.0001	0.0549061	0.23476	0.0001	0.333738	0.0001	0.0001	0.0001	0.112647	0.0001
11	109932190	109995846	-	Abca8b	protein_coding	Abca8b	ensembl_havana	14	0.0001	0.0551066	0.0001	1.58948	1.83045	0.615719	1.55744	1.32278	0.69748	1.85996	2.05464	1.69848
11	110100749	110168197	-	Abca9	protein_coding	Abca9	ensembl_havana	7	5.78754	6.82091	4.37779	251.696	246.086	208.806	168.5	151.315	147.91	142.614	205.159	212.756
8	123952459	123983123	-	Abcb10	protein_coding	Abcb10	ensembl_havana	8	7.45792	12.0134	11.6159	25.1444	21.1474	21.5424	34.392	26.7194	32.4947	23.0624	19.5809	21.8748
5	8660077	8748576	+	Abcb1a	protein_coding	Abcb1a	ensembl_havana	8	0.0001	0.0001	0.0001	0.589945	0.274094	0.899679	0.063179	0.191702	0.0998174	0.0001	0.398658	0.0001
5	8798147	8866316	+	Abcb1b	protein_coding	Abcb1b	ensembl_havana	9	1.2455	0.935212	0.561342	21.4835	21.123	23.3895	58.8882	59.2986	42.5032	61.2997	81.0848	58.336
5	8893717	8959232	+	Abcb4	protein_coding	Abcb4	ensembl_havana	12	0.0001	0.110113	0.0001	0.780389	0.659996	0.559754	3.67736	4.79644	1.69692	3.34785	6.36001	0.811809
1	75171717	75180393	-	Abcb6	protein_coding	Abcb6	ensembl_havana	15	8.6924	5.70916	6.37606	4.74644	6.22761	2.80661	13.5752	8.67825	10.7216	4.84033	7.59063	6.1277
X	104280657	104413857	-	Abcb7	protein_coding	Abcb7	ensembl_havana	7	33.9189	49.726	61.5123	93.1705	89.781	89.8805	124.097	119.791	126.624	94.4068	138.771	120.327
5	24393663	24410055	+	Abcb8	protein_coding	Abcb8	ensembl_havana	18	2.41764	2.80543	1.57158	16.6064	16.3324	12.4244	46.8887	38.1103	35.4112	29.3859	28.6433	25.4661
5	124061530	124095799	-	Abcb9	protein_coding	Abcb9	ensembl_havana	13	20.073	15.331	7.96974	2.02793	2.3467	3.19013	1.21512	1.74518	2.03922	0.223284	1.46321	0.694627
16	14361558	14475738	+	Abcc1	protein_coding	Abcc1	ensembl_havana	17	21.9777	18.1523	20.3171	43.3517	39.8923	37.6647	48.9873	42.3297	47.4467	29.9068	36.2965	45.781
17	46303221	46328353	-	Abcc10	protein_coding	Abcc10	ensembl_havana	13	13.2599	4.29061	6.90338	20.2236	18.4444	11.6969	21.2077	15.368	13.5279	17.0364	13.2806	15.8006
19	43782192	43840741	+	Abcc2	protein_coding	Abcc2	ensembl_havana	5	7.619	9.95629	10.6076	14.6881	14.2674	13.4318	32.0324	31.7492	28.9456	32.6593	33.6517	25.9291
11	94343295	94392998	-	Abcc3	protein_coding	Abcc3	ensembl_havana	16	6.44686	8.25109	7.29625	27.8965	28.8632	30.3894	4.91539	4.95387	5.52063	5.72848	4.78335	13.7749
14	118482692	118706220	-	Abcc4	protein_coding	Abcc4	ensembl_havana	14	51.9407	46.2057	53.2056	73.4949	67.2532	68.8379	94.4401	90.4633	105.486	81.7603	76.4761	92.4299
16	20331303	20426395	-	Abcc5	protein_coding	Abcc5	ensembl_havana	16	115.016	127.506	133.295	144.469	132.771	109.357	65.3348	57.4751	61.8203	53.0434	63.0264	82.7066
7	46104523	46180034	-	Abcc8	protein_coding	Abcc8	ensembl_havana	10	21.4649	21.0126	25.3121	0.931804	1.64272	1.34327	1.60171	1.29484	1.34293	0.595256	0.506562	2.0258
6	142587862	142702316	-	Abcc9	protein_coding	Abcc9	ensembl_havana	15	0.293135	0.220126	0.0001	0.0001	0.422488	0.0001	0.055328	0.112686	0.0498345	0.0001	0.562835	0.0001
X	73716597	73738535	+	Abcd1	protein_coding	Abcd1	ensembl_havana	14	71.354	62.2128	60.1094	245.585	263.104	212.442	170.709	146.248	142.193	198.335	139.502	242.392
15	91145871	91191800	-	Abcd2	protein_coding	Abcd2	ensembl_havana	9	247.175	285.759	256.095	306.42	313.035	234.887	201.362	186.104	199.038	154.89	203.541	203.728
3	121758774	121815303	-	Abcd3	protein_coding	Abcd3	ensembl_havana	10	12.3808	19.1974	29.0725	23.1283	22.9967	29.27	40.6481	31.6929	42.0259	26.7821	36.4653	32.1221
12	84601464	84617414	-	Abcd4	protein_coding	Abcd4	ensembl_havana	6	7.69226	5.94081	4.60229	18.415	19.3361	12.5923	17.5074	12.1031	10.1957	15.1766	17.8951	15.1061
8	79683462	79711741	-	Abce1	protein_coding	Abce1	ensembl_havana	8	15.9249	18.4273	34.4604	73.8755	76.7806	85.8497	191.804	191.382	183.369	165.669	196.874	129.749
17	35956819	35969762	-	Abcf1	protein_coding	Abcf1	ensembl_havana	15	29.4501	28.6585	32.1585	73.3845	73.824	76.2809	131.278	126.321	127.961	114.568	114.63	100.823
5	24565345	24577468	-	Abcf2	protein_coding	Abcf2	ensembl_havana	10	16.2635	14.5768	20.8222	43.2421	48.0584	46.8991	81.6271	74.0815	81.2663	54.3081	61.7885	61.4657
16	20548577	20561380	+	Abcf3	protein_coding	Abcf3	ensembl_havana	16	15.8972	22.0027	18.914	28.006	32.4301	28.7663	31.3144	30.2294	34.7148	28.1212	29.7688	31.8326
17	31057698	31115778	+	Abcg1	protein_coding	Abcg1	ensembl_havana	6	67.0318	72.5538	54.3284	44.393	45.2425	44.8843	27.3932	25.1067	26.3097	27.7493	30.5004	32.5271
6	58584523	58695677	+	Abcg2	protein_coding	Abcg2	ensembl_havana	13	0.0001	0.220126	0.0001	0.109712	0.140896	0.0001	0.0001	0.112686	0.0995691	0.0001	0.0563735	0.0001
5	104935057	104982719	-	Abcg3	protein_coding	Abcg3	ensembl_havana	14	2.71067	2.86044	1.40321	4.16537	3.14454	7.72332	0.386696	0.281564	0.348242	0.0001	0.450288	0.984013
9	44273188	44288616	-	Abcg4	protein_coding	Abcg4	ensembl_havana	16	0.146617	0.110113	0.168473	0.0549061	0.23476	0.112031	0.55238	0.563029	0.596914	0.223284	0.450288	0.173732
17	84676302	84700334	+	Abcg8	protein_coding	Abcg8	ensembl_havana	15	0.0001	0.0001	0.0001	0.109712	0.047032	0.279927	0.607608	0.563028	0.298507	0.297678	0.225194	0.0001
5	30950066	30955092	+	Abhd1	processed_transcript	Abhd1	ensembl_havana	14	0.201046	0.141831	1.18077	4.47919	1.94563	1.70797	1.21719	3.50664	0.242007	3.89233	2.74281	0.230051
16	45729725	45742956	-	Abhd10	protein_coding	Abhd10	ensembl_havana	17	9.01091	10.1993	12.7144	7.47853	7.48772	8.51726	13.0412	10.4188	11.7697	9.00454	12.6752	8.19646
5	135009152	135012176	+	Abhd11	protein_coding	Abhd11	ensembl_havana	14	5.52744	3.65318	4.01376	23.6157	24.1402	19.9721	35.1422	34.0106	39.0623	23.1157	21.0936	20.1132
5	135012114	135013254	-	Abhd11os	transcribed_unitary_pseudogene	Abhd11os	havana	8	0.113674	0.69254	0.195761	0.608819	0.686984	0.231564	0.522619	0.720771	0.526599	0.969464	0.419325	0.375499
2	150832493	150904742	-	Abhd12	protein_coding	Abhd12	ensembl_havana	15	18.095	12.3766	13.8628	61.6022	65.6578	58.4283	50.313	45.6535	38.6935	47.3151	49.3521	45.5495
12	70154142	70183888	+	Abhd12b	protein_coding	Abhd12b	ensembl_havana	10	1.53853	0.440153	0.336845	0.164518	0.140896	0.0001	0.0001	0.225271	0.0001	0.0001	0.0001	0.0001
8	9977707	9992156	+	Abhd13	protein_coding	Abhd13	ensembl_havana	12	38.9003	41.915	55.8999	39.6797	36.7476	41.5821	36.2296	36.3087	37.5994	29.6091	35.0586	37.3309
9	106440051	106447679	-	Abhd14a	protein_coding	Abhd14a	ensembl_havana	17	0.0001	0.110113	0.112348	3.5625	3.70773	2.68644	13.4757	9.79506	10.7428	10.0434	8.7225	5.44056
9	106447459	106452924	+	Abhd14b	protein_coding	Abhd14b	ensembl_havana	15	0.805946	0.0001	0.591341	5.48209	5.29172	4.20127	8.91447	8.31842	6.1094	11.9898	7.22834	7.81791
11	77515121	77538608	+	Abhd15	protein_coding	Abhd15	ensembl_havana	11	7.17584	7.08225	7.49615	26.8489	28.0544	22.4221	19.5599	16.4155	12.3786	15.7838	17.3665	27.561
17	35089263	35102988	+	Abhd16a	protein_coding	Abhd16a	ensembl_havana	15	31.5013	31.0238	21.8885	28.006	24.8741	24.9607	32.916	23.6993	25.5636	28.3444	21.3278	27.7233
10	80583654	80590342	-	Abhd17a	protein_coding	Abhd17a	ensembl_havana	14	20.7323	18.4273	12.7964	32.5551	32.1016	21.6587	39.93	26.7393	29.5425	32.4361	24.0852	24.0771
19	21653309	21685638	+	Abhd17b	protein_coding	Abhd17b	ensembl	3	17.2892	21.9477	30.3633	41.2143	35.3399	33.1876	62.9048	49.1438	68.2856	45.8271	50.4775	37.7361
7	84109356	84151894	-	Abhd17c	protein_coding	Abhd17c	ensembl_havana	10	15.6042	19.2524	27.501	25.8138	24.1231	28.8783	45.2318	34.395	45.2585	27.4517	31.5696	29.286
3	40846970	40938139	+	Abhd18	protein_coding	Abhd18	ensembl_havana	16	18.6801	17.6397	10.291	16.3003	17.4338	9.52409	12.5433	15.6501	11.1685	20.1777	20.6698	12.9733
7	79273199	79365509	+	Abhd2	protein_coding	Abhd2	ensembl_havana	12	289.666	258.201	243.692	144.195	141.735	163.699	153.258	134.016	185.958	126.768	141.303	184.802
18	10642092	10706772	-	Abhd3	protein_coding	Abhd3	ensembl_havana	16	0.0001	0.0001	0.0001	0.109712	0.140896	0.0001	0.0001	0.0563928	0.54718	0.0001	0.168921	0.0579772
14	54254188	54270638	+	Abhd4	protein_coding	Abhd4	ensembl_havana	13	10.8424	11.9365	11.7862	45.1056	53.3619	42.4219	50.1474	43.2895	44.1146	44.8597	43.162	47.6333
9	122351608	122381525	+	Abhd5	protein_coding	Abhd5	ensembl_havana	16	127.341	151.068	241.888	43.9847	40.603	83.7953	27.0074	22.7787	52.4346	14.507	23.3824	38.3727
14	8002902	8056764	+	Abhd6	protein_coding	Abhd6	ensembl_havana	14	0.0001	0.220126	0.449094	4.43939	5.20956	6.15629	5.19153	5.85455	4.0286	5.87727	7.31566	5.96145
8	71456705	71463656	-	Abhd8	protein_coding	Abhd8	ensembl_havana	9	2.4909	1.87032	1.90832	5.80954	6.05433	7.05174	9.49932	8.10627	8.90258	7.81153	5.40236	6.88749
2	22940073	23040242	-	Abi1	protein_coding	Abi1	ensembl_havana	14	137.351	162.17	162.742	138.27	140.551	157.893	106.624	99.485	114.974	121.075	115.034	128.675
1	60409619	60481159	+	Abi2	protein_coding	Abi2	ensembl_havana	15	0.0733587	0.660179	0.898088	9.48156	6.99297	9.12247	18.0044	18.8582	19.1976	18.2268	21.6092	17.016
11	95830074	95842477	-	Abi3	protein_coding	Abi3	ensembl_havana	15	16.4151	16.0154	7.5756	31.6102	42.9874	31.3729	5.28463	6.51308	3.95771	11.3415	6.1469	3.77724
16	56477878	56690136	+	Abi3bp	protein_coding	Abi3bp	ensembl_havana	15	0.0001	0.0551066	0.0001	0.0001	0.047032	0.0001	0.0001	0.0001	0.149304	0.0001	0.112647	0.173732
2	31688376	31804228	+	Abl1	protein_coding	Abl1	ensembl_havana	16	51.0615	35.7544	29.746	88.1279	89.3115	88.0893	98.5822	87.7052	85.9407	80.1971	76.3632	80.3916
1	156558786	156649569	+	Abl2	protein_coding	Abl2	ensembl_havana	13	21.3916	20.7376	25.9856	43.5162	42.2801	42.5339	60.6956	51.3954	51.4754	42.8175	52.9534	48.8485
19	57032733	57314920	-	Ablim1	protein_coding	Ablim1	ensembl_havana	16	0.0001	0.495159	0.0001	0.0549061	0.23476	0.0001	0.441924	0.0563928	0.54718	0.669651	0.281468	0.0579772
5	35757880	35884974	+	Ablim2	protein_coding	Ablim2	ensembl_havana	17	0.0001	0.0551066	0.224597	0.876998	0.140896	0.223962	0.994204	0.506736	1.09426	0.669651	0.450288	0.231609
2	26842503	26864980	-	Abo	protein_coding	Abo	ensembl_havana	15	2.05134	0.990218	0.729715	0.0001	0.0001	0.0001	0.0001	0.0001	0.0001	0.0001	0.0001	0.0001
11	76416734	76622315	-	Abr	protein_coding	Abr	ensembl_havana	18	301.459	295.058	301.619	317.215	319.74	293.154	224.01	203.553	193.862	192.31	211.306	271.16
15	41864076	41869721	-	Abra	protein_coding	Abra	ensembl_havana	6	0.0001	0.16512	0.224597	0.383743	0.140896	0.112031	0.110556	0.0563928	0.0001	0.0001	0.0001	0.115854
10	18011260	18023289	-	Abracl	protein_coding	Abracl	ensembl_havana	3	17.8752	32.0139	39.7358	24.5106	28.0654	43.7651	32.4894	41.713	46.1538	38.9084	42.0177	40.6185
5	100805192	100820966	-	Abraxas1	protein_coding	Abraxas1	ensembl_havana	18	4.2491	5.99582	5.72477	9.53636	7.97854	6.10033	18.7224	17.0005	17.4072	12.1264	19.2457	10.7653
7	132859225	132885112	+	Abraxas2	protein_coding	Abraxas2	ensembl_havana	19	42.8135	47.5825	45.8535	51.4629	50.6706	49.0908	49.5397	46.6107	52.6692	38.8657	52.3908	53.8258
13	23418361	23423867	-	Abt1	protein_coding	Abt1	ensembl_havana	3	6.08057	3.08047	3.7043	3.67211	5.02182	5.31681	8.50521	9.34471	7.21161	6.54682	6.75293	5.49844
6	88835914	88841985	-	Abtb1	protein_coding	Abtb1	ensembl_havana	11	285.709	252.372	176.737	94.486	102.406	70.6845	43.1332	32.3685	35.9083	37.4206	34.1581	59.0928
2	103566310	103718424	+	Abtb2	protein_coding	Abtb2	ensembl_havana	5	47.1054	40.8699	38.7258	3.23366	2.25284	3.69382	0.386696	0.225271	0.895322	0.446467	0.394015	1.56279
9	44877891	44884398	+	AC061963.1	antisense	AC061963.1	havana	1	0.512911	0.441374	0.225141	0.055249	0.047032	0.0001	0.445128	0.564369	0.0500962	0.0001	0.397876	0.810381
17	56958320	56959425	+	AC073683.1	lincRNA	AC073683.1	havana	1	0.146617	0.0001	0.0001	0.109712	0.047032	0.112031	0.055328	0.0001	0.0498345	0.446467	0.112647	0.0001
16	18681337	18682217	-	AC083895.1	processed_pseudogene	AC083895.1	havana	1	0.0001	0.0001	0.103786	0.0001	0.0001	0.0001	0.271732	0.0001	0.0765225	0.155225	0.0463389	0.0690567
16	18245215	18258322	-	AC084822.2	protein_coding	AC084822.2	havana	1	0.338064	1.2735	0.000913246	0.000100246	0.00011794	0.38629	0.000100258	0.000194206	0.00240708	1.54157	0.000642632	0.000101959
16	32454598	32456150	-	AC087556.1	antisense	AC087556.1	havana	1	0.0001	0.0001	0.0562242	0.0001	0.047032	0.0560654	0.165784	0.168979	0.199038	0.0001	0.0001	0.0001
16	17702927	17703592	+	AC087802.1	processed_pseudogene	AC087802.1	havana	1	0.44809	0.0590302	0.0001	0.118688	0.211655	0.0001	0.0001	0.700784	0.226795	0.0001	0.551774	0.0001
16	17714861	17715140	+	AC087802.2	processed_pseudogene	AC087802.2	havana	1	0.0001	0.0001	0.0001	0.219324	0.0001	0.0001	0.0001	0.112686	0.0001	0.223284	0.112647	0.173732
16	17704343	17705101	+	AC087802.5	processed_pseudogene	AC087802.5	havana	1	0.0001	0.0551066	0.0001	0.164518	0.140896	0.0001	0.27624	0.281564	0.0001	0.0001	0.337741	0.0001
16	20566358	20568509	+	AC087898.2	lincRNA	AC087898.2	havana	1	0.219876	0.660179	0.0001	0.602967	0.657148	0.0001	0.386696	0.168979	0.0498345	0.148889	0.675383	0.578872
16	20565577	20566029	-	AC087898.5	processed_pseudogene	AC087898.5	havana	1	0.0001	0.440153	0.0001	0.0001	0.0001	0.335892	0.055328	0.0001	0.0001	0.0001	0.0563735	0.0579772
16	31157870	31158774	+	AC090430.1	processed_pseudogene	AC090430.1	havana	1	0.0001	0.0001	0.0562242	0.219324	0.140896	0.0001	0.0001	0.281564	0.0001	0.0001	0.112647	0.0001
18	11655420	11657785	-	AC090479.2	antisense	AC090479.2	havana	1	0.0001	1.06366	0.527015	0.884017	1.73658	0.744217	1.64964	1.79046	0.604358	0.744045	1.29075	0.96711
17	83998554	84013409	+	AC091309.2	lincRNA	AC091309.2	havana	1	0.0001	0.0001	0.217853	0.0001	0.0001	0.0001	0.271109	0.0992287	0.0995691	0.0001	0.0563735	0.0001
17	84020663	84026020	-	AC091309.5	lincRNA	AC091309.5	havana	1	0.0001	0.110113	0.617467	0.0001	0.0001	0.0001	0.0001	0.0001	0.0001	0.0001	0.0001	0.0001
17	79257410	79258050	-	AC091332.1	processed_pseudogene	AC091332.1	havana	1	0.293135	0.207473	0.0562242	0.0549061	0.093964	0.0001	0.110556	0.0001	0.0981229	0.0744945	0.213144	0.0001
17	3557824	3559863	+	AC098838.1	lincRNA	AC098838.1	havana	1	0.0001	0.0001	0.0001	0.0001	0.140896	0.112031	0.331468	0.0001	0.298507	0.223284	0.0563735	0.0001
17	22713782	22716938	-	AC098880.2	processed_pseudogene	AC098880.2	havana	1	0.879204	0.715185	1.06646	5.31629	3.42613	2.7424	9.665	10.794	8.2063	11.9032	14.3499	4.68816
16	78560316	78564870	+	AC098883.2	antisense	AC098883.2	havana	1	0.0001	0.495159	0.224597	0.219324	0.281692	0.112031	0.0001	0.39415	0.0001	0.520862	0.0001	0.173732
17	77362353	77363211	-	AC100724.1	processed_pseudogene	AC100724.1	havana	1	0.0001	0.0001	0.000100911	0.0555474	0.0475412	0.112422	0.0001	0.0669948	0.0001	0.342513	0.0569607	0.0001
18	12862429	12865287	+	AC102055.1	antisense	AC102055.1	havana	1	0.0001	0.275133	0.0001	0.109712	0.0001	0.223962	0.055328	0.240224	0.0001	0.148889	0.12391	0.463118
18	15201112	15207792	-	AC102342.1	lincRNA	AC102342.1	havana	1	0.0001	0.880205	0.898088	12.8247	13.9389	5.54067	21.5943	18.9708	15.1691	19.9378	32.3574	19.7941
18	15194782	15214697	+	AC102342.2	lincRNA	AC102342.2	havana	1	4.46888	3.96057	5.16353	76.619	73.3079	43.3173	128.019	117.54	81.3161	99.0936	160.83	105.626
18	30267249	30272134	+	AC102496.1	lincRNA	AC102496.1	havana	1	16.9961	12.4799	15.6107	11.9402	12.7703	19.7546	38.9709	39.0541	36.7358	48.1262	39.0822	26.3167
18	9818784	9820463	+	AC102618.1	TEC	AC102618.1	havana	1	0.0001	0.0001	0.0001	0.109712	0.140896	0.167996	0.0001	0.112686	0.0995691	0.0001	0.0001	0.0001
17	15845280	15846629	+	AC102745.1	processed_pseudogene	AC102745.1	havana	1	0.0001	0.0001	0.115691	0.0001	0.0975744	0.173905	0.0001	0.0577087	0.0001	0.0001	0.0001	0.118455
16	34999301	35023206	-	AC110166.2	antisense	AC110166.2	havana	1	0.0001	0.220126	0.000177427	0.0001	0.0001	0.0001	0.221012	0.0001	0.061022	0.0001	0.168921	0.0001
17	3101143	3101737	-	AC110534.2	processed_pseudogene	AC110534.2	havana	1	0.0001	0.0001	0.0001	0.0001	0.0001	0.112031	0.110556	0.168979	0.0995691	0.148889	0.0001	0.0001
17	3130158	3130513	-	AC110534.4	processed_pseudogene	AC110534.4	havana	1	0.0001	0.0551066	0.0001	0.219324	0.047032	0.0001	0.110556	0.0001	0.0995691	0.0001	0.0563735	0.115854
17	3103175	3114796	-	AC110534.5	transcribed_processed_pseudogene	AC110534.5	havana	1	9.45047	7.97605	11.8423	18.6342	15.0183	14.775	19.606	20.6033	18.6008	15.1022	19.4145	15.1639
16	17531182	17531519	+	AC113006.1	bidirectional_promoter_lncRNA	AC113006.1	havana	1	0.0001	0.0001	0.0001	0.164518	0.093964	0.223962	0.0001	0.225271	0.0001	0.0001	0.0001	0.289486
13	111882396	111884178	-	AC113060.1	processed_pseudogene	AC113060.1	havana	1	7.35081	7.83031	3.97981	4.54161	6.33969	2.60149	3.09153	3.98031	3.42564	4.33099	5.73303	5.23561
14	105199326	105201100	-	AC113125.1	processed_pseudogene	AC113125.1	havana	1	13.6325	7.49249	12.8729	4.48397	3.60488	4.91399	2.97878	3.69163	3.33279	1.23648	3.26087	4.04198
15	79889532	79893121	+	AC113595.1	antisense	AC113595.1	havana	1	1.09898	0.492853	0.729715	1.31919	0.845561	2.12396	2.29588	3.1503	1.54187	4.76359	1.98279	2.46942
18	30608537	30608891	-	AC113953.1	processed_pseudogene	AC113953.1	havana	1	0.0001	0.220126	0.39297	0.113551	0.0001	0.0001	0.110556	0.337857	0.348242	0.297678	1.01302	0.578872
16	21896506	21897117	+	AC114990.3	pseudogene	AC114990.3	ensembl	1	0.000166824	0.61082	0.547668	0.950973	1.41435	0.71857	4.28314	1.75282	1.31258	0.591265	3.00016	0.536577
16	24529394	24530363	+	AC115954.1	processed_pseudogene	AC115954.1	havana	1	40.7732	49.5394	74.8207	56.4889	79.3713	116.232	79.149	130.703	151.39	87.6801	107.329	115.313
18	47112139	47112654	+	AC117239.2	protein_coding	AC117239.2	havana	1	0.0001	0.0206542	0.220472	0.894489	2.1728	1.01004	0.580794	4.26433	3.03217	0.000103326	1.58865	3.18038
17	7352064	7371980	-	AC117241.1	protein_coding	AC117241.1	havana	1	0.620186	0.14526	0.000116039	0.536861	0.321071	0.0001	0.0001	0.098634	0.0001	0.0001	0.0001	0.005994
17	7314888	7315847	-	AC117241.2	processed_pseudogene	AC117241.2	havana	1	0.0001	0.0001	0.0001	0.0001	0.0001	0.683039	0.0001	0.000470285	0.0001	0.0001	0.0001	0.0001
16	36580461	36580715	+	AC117662.3	processed_pseudogene	AC117662.3	havana	1	0.0001	0.211019	0.209012	0.0370124	0.0001	0.0001	0.0001	0.0701191	0.0001	0.0001	0.0656839	0.141964
16	18213649	18215251	+	AC118542.3	lincRNA	AC118542.3	havana	1	0.0001	0.0001	0.0001	0.0001	0.093964	0.0001	0.0001	0.0001	0.0001	0.372073	0.168921	0.0001
17	66094933	66095171	+	AC119957.1	processed_pseudogene	AC119957.1	havana	1	0.0001	0.110113	0.280721	0.328937	0.047032	0.391858	0.607608	0.281564	0.945056	0.148889	0.281468	0.231609
17	16557246	16558044	+	AC121151.1	processed_pseudogene	AC121151.1	havana	1	0.0001	0.0001	0.000171099	0.0228071	0.000100001	0.0001	0.460898	0.0001	0.112186	0.366052	0.000110316	0.0001
17	66005705	66006088	+	AC121299.1	processed_pseudogene	AC121299.1	havana	1	0.0001	0.0551066	0.449094	0.164804	0.141393	0.074261	0.0556291	0.112686	0.0001	0.297678	0.0001	0.115854
16	97801128	97801356	+	AC121560.1	processed_pseudogene	AC121560.1	havana	1	0.0001	0.0001	0.0001	0.0549061	0.0001	0.0001	0.331468	0.112686	0.0001	0.0744945	0.281468	0.0001
18	47414465	47415362	-	AC121783.1	processed_pseudogene	AC121783.1	havana	1	0.0001	0.0001	0.0001	0.0001	0.620956	0.29917	0.362206	0.191472	0.248587	0.176412	0.444132	0.194021
17	17593683	17594777	-	AC121795.2	TEC	AC121795.2	havana	1	0.0001	0.495159	0.0001	0.328937	0.140896	0.0001	0.055328	0.225271	0.0498345	0.223284	0.281468	0.0579772
16	44803545	44805505	-	AC122217.1	processed_pseudogene	AC122217.1	havana	1	1.09898	1.04522	1.45933	0.876998	0.46942	0.783616	0.203833	0.112686	0.199038	0.669651	0.562835	1.21552
16	44800674	44801650	-	AC122217.3	processed_pseudogene	AC122217.3	havana	1	0.366393	0.935212	1.57158	0.931804	1.78352	0.951941	0.44204	0.337857	0.397976	0.669651	0.168921	0.520995
17	79933512	79934573	-	AC122253.2	processed_pseudogene	AC122253.2	havana	1	1.67982	0.0001	0.762988	1.2885	1.88554	2.8387	0.982661	2.64722	2.06765	1.46076	2.12654	1.36968
17	80054026	80054557	+	AC122253.3	processed_pseudogene	AC122253.3	havana	1	0.0001	0.0001	0.303871	0.0662234	0.108679	0.0001	0.198436	0.187883	0.0001	0.0001	0.0615722	0.0001
18	17828819	17829021	+	AC122306.1	processed_pseudogene	AC122306.1	havana	1	0.0001	0.46443	0.000764568	0.464325	0.21231	1.43749	1.91218	1.93057	1.95791	1.84716	1.50533	0.0836163
10	92717508	92723689	-	AC122335.1	TEC	AC122335.1	havana	1	0.751479	0.935212	0.281189	1.64428	1.3142	1.29025	3.82193	2.47699	2.45069	1.34665	1.90414	2.37307
17	6948446	6957197	+	AC122413.1	antisense	AC122413.1	havana	1	0.000137624	0.504054	0.0261643	0.114303	1.73691	0.421862	1.44544	1.08861	1.76558	1.0394	0.000100803	0.668433
17	82409935	82410820	-	AC122453.1	processed_pseudogene	AC122453.1	havana	1	0.0001	0.0853808	0.0972647	0.171507	0.394621	0.193877	0.000119701	0.334732	0.482045	0.099473	0.492788	0.262009
17	69382204	69384209	-	AC122487.1	lincRNA	AC122487.1	havana	1	0.0001	0.0001	0.0562242	0.0772815	0.150449	0.449161	0.0729043	0.0001	0.0702094	0.0001	0.0001	0.0001
16	76548795	76551225	+	AC122509.1	lincRNA	AC122509.1	havana	1	0.0001	0.0001	0.0001	0.0549061	0.0001	0.335892	0.0001	0.281564	0.497445	0.223284	0.112647	0.0001
17	87529503	87530745	-	AC122818.1	lincRNA	AC122818.1	havana	1	0.0001	0.16512	0.0001	0.109712	0.140896	0.112031	0.27624	0.0563928	0.0001	0.0001	0.112647	0.0001
17	87559177	87571655	-	AC122818.2	lincRNA	AC122818.2	havana	1	0.732687	0.0001	0.0001	0.0001	0.0001	0.0001	0.0001	0.0001	0.0001	0.0001	0.0001	0.0001
17	87454969	87460365	-	AC122818.4	lincRNA	AC122818.4	havana	1	0.0001	0.0001	0.0001	0.0001	0.0001	0.0001	0.0001	0.112686	0.0001	0.0001	0.0001	0.463118
17	23813214	23813501	-	AC122821.1	processed_pseudogene	AC122821.1	havana	1	0.0001	0.825199	0.336845	1.37025	0.751012	0.671685	1.15989	1.46371	0.54718	0.446467	1.9134	0.347363
12	100571908	100573977	-	AC123705.1	TEC	AC123705.1	havana	1	0.146617	0.0660841	0.0001	0.520752	0.92435	0.308389	0.846628	1.21561	0.25849	1.33835	0.604712	2.0687
18	46771325	46773072	+	AC123927.1	TEC	AC123927.1	havana	1	0.0001	0.770192	1.29096	0.219324	0.422488	0.279927	0.386696	1.12596	0.945056	0.892835	1.29439	0.694627
18	46758557	46761978	+	AC123927.2	TEC	AC123927.2	havana	1	1.2455	1.92533	1.73995	0.712579	0.657148	1.06344	1.65694	3.82801	2.93444	0.892835	3.77043	2.0258
18	46765214	46770109	+	AC123927.3	TEC	AC123927.3	havana	1	0.659428	0.495159	1.51545	0.548161	0.610216	0.72765	1.21512	1.68889	3.53125	2.45512	1.57576	2.77821
18	8415129	8416048	+	AC123951.1	processed_pseudogene	AC123951.1	havana	1	1.78624	0.463979	2.15514	1.63759	1.38489	1.77019	2.30048	1.79949	2.90128	2.55762	0.686972	1.55348
16	85644252	85645024	+	AC123956.1	processed_pseudogene	AC123956.1	havana	1	0.292997	1.11059	0.00282607	4.12773	8.97821	6.82521	4.92427	1.31638	4.02365	10.6923	1.71672	2.55618
12	82000268	82000920	+	AC124484.1	lincRNA	AC124484.1	havana	1	0.143034	0.0001	0.0001	0.000111837	0.0956153	0.000100053	0.00236544	0.381925	0.000100001	0.624275	0.11425	0.0001
16	31933647	31935381	+	AC124681.1	TEC	AC124681.1	havana	1	0.0001	0.0001	0.0001	0.109712	0.281692	0.0001	0.055328	0.0001	0.298507	0.0001	0.168921	0.0001
16	31986831	31987124	-	AC124681.2	sense_intronic	AC124681.2	havana	1	0.0001	0.113612	0.0569891	0.0001	0.0001	0.112031	0.111522	0.0001	0.0001	0.154281	0.0001	0.0586534
12	19408348	19408741	+	AC124739.1	lincRNA	AC124739.1	havana	1	0.0001	0.0001	0.785839	0.383743	0.0001	0.0001	0.165784	0.281564	0.0498345	0.148889	0.0563735	0.0001
18	10262207	10263286	+	AC124740.2	processed_pseudogene	AC124740.2	havana	1	0.077127	0.0001	0.0001	0.320696	0.0001	0.0001	0.190348	0.0682379	0.0624337	0.0898505	0.131582	0.378207
16	53983928	53986085	+	AC125028.1	processed_pseudogene	AC125028.1	havana	1	0.0001	0.0001	0.0853064	0.163651	0.141478	0.0836237	1.1573	0.652338	1.15245	0.415245	0.551982	0.639967
18	14988995	15047988	+	AC125091.2	antisense	AC125091.2	havana	1	0.0001	0.0001	0.0001	0.274131	0.328624	0.0001	0.0001	0.619321	0.397976	0.148889	0.394015	0.0579772
12	81717830	81720053	-	AC125351.1	lincRNA	AC125351.1	havana	1	51.4277	45.4905	37.435	5.75474	6.14819	5.9884	1.49126	1.06966	1.98948	2.60391	1.18184	1.67854
16	23133906	23134321	-	AC125396.1	processed_pseudogene	AC125396.1	havana	1	0.0001	0.0551066	0.0001	0.0549061	0.23476	0.112031	0.055328	0.0001	0.0001	0.0001	0.112647	0.405241
16	23127793	23128923	+	AC125396.2	bidirectional_promoter_lncRNA	AC125396.2	havana	1	0.0733587	0.0001	0.0001	0.493355	0.23476	0.167996	0.441924	0.281564	0.298507	0.297678	0.394015	0.173732
17	27868481	27868979	-	AC126040.1	processed_pseudogene	AC126040.1	havana	1	0.0001	0.385146	0.0001	0.0001	0.328624	0.0001	0.055328	0.0001	0.0001	0.0001	0.0001	0.0001
17	27907803	27908350	+	AC126040.2	antisense	AC126040.2	havana	1	0.0001	0.0001	0.000112231	0.361396	0.0631642	0.0001	0.197793	0.0047777	0.000160635	0.0001	0.28302	0.0001
16	31679241	31680610	+	AC126055.2	TEC	AC126055.2	havana	1	0.0001	0.220126	0.0001	0.164518	0.047032	0.0560654	0.165784	0.225271	0.596914	0.297678	0.281468	0.0001
14	52860985	52862753	-	AC126250.1	TEC	AC126250.1	havana	1	2.70833	1.79321	1.26697	1.56145	1.169	4.59435	0.000100001	2.00934	2.61937	4.44674	1.34058	1.18469
16	30913331	30935630	-	AC126280.1	lincRNA	AC126280.1	havana	1	0.0001	0.0001	0.0001	0.328937	0.047032	0.0001	0.165784	0.168979	0.0498345	0.0001	0.168921	0.0001
17	26223711	26224555	+	AC126438.1	processed_pseudogene	AC126438.1	havana	1	0.661714	0.441557	0.738847	2.38434	2.47211	0.845477	0.949182	0.170042	0.150697	0.298115	0.566271	0.527204
17	26267395	26274745	-	AC126438.2	antisense	AC126438.2	havana	1	0.0001	0.0001	0.0001	0.0001	0.0001	0.0560654	0.055328	0.0563928	0.0995691	0.520862	0.112647	0.115854
17	26232564	26232882	+	AC126438.4	processed_pseudogene	AC126438.4	havana	1	0.0001	0.0551066	0.280721	0.383743	0.140896	0.783616	0.165784	0.0001	0.199038	0.0001	0.0001	0.0579772
16	21331902	21333357	-	AC126457.1	transcribed_processed_pseudogene	AC126457.1	havana	1	0.659428	1.04522	1.8522	3.94614	4.97489	4.30944	6.57224	5.96714	2.63603	3.49664	6.02137	3.82
18	23944959	23945551	+	AC126807.1	processed_pseudogene	AC126807.1	havana	1	0.0001	0.0001	0.0001	0.0854077	0.354567	0.393312	0.305638	0.245003	0.205659	0.142798	0.447469	0.112639
17	28223104	28224168	-	AC126937.1	antisense	AC126937.1	havana	1	2.72805	3.08942	4.37113	2.76445	1.93244	1.5956	3.09285	4.11877	2.61365	2.48646	1.54876	2.89938
17	28174657	28177683	-	AC126937.2	bidirectional_promoter_lncRNA	AC126937.2	havana	1	0.0001	0.0001	0.0001	0.185198	0.23476	0.320459	0.629913	1.14123	0.609668	0.228583	0.378593	0.173732
17	27545707	27556519	-	AC127341.3	antisense	AC127341.3	havana	1	0.366393	0.220126	0.0001	0.548161	0.093964	0.0560654	0.386696	0.563028	0.0995691	0.0001	0.506562	0.0001
17	27565112	27566223	+	AC127341.5	antisense	AC127341.5	ensembl_havana	1	0.0001	0.129533	0.280721	0.589377	0.406895	0.706767	0.347477	0.0715453	0.105513	0.0001	0.0731378	0.143026
10	67785749	67836402	+	AC127568.1	lincRNA	AC127568.1	havana	1	0.0001	0.438929	0.0001	0.689312	1.18989	0.0001	3.00048	2.9247	0.128809	2.46204	3.34467	0.936646
16	31760966	31766185	+	AC129214.1	TEC	AC129214.1	havana	1	0.732687	0.110113	0.336845	0.274131	0.281692	0.0001	0.110556	0.39415	0.397976	0.148889	0.675383	0.115854
17	17234872	17266064	+	AC129328.1	lincRNA	AC129328.1	havana	1	4.39562	3.56445	5.87942	7.13771	6.4975	7.66028	6.02015	8.60646	8.00281	6.29031	11.8874	12.8525
16	35866179	35867952	-	AC129574.2	TEC	AC129574.2	havana	1	0.0001	0.277655	0.05649	0.220429	0.190509	0.0563184	0.0559056	0.285953	0.0001	0.223284	0.227683	0.0580645
18	7868018	7869114	-	AC130718.2	antisense	AC130718.2	havana	1	0.659428	0.275133	0.0001	0.274131	0.187828	0.449603	0.773292	0.450443	0.248773	0.595256	0.394015	0.17442
16	31284424	31291897	-	AC130815.1	lincRNA	AC130815.1	havana	1	2.707	1.98034	1.01034	0.549231	0.657148	0.72765	0.55238	0.490747	0.249087	2.68974	0.0563735	0.289486
16	31233590	31248314	+	AC130815.2	lincRNA	AC130815.2	havana	1	4.02933	4.67566	2.30119	3.34327	2.72215	1.51117	3.03764	3.9406	2.23815	2.90149	4.61453	0.926136
16	90341595	90349643	-	AC131339.2	processed_transcript	AC131339.2	havana	1	0.0001	0.0001	0.280721	0.0549061	0.0001	0.0001	0.363399	0.112686	0.0995691	0.0744945	0.418919	0.0001
17	27623497	27624266	+	AC131800.1	bidirectional_promoter_lncRNA	AC131800.1	havana	1	0.219876	0.0001	0.0001	0.164518	0.0001	0.335892	0.055328	0.0001	0.298507	0.148889	0.0563735	0.115854
16	90089983	90090497	+	AC132099.1	processed_pseudogene	AC132099.1	havana	1	4.12138	2.89915	2.36779	1.11104	1.20002	2.98699	1.85077	1.4602	2.65062	2.13523	3.92466	1.00443
17	50114019	50117460	+	AC132235.2	lincRNA	AC132235.2	havana	1	0.0001	0.0001	0.0001	0.0549061	0.281692	0.167996	0.386696	0.506736	0.0498345	0.0001	0.394015	0.0001
17	84185756	84216057	+	AC132455.1	antisense	AC132455.1	havana	1	0.0001	0.525251	0.82594	0.112375	0.245533	0.177265	0.0001	0.0001	0.0519232	0.0001	0.0001	0.0615002
17	84134033	84156441	-	AC132455.2	lincRNA	AC132455.2	havana	1	1.61179	2.5304	1.96445	0.383743	0.0001	0.112031	0.110556	0.112686	0.0001	0.0744945	0.168921	0.0001
17	84078660	84089876	+	AC132455.3	lincRNA	AC132455.3	havana	1	0.0001	0.0001	0.0001	0.109712	0.375556	0.0560654	0.055328	0.0001	0.0995691	0.0001	0.0001	0.115854
17	27982392	27983159	+	AC132460.2	sense_intronic	AC132460.2	havana	1	0.0001	0.0551066	0.39297	0.0001	0.23476	0.167996	0.110556	0.337857	0.0001	0.223284	0.337741	0.0001
17	28001065	28002363	-	AC132460.3	antisense	AC132460.3	havana	1	0.732687	0.990218	1.01034	0.657773	0.844876	0.951512	0.662836	1.29484	0.54718	0.595256	0.675383	0.810381
17	80247102	80250686	+	AC132910.1	antisense	AC132910.1	havana	1	0.512911	0.22862	0.423272	0.348582	0.434931	0.167996	1.34994	1.20883	0.667645	1.59396	0.816374	1.01559
16	18482056	18486546	+	AC133487.1	TEC	AC133487.1	havana	1	0.0001	0.16512	0.0001	0.164518	0.422488	0.167996	0.441924	0.225271	0.0498345	0.0001	0.394015	0.115854
16	18620466	18626428	-	AC133488.1	protein_coding	AC133488.1	havana	1	39.2122	38.2119	23.8962	0.0716227	0.324825	3.04528	0.0001	0.000308066	0.242595	0.000564672	0.0001	0.0579765
18	15308858	15312700	-	AC133525.1	lincRNA	AC133525.1	havana	1	0.0001	0.0001	0.0001	0.219324	0.140896	0.112031	0.773292	0.506736	0.248773	0.744045	0.337741	0.0001
18	15403087	15430791	+	AC133525.2	antisense	AC133525.2	havana	1	0.0001	0.0001	0.224597	0.383743	0.422488	0.0560654	1.27034	1.91406	0.596914	0.446467	1.18184	0.63675
18	15351934	15362307	+	AC133525.3	lincRNA	AC133525.3	havana	1	0.0001	0.16512	0.0001	0.493355	0.375556	0.223962	1.04943	1.12596	0.199038	0.148889	0.225194	0.173732
12	39948444	39950633	-	AC134468.1	transcribed_processed_pseudogene	AC134468.1	havana	1	2.20058	3.62381	5.12158	2.99341	2.97646	6.02908	4.87972	7.82177	4.91098	0.779933	5.37503	2.15886
16	90934967	90935629	+	AC134560.2	bidirectional_promoter_lncRNA	AC134560.2	havana	1	0.0001	0.0001	0.112348	0.219324	0.0001	0.0001	0.0001	0.168979	0.0001	0.0001	0.281468	0.0001
16	90925532	90928111	+	AC134560.3	TEC	AC134560.3	havana	1	0.0001	0.0551066	0.0001	0.363829	0.122685	0.312313	0.595176	0.716235	0.490194	0.0001	0.675889	0.848081
17	82191968	82192610	-	AC135509.1	processed_pseudogene	AC135509.1	havana	1	0.0001	0.112733	0.0001	0.0001	0.172294	0.0001	0.318216	0.228031	0.000100568	0.299944	0.284335	0.122148
18	4353558	4368921	+	AC138768.1	lincRNA	AC138768.1	havana	1	0.0733587	0.641408	0.0562242	0.822192	0.791776	0.895546	0.110556	0.125142	0.0995691	0.744045	0.506562	0.867652
18	4399328	4400911	+	AC138768.3	lincRNA	AC138768.3	havana	1	0.0001	0.220126	0.0001	0.109712	0.46942	0.0560654	0.055328	0.0563928	0.149304	0.372073	0.450288	0.289486
16	68888346	68888596	+	AC139060.1	processed_pseudogene	AC139060.1	havana	1	0.0001	0.0499108	0.0001	0.0001	0.679206	0.390619	0.00896864	0.000126808	0.00263502	0.0001	0.000277188	0.0001
7	12623788	12640300	-	AC139131.1	processed_transcript	AC139131.1	havana	1	0.0001	0.110113	0.0001	0.109712	0.047032	0.0560654	0.110556	0.0563928	0.0001	0.0001	0.0563735	0.0001
7	102235854	102237531	+	AC139579.1	processed_transcript	AC139579.1	havana	1	1.67303	0.00852878	0.000154151	0.00129104	0.00154926	0.0001	0.000157686	0.00056646	0.000100001	0.000100001	0.000100002	0.000110057
17	66681738	66682195	-	AC139750.1	processed_pseudogene	AC139750.1	havana	1	0.0001	0.110098	0.0001	0.0001	0.0001	0.111919	0.0500302	0.196993	0.0001	0.280705	0.0321748	0.0001
17	26158569	26159005	-	AC140047.1	processed_pseudogene	AC140047.1	havana	1	0.0001	0.0001	0.0001	0.0001	0.23476	0.0001	0.110556	0.39415	0.0001	0.0001	0.0563735	0.289486
16	32550211	32553709	+	AC140186.1	lincRNA	AC140186.1	havana	1	18.095	17.3822	17.6793	0.274131	0.375556	2.46258	0.055328	0.0563928	0.646649	0.0001	0.0001	0.0579772
17	28799494	28801624	-	AC140278.1	bidirectional_promoter_lncRNA	AC140278.1	havana	1	0.293135	0.193527	0.336845	0.249834	0.375556	0.0680192	0.383667	0.39415	0.497445	0.297678	0.183988	0.0001
17	28822143	28822758	-	AC140278.2	antisense	AC140278.2	havana	1	0.0001	0.275133	0.0001	0.0001	0.0001	0.0001	0.055328	0.281564	0.248773	0.0001	0.0001	0.0579772
17	4880626	4881116	+	AC140300.2	processed_pseudogene	AC140300.2	havana	1	0.0001	0.0001	0.0001	0.307291	0.121096	0.0001	0.148198	0.00103678	0.0001	0.0001	0.0180323	0.0001
19	57497390	57512785	+	AC140413.1	lincRNA	AC140413.1	havana	1	0.0001	0.220126	0.112348	1.69909	2.44056	1.6231	2.3749	2.13923	2.28789	1.78557	2.53241	2.0258
14	27238062	27240495	+	AC140462.1	TEC	AC140462.1	havana	1	0.0001	0.0001	0.0001	0.0001	0.0001	0.112031	0.165784	0.112686	0.0001	0.520862	0.0001	0.0001
17	94814741	94816064	-	AC144860.1	TEC	AC144860.1	havana	1	0.336034	0.550166	2.18895	3.68816	2.4875	1.39924	8.94704	6.77223	4.49171	4.95907	9.17307	3.87787
17	94811611	94812923	-	AC144860.4	TEC	AC144860.4	havana	1	0.0001	0.0551066	0.505218	0.548161	0.516352	0.0001	0.938976	0.957078	0.0498345	0.0744945	1.0693	0.173732
18	8051203	8051993	+	AC148013.1	processed_pseudogene	AC148013.1	havana	1	0.467373	0.978263	0.345583	6.02625	11.1249	8.0297	8.83821	12.7912	17.6064	10.7715	7.06238	14.2105
16	91435293	91464804	-	AC150035.3	lincRNA	AC150035.3	havana	1	0.512911	0.0001	0.0001	0.0549061	0.0001	0.0001	0.110556	0.337857	0.0498345	0.0001	0.225194	0.0001
10	84502032	84502270	-	AC150314.1	processed_pseudogene	AC150314.1	havana	1	1.97808	1.98034	1.23483	0.0001	0.0001	0.0001	0.055328	0.0563928	0.0001	0.0001	0.0001	0.0001
17	46407004	46407485	-	AC151275.1	processed_pseudogene	AC151275.1	havana	1	0.0001	0.0001	0.0001	0.0001	0.23476	0.112031	0.0001	0.0001	0.0498345	0.0001	0.0602125	0.176101
17	78752255	78752716	+	AC151284.1	processed_pseudogene	AC151284.1	havana	1	0.366393	0.770192	0.679274	0.493355	0.336335	0.337875	0.911528	0.395558	0.35371	0.297678	0.226094	0.407791
17	78750995	78751497	+	AC151284.2	processed_pseudogene	AC151284.2	havana	1	1.31876	1.37526	0.505218	0.657773	0.657148	0.895546	1.10466	0.337857	0.845587	1.04162	0.844203	0.752504
17	29997956	30004692	-	AC151294.1	bidirectional_promoter_lncRNA	AC151294.1	havana	1	0.0001	0.0001	0.0562242	0.0001	0.0001	0.223962	0.0001	0.112686	0.0498345	0.0001	0.0001	0.231609
17	16320517	16321101	-	AC151299.1	processed_pseudogene	AC151299.1	havana	1	0.0974079	0.0001	0.0573757	0.52589	0.308397	0.487605	0.139046	0.060793	0.162771	0.301003	0.0001	0.0001
12	20990536	21040429	+	AC153140.1	lincRNA	AC153140.1	havana	1	0.0001	0.0001	0.0001	0.0001	0.210014	0.335892	0.88976	0.0590156	0.357273	0.446467	0.168921	0.0001
17	74852998	74860935	-	AC154178.2	antisense	AC154178.2	havana	1	0.0001	0.0001	0.0001	0.0549061	0.093964	0.0560654	0.27624	0.563028	0.199038	0.148889	0.675383	0.0001
17	70967886	70971806	+	AC154187.1	lincRNA	AC154187.1	havana	1	0.0001	0.0001	0.0001	0.164518	0.281692	0.0001	0.055328	0.112686	0.0001	0.0001	0.0001	0.0579772
17	70974119	71002209	-	AC154187.2	protein_coding	AC154187.2	havana	1	79.8104	18.0786	24.4453	17.5524	61.6667	30.4482	16.8425	22.8702	53.3601	3.08633	19.3666	38.8387
17	17340820	17374207	-	AC154200.1	lincRNA	AC154200.1	havana	1	0.0001	0.110113	0.168473	0.767386	0.187828	0.167996	0.386696	0.731907	0.646649	0.892835	0.78793	0.0001
17	71144538	71181988	+	AC154218.2	lincRNA	AC154218.2	havana	1	0.0001	0.110113	0.112348	0.0001	0.281692	0.391858	0.055328	0.0563928	0.0498345	0.0001	0.168921	0.405241
16	36875140	36880235	+	AC154232.2	TEC	AC154232.2	havana	1	11.9413	9.1862	9.99021	16.6064	13.0472	11.3611	16.9551	20.2092	16.1638	18.3756	22.1156	15.3376
17	29652228	29658337	-	AC154279.1	antisense	AC154279.1	havana	1	0.58617	0.16512	0.0001	0.0001	0.047032	0.0001	0.110556	0.0001	0.0001	0.297678	0.168921	0.0001
17	16669156	16670187	-	AC154306.1	processed_pseudogene	AC154306.1	havana	1	2.63512	2.5052	3.65145	0.985669	5.32838	2.64214	9.75011	8.68044	7.42214	7.81729	6.90412	8.02285
17	15421802	15434966	-	AC154378.1	lincRNA	AC154378.1	havana	1	3.12457	3.66229	2.63711	4.53652	3.66255	2.93992	4.64452	2.2822	2.49606	3.02043	4.4073	2.56908
17	15547816	15550463	+	AC154378.3	processed_pseudogene	AC154378.3	havana	1	0.219876	0.16512	0.0562242	0.548161	0.281692	0.167996	0.110556	0.39415	0.0001	0.0744945	0.337741	0.0001
17	74519665	74528095	-	AC154442.1	processed_transcript	AC154442.1	havana	1	0.0001	0.16512	0.0001	0.0549061	0.281692	0.112031	0.055328	0.112686	0.0995691	0.148889	0.0563735	0.0579772
17	55700407	55701818	+	AC154443.2	processed_pseudogene	AC154443.2	havana	1	0.439652	0.0001	0.0001	0.111434	0.246788	0.391858	0.279435	0.229089	0.0001	0.0001	0.0001	0.524972
17	65438128	65438698	-	AC154457.3	processed_pseudogene	AC154457.3	havana	1	0.0001	0.0001	0.0001	0.0001	0.614489	0.475014	0.279064	0.309209	0.137127	0.0001	0.499089	1.74397
17	21968487	21968795	-	AC154483.1	processed_pseudogene	AC154483.1	havana	1	0.879204	0.16512	0.0001	0.0001	0.0001	0.167996	0.110556	0.0001	0.0001	0.0001	0.0563735	0.0001
17	22777217	22807737	-	AC154486.3	processed_pseudogene	AC154486.3	havana	1	0.0001	0.0938681	0.0001	1.15499	1.36789	0.393482	1.50842	2.3787	1.74081	2.08315	2.59527	0.0001
17	86970372	86975289	+	AC154492.2	sense_intronic	AC154492.2	havana	1	2.1246	2.03534	1.01034	5.42591	6.71137	2.9103	2.98241	3.77172	1.24346	4.01741	5.17727	3.82
16	23050282	23050852	+	AC154540.2	processed_pseudogene	AC154540.2	havana	1	0.0740282	0.199468	0.0001	0.08253	0.257697	0.0593884	0.0816771	0.126189	0.0001	0.0001	0.063431	0.0649124
17	86175575	86178030	+	AC154542.1	TEC	AC154542.1	havana	1	0.0001	0.0001	0.280721	0.438549	0.140884	0.335892	0.110556	0.19224	0.0995691	0.148889	0.225194	0.810381
16	35320712	35323067	-	AC154654.1	TEC	AC154654.1	havana	1	0.0001	0.0551066	0.0562242	0.164518	0.46942	0.223962	0.27624	0.168979	0.149304	0.446467	0.337741	0.173732
16	17092815	17096351	+	AC154667.1	antisense	AC154667.1	havana	1	0.0733587	0.110113	0.168473	0.283886	0.140896	0.223962	0.302113	0.112686	0.298507	0.0001	0.225194	0.0001
17	22067264	22069889	-	AC154707.1	processed_pseudogene	AC154707.1	havana	1	0.0001	0.0001	0.227036	0.116583	0.0001	0.0001	0.118746	0.0629046	0.070235	0.700436	0.0632241	0.0001
17	22184764	22186109	-	AC154707.2	processed_pseudogene	AC154707.2	havana	1	9.65144	3.2844	1.75241	0.614684	0.836448	1.65563	0.455272	1.54199	0.602619	12.6613	4.11515	0.705925
14	118982994	118983761	-	AC154760.1	lincRNA	AC154760.1	havana	1	0.0001	0.0001	0.0001	0.164518	0.0001	0.279927	0.0001	0.281564	0.149304	0.148889	0.112647	0.0001
16	36894394	36895684	+	AC154763.2	TEC	AC154763.2	havana	1	0.0001	0.220126	0.0001	0.3966	0.717411	0.0564746	0.113697	0.3416	0.404186	0.0001	0.573786	0.355038
17	23619236	23620901	-	AC154766.1	processed_pseudogene	AC154766.1	havana	1	0.81572	0.240956	0.756573	0.0001	0.0001	0.0001	0.0001	0.0001	0.0001	0.0001	0.0001	0.0001
17	23636596	23636740	+	AC154766.2	processed_pseudogene	AC154766.2	havana	1	1.09898	0.856892	0.280721	0.0001	0.0001	0.0001	0.0001	0.0001	0.0001	0.0001	0.0001	0.0001
17	23550799	23565292	+	AC154766.4	antisense	AC154766.4	havana	1	0.450734	0.0001	0.0593468	0.109712	0.0001	0.223962	0.165784	0.225271	0.54718	0.81844	0.0001	0.0001
16	28950923	28951356	-	AC154807.1	processed_pseudogene	AC154807.1	havana	1	0.0001	0.0752899	0.0001	0.0001	0.0001	0.0001	0.168255	0.0001	0.289973	0.0001	0.0708234	0.0686814
17	28446500	28456458	+	AC154912.1	antisense	AC154912.1	havana	1	0.659428	0.605172	0.168473	0.657773	0.657148	0.559754	0.497152	1.06966	0.0995691	0.148889	0.562835	0.810381
17	28528743	28530735	-	AC154912.2	bidirectional_promoter_lncRNA	AC154912.2	havana	1	0.0001	0.385146	0.280721	0.0549061	0.0001	0.223962	0.110556	0.112686	0.248773	0.372073	0.112647	0.0001
17	28457484	28461096	-	AC154912.3	TEC	AC154912.3	havana	1	5.42124	2.86044	1.68383	2.74041	2.3467	0.895546	1.54648	3.99689	1.09426	3.71983	5.23354	2.83608
17	28520008	28520251	+	AC154912.4	processed_pseudogene	AC154912.4	havana	1	0.0001	0.0001	0.336845	0.0001	0.0001	0.0001	0.110556	0.112686	0.0498345	0.0001	0.0001	0.0001
17	28424723	28426431	-	AC154912.5	sense_intronic	AC154912.5	havana	1	0.659428	0.385146	1.12258	2.08273	1.64272	2.01485	1.10466	1.35113	0.795852	2.30633	2.19477	1.44703
18	9495621	9496510	+	AC158568.2	processed_pseudogene	AC158568.2	havana	1	0.0001	0.0001	0.0001	0.117356	0.0001	0.229872	0.0001	0.177357	0.0001	0.165545	0.0631916	0.0001
16	58651490	58655245	-	AC159200.1	lincRNA	AC159200.1	havana	1	0.0001	0.0555696	0.172283	0.0594962	0.047516	0.0560654	0.0001	0.0001	0.0001	0.0753221	0.28334	0.0579772
14	44544055	44637202	-	AC160336.1	lincRNA	AC160336.1	havana	1	54.0889	69.104	65.0952	41.0469	37.1301	29.6202	9.33955	12.4508	10.2968	7.80187	11.0918	11.2851
9	59672814	59676701	+	AC160637.1	TEC	AC160637.1	havana	1	159.802	157.861	148.104	105.171	86.9285	69.4981	60.6847	46.2209	44.9625	43.982	49.2282	53.0565
18	9434823	9436851	-	AC161530.1	TEC	AC161530.1	havana	1	0.146617	0.0001	0.0001	0.219324	0.093964	0.0001	0.055328	0.0001	0.199038	0.297678	0.225194	0.347363
16	42884370	42912066	-	AC161607.1	antisense	AC161607.1	havana	1	0.0733587	0.0001	0.336845	0.164518	0.0001	0.0001	0.110556	0.337857	0.0001	0.223284	0.337741	0.868258
17	29319981	29322550	-	AC162182.1	antisense	AC162182.1	havana	1	0.593205	1.23741	0.482921	0.0001	0.310592	0.0001	0.0595575	0.0740647	0.0001	0.0001	0.0001	0.122243
18	23216669	23217612	+	AC162373.1	processed_pseudogene	AC162373.1	havana	1	0.293135	0.16512	0.0758379	0.0001	0.187828	0.112031	0.19424	0.0563928	0.149304	0.446467	0.168921	0.0579772
12	118231595	118234565	-	AC163032.1	lincRNA	AC163032.1	havana	1	5.27473	6.76591	5.72477	3.50769	5.11569	2.63047	3.75561	3.99689	3.33231	2.90149	5.06472	4.74603
18	9711293	9714535	+	AC163101.1	TEC	AC163101.1	havana	1	0.0001	0.0001	0.0001	0.0001	0.0001	0.167996	0.0001	0.0563928	0.0001	0.0001	0.0001	0.347363
18	9716439	9719170	+	AC163101.2	TEC	AC163101.2	havana	1	0.0001	0.0001	0.0001	0.0001	0.0001	0.112031	0.0001	0.168979	0.0001	0.0001	0.0001	0.405241
18	30419686	30420061	-	AC163399.1	processed_pseudogene	AC163399.1	havana	1	0.00645366	0.00638951	0.0518556	2.7866	0.864654	6.32585	1.15103	0.472335	2.01018	0.0227439	1.84931	0.130783
17	29430798	29437449	-	AC163635.1	processed_transcript	AC163635.1	havana	1	0.0001	0.0001	0.0001	0.876998	0.657148	0.503789	0.110556	0.0001	0.0498345	0.223284	0.0563735	0.0579772
16	64917983	64919085	-	AC163694.1	processed_pseudogene	AC163694.1	havana	1	1.66694	0.826748	1.79943	0.93186	0.633353	0.260529	1.19362	0.0001	0.165323	0.237407	0.17624	0.456564
17	7982522	8101242	-	AC164314.1	processed_transcript	AC164314.1	ensembl_havana	1	9.19407	9.32371	11.8423	10.4407	8.35399	12.5643	19.5232	22.3765	23.9224	12.0148	10.2422	7.43733
17	8082695	8147789	-	AC164314.2	protein_coding	AC164314.2	havana	1	0.0001	0.0446969	0.414583	0.0001	0.503746	0.0001	0.0978517	0.0001	0.0001	0.42403	0.3751	0.161695
12	20615343	20637949	+	AC164424.1	lincRNA	AC164424.1	havana	1	0.0001	0.344456	0.133727	0.993689	1.0025	0.437923	1.45182	1.51541	0.687051	0.595256	1.15399	1.1942
17	8384053	8384661	-	AC164431.1	processed_pseudogene	AC164431.1	havana	1	0.0001	0.139332	0.0001	0.14341	0.0630695	0.487985	1.68421	0.0001	1.0031	0.186542	0.673841	0.820576
16	34006843	34007458	-	AC165079.1	processed_pseudogene	AC165079.1	havana	1	0.000151481	0.000102809	0.000212666	0.00669262	0.00029878	0.00450057	0.45473	0.000870056	0.481649	1.70467	1.27981	0.263749
16	55883072	55884492	-	AC165151.1	processed_pseudogene	AC165151.1	havana	1	0.952463	1.49342	0.57501	0.549084	0.474341	0.566851	0.774809	1.93012	0.906423	0.527628	1.4157	0.353085
17	84784792	84788623	+	AC165360.1	TEC	AC165360.1	havana	1	0.0001	0.0001	0.0001	0.219324	0.328624	0.391858	0.331468	0.844493	0.646649	0.0001	0.619109	0.463118
17	3312250	3314186	-	AC165953.1	processed_pseudogene	AC165953.1	havana	1	0.0001	0.0001	0.0001	0.914245	0.860654	1.34319	0.000357134	1.05784	0.268515	0.0001	0.651447	0.361787
17	3198110	3311121	+	AC165953.2	lincRNA	AC165953.2	havana	1	3.08698	2.53119	4.03941	6.67525	3.64198	5.01657	4.58266	5.01596	6.07911	9.69186	5.24868	6.25728
16	16852315	16853858	+	AC165958.1	processed_pseudogene	AC165958.1	havana	1	0.0001	0.0001	0.0001	0.0001	0.0001	0.0001	0.055328	0.39415	0.0995691	0.0001	0.0001	0.0001
17	53496081	53500947	-	AC165960.2	antisense	AC165960.2	havana	1	0.0001	0.220126	0.336845	0.548161	0.281692	0.223962	0.331468	0.112686	0.248773	0.148889	0.0563735	1.04189
17	65661327	65661579	-	AC166058.1	processed_pseudogene	AC166058.1	havana	1	0.36472	0.00140537	0.00765443	0.156859	0.702141	0.00010301	0.000205422	0.0563792	0.00680554	0.0681818	0.901769	0.894388
17	24779703	24781985	+	AC166102.1	lincRNA	AC166102.1	havana	1	0.439652	0.330139	1.45933	0.0549061	0.140896	1.79099	0.165784	0.337857	1.49214	0.0001	0.0001	0.520995
17	13384029	13385586	-	AC166110.2	transcribed_unprocessed_pseudogene	AC166110.2	havana	1	0.00211466	0.000328929	0.000170151	0.00012573	1.34656	0.000101176	0.000161858	0.000105091	0.000103049	0.000101751	0.000103597	0.000100079
17	13341241	13345881	-	AC166110.3	transcribed_processed_pseudogene	AC166110.3	havana	1	0.0001	0.16512	0.39297	4.57102	4.3364	4.08966	2.17246	1.58265	1.00336	2.16116	1.64326	1.71533
16	48749400	48750449	-	AC166114.1	processed_pseudogene	AC166114.1	havana	1	0.560215	0.000100023	0.0001	0.000185928	0.152954	0.23013	0.796494	0.112582	0.882309	0.7232	0.259397	0.127774
17	13096679	13098473	-	AC166360.2	unprocessed_pseudogene	AC166360.2	havana	1	5.49054	4.57962	1.80261	1.47033	0.619103	1.2873	1.38073	1.10301	0.428688	0.892833	0.756498	1.35178
16	16909431	16911717	-	AC166832.3	antisense	AC166832.3	havana	1	0.268831	0.110113	0.117852	0.184282	0.0001	0.119616	0.333205	0.464446	0.958025	0.0001	0.229719	0.463118
17	6535892	6582704	-	AC167249.1	unprocessed_pseudogene	AC167249.1	havana	1	11.1034	7.76694	4.07336	8.67066	10.3548	3.38188	12.7536	10.9786	8.2648	14.4186	12.6311	8.90203
17	29053336	29060168	+	AC167363.1	lincRNA	AC167363.1	havana	1	0.0001	0.0568421	0.0001	0.286723	0.0669009	0.000100002	0.302461	0.30245	0.273754	0.0001	0.392064	0.420171
17	29093416	29094462	-	AC167363.2	TEC	AC167363.2	havana	1	0.0001	0.0001	0.0001	0.168468	0.71245	0.223962	0.614287	0.794776	0.454275	0.373387	0.744526	0.752504
17	6808509	6818530	+	AC168090.1	lincRNA	AC168090.1	havana	1	0.219876	0.16512	0.0001	0.164518	0.093964	0.0001	0.165784	0.225271	0.0001	0.297678	0.168921	0.0001
16	93888734	93890148	+	AC168220.2	sense_intronic	AC168220.2	havana	1	0.58617	0.0001	0.0001	0.0001	0.0001	0.112031	0.0001	0.112686	0.0001	0.0744945	0.225194	0.0001
16	93808540	93833020	-	AC168220.3	antisense	AC168220.3	havana	1	0.0001	0.0551066	0.561342	0.383743	0.70408	0.615719	0.221012	0.225271	0.0001	0.744045	0.0563735	0.289486
18	28187110	28188818	-	AC168306.1	processed_pseudogene	AC168306.1	havana	1	0.685075	1.00605	0.803088	1.41688	1.20551	1.31864	0.4517	2.084	1.79186	1.43994	3.01362	0.785362
17	74329533	74329889	-	AC169506.3	processed_pseudogene	AC169506.3	havana	1	0.0849225	0.172671	0.0001	0.069614	0.127293	0.270238	0.0685492	0.149823	0.145557	0.0001	0.0675516	0.0001
16	24122699	24382391	-	AC169509.1	transcribed_processed_pseudogene	AC169509.1	havana	2	10.3542	5.01664	6.08078	5.1389	6.4308	7.30845	3.12091	5.67171	3.76299	10.2624	2.97637	8.03686
17	28726083	28726701	+	AC170998.1	protein_coding	AC170998.1	havana	1	1.35857	2.67611	1.45468	3.24171	3.24547	1.99053	1.80053	1.95375	1.20985	3.81108	1.47097	1.9291
17	13482553	13668892	-	AC173344.1	lincRNA	AC173344.1	havana	1	0.0001	0.0001	0.0001	0.712579	0.516352	0.72765	0.386696	0.506736	0.696383	0.0744945	0.900477	0.694627
14	55643604	55646353	+	AC174678.1	antisense	AC174678.1	havana	1	1.68505	2.42039	2.24507	3.67211	2.15897	1.11941	3.92129	4.44723	2.48473	4.16619	4.16434	1.91005
17	6511791	6528714	-	AC183095.1	unprocessed_pseudogene	AC183095.1	havana	1	67.4658	46.8423	28.944	39.1061	45.3525	27.176	44.2125	47.3974	32.8644	90.3271	52.5971	39.5842
17	6356813	6411835	-	AC183097.1	processed_transcript	AC183097.1	havana	1	4.569	5.99157	5.34055	9.11859	7.90953	5.61772	8.94364	9.74035	2.62788	9.9511	10.3998	4.05539
17	6339604	6361849	-	AC183097.2	unprocessed_pseudogene	AC183097.2	havana	1	0.0202132	0.00039076	0.0517378	0.296277	0.00124201	0.329371	0.494336	0.000220518	0.000910578	0.0147885	0.000351127	0.00270006
17	6354689	6355527	-	AC183097.3	processed_pseudogene	AC183097.3	havana	1	0.0001	0.446313	0.0001	1.30219	0.381857	0.0560654	1.07492	0.353405	0.961317	0.148889	0.647404	0.115854
12	18648214	18649999	+	AC238676.1	processed_pseudogene	AC238676.1	havana	1	1.90483	1.1888	1.9322	3.07404	2.2143	3.70743	4.81273	5.57395	3.4414	6.02294	7.57254	5.2092
17	48238211	48240642	-	AC241601.2	processed_pseudogene	AC241601.2	havana	1	3.58978	4.78567	3.87267	0.98661	0.751012	1.00748	0.607608	0.112686	0.397976	0.0001	0.506562	0.347363
17	7429287	7430243	-	AC241886.2	processed_pseudogene	AC241886.2	havana	1	0.0001	0.0001	0.0001	0.000159931	0.66392	0.00350531	0.116586	0.10094	0.000101012	0.145119	0.0001	0.0001
9	119339676	119350300	+	Acaa1a	protein_coding	Acaa1a	ensembl_havana	16	28.8641	30.0337	24.807	59.0263	56.3655	39.1759	48.89	37.4349	33.7942	32.9569	35.4524	45.8014
9	119148023	119157094	-	Acaa1b	protein_coding	Acaa1b	ensembl_havana	4	0.0001	0.0001	0.000199339	0.0001	0.0001	0.0001	0.25782	0.000133221	0.499856	0.0001	0.0001	0.0953877
18	74779197	74806208	+	Acaa2	protein_coding	Acaa2	ensembl	9	7.32597	8.03106	7.12788	44.9411	50.452	30.949	52.5219	40.531	43.5675	32.9569	38.4349	34.3792
11	84129672	84401652	+	Acaca	protein_coding	Acaca	ensembl_havana	18	18.8276	15.9048	29.3465	44.1352	45.3274	58.5442	94.6718	86.1164	99.5448	65.6293	83.6273	73.0466
5	114146535	114250762	+	Acacb	protein_coding	Acacb	ensembl_havana	16	0.0001	0.110113	0.168473	0.767386	0.328624	0.559754	1.27034	1.80147	1.74081	2.23194	1.9134	0.694627
5	121621026	121660515	-	Acad10	protein_coding	Acad10	ensembl_havana	12	8.33634	5.83431	7.38243	7.97697	10.9528	8.27485	13.4107	10.3761	12.7186	7.48436	9.17955	6.17448
9	104063377	104127726	+	Acad11	protein_coding	Acad11	ensembl_havana	10	33.3328	36.7411	28.2863	14.1886	11.8161	13.2634	18.3323	17.7323	21.1175	12.4984	17.4993	16.7266
5	121596775	121618939	-	Acad12	protein_coding	Acad12	ensembl_havana	13	9.6855	12.2631	8.50093	9.61599	8.85265	5.10108	7.35526	6.34306	5.53415	5.68368	8.04036	5.74843
9	26974135	26999567	-	Acad8	protein_coding	Acad8	ensembl_havana	16	11.575	13.0917	10.4392	18.0861	21.5888	12.3125	29.1053	23.4179	23.3753	15.9205	24.0289	22.7459
3	36065979	36092854	+	Acad9	protein_coding	Acad9	ensembl_havana	14	8.10785	9.2301	5.56087	21.7631	23.9824	17.779	32.885	30.7704	28.8782	24.9152	28.674	22.5817
1	66830839	66863278	-	Acadl	protein_coding	Acadl	ensembl_havana	5	49.3032	58.2519	53.1499	38.0356	39.5168	41.0227	70.8577	80.4422	61.7706	69.7822	79.9087	56.0833
3	153922357	153944633	-	Acadm	protein_coding	Acadm	ensembl_havana	12	19.78	21.8927	16.6366	36.3303	39.0944	37.1611	40.8639	40.531	48.3418	38.9828	45.244	41.7875
5	115110299	115119347	-	Acads	protein_coding	Acads	ensembl_havana	13	12.5273	11.6615	10.1025	25.1013	33.0873	17.6292	48.104	36.3089	38.3951	36.007	36.578	33.5111
7	131410601	131448945	+	Acadsb	protein_coding	Acadsb	ensembl_havana	15	33.7723	45.9306	43.328	39.9538	35.152	36.2657	36.2849	40.3057	41.9762	32.8081	47.2698	38.0834
11	70010183	70015412	-	Acadvl	protein_coding	Acadvl	ensembl_havana	14	23.5425	30.7494	25.4698	31.4673	39.3286	25.2987	41.3064	36.1811	34.3028	31.9786	38.4682	36.1053
11	69881567	69895540	-	Acap1	protein_coding	Acap1	ensembl_havana	12	222.119	219.64	210.69	27.6771	27.8776	46.5633	58.7074	45.766	47.2977	47.2407	54.8104	42.5398
16	31092412	31201246	-	Acap2	protein_coding	Acap2	ensembl_havana	11	139.34	184.436	203.562	155.63	158.44	174.557	121.466	114.388	130.205	113.619	134.099	160.724
4	155891822	155907252	+	Acap3	protein_coding	Acap3	ensembl_havana	16	47.6915	32.784	29.3531	48.2294	50.8275	41.8623	30.9278	23.6994	29.6916	34.8912	22.9034	43.7553
9	53580522	53610383	-	Acat1	protein_coding	Acat1	ensembl_havana	5	11.868	16.7221	20.5977	50.0382	50.8276	47.3468	75.4415	78.6412	73.3584	76.3289	81.2028	60.5975
17	12942890	12960748	-	Acat2	protein_coding	Acat2	ensembl_havana	14	2.72769	2.80068	2.94686	7.13946	7.10581	8.97532	20.5909	15.8967	19.9682	12.4816	16.0513	18.2534
17	12923813	12940601	-	Acat3	protein_coding	Acat3	ensembl_havana	12	0.114053	0.000100025	0.900648	1.17709	0.837049	0.420572	2.25206	2.08645	2.53215	1.68128	1.56517	0.774822
1	180726043	180754205	+	Acbd3	protein_coding	Acbd3	ensembl_havana	5	31.7944	43.1803	54.8896	48.9419	44.21	56.9169	47.2201	41.4316	60.2286	40.4707	47.8889	55.678
11	103101682	103112201	+	Acbd4	protein_coding	Acbd4	ensembl_havana	16	5.93406	4.34562	3.25531	6.19319	7.18069	5.14892	5.9095	5.96714	3.82966	7.73713	4.27689	4.86179
2	23068167	23115559	+	Acbd5	protein_coding	Acbd5	ensembl_havana	17	19.0474	33.4441	29.9704	51.3534	49.5134	43.3733	37.9418	37.2659	40.8819	37.7925	51.8844	47.4017
1	155558120	155691331	+	Acbd6	protein_coding	Acbd6	ensembl_havana	13	7.83878	7.536	6.67888	13.9757	15.4407	17.2934	23.8034	26.7392	26.8567	20.161	21.0464	15.1639
2	93833467	93849944	-	Accs	protein_coding	Accs	ensembl_havana	14	0.146617	0.385146	0.673591	7.12489	7.69694	5.42874	9.83069	9.73876	8.50471	16.2181	11.2548	8.68168
8	105695860	105701103	-	Acd	protein_coding	Acd	ensembl_havana	10	34.9919	23.6134	20.7724	19.4028	19.8138	21.1065	29.7125	26.2085	29.0948	31.8355	19.7124	25.804
11	105967945	105989965	+	Ace	protein_coding	Ace	ensembl_havana	14	8.93767	6.82092	2.0767	155.478	182.438	161.573	5.35722	7.93739	2.18842	6.91879	4.83962	7.81353
4	86874396	86934823	+	Acer2	protein_coding	Acer2	ensembl_havana	14	0.0001	0.0001	0.112348	0.548161	0.281692	0.0001	1.54648	1.23854	1.14399	1.71117	1.68831	0.115854
7	98206389	98321209	-	Acer3	protein_coding	Acer3	ensembl_havana	14	10.6226	9.79127	16.9496	82.483	72.979	85.0114	46.5574	48.4683	52.7189	45.9759	62.3512	75.7038
5	137287519	137294467	+	Ache	protein_coding	Ache	ensembl_havana	14	0.219876	0.0001	0.39297	0.0549061	0.187828	0.0001	0.055328	0.39415	0.0498345	0.0001	0.619109	0.115854
14	54642161	54686932	-	Acin1	protein_coding	Acin1	ensembl_havana	19	221.263	199.677	235.248	214.082	215.144	246.336	296.508	299.765	363.354	288.355	276.429	273.236
1	173331886	173333751	-	Ackr1	protein_coding	Ackr1	ensembl_havana	5	0.0001	0.110113	0.0562242	0.0001	0.0001	0.0001	0.0001	0.0001	0.0001	0.0001	0.394015	0.0001
9	104084157	104126934	-	Ackr4	protein_coding	Ackr4	ensembl_havana	5	0.0733587	0.608512	0.337274	0.170771	0.490095	0.112572	0.39014	0.112686	0.169078	0.148889	0.564656	0.0001
11	100476353	100528001	-	Acly	protein_coding	Acly	ensembl_havana	17	233.77	250.615	206.986	266.851	272.062	268.414	320.876	304.429	303.326	280.247	275.739	282.792
4	40143081	40198339	+	Aco1	protein_coding	Aco1	ensembl_havana	9	7.69226	9.62625	10.1025	51.6823	53.925	46.7313	41.5868	36.8719	42.921	37.9413	39.0539	55.9673
15	81872309	81915134	+	Aco2	protein_coding	Aco2	ensembl_havana	13	65.4051	60.0199	63.3081	101.948	109.298	101.058	170.835	150.328	154.554	122.222	133.377	133.194
14	103046977	103056574	+	Acod1	protein_coding	Acod1	ensembl_havana	6	4.10259	5.33574	5.94927	0.548161	0.985672	0.72765	0.0001	0.0001	0.0001	0.372073	0.0001	0.0001
12	84009490	84018372	+	Acot1	protein_coding	Acot1	ensembl_havana	6	11.1972	11.5512	8.53389	16.837	19.3956	5.62672	14.7866	13.3419	4.85621	7.04023	9.28978	3.58235
15	20665214	20666751	-	Acot10	protein_coding	Acot10	ensembl_havana	5	0.803292	0.412198	0.618119	0.489523	0.184261	0.285486	0.0719043	0.150815	0.447287	0.952393	0.0001	0.626452
4	106744555	106804999	-	Acot11	protein_coding	Acot11	ensembl_havana	16	4.76192	4.67566	5.27578	31.6232	28.1124	24.7928	21.3181	17.9575	20.8389	22.5417	19.9772	40.0512
13	24817948	24831541	-	Acot13	protein_coding	Acot13	ensembl_havana	7	2.19786	5.17072	6.17377	7.07009	5.20955	8.33894	6.13041	9.4573	12.6824	7.88592	8.21604	8.3923
12	83987861	83993874	+	Acot2	protein_coding	Acot2	ensembl_havana	7	7.66903	5.28101	2.41054	7.49203	5.8931	3.3833	9.29825	8.874	6.54298	12.26	8.49286	5.33625
12	84038379	84048602	+	Acot4	protein_coding	Acot4	ensembl_havana	5	0.0001	0.330139	0.0001	0.0001	0.0479514	0.115976	0.221012	0.114263	0.0001	0.22424	0.0563735	0.0001
12	84100654	84111350	+	Acot6	protein_coding	Acot6	ensembl_havana	4	0.0001	0.220126	0.280721	0.168193	0.427906	0.223962	2.20922	2.54277	0.497445	1.04162	1.85713	0.0579772
4	152178134	152271856	+	Acot7	protein_coding	Acot7	ensembl_havana	14	10.3296	12.5416	9.03609	27.0742	28.0185	31.7325	47.8828	43.6272	56.2494	33.9983	36.9719	35.7104
2	164792765	164804883	-	Acot8	protein_coding	Acot8	ensembl_havana	16	13.7424	13.1165	9.88801	15.2624	15.551	14.1606	11.5813	11.5124	12.1468	12.5846	9.63228	12.5382
X	155262443	155297655	+	Acot9	protein_coding	Acot9	ensembl_havana	15	26.8887	28.0264	26.5462	39.1354	37.5022	37.7152	39.6371	37.0025	37.948	32.5998	44.1749	41.0452
11	116171888	116199046	-	Acox1	protein_coding	Acox1	ensembl_havana	16	43.5158	43.9502	38.1646	63.0819	52.851	53.2232	54.0185	51.6207	52.4845	43.521	51.9969	56.6617
14	8225511	8259354	-	Acox2	protein_coding	Acox2	ensembl_havana	13	0.366393	0.550166	0.112348	0.0001	0.0001	0.0001	0.0001	0.0001	0.0001	0.0001	0.0001	0.0001
5	35583040	35615353	+	Acox3	protein_coding	Acox3	ensembl_havana	17	148.423	141.971	98.5538	294.807	309.457	178.811	161.651	138.255	113.757	159.502	144.173	184.107
2	127838876	128123874	+	Acoxl	protein_coding	Acoxl	ensembl_havana	10	0.0001	0.110113	0.0001	0.0549061	0.047032	0.112031	0.165784	0.563028	0.746118	0.520862	0.0001	0.0001
12	30893326	30911590	-	Acp1	protein_coding	Acp1	ensembl_havana	16	13.1629	16.8158	14.7919	23.0395	24.9944	21.1036	43.5004	42.0045	38.6436	28.6417	44.2874	29.5616
2	91202885	91214099	+	Acp2	protein_coding	Acp2	ensembl_havana	15	18.9303	9.86615	9.76704	17.3539	16.0056	18.6632	18.9632	14.4287	17.7945	22.2057	15.0131	14.523
9	22126727	22135712	-	Acp5	protein_coding	Acp5	ensembl_havana	15	0.0001	0.385146	0.449094	4.76823	6.38285	6.99578	1.7674	1.68889	2.63603	1.3392	2.08222	2.48882
3	97158777	97177300	+	Acp6	protein_coding	Acp6	ensembl_havana	15	5.56776	3.68554	7.57687	16.6063	14.549	17.1815	29.6576	28.0339	31.2333	25.1454	26.8426	21.704
9	104288251	104337749	-	Acpp	protein_coding	Acpp	ensembl_havana	15	134.064	160.73	131.443	54.861	61.0587	52.048	19.606	22.5735	24.8176	21.1281	18.0639	14.3537
6	125049689	125063268	+	Acrbp	protein_coding	Acrbp	ensembl_havana	9	7.63266	9.95226	9.44816	8.45908	8.72335	5.88983	6.71587	6.23238	4.67462	7.72809	7.21891	10.8373
11	94557102	94601872	-	Acsf2	protein_coding	Acsf2	ensembl_havana	3	2.19786	1.17066	1.51545	14.4689	12.601	21.6027	26.4655	25.1174	22.3309	30.6843	27.0677	22.2592
8	122775486	122817881	+	Acsf3	protein_coding	Acsf3	ensembl_havana	8	3.22348	4.73066	3.03081	13.9209	15.3468	8.78667	17.2312	17.282	13.9755	13.0191	17.276	15.1061
8	46471037	46536052	+	Acsl1	protein_coding	Acsl1	ensembl_havana	13	645.823	631.588	508.974	169.923	187.214	185.67	130.856	130.231	150.263	118.882	114.068	127.852
1	78657825	78707744	+	Acsl3	protein_coding	Acsl3	ensembl_havana	15	0.146617	0.275133	1.23483	2.46638	2.90988	3.91768	8.50522	8.5057	8.05709	8.03471	9.62288	7.92928
X	142317993	142390536	-	Acsl4	protein_coding	Acsl4	ensembl_havana	12	52.1605	61.7724	63.4767	53.7646	53.5027	58.0361	56.5532	53.1966	65.8481	47.3894	63.0259	68.7585
19	55251938	55297721	+	Acsl5	protein_coding	Acsl5	ensembl_havana	6	57.045	62.028	88.4412	95.0721	99.2873	99.8947	146.421	124.931	143.139	112.186	152.933	124.47
7	119554340	119600691	+	Acsm2	protein_coding	Acsm2	ensembl_havana	17	0.0001	0.0001	0.0001	0.0001	0.187271	0.0001	0.0001	0.0563928	0.0001	0.297678	0.0563735	0.289486
7	119760923	119787514	+	Acsm3	protein_coding	Acsm3	ensembl_havana	15	0.0001	0.0001	0.0001	0.0001	0.492945	0.0001	0.75721	1.13223	0.948595	0.148889	0.94285	0.0001
2	150618105	150668501	-	Acss1	protein_coding	Acss1	ensembl_havana	11	3.66303	2.03534	1.23483	24.4436	27.3614	19.4761	12.7578	13.2289	9.05178	15.8461	13.1118	16.2636
2	155517948	155585725	+	Acss2	protein_coding	Acss2	ensembl_havana	18	19.7799	20.1875	32.0581	13.3367	19.6977	18.0769	8.45982	7.31817	12.1851	6.17485	8.32858	13.9208
8	123891769	123894752	-	Acta1	protein_coding	Acta1	ensembl_havana	5	0.0001	0.0001	0.0001	0.221099	0.188702	0.0001	0.0001	0.0001	0.0001	0.0001	0.0001	0.232457
19	34241090	34255337	-	Acta2	protein_coding	Acta2	ensembl	8	14.4327	13.8623	13.4138	2.90482	3.37937	2.46263	0.38671	0.675624	0.199045	1.33934	1.01302	1.33135
5	142903115	142906755	-	Actb	protein_coding	Actb	ensembl_havana	14	9794.88	9401.05	8342.78	4299.26	4817.47	5318.01	3062.66	2869.75	3277.49	3957.55	2920.16	4483.88
11	120345690	120348543	-	Actg1	protein_coding	Actg1	ensembl_havana	15	2193.83	2285.5	1973.35	2455.39	2354.22	1869.67	1468.53	916.998	1090.43	872.196	1080.8	1650.31
8	46228994	46230118	+	Actg-ps1	processed_pseudogene	Actg-ps1	havana	4	1.73403	4.22403	2.40876	1.61229	1.31219	2.74507	1.20069	1.64809	1.87094	0.757831	0.997892	1.01053
2	154551776	154553277	+	Actl10	protein_coding	Actl10	ensembl_havana	2	0.0001	0.110113	0.561342	0.0001	0.093964	0.0001	0.386696	0.337857	0.447711	0.595256	0.337741	0.0001
3	32706298	32726974	+	Actl6a	protein_coding	Actl6a	ensembl_havana	14	7.47249	8.62592	6.75493	24.7682	22.2694	21.3479	47.0316	45.2674	42.5002	38.057	43.5449	32.1518
4	56743413	56744926	+	Actl7a	protein_coding	Actl7a	ensembl_havana	5	0.805946	0.440153	0.0001	0.0001	0.093964	0.0001	0.055328	0.0001	0.0001	0.0001	0.0563735	0.0001
12	80167547	80260372	-	Actn1	protein_coding	Actn1	ensembl_havana	15	642.272	608.706	466.366	2.96297	3.47494	10.3537	1.21625	1.35266	1.15768	1.93436	1.80166	0.289789
19	4861223	4877910	-	Actn3	protein_coding	Actn3	ensembl_havana	3	0.0001	0.0001	0.0001	0.0001	0.093964	0.0001	0.055328	0.168979	0.248773	0.0001	0.0001	0.0579772
7	28893248	28962341	-	Actn4	protein_coding	Actn4	ensembl_havana	15	250.314	214.487	229.084	175.361	184.043	226.162	268.157	248.641	292.707	293.343	207.321	236.017
12	70937857	70964719	+	Actr10	protein_coding	Actr10	ensembl_havana	6	37.2155	37.0195	42.3739	32.0069	33.885	32.0123	35.5669	36.5342	36.1074	29.6091	34.6646	33.8004
19	46376814	46395736	-	Actr1a	protein_coding	Actr1a	ensembl	4	70.4017	71.8937	66.5634	102.488	116.11	85.0115	101.067	75.1511	83.8525	75.9569	84.2416	92.1406
1	36698114	36714423	-	Actr1b	protein_coding	Actr1b	ensembl_havana	9	29.1571	27.9434	28.399	37.4327	38.6252	34.195	43.2989	41.1501	38.3454	40.8427	37.0844	38.72
11	20062304	20112914	-	Actr2	protein_coding	Actr2	ensembl_havana	7	534.418	729.002	776.252	549.652	516.011	547.281	511.193	465.491	497.05	428.51	608.593	571.254
1	125392905	125435728	-	Actr3	protein_coding	Actr3	ensembl_havana	16	835.269	966.926	1073.25	733.062	725.541	825.999	592.023	572.448	660.082	486.564	633.924	713.292
5	25759997	25850689	+	Actr3b	protein_coding	Actr3b	ensembl_havana	14	0.0001	0.0001	0.0001	1.58948	0.938739	1.34327	1.65694	0.900786	1.69107	0.744045	1.12557	0.578872
2	158624888	158639212	+	Actr5	protein_coding	Actr5	ensembl_havana	16	9.59699	5.94081	8.53098	12.8795	14.0328	13.5437	18.7224	17.3946	17.4569	10.7129	15.0251	15.3954
10	89711971	89732296	-	Actr6	protein_coding	Actr6	ensembl_havana	4	4.98169	6.43587	8.5871	6.46722	5.58501	5.8205	11.1562	10.752	12.1851	5.72848	11.1423	9.02895
14	29978337	30006355	+	Actr8	protein_coding	Actr8	ensembl_havana	5	16.1903	13.8067	13.6383	26.6907	28.7694	26.3039	33.6339	28.0914	28.7965	20.8306	31.9105	33.8584
15	101174067	101213685	+	Acvr1b	protein_coding	Acvr1b	ensembl_havana	11	56.6291	55.7768	44.5066	56.834	62.6543	50.7048	42.5809	36.1401	36.6047	42.4794	39.898	48.9642
2	48814109	48903270	+	Acvr2a	protein_coding	Acvr2a	ensembl_havana	5	5.68049	9.48963	1.50962	7.38985	6.87427	2.22397	3.63966	4.68213	1.89504	2.14128	4.75734	1.81025
9	119402118	119434996	+	Acvr2b	protein_coding	Acvr2b	ensembl_havana	14	0.0001	0.880205	0.0001	2.02793	2.4875	2.51854	2.3749	1.29484	2.48683	1.4136	1.40694	2.83608
15	101128522	101145337	+	Acvrl1	protein_coding	Acvrl1	ensembl_havana	16	335.385	287.404	222.53	16.0035	19.9462	19.6999	5.79904	4.84128	3.08364	6.62121	7.82213	12.5594
9	106432981	106438320	-	Acy1	protein_coding	Acy1	ensembl_havana	13	0.0001	0.825199	0.505218	8.1114	6.66444	4.25347	26.0125	21.9543	22.0822	16.7389	16.3194	9.02894
19	3986661	3990008	+	Acy3	protein_coding	Acy3	ensembl	9	0.293135	1.10023	0.280721	1.22827	1.45499	1.51117	2.27962	1.74518	1.89001	1.56239	1.12557	1.09977
12	85272398	85288439	-	Acyp1	protein_coding	Acyp1	ensembl_havana	15	2.4909	3.96057	4.09717	6.68645	5.35034	8.00314	5.96473	7.26187	5.27196	7.21637	5.23354	4.51453
11	30505991	30649588	-	Acyp2	protein_coding	Acyp2	ensembl_havana	5	0.0001	0.0001	0.0001	0.164518	0.093964	0.72765	0.27624	0.450443	0.348242	0.446467	0.168921	0.173732
2	163726584	163750240	-	Ada	protein_coding	Ada	ensembl_havana	3	13.6995	18.4273	21.4957	1.64428	4.31784	8.11509	6.79314	6.69895	7.51001	5.87727	6.69665	2.37307
2	121140428	121156681	+	Adal	protein_coding	Adal	ensembl_havana	15	1.61179	3.13547	4.09717	9.37195	6.47671	7.84144	14.9669	12.281	13.4941	11.2337	16.6209	15.0156
9	70678997	70780230	+	Adam10	protein_coding	Adam10	ensembl_havana	14	132.379	146.207	174.941	244.273	252.909	259.341	221.357	217.577	239.976	206.74	244.568	257.553
11	102761439	102780263	+	Adam11	protein_coding	Adam11	ensembl_havana	16	0.0001	0.110113	0.0001	0.328937	0.516352	0.112031	1.32557	0.619321	0.646649	1.63678	0.844203	1.09977
3	89338542	89349997	-	Adam15	protein_coding	Adam15	ensembl_havana	17	64.0282	48.5428	53.9764	141.157	140.647	137.196	83.6331	61.9563	77.4278	72.4574	57.1067	117.918
12	21323509	21373633	-	Adam17	protein_coding	Adam17	ensembl_havana	16	57.8522	68.2325	77.1123	131.642	130.993	134.358	113.624	108.981	126.316	109.621	123.542	133.065
11	46055992	46147344	+	Adam19	protein_coding	Adam19	ensembl_havana	16	5.62446	6.32586	6.62276	0.822192	1.77261	2.76193	0.358413	0.496821	0.877804	0.319628	0.900477	1.62066
5	121518576	121545483	-	Adam1a	protein_coding	Adam1a	ensembl_havana	6	3.66832	3.55628	3.85953	1.82675	1.93386	2.18009	2.3904	2.00891	1.40347	1.3011	2.17762	2.10783
14	66027329	66077734	-	Adam2	protein_coding	Adam2	ensembl_havana	6	0.659428	0.988461	0.341254	0.279825	0.571101	1.81386	1.62099	2.25245	1.75122	9.92208	2.01634	0.465733
12	81558584	81568475	-	Adam21	protein_coding	Adam21	ensembl_havana	3	0.0001	0.0001	0.0001	0.219324	0.0001	0.0001	0.055328	0.0563928	0.0001	0.372073	0.0563735	0.0001
5	8072352	8368161	-	Adam22	protein_coding	Adam22	ensembl_havana	17	2.41764	1.92533	2.91856	0.876998	1.22033	0.447823	0.938976	0.39415	0.497445	1.19041	1.35067	0.752504
8	24677225	24725853	-	Adam3	protein_coding	Adam3	ensembl_havana	16	2.56415	2.47539	1.73995	2.30196	1.3142	1.90292	4.74971	3.88431	4.27727	2.08315	3.99552	1.91005
12	81419443	81421947	-	Adam4	protein_coding	Adam4	ensembl_havana	3	0.0001	0.275133	0.112348	1.3389	1.3603	0.692107	1.16245	1.44485	0.753939	0.372073	1.49748	1.91005
8	24727093	24824370	-	Adam5	protein_coding	Adam5	ensembl_havana	18	0.58617	0.0001	0.0001	0.0001	0.0001	0.0001	0.0001	0.0001	0.0001	0.0001	0.168921	0.0001
7	139978932	139992563	-	Adam8	protein_coding	Adam8	ensembl_havana	16	798.094	702.038	566.187	52.9974	51.813	66.7668	5.74382	5.5168	3.82966	8.10911	5.9651	18.7523
8	24949611	25016928	-	Adam9	protein_coding	Adam9	ensembl_havana	15	18.3148	19.6374	18.4089	65.6581	68.4269	58.6521	37.3895	38.3918	40.2849	41.438	46.4819	51.7426
17	33524204	33553783	+	Adamts10	protein_coding	Adamts10	ensembl_havana	17	36.1166	26.2933	29.2408	76.016	77.4846	49.1377	47.5514	44.8092	36.9032	47.0175	41.8676	62.6813
2	26973416	27009629	+	Adamts13	protein_coding	Adamts13	ensembl_havana	16	2.34438	8.3611	5.05128	7.83737	8.0724	4.14154	6.24087	5.74197	4.07833	5.35651	5.79627	5.32481
7	66839735	67153172	+	Adamts17	protein_coding	Adamts17	ensembl_havana	16	0.0001	0.0001	0.0001	0.328937	0.375556	0.0560654	1.71217	2.47698	0.845587	0.892834	1.23812	0.868258
11	50602084	50807574	+	Adamts2	protein_coding	Adamts2	ensembl_havana	8	1.75831	1.37526	1.17871	4.00095	3.61386	1.06344	0.994204	0.225271	0.348242	0.520862	0.112647	0.463118
5	89677087	89883335	-	Adamts3	protein_coding	Adamts3	ensembl_havana	12	0.0001	0.0001	0.0562242	0.767386	0.328624	0.0560654	1.49126	1.18225	0.994791	2.08315	1.18184	1.04189
1	171250421	171260638	+	Adamts4	protein_coding	Adamts4	ensembl_havana	13	0.0001	0.110113	0.112348	0.0001	0.093964	0.0001	0.0001	0.0563928	0.0001	0.223284	0.112647	0.0001
16	85856173	85901829	-	Adamts5	protein_coding	Adamts5	ensembl_havana	6	0.0001	0.220126	0.0562242	0.0001	0.140896	0.0001	0.497152	0.0563928	0.0995691	0.372073	0.619109	0.0001
13	104287835	104496696	+	Adamts6	protein_coding	Adamts6	ensembl_havana	10	0.0001	2.36538	0.954212	13.8661	12.3901	7.27561	20.8763	20.9411	14.0252	14.7302	22.2281	15.164
9	90163069	90208072	+	Adamts7	protein_coding	Adamts7	ensembl_havana	15	0.663173	1.05327	0.791169	0.663913	1.03998	1.07076	0.832158	1.46715	1.30212	0.372863	0.567343	1.04751
2	27079379	27108982	+	Adamtsl2	protein_coding	Adamtsl2	ensembl_havana	14	0.0001	0.0001	0.0001	0.0549061	0.047032	0.0001	0.497152	0.168979	0.0001	0.0744945	0.0001	0.0001
7	82335694	82614451	+	Adamtsl3	protein_coding	Adamtsl3	ensembl_havana	12	1.68505	2.64042	0.39297	0.0001	0.0001	0.223962	0.0001	0.112686	0.149304	0.0001	0.0001	0.0001
3	95676201	95687918	-	Adamtsl4	protein_coding	Adamtsl4	ensembl_havana	11	26.2999	21.2326	12.4036	8.1662	8.44786	11.529	2.70627	3.37767	3.33231	4.38938	3.26396	5.67207
5	139271876	139325623	-	Adap1	protein_coding	Adap1	ensembl_havana	16	33.0398	30.9688	29.2408	74.3716	78.6113	78.0717	81.4619	63.3294	69.5786	57.5813	56.6114	76.282
11	80154105	80178959	+	Adap2	protein_coding	Adap2	ensembl_havana	15	7.84352	9.44545	3.67798	34.6014	28.7498	30.8686	4.95634	5.63161	3.68046	7.29077	8.19903	12.3615
11	80158861	80177630	-	Adap2os	antisense	Adap2os	havana	1	0.654684	1.22603	0.0825391	6.1197	4.71291	2.87877	0.95326	0.67339	0.298507	1.93436	0.804942	1.47137
3	89715022	89753447	+	Adar	protein_coding	Adar	ensembl_havana	16	83.9172	78.8296	79.0106	108.701	107.416	118.863	89.2039	76.2401	88.6071	73.3292	80.8596	109.822
10	77290726	77418271	-	Adarb1	protein_coding	Adarb1	ensembl_havana	15	0.0001	0.110113	0.168473	0.0001	0.0001	0.279927	0.165784	0.225271	0.397976	0.0001	0.168921	0.173732
8	111966908	111992303	-	Adat1	protein_coding	Adat1	ensembl_havana	17	0.58617	1.54028	0.729715	3.12405	3.75466	3.74978	6.95883	9.34471	6.36612	7.14198	4.55826	4.80391
10	13552894	13563377	+	Adat2	protein_coding	Adat2	ensembl_havana	8	2.4909	3.43152	2.49212	4.07773	3.88328	3.07577	6.78266	6.28829	4.37816	3.79422	5.45863	3.29903
10	80602880	80607655	+	Adat3	protein_coding	Adat3	ensembl_havana	1	0.622516	0.0001	0.000101232	0.0147008	0.580226	0.0001	0.637105	0.47866	0.589707	0.0001	0.000735538	0.655919
12	88360554	88461725	+	Adck1	protein_coding	Adck1	ensembl_havana	15	1.90483	2.80543	3.64817	10.0651	12.71	10.3537	15.1878	9.47867	12.8813	8.1835	9.38177	10.9968
6	39573873	39588770	+	Adck2	protein_coding	Adck2	ensembl_havana	12	14.9799	17.7122	13.2856	20.106	22.9029	19.5321	19.2195	16.8872	20.8388	14.3582	15.9818	18.1736
15	76576358	76595817	+	Adck5	protein_coding	Adck5	ensembl_havana	18	1.31876	0.534746	1.24226	3.72075	3.6738	4.22825	10.7881	7.99371	7.17486	5.35651	6.85166	5.82344
1	165485183	165576775	+	Adcy10	protein_coding	Adcy10	ensembl_havana	16	5.4945	3.85056	0.898088	0.0001	0.047032	0.0001	0.055328	0.0563928	0.248773	0.0001	0.0563735	0.0001
12	4133103	4213526	+	Adcy3	protein_coding	Adcy3	ensembl_havana	15	12.5957	9.82043	12.9072	23.3725	23.2493	20.7534	26.1922	20.5251	27.9229	15.6491	17.3732	13.9422
14	55769057	55784096	-	Adcy4	protein_coding	Adcy4	ensembl_havana	14	4.54214	7.75603	5.16353	1.64428	2.58136	1.56713	1.60171	1.29484	1.5916	0.744045	0.337741	0.752504
16	35154877	35305739	+	Adcy5	protein_coding	Adcy5	ensembl_havana	9	0.0001	0.330139	0.449094	0.383743	0.187828	0.279927	0.055328	0.39415	0.0995691	0.0744945	0.337741	0.115854
15	98589973	98610077	-	Adcy6	protein_coding	Adcy6	ensembl_havana	9	0.293135	0.110113	0.336845	3.39807	3.87807	1.92811	6.85341	5.55964	8.10553	7.88592	5.78341	6.48235
8	88272403	88329963	+	Adcy7	protein_coding	Adcy7	ensembl_havana	13	89.2298	84.7099	78.5181	308.285	297.186	206.515	175.402	148.782	131.399	175.498	186.658	214.436
16	4287529	4420499	-	Adcy9	protein_coding	Adcy9	ensembl_havana	11	16.41	16.172	11.5617	15.8939	11.8739	16.4539	8.56045	8.6692	6.86346	6.62121	7.70958	10.3601
5	34573664	34632309	+	Add1	protein_coding	Add1	ensembl_havana	14	349.96	345.394	274.057	147.538	163.184	154.073	140.059	118.44	120.458	137.184	134.268	151.117
6	86028681	86124410	+	Add2	protein_coding	Add2	ensembl_havana	10	0.0001	0.495159	0.336845	0.0001	0.187828	0.0001	0.055328	0.225271	0.0001	0.520862	0.0001	0.231609
19	53140445	53247400	+	Add3	protein_coding	Add3	ensembl	14	410.749	458.479	346.22	359.182	360.579	312.675	163.475	159.475	144.13	187.181	189.141	287.714
10	10335703	10472327	-	Adgb	protein_coding	Adgb	ensembl_havana	20	1.39202	1.10023	1.29096	2.57599	3.00375	1.67906	1.93308	0.957079	2.08895	0.297678	0.900477	0.578872
8	27085583	27123437	+	Adgra2	protein_coding	Adgra2	ensembl_havana	15	0.952463	0.990218	0.112348	1.69909	1.74005	2.09384	2.93326	1.76199	3.53852	3.56296	1.97436	2.95184
15	74516195	74589466	+	Adgrb1	protein_coding	Adgrb1	ensembl_havana	17	1.53853	0.935212	1.40321	0.109712	0.093964	0.279927	0.055328	0.0001	0.0001	0.297678	0.0001	0.0001
5	129096750	129204600	+	Adgrd1	protein_coding	Adgrd1	ensembl_havana	16	0.0001	0.0001	0.168473	0.219324	0.281692	0.335892	1.43603	2.3644	2.83497	1.19041	0.394015	0.694627
17	57358691	57483528	+	Adgre1	protein_coding	Adgre1	ensembl_havana	15	11.0622	14.0268	21.4395	201.463	198.942	169.35	67.0468	60.7393	71.7681	62.566	68.9921	153.722
17	55749984	55853663	+	Adgre4	protein_coding	Adgre4	ensembl_havana	6	0.439652	0.220126	0.617467	8.33063	9.05797	15.6144	0.497152	0.7882	0.0995691	0.744045	0.731656	0.347363
8	83723251	83741327	-	Adgre5	protein_coding	Adgre5	ensembl_havana	14	348.731	325.482	295.401	721.65	761.308	666.851	260.93	240.544	222.698	297.422	294.277	464.025
17	43270329	43324738	+	Adgrf1	protein_coding	Adgrf1	ensembl_havana	5	0.0001	0.0001	0.0001	0.109712	0.047032	0.0001	0.221012	0.337857	0.298507	0.0744945	0.506562	0.0001
17	43360451	43459558	+	Adgrf5	protein_coding	Adgrf5	ensembl_havana	6	0.0001	0.0001	0.0001	0.109712	0.140896	0.0001	0.110556	0.39415	0.0001	0.148889	0.112647	0.0001
8	94974751	95014218	+	Adgrg1	protein_coding	Adgrg1	ensembl_havana	16	1.09898	3.02546	2.13282	11.2902	14.7837	13.8236	51.4726	46.3854	58.7864	37.7926	29.9939	22.5723
X	160390690	160498071	+	Adgrg2	protein_coding	Adgrg2	ensembl_havana	15	0.0001	0.0001	0.0001	0.274131	0.187828	0.0001	0.221012	0.112686	0.0001	0.0001	0.0563735	0.0001
8	95017692	95045251	+	Adgrg3	protein_coding	Adgrg3	ensembl_havana	7	221.165	188.618	194.075	110.598	104.47	126.65	342.748	265.479	341.467	232.41	235.95	187.29
8	94923694	94943281	+	Adgrg5	protein_coding	Adgrg5	ensembl_havana	12	0.0001	0.0001	0.0001	5.97397	4.74023	1.79099	1.49126	1.12596	0.248773	1.85996	1.35067	2.08368
10	14402583	14545660	-	Adgrg6	protein_coding	Adgrg6	ensembl_havana	6	0.805946	0.0001	0.280721	2.85002	2.86295	5.70857	1.87785	0.7882	2.7355	1.56239	1.0693	3.93575
8	83900105	83941955	+	Adgrl1	protein_coding	Adgrl1	ensembl_havana	16	0.805946	0.447399	0.617467	12.2891	9.37587	6.80421	37.8747	28.9863	27.661	33.1386	27.2588	17.1055
3	151437887	151545087	+	Adgrl4	protein_coding	Adgrl4	ensembl_havana	11	0.219876	0.550166	1.17871	1.04142	0.610216	0.839581	3.42424	3.37767	4.37674	1.4136	0.562835	0.636749
13	81095068	81633155	-	Adgrv1	protein_coding	Adgrv1	ensembl_havana	14	8.05856	15.0719	8.3065	8.8787	6.61752	2.23872	6.40656	6.92413	2.18842	4.46377	8.77878	2.31519
3	138443093	138455500	+	Adh5	protein_coding	Adh5	ensembl_havana	8	12.3076	14.3018	16.22	36.2818	43.0367	39.5116	61.8553	57.0245	57.1947	43.6697	49.6331	46.4757
1	9547948	9580674	+	Adhfe1	protein_coding	Adhfe1	ensembl_havana	14	3.00371	2.90315	4.71454	2.74041	1.68965	3.58189	1.7688	1.91406	3.68045	1.56239	1.81303	1.79429
12	28675231	28682176	+	Adi1	protein_coding	Adi1	ensembl_havana	12	1.31876	1.43027	2.75019	18.4698	17.4119	15.6144	44.7346	44.0772	48.1431	31.2458	40.3484	23.6141
16	23146536	23158029	+	Adipoq	protein_coding	Adipoq	ensembl_havana	5	0.0001	0.0551066	0.0001	0.274131	0.140896	0.0001	0.165784	0.112686	0.149304	0.223284	0.0001	0.0001
1	134415378	134433352	+	Adipor1	protein_coding	Adipor1	ensembl_havana	14	414.138	412.679	367.126	211.444	207.867	214.964	131.832	119.117	139.751	111.667	96.3958	154.126
6	119353150	119417705	-	Adipor2	protein_coding	Adipor2	ensembl_havana	13	181.024	189.057	201.597	179.875	189.036	193.25	196.337	183.292	184.765	191.046	202.138	207.434
14	21052574	21448570	+	Adk	protein_coding	Adk	ensembl_havana	10	4.39562	6.65589	7.184	14.0853	13.2819	11.6969	25.3497	25.163	28.3488	23.8063	25.9985	16.1478
2	168180986	168207113	-	Adnp	protein_coding	Adnp	ensembl_havana	15	31.403	36.4366	44.4171	43.8809	31.7007	41.3422	66.3979	51.1488	72.9492	32.3708	75.5904	78.0009
18	80126311	80151483	-	Adnp2	protein_coding	Adnp2	ensembl_havana	10	48.2776	38.5597	42.2616	27.1839	35.6215	34.139	46.9439	36.309	45.2088	33.7008	35.2273	36.1155
10	67544511	67548956	-	Ado	protein_coding	Ado	ensembl_havana	5	12.3076	9.02118	13.4699	26.4166	29.4265	25.8002	47.5514	39.2925	40.6332	32.2873	35.7338	33.974
1	134199223	134235432	-	Adora1	protein_coding	Adora1	ensembl_havana	8	1.02311	0.0001	0.0562242	0.0001	0.0001	0.0001	0.0001	0.0001	0.0001	0.0001	0.112647	0.0001
10	75316877	75334785	+	Adora2a	protein_coding	Adora2a	ensembl_havana	6	0.0001	0.0001	0.0001	0.383743	0.844876	0.615719	0.331468	0.112686	0.348242	0.446467	0.112647	0.0001
11	62248984	62266454	+	Adora2b	protein_coding	Adora2b	ensembl_havana	2	0.0001	0.0001	0.0001	5.53552	3.52	3.02223	1.10466	0.619321	0.397976	1.26481	0.450288	1.33128
3	105870858	105908927	+	Adora3	protein_coding	Adora3	ensembl_havana	5	3.15022	2.99886	2.56216	11.6751	17.7066	14.466	4.88049	3.93756	4.6921	5.16691	7.53255	19.4468
9	59291558	59324053	+	Adpgk	protein_coding	Adpgk	ensembl_havana	11	1758.87	1920.88	1667.75	65.9047	66.1977	166.677	50.3523	45.1681	65.1315	39.5037	40.6658	42.4561
16	38444030	38452704	-	Adprh	protein_coding	Adprh	ensembl_havana	9	62.7095	66.6131	61.4562	38.1451	45.7588	49.5295	47.3858	42.3887	50.3315	49.7701	37.1406	46.707
4	126316047	126321704	-	Adprhl2	protein_coding	Adprhl2	ensembl_havana	16	2.71067	3.90557	3.64818	12.167	13.7981	11.1932	18.7224	16.4939	16.3628	13.8375	14.5749	13.6591
11	67037905	67052595	-	Adprm	protein_coding	Adprm	ensembl_havana	16	17.0694	16.9971	16.5006	12.5507	14.9714	13.3758	15.1878	12.0468	14.6718	9.07623	12.0989	15.8006
18	62177817	62179960	-	Adrb2	protein_coding	Adrb2	ensembl	3	17.7287	19.1974	15.3781	32.5001	26.9391	21.8266	12.1503	8.89437	5.12276	11.0105	11.8738	11.4019
2	180171485	180176287	+	Adrm1	protein_coding	Adrm1	ensembl_havana	15	11.9715	13.9538	15.7277	24.0952	22.3718	16.918	33.1894	26.8466	31.1777	11.7916	18.1354	24.1243
15	80948490	80970947	+	Adsl	protein_coding	Adsl	ensembl_havana	10	4.2491	4.29061	5.89315	15.291	20.6971	16.5659	41.642	36.1964	38.5444	29.7579	32.9764	20.6623
1	177762962	177796512	-	Adss	protein_coding	Adss	ensembl_havana	8	25.5674	27.7784	42.2616	105.284	106.208	77.0645	156.904	155.593	133.341	128.108	175.859	116.449
12	112620045	112641361	+	Adssl1	protein_coding	Adssl1	ensembl_havana	14	69.962	66.8332	59.604	97.1167	103.44	100.57	147.625	126.208	142.589	112.484	98.4227	92.3723
13	41763148	41847685	-	Adtrp	protein_coding	Adtrp	ensembl_havana	14	9.01092	9.68126	11.9546	0.164518	0.797944	0.671685	0.221012	0.168979	0.0498345	0.0744945	0.0563735	0.0001
11	5861947	5872089	+	Aebp1	protein_coding	Aebp1	ensembl_havana	13	0.366393	0.16512	0.0001	0.0549061	0.047032	0.0001	0.165784	0.281564	0.0995691	0.0744945	0.225194	0.0001
6	140622663	140678473	+	Aebp2	protein_coding	Aebp2	ensembl_havana	18	13.4797	19.8025	31.0368	44.5575	44.2569	48.2423	84.9958	83.3693	85.2951	67.4016	81.7091	69.4528
7	78895854	78911210	+	Aen	protein_coding	Aen	ensembl_havana	18	4.98169	4.40063	6.62276	19.1822	21.1195	17.4053	35.1805	33.7195	34.8642	16.6645	24.8731	20.3729
10	81559488	81566363	+	Aes	protein_coding	Aes	ensembl_havana	10	217.43	201.765	173.256	111.86	121.272	154.408	143.813	135.16	147.065	150.427	116.824	151.985
5	35893319	36003924	+	Afap1	protein_coding	Afap1	ensembl_havana	12	15.1647	19.5274	23.011	34.9664	29.2857	38.0005	77.0432	65.0185	112.847	36.1558	30.8943	24.5979
18	61730261	61786703	-	Afap1l1	protein_coding	Afap1l1	ensembl_havana	15	0.952463	1.26525	1.34708	17.9217	19.8307	15.8942	31.1509	29.385	26.8538	33.7752	27.868	35.3476
17	13760539	13906151	+	Afdn	protein_coding	Afdn	ensembl_havana	15	0.0001	0.220126	0.168473	0.0001	0.0001	0.0001	0.0600696	0.0001	0.0001	0.0001	0.0563735	0.0579772
5	103692374	103855323	+	Aff1	protein_coding	Aff1	ensembl_havana	18	370.984	322.611	392.58	155.923	160.836	251.902	212.408	205.017	289.552	197.667	175.742	214.144
1	38177326	38664956	-	Aff3	protein_coding	Aff3	ensembl_havana	17	0.0733587	0.0001	0.280721	0.219324	0.751012	0.0001	13.1444	11.3713	3.82966	9.96898	11.9864	0.810381
11	53350833	53421831	+	Aff4	protein_coding	Aff4	ensembl_havana	13	91.6465	110.509	108.769	90.485	82.8822	87.8657	87.0947	78.0784	74.7012	66.2857	89.8127	84.6165
10	42312585	42478566	-	Afg1l	protein_coding	Afg1l	ensembl_havana	14	1.61179	0.220126	1.12258	2.52118	3.28534	2.79837	3.70038	2.75845	3.18311	3.27346	2.7575	5.0933
8	123477903	123503917	+	Afg3l1	protein_coding	Afg3l1	ensembl_havana	15	18.6811	21.5626	17.2864	38.2547	36.5132	32.1801	59.4252	53.0842	55.2554	45.7525	47.4388	37.4468
18	67404767	67449167	-	Afg3l2	protein_coding	Afg3l2	ensembl	9	16.5566	16.9971	22.3375	34.8568	31.0691	28.1507	53.5713	51.0577	53.5145	41.8842	45.0752	35.8261
11	117825924	117839909	+	Afmid	protein_coding	Afmid	ensembl_havana	15	7.76376	8.45926	3.48534	5.66054	4.95323	2.74412	12.9161	7.14821	7.04442	7.55449	6.64669	6.07621
11	20685084	20741590	-	Aftph	protein_coding	Aftph	ensembl_havana	15	70.3286	83.6099	81.4924	95.6916	89.734	104.04	85.5484	80.8931	93.1028	93.7371	99.2666	91.5043
8	53511727	53523422	+	Aga	protein_coding	Aga	ensembl_havana	5	9.45047	7.48099	8.02587	13.866	16.1916	13.152	13.5862	15.0866	16.4125	15.3998	14.8563	15.8006
1	89454806	89897618	+	Agap1	protein_coding	Agap1	ensembl_havana	15	177.798	156.163	148.392	13.1536	13.892	29.2141	17.673	18.6893	17.4569	9.44821	11.4799	11.807
10	127075284	127093170	+	Agap2	protein_coding	Agap2	ensembl_havana	9	98.0198	85.2045	79.4719	39.9538	41.3942	48.4105	48.7107	43.5708	59.7812	44.8598	39.1664	49.2536
5	24452177	24502048	+	Agap3	protein_coding	Agap3	ensembl_havana	14	3.80955	4.95069	7.12788	19.7851	18.6321	18.5806	26.4543	20.0966	25.8621	18.8219	14.8563	22.5143
2	90782727	90834438	+	Agbl2	protein_coding	Agbl2	ensembl_havana	14	0.0001	0.220126	0.0001	0.0001	0.0001	0.0001	0.0001	0.281564	0.298507	0.0001	0.225194	0.0579772
6	34780432	34859460	+	Agbl3	protein_coding	Agbl3	ensembl_havana	15	0.293135	0.935212	1.23483	2.08273	1.3142	1.00748	4.74971	2.92733	2.28789	1.11602	3.20769	0.868258
5	30888694	30906966	+	Agbl5	protein_coding	Agbl5	ensembl_havana	17	15.4878	11.1649	12.6466	14.7741	14.3388	12.294	25.4137	21.9752	31.7477	22.6352	20.6132	24.0915
17	34597862	34600937	+	Ager	protein_coding	Ager	ensembl_havana	14	5.27473	7.04094	8.53098	3.23366	3.00375	3.69382	3.25855	2.02664	2.63603	4.0174	2.41986	2.37307
1	82839483	82901183	+	Agfg1	protein_coding	Agfg1	ensembl_havana	13	84.1743	86.5808	109.274	85.2235	89.8285	75.0497	83.118	74.3633	83.1559	63.1612	81.597	84.9642
5	137650463	137684727	-	Agfg2	protein_coding	Agfg2	ensembl_havana	15	14.5053	12.1015	11.5056	23.457	25.3902	23.1139	24.4661	16.7754	24.6187	23.8808	18.5141	23.0932
13	95350683	95375353	-	Aggf1	protein_coding	Aggf1	ensembl_havana	8	39.1935	46.6456	53.0934	41.4881	40.972	50.8167	59.425	54.6043	65.003	54.0851	59.3682	42.6558
6	40325172	40396763	+	Agk	protein_coding	Agk	ensembl_havana	11	5.27472	3.7955	2.33239	6.96802	7.79614	6.3544	20.5553	15.8481	18.1297	12.052	13.36	14.8792
3	116739999	116808167	-	Agl	protein_coding	Agl	ensembl_havana	14	186.078	206.268	174.379	75.9061	78.7046	75.8332	70.6368	62.7102	59.3334	70.4518	66.7405	65.5171
4	126435012	126468584	-	Ago1	protein_coding	Ago1	ensembl_havana	16	22.0892	25.4173	28.7494	54.4504	52.8372	52.9625	75.4869	66.9532	71.7046	63.5457	59.4037	65.0998
15	73095844	73184936	-	Ago2	protein_coding	Ago2	ensembl_havana	11	295.303	279.378	322.994	218.541	209.69	240.431	269.507	232.598	246.576	232.706	219.805	254.704
4	126331704	126429557	-	Ago3	protein_coding	Ago3	ensembl_havana	15	20.9138	22.8787	27.0383	51.4898	48.0199	46.1523	51.0956	50.3611	51.6869	50.5754	58.4895	63.0402
4	126489541	126533473	-	Ago4	protein_coding	Ago4	ensembl_havana	11	15.6042	17.9322	17.2302	29.5954	30.7875	28.0388	23.5272	20.6611	24.0716	23.0624	23.8038	28.9387
17	34604262	34613450	+	Agpat1	protein_coding	Agpat1	ensembl_havana	17	87.0995	56.9844	52.1761	45.9042	49.3166	48.3472	54.544	43.5688	51.2147	55.7958	38.435	55.0368
2	26593057	26604418	-	Agpat2	protein_coding	Agpat2	ensembl_havana	13	108.204	88.395	100.625	16.6611	13.845	25.8	13.6414	10.6395	19.1976	6.24924	8.72249	12.5016
10	78269178	78352490	-	Agpat3	protein_coding	Agpat3	ensembl_havana	15	0.879204	1.81532	0.561342	17.3188	16.7548	13.7676	8.72612	7.31817	6.61479	11.3081	9.17269	11.6913
17	12118704	12219646	+	Agpat4	protein_coding	Agpat4	ensembl_havana	8	6.59338	7.75603	2.91856	13.7016	15.8631	16.286	3.03764	2.64586	3.08364	2.15754	3.43279	5.61419
8	18846277	18891362	+	Agpat5	protein_coding	Agpat5	ensembl_havana	10	11.4119	8.63613	17.118	30.0882	29.0511	41.6944	65.3342	63.7793	77.4361	52.0021	55.148	46.1862
2	75832177	75931351	+	Agps	protein_coding	Agps	ensembl_havana	16	115.529	133.501	177.859	155.923	131.223	158.046	244.992	208.676	263.492	122.899	168.484	143.593
4	156165290	156197489	-	Agrn	protein_coding	Agrn	ensembl_havana	18	58.6071	39.2198	35.8073	18.7986	17.2241	28.5985	12.4264	9.4573	16.0643	10.5641	7.48448	17.2475
8	105566698	105637394	-	Agrp	protein_coding	Agrp	ensembl_havana	10	0.0001	0.0001	0.0001	0.0001	0.372185	0.066251	0.0001	0.0001	0.0001	0.0001	0.112647	0.0001
8	124556534	124569707	-	Agt	protein_coding	Agt	ensembl_havana	9	0.0001	0.0001	0.0562242	0.0001	0.0001	0.112031	0.0001	0.0001	0.0001	0.0001	0.0563735	0.405241
13	59445742	59585228	-	Agtpbp1	protein_coding	Agtpbp1	ensembl_havana	15	68.1305	72.2785	74.7577	63.4108	63.6867	62.7933	75.7729	75.2072	73.9056	79.2301	83.904	79.1761
4	148077061	148088032	-	Agtrap	protein_coding	Agtrap	ensembl_havana	8	120.144	99.7271	105.514	73.6596	78.705	79.191	74.9998	71.8299	76.6907	70.9725	66.1778	62.7969
1	179744894	179803681	-	Ahctf1	protein_coding	Ahctf1	ensembl_havana	13	41.9773	43.0152	52.7007	60.7254	55.6147	65.9273	110.015	106.225	99.4148	68.964	95.553	77.4401
2	155059310	155074498	-	Ahcy	protein_coding	Ahcy	ensembl_havana	15	0.000107141	3.50969	1.44065	23.2891	20.3311	13.0783	95.8098	66.9374	70.504	55.4518	54.3019	31.8101
3	107663118	107696561	-	Ahcyl1	protein_coding	Ahcyl1	ensembl_havana	14	37.9481	47.8009	48.6598	77.4411	75.326	59.0996	140.832	123.394	125.232	89.9429	125.433	92.4879
6	29768011	29912311	+	Ahcyl2	protein_coding	Ahcyl2	ensembl_havana	17	12.2343	14.1918	15.4904	73.8629	71.1351	69.0611	44.1272	38.4964	44.9602	30.1299	44.85	65.4016
4	133011260	133078111	+	Ahdc1	protein_coding	Ahdc1	ensembl_havana	14	7.1062	6.38087	5.16353	10.4133	8.82331	12.2006	10.2173	10.358	11.103	17.252	10.4107	13.5434
10	20952547	21080430	+	Ahi1	protein_coding	Ahi1	ensembl_havana	17	6.30035	5.66578	7.07175	6.79606	5.7258	6.82788	12.813	11.3713	12.8316	10.2666	13.8434	8.68169
19	8989284	9076920	+	Ahnak	protein_coding	Ahnak	ensembl	12	49.8893	67.9882	39.1187	2998.43	2850.99	3041.48	751.875	770.256	670.869	1023.75	1368.01	2804.97
12	112772194	112802658	-	Ahnak2	protein_coding	Ahnak2	ensembl_havana	4	0.0001	0.0001	0.112348	0.657773	0.657148	0.895546	0.110556	0.225271	0.199038	0.446467	0.394015	0.810381
13	74211118	74292332	-	Ahrr	protein_coding	Ahrr	ensembl_havana	16	0.0001	0.0001	0.0001	2.13754	2.76909	1.17537	0.662836	0.39415	0.596914	0.297678	1.01302	2.0258
12	87266479	87273999	+	Ahsa1	protein_coding	Ahsa1	ensembl_havana	7	24.178	26.0046	34.1146	54.5301	57.156	54.4953	88.6048	78.487	106.001	49.2261	70.1518	57.6117
11	23487882	23498031	-	Ahsa2	protein_coding	Ahsa2	ensembl_havana	13	9.77684	18.8173	18.1827	18.7828	18.1158	25.2193	21.2314	18.6192	25.178	18.6075	18.8371	24.9809
2	35081861	35101544	-	AI182371	protein_coding	AI182371	ensembl_havana	15	4.68865	1.59529	0.898088	1.20583	1.54886	0.559754	1.10466	1.40742	0.54718	0.223284	1.18184	0.868259
17	27563573	27565757	-	AI413582	protein_coding	AI413582	ensembl_havana	14	6.23989	5.91202	5.62312	13.7429	12.6429	12.2817	12.137	10.0787	10.0593	6.44568	7.62881	11.6084
4	53261356	53270233	-	AI427809	lincRNA	AI427809	ensembl_havana	2	0.0001	0.0001	0.0001	0.0549061	0.0001	0.279927	0.662836	0.619321	0.497445	0.669651	1.12557	0.173732
12	76546972	76547944	-	AI463170	antisense	AI463170	havana	1	0.879189	0.715172	0.0909817	0.109712	0.0001	0.112031	0.0001	0.0563928	0.0001	0.0001	0.0596887	0.0001
13	37657022	37667735	-	AI463229	lincRNA	AI463229	havana	1	0.0001	0.0551066	0.224597	0.164518	0.093964	0.0560654	0.165784	0.112686	0.298507	0.223284	0.0563735	0.0001
4	41495604	41503077	-	AI464131	protein_coding	AI464131	ensembl_havana	4	0.439652	0.605172	0.336845	5.04226	4.97489	2.07082	8.61567	6.41748	4.12807	9.00184	7.03429	3.76212
7	127091359	127093987	+	AI467606	protein_coding	AI467606	ensembl_havana	6	161.095	123.601	127.345	58.0398	60.6834	70.7403	47.4409	45.8789	52.8184	60.1852	53.4598	68.8743
5	123133723	123141667	-	AI480526	lincRNA	AI480526	havana	7	13.6901	15.2251	10.3529	21.2892	17.5088	10.1294	15.2204	15.4898	10.5254	25.24	18.4183	16.0962
4	59043753	59138984	-	AI481877	protein_coding	AI481877	ensembl_havana	9	0.0001	0.0001	0.0001	0.164518	0.0001	0.0001	0.110556	0.0563928	0.149304	0.0001	0.168921	0.0001
3	107039504	107054348	+	AI504432	lincRNA	AI504432	ensembl_havana	5	0.0001	1.21024	1.06646	23.7311	16.8487	24.457	31.1487	33.2692	30.3382	33.4776	63.139	60.0767
5	23698296	23712668	-	AI506816	processed_transcript	AI506816	havana	4	19.0123	14.1482	25.4018	93.3852	101.616	105.292	467.144	417.777	448.934	345.205	355.317	220.77
4	141614026	141615605	+	AI507597	antisense	AI507597	ensembl_havana	12	0.0001	0.000100008	0.0001	0.275262	0.0520443	0.000539607	0.0351239	0.159899	0.000188906	0.0001	0.44102	0.0001
9	52673042	52679781	-	AI593442	protein_coding	AI593442	ensembl_havana	3	0.146617	0.0001	0.0562242	0.0549061	0.0001	0.0560654	0.110556	0.225271	0.0995691	0.223284	0.0563735	0.0001
1	43098710	43115948	+	AI597479	protein_coding	AI597479	ensembl_havana	7	5.27473	11.2214	12.6281	15.7295	13.188	10.9693	23.0854	18.0138	18.3024	11.1593	21.2152	15.6848
19	41593363	41596159	+	AI606181	protein_coding	AI606181	havana	3	7.32597	9.35122	8.13811	7.67296	8.96411	5.70857	7.17974	5.96714	4.62541	3.05028	5.51491	5.96145
17	47436615	47470639	+	AI661453	protein_coding	AI661453	ensembl_havana	14	0.58617	0.825199	0.39297	0.328937	0.70408	0.167996	1.04943	0.957078	0.298507	0.595256	0.506562	0.347363
11	83223576	83226605	+	AI662270	processed_transcript	AI662270	havana	8	25.8258	32.3926	42.4954	94.1518	105.916	108.198	173.266	163.607	205.331	143.621	168.472	136.437
19	5425157	5427314	+	AI837181	protein_coding	AI837181	ensembl_havana	9	32.4537	20.5176	18.6895	28.1704	26.2351	23.0579	27.7246	21.6166	27.5033	25.5174	17.3886	23.2088
5	31569595	31571398	-	AI839979	lincRNA	AI839979	havana	1	5.4945	6.76591	11.0005	67.1923	62.2791	56.1333	20.7658	16.8879	18.949	18.9707	23.8038	49.1379
3	88199102	88204596	-	AI849053	lincRNA	AI849053	havana	1	0.0001	0.0001	0.0001	0.0001	0.0001	0.0001	0.055328	0.0563928	0.0001	0.148889	0.394015	0.0001
6	48626764	48633690	+	AI854703	protein_coding	AI854703	ensembl_havana	14	0.0001	0.0001	0.0001	0.109712	0.0001	0.0001	0.55238	0.39415	0.0995691	0.446467	0.225194	0.0001
7	41372923	41393380	-	AI987944	protein_coding	AI987944	ensembl_havana	10	14.3598	16.2788	19.0126	15.5054	16.0889	19.5141	17.0263	20.045	18.0117	21.3555	26.0622	17.9089
6	122553801	122564181	+	Aicda	protein_coding	Aicda	ensembl_havana	14	7.619	6.93052	6.56664	0.109712	0.291414	0.179588	0.0001	0.112686	0.0001	0.0744945	0.0563735	0.0001
1	183296590	183325477	+	Aida	protein_coding	Aida	ensembl_havana	10	6.91208	9.03335	17.6792	61.0803	63.4427	56.0763	39.2331	40.9956	40.2866	38.0571	45.2818	52.3579
17	35170991	35176069	-	Aif1	protein_coding	Aif1	ensembl_havana	14	0.58617	0.440153	0.561342	15.4007	16.0978	24.345	4.30788	4.95387	4.72488	6.02606	4.16434	14.9903
X	48474944	48513564	-	Aifm1	protein_coding	Aifm1	ensembl_havana	14	11.1354	12.8166	13.3577	23.4023	24.0762	21.7147	40.0957	38.5044	37.0026	29.6835	41.2486	30.6171
10	61715263	61739261	+	Aifm2	protein_coding	Aifm2	ensembl_havana	15	32.4374	24.123	20.9665	44.9163	40.8214	28.73	14.9094	13.1164	14.4235	11.46	12.3528	16.9647
10	13647054	13868981	-	Aig1	protein_coding	Aig1	ensembl_havana	13	0.0733587	0.16512	0.0001	1.42506	1.45499	1.84696	1.93308	1.97035	1.19373	0.967229	1.68831	1.91005
1	173350879	173466041	+	Aim2	protein_coding	Aim2	ensembl_havana	15	16.9229	30.7488	26.8837	120.026	111.509	81.8771	91.7879	103.015	80.6191	83.6934	120.146	93.2411
3	132660499	132684371	-	Aimp1	protein_coding	Aimp1	ensembl_havana	10	7.69226	12.5966	13.2454	21.3196	22.4805	21.6028	29.7128	35.0142	33.2227	34.8911	36.1278	26.1606
5	143902704	143909848	-	Aimp2	protein_coding	Aimp2	ensembl_havana	13	4.01036	2.0733	3.04719	4.08126	6.05667	6.21047	14.8558	15.6896	20.2145	10.1212	9.56771	8.28913
19	4114446	4125859	-	Aip	protein_coding	Aip	ensembl_havana	14	37.9481	40.2098	34.5726	34.2542	37.499	35.762	24.1346	24.2624	30.4874	18.7475	20.5399	32.7008
11	72027963	72037510	-	Aipl1	protein_coding	Aipl1	ensembl_havana	10	0.146617	0.220126	0.0001	0.109712	0.751012	0.279927	0.773292	0.563028	0.795852	0.892835	0.900477	0.115854
10	78030022	78043611	-	Aire	protein_coding	Aire	ensembl_havana	15	0.293135	0.0001	0.0562242	0.328937	0.610216	0.0001	0.82852	0.39415	0.0498345	0.297678	0.506562	0.347363
17	12741311	12860137	+	Airn	antisense	Airn	havana	4	1.09898	2.31038	0.336845	0.0001	0.140896	0.0001	0.221012	0.7882	0.0001	0.0001	0.0001	0.0001
2	25575416	25581758	-	Ajm1	protein_coding	Ajm1	ensembl_havana	8	0.439652	0.415343	0.0120822	0.548161	0.354388	0.503789	1.53263	0.675166	0.0578753	1.08438	0.447326	0.115854
14	54567472	54577559	-	Ajuba	protein_coding	Ajuba	ensembl_havana	11	0.0001	0.110113	0.280721	0.438549	0.46942	0.0560654	0.662836	0.619321	0.248773	0.520862	0.562835	0.463118
2	32621758	32635059	+	Ak1	protein_coding	Ak1	ensembl_havana	14	0.512911	0.0001	0.0001	0.219324	0.516352	0.279927	2.20922	1.12596	1.04453	0.669651	1.0693	0.636749
13	21495223	21497147	+	AK157302	protein_coding	AK157302	havana	3	0.907576	0.153023	1.44333	0.308461	0.552198	1.96372	0.0001	1.29473	0.795709	2.28063	0.149015	0.786445
4	128991958	129011530	+	Ak2	protein_coding	Ak2	ensembl_havana	14	99.339	98.0213	96.6456	41.4336	43.1306	57.0287	82.6214	85.7338	86.638	74.0225	68.1474	46.1862
19	29020833	29047962	-	Ak3	protein_coding	Ak3	ensembl_havana	7	7.39314	7.6784	7.82034	7.56065	5.65868	4.98369	8.68632	6.27134	5.22223	4.24834	10.1238	6.10765
3	152462815	152668361	-	Ak5	protein_coding	Ak5	ensembl_havana	11	0.0001	0.0551066	0.0562242	0.0001	0.093964	0.0001	0.055328	0.0001	0.0001	0.148889	0.225194	0.231609
13	100650979	100666360	+	Ak6	protein_coding	Ak6	ensembl_havana	9	22.5391	18.8073	36.7464	46.8567	46.8909	48.4281	94.4375	90.0698	94.5871	71.9734	76.4351	68.3106
2	28700164	28813166	+	Ak8	protein_coding	Ak8	ensembl_havana	8	1.2455	0.16512	0.224597	2.02793	2.58136	3.13416	1.54648	1.5763	1.93975	2.08315	1.9134	4.51452
10	41303980	41434535	+	Ak9	protein_coding	Ak9	havana	5	1.75831	1.10023	0.39297	0.0001	0.093964	0.0001	0.0001	0.0001	0.0001	0.372073	0.0001	0.0001
11	88830792	88864587	-	Akap1	protein_coding	Akap1	ensembl_havana	15	1.02572	0.935212	3.36756	12.6055	15.7693	17.2934	44.0168	35.2958	52.8679	26.1126	31.7384	22.5143
11	61871307	61930253	-	Akap10	protein_coding	Akap10	ensembl_havana	15	27.3988	28.3285	31.2613	72.6184	62.9355	50.3131	71.6859	62.2597	62.2176	44.4879	64.6585	71.6516
14	78492246	78536809	-	Akap11	protein_coding	Akap11	ensembl_havana	16	42.3017	47.1957	52.5885	66.9183	59.5094	58.596	121.117	108.026	98.7741	100.731	125.182	101.749
10	4266380	4359471	+	Akap12	protein_coding	Akap12	ensembl_havana	9	21.4649	21.6726	18.7455	60.0126	64.86	33.6354	70.3614	69.5785	40.7822	62.9376	72.0861	35.1895
7	75455534	75754610	+	Akap13	protein_coding	Akap13	ensembl_havana	15	676.25	664.524	679.151	622.927	632.551	609.367	544.605	504.547	587.571	496.064	510.623	568.871
X	37150698	37168843	-	Akap14	protein_coding	Akap14	ensembl_havana	6	0.0001	0.275133	0.0562242	0.0549061	0.0001	0.112031	0.110556	0.168979	0.0001	0.0001	0.0563735	0.0001
X	36608314	36645396	-	Akap17b	protein_coding	Akap17b	ensembl_havana	12	0.0001	0.275133	0.39297	3.39808	3.47307	2.9103	5.68858	4.95387	6.41586	5.5053	6.8092	3.47273
12	76324891	76334154	+	Akap5	protein_coding	Akap5	ensembl_havana	15	0.0001	0.0001	0.168473	0.0549061	0.610216	0.0001	0.607608	1.29484	0.596914	2.15754	0.78793	0.810381
10	25169090	25307871	-	Akap7	protein_coding	Akap7	ensembl_havana	16	4.54214	4.84068	5.66865	16.8804	16.9425	14.3832	10.2173	10.3017	8.10683	14.0607	15.1377	14.9324
17	32303676	32321154	-	Akap8	protein_coding	Akap8	ensembl	5	33.3859	33.004	42.4861	92.2936	92.1745	88.6493	113.107	109.377	108.073	96.341	120.088	97.5232
17	32321425	32350582	-	Akap8l	protein_coding	Akap8l	ensembl	9	19.2671	21.5627	18.6333	32.7193	28.5817	24.0093	26.9514	25.163	20.4907	24.0295	29.6563	27.7233
5	3928054	4081311	+	Akap9	protein_coding	Akap9	ensembl_havana	17	65.1271	68.2632	101.361	115.338	117.024	120.214	141.789	153.764	160.691	132.326	154.415	136.417
7	109703690	109712190	+	Akip1	protein_coding	Akip1	ensembl_havana	5	1.39202	0.770192	2.18895	3.50769	4.83409	5.93243	13.7519	10.6957	15.5173	12.2752	10.8046	8.50805
4	123734559	123750346	-	Akirin1	protein_coding	Akirin1	ensembl_havana	9	60.5851	62.9114	79.5766	61.0987	62.1232	60.6319	48.8075	41.8656	50.9254	42.1074	48.9539	55.3028
11	85216597	85217055	+	Akirin1-ps	processed_pseudogene	Akirin1-ps	havana	1	0.0001	0.291452	0.120053	0.0629736	0.202652	0.313017	0.180012	0.24156	0.0001	0.0744945	0.0605344	0.317474
4	34550937	34566909	+	Akirin2	protein_coding	Akirin2	ensembl_havana	7	11.868	11.9915	20.7661	22.7995	17.1303	25.0726	27.8351	24.4875	33.6206	24.5503	26.111	25.8712
4	63367125	63403355	-	Akna	protein_coding	Akna	ensembl_havana	11	780.132	643.796	514.715	331.577	336.55	352.302	193.519	176.14	167.954	239.178	200.615	278.622
4	63381358	63394019	+	Aknaos	antisense	Aknaos	ensembl_havana	1	1.39202	0.0001	0.280721	0.109712	0.23476	0.0001	0.110556	0.0001	0.199038	0.0001	0.337741	0.0001
4	116636510	116651681	-	Akr1a1	protein_coding	Akr1a1	ensembl_havana	14	60.5848	61.387	63.0279	256.878	285.499	246.03	264.099	226.071	227.183	230.845	246.872	277.81
6	34384218	34396951	+	Akr1b10	protein_coding	Akr1b10	ensembl_havana	13	1.46527	2.20036	2.52569	16.99	15.3469	13.4318	18.9421	18.5205	18.203	17.1108	21.2715	22.4565
6	34302434	34317479	-	Akr1b3	protein_coding	Akr1b3	ensembl_havana	18	9.24231	9.47036	12.6061	69.4882	70.4829	59.0806	114.799	78.3158	87.3359	71.7349	86.1889	71.9319
13	4191150	4205597	+	Akr1c13	protein_coding	Akr1c13	ensembl_havana	12	0.293135	0.0001	0.0001	0.109712	0.047032	0.0001	0.221012	0.112686	0.0001	0.223284	0.0563735	0.0001
4	139310744	139318427	+	Akr7a5	protein_coding	Akr7a5	ensembl_havana	7	1.75831	0.550166	0.561342	5.3711	5.77274	4.75716	8.94704	7.76851	5.81904	6.91879	6.69665	6.5981
12	112653821	112674885	-	Akt1	protein_coding	Akt1	ensembl_havana	14	159.044	141.092	145.25	181.134	166.795	158.829	158.837	143.603	157.561	117.469	126.615	160.204
7	44848991	44855422	+	Akt1s1	protein_coding	Akt1s1	ensembl_havana	17	6.22709	5.61077	3.81655	15.017	14.1266	10.9693	20.5449	20.8284	21.6612	22.0952	13.9559	12.7622
7	27591552	27640827	+	Akt2	protein_coding	Akt2	ensembl_havana	15	110.676	107.355	105.143	79.6542	85.9676	82.9485	89.5583	75.0942	86.7149	80.6939	68.8222	81.0752
11	16514533	16515982	+	Akt2-ps	processed_pseudogene	Akt2-ps	havana	3	0.604089	1.5579	3.23291	2.44557	1.51405	1.67141	1.23729	2.47778	1.46458	1.06555	2.6452	2.0944
1	177020073	177258204	-	Akt3	protein_coding	Akt3	ensembl_havana	16	5.64102	5.72079	13.3577	59.5201	56.7878	65.7599	82.1242	81.5683	84.7976	78.5607	92.5702	83.1122
8	91111784	91199977	-	Aktip	protein_coding	Aktip	ensembl_havana	16	29.8058	24.8042	19.1814	13.1286	10.1628	12.9982	9.93596	10.2647	13.7072	14.081	11.7843	14.7775
2	136881271	136891390	-	AL731706.1	protein_coding	AL731706.1	havana	2	0.475361	1.45336	0.401597	0.145709	0.0889713	1.46086	0.027847	0.385323	2.58008	0.000105808	0.000104344	0.000101621
2	25244819	25246864	-	AL732309.1	protein_coding	AL732309.1	havana	2	4.21042	5.091	1.44396	3.17797	2.61018	1.86357	4.54121	3.388	5.35184	3.35408	3.04236	3.8415
4	43492783	43493064	-	AL732506.1	lincRNA	AL732506.1	havana	1	0.0531586	0.0160357	0.0407487	0.0932847	0.067456	0.100026	0.115117	0.382841	0.00730418	0.0001	0.0245541	0.050402
4	62509169	62519919	-	Alad	protein_coding	Alad	ensembl_havana	10	0.732687	1.37526	2.63794	3.34327	3.98932	3.69382	11.8189	11.5401	12.1353	12.2752	9.28525	7.35051
9	106233455	106248655	-	Alas1	protein_coding	Alas1	ensembl_havana	16	95.0168	96.522	144.304	106.818	118.18	167.466	232.731	208.503	348.759	125.8	129.769	152.923
X	150547375	150570639	+	Alas2	protein_coding	Alas2	ensembl_havana	13	6.19626	3.97049	2.60761	2.74417	1.87965	1.66314	2.33321	1.97243	1.0851	2.27149	2.49957	2.35349
16	52248996	52454075	-	Alcam	protein_coding	Alcam	ensembl_havana	13	22.637	24.533	44.1138	20.3332	19.9931	31.2288	12.7025	12.1031	22.9775	11.68	13.8434	17.1318
7	45140684	45154585	-	Aldh16a1	protein_coding	Aldh16a1	ensembl_havana	15	18.4613	18.6473	17.7915	46.5852	50.4412	40.4591	62.1301	49.3622	56.2768	46.1247	45.638	53.6867
19	40550257	40588464	-	Aldh18a1	protein_coding	Aldh18a1	ensembl_havana	13	5.12821	6.43587	7.35238	22.7446	22.9029	19.532	46.7231	40.9813	40.9812	36.4533	35.2273	21.241
9	71215789	71296244	+	Aldh1a2	protein_coding	Aldh1a2	ensembl_havana	5	0.0001	0.0001	0.0001	0.164518	0.23476	0.671685	0.165784	0.112686	0.497445	0.372073	0.281468	0.926136
7	66390890	66427518	-	Aldh1a3	protein_coding	Aldh1a3	ensembl_havana	15	0.0001	0.0551066	0.0562242	0.164518	0.0001	0.0001	0.331468	0.225271	0.199038	0.297678	0.506562	0.520995
4	45799022	45804605	+	Aldh1b1	protein_coding	Aldh1b1	ensembl_havana	5	0.732687	0.715185	0.729715	13.8112	18.7729	11.7528	16.5685	15.7058	12.2348	8.85305	11.4799	15.0482
10	83487450	83534141	-	Aldh1l2	protein_coding	Aldh1l2	ensembl_havana	14	0.146617	0.440153	0.224597	0.0001	0.0001	0.0560654	0.386696	0.281564	0.348242	0.223284	0.170173	0.607003
5	121566027	121593825	-	Aldh2	protein_coding	Aldh2	ensembl_havana	14	948.409	921.255	798.544	335.082	369.541	416.715	291.328	268.914	325.015	219.687	216.147	290.601
11	61223417	61267465	-	Aldh3a2	protein_coding	Aldh3a2	ensembl_havana	19	113.772	101.157	112.305	69.4938	68.9898	72.8116	56.0015	42.8391	49.5355	41.2147	51.547	75.5299
19	3913493	3929762	-	Aldh3b1	protein_coding	Aldh3b1	ensembl	8	140.338	118.321	92.5002	74.6227	85.3808	80.8286	30.9278	28.8192	37.3386	39.2767	27.8555	62.0415
19	3972328	3981646	+	Aldh3b2	protein_coding	Aldh3b2	ensembl_havana	4	5.2702	4.9093	1.986	0.15427	0.240767	0.298316	0.0001	0.0001	0.0001	0.0001	0.0001	0.0001
19	3958645	3972104	+	Aldh3b3	protein_coding	Aldh3b3	ensembl_havana	13	12.9973	14.3963	7.37946	0.198078	0.21738	1.70223	0.0001	0.0592583	0.310636	0.0782305	0.0001	0.0608986
4	139622866	139649691	+	Aldh4a1	protein_coding	Aldh4a1	ensembl_havana	15	21.0253	18.7573	21.3273	19.8399	18.4444	17.7432	36.8371	33.0644	29.0777	21.3513	25.213	22.5143
13	24907579	24937662	-	Aldh5a1	protein_coding	Aldh5a1	ensembl_havana	6	1.2455	1.37526	1.08265	15.6223	17.4367	7.11906	20.3911	20.3015	12.6657	17.6862	17.5571	8.08979
12	84430717	84451005	-	Aldh6a1	protein_coding	Aldh6a1	ensembl_havana	11	11.5891	16.9773	11.8979	12.8777	13.4258	11.8788	17.7001	19.3887	17.6306	15.5327	21.287	11.7492
18	56509687	56572952	-	Aldh7a1	protein_coding	Aldh7a1	ensembl_havana	13	1.2455	1.15524	0.224597	3.34327	1.83045	1.79099	3.31402	3.26509	3.23377	3.12467	2.19477	1.91005
1	167349991	167368533	+	Aldh9a1	protein_coding	Aldh9a1	ensembl_havana	14	8.79114	8.63613	12.7964	77.0573	75.8425	65.0318	102.945	87.7042	87.8807	96.9362	94.483	84.5006
7	126795234	126809109	-	Aldoa	protein_coding	Aldoa	ensembl_havana | havana	16 | 2	635.46	561.764	494.214	533.161	612.749	486.469	527.399	438.771	486.359	375.14	386.787	463.327
4	72850583	72852635	-	Aldoart1	protein_coding	Aldoart1	ensembl_havana	4	13.9898	8.68068	6.23242	4.09738	2.6904	7.66896	3.04383	4.14734	3.4505	15.2648	1.38848	4.91856
4	49535995	49549547	-	Aldob	protein_coding	Aldob	ensembl_havana	9	0.0001	0.0001	0.729715	0.164518	0.0001	0.0001	0.0001	0.0001	0.0001	0.0001	0.0001	0.0001
11	78322968	78327782	+	Aldoc	protein_coding	Aldoc	ensembl_havana	15	0.952463	0.715185	0.898088	5.91916	7.79081	7.94719	2.3749	2.58957	1.69107	4.46377	2.7575	3.47273
16	5233621	5244913	+	Alg1	protein_coding	Alg1	ensembl_havana	14	8.62934	5.07293	4.76583	22.7803	19.8506	15.8639	22.7245	16.9424	18.7784	12.1194	15.9315	18.6212
15	90224311	90233472	+	Alg10b	protein_coding	Alg10b	ensembl_havana	2	33.5528	40.0999	50.1751	80.0719	72.7924	73.2037	111.945	99.3567	117.074	77.891	119.639	93.009
8	22060721	22071628	+	Alg11	protein_coding	Alg11	ensembl_havana	13	4.2491	3.63054	6.34214	16.6611	15.3	11.7529	18.5568	16.7753	16.5617	14.3582	21.4403	19.5048
15	88805244	88819319	-	Alg12	protein_coding	Alg12	ensembl_havana	17	16.117	9.35122	6.84726	13.4824	13.7512	14.719	11.8741	13.5667	11.9364	21.1281	11.086	15.9164
X	144317804	144374451	+	Alg13	protein_coding	Alg13	ensembl_havana	15	2.78393	4.95069	4.37779	13.2084	11.076	12.3685	14.9669	14.8614	12.2845	11.4569	17.2761	15.627
3	121291773	121363095	+	Alg14	protein_coding	Alg14	ensembl_havana	11	1.83157	1.21024	2.58181	3.6173	3.80159	4.02961	7.78725	9.23213	8.50471	7.21637	7.93467	4.80391
4	47465067	47474334	-	Alg2	protein_coding	Alg2	ensembl_havana	6	17.5089	21.6727	21.2712	25.5398	24.9679	20.8192	32.7503	27.8087	36.4555	30.725	30.7255	22.5144
16	20605374	20611736	-	Alg3	protein_coding	Alg3	ensembl_havana	15	2.85719	2.80543	2.0767	7.45373	9.33957	7.66736	17.8387	17.0568	16.512	22.2441	11.086	11.2283
3	54735539	54751319	+	Alg5	protein_coding	Alg5	ensembl_havana	9	5.4945	5.33574	6.79113	14.8526	18.3505	17.4053	19.9927	23.3053	25.6631	21.5001	21.384	15.3955
4	99715664	99763461	+	Alg6	protein_coding	Alg6	ensembl_havana	11	4.46888	4.34562	5.94927	11.8447	11.6064	10.8574	34.4546	30.7605	25.315	24.7735	30.592	17.7105
7	97371606	97392186	+	Alg8	protein_coding	Alg8	ensembl_havana	17	2.27112	2.75043	5.61252	12.8795	12.1086	17.0695	40.2614	36.0276	39.1411	39.5036	34.3832	31.6011
9	50775019	50843543	+	Alg9	protein_coding	Alg9	ensembl_havana	13	4.46888	4.84068	8.41607	11.537	13.2145	14.0429	19.5808	16.5376	20.7369	9.67139	12.0426	15.627
12	87425840	87444018	-	Alkbh1	protein_coding	Alkbh1	ensembl_havana	10	6.81316	3.3555	4.93903	14.3045	21.2653	17.1815	33.4683	34.395	34.6651	27.8236	33.6517	27.0288
5	114123926	114128219	-	Alkbh2	protein_coding	Alkbh2	ensembl_havana	12	1.09898	0.0001	0.335912	0.789182	0.895073	0.328614	1.81719	2.01398	2.45618	1.22074	1.63002	0.883763
2	93980550	94010808	-	Alkbh3	protein_coding	Alkbh3	ensembl_havana	14	4.76192	5.99582	4.37779	6.79606	6.75825	4.70339	8.81965	8.10627	9.7978	6.47243	8.77878	7.29263
2	93980034	93983576	+	Alkbh3os1	antisense	Alkbh3os1	ensembl_havana	11	0.512911	0.275133	0.168473	0.767386	0.281692	0.501597	0.403621	0.619321	0.0001	0.892835	0.337741	0.347363
5	136136146	136141616	+	Alkbh4	protein_coding	Alkbh4	ensembl_havana	10	11.3552	8.25108	7.184	7.56334	8.44786	8.33895	11.2666	7.99369	8.65391	7.58835	7.54075	10.7074
11	60536381	60558513	+	Alkbh5	protein_coding	Alkbh5	ensembl_havana	3	58.6071	53.1914	52.9253	87.361	90.1564	79.359	107.142	88.9427	99.3696	89.3479	82.3283	85.774
7	30308717	30314305	+	Alkbh6	protein_coding	Alkbh6	ensembl_havana	13	8.93766	5.55315	4.09717	10.3584	10.8881	9.96194	13.3653	11.5401	13.1797	13.9119	9.65562	10.3022
17	56997339	56999323	+	Alkbh7	protein_coding	Alkbh7	ensembl_havana	14	0.879204	0.880205	0.841963	1.47986	1.83045	2.96627	2.15399	2.19552	2.38736	1.93436	1.74458	1.73642
9	3335140	3391155	+	Alkbh8	protein_coding	Alkbh8	ensembl_havana	14	3.29674	5.0607	7.91362	16.8256	16.3324	20.0917	32.0323	32.4811	41.3792	23.9551	35.2836	21.3568
6	85587531	85702754	+	Alms1	protein_coding	Alms1	ensembl_havana	7	10.4761	5.8858	12.6991	14.5169	15.8161	20.6096	64.4447	58.0847	65.5935	52.7746	57.6427	42.9268
6	85721925	85756527	+	Alms1-ps1	unprocessed_pseudogene	Alms1-ps1	havana	1	0.0001	0.0001	0.0001	0.0001	0.0001	0.626069	0.0001	0.122332	0.354792	0.152252	0.26288	0.712737
6	85774393	85804058	+	Alms1-ps2	transcribed_unprocessed_pseudogene	Alms1-ps2	havana	7	0.0001	0.000100077	0.265748	0.39061	0.0001	0.255382	0.503769	0.000108306	0.000100296	0.1165	0.0001	0.000125353
11	70241457	70255354	-	Alox12	protein_coding	Alox12	ensembl_havana	10	0.0001	0.330139	0.0001	0.109712	0.187828	0.0001	0.0001	0.112686	0.0001	0.0001	0.112647	0.115854
11	70344152	70352032	-	Alox15	protein_coding	Alox15	ensembl_havana	6	0.805946	0.110113	0.168473	0.219324	0.047032	0.0560654	0.221012	0.112686	0.298507	0.0001	0.168921	0.115854
6	116410077	116461179	-	Alox5	protein_coding	Alox5	ensembl_havana	12	441.816	437.581	338.038	27.8963	32.1485	57.3087	8.39476	7.43076	16.0643	5.57969	5.06472	16.8424
5	149264767	149288154	+	Alox5ap	protein_coding	Alox5ap	ensembl_havana	9	505.93	481.271	371.768	362.882	409.497	365.219	154.397	138.586	159.798	143.518	136.159	238.043
11	69183932	69197844	-	Alox8	protein_coding	Alox8	ensembl_havana	11	0.0001	0.0001	0.112348	0.219324	0.375556	0.167996	0.165784	0.39415	0.0001	0.148889	0.337741	0.289486
11	69125896	69149116	+	Aloxe3	protein_coding	Aloxe3	ensembl_havana	10	0.0001	0.0001	0.0562242	1.86351	1.83045	0.895546	0.110556	0.225271	0.596914	0.0001	0.225194	0.0579772
3	127670310	127780528	-	Alpk1	protein_coding	Alpk1	ensembl_havana	11	50.1824	64.633	72.6815	111.97	112.168	116.912	73.1219	71.9425	69.9766	65.6903	82.6096	122.12
18	65265529	65393889	-	Alpk2	protein_coding	Alpk2	ensembl_havana	15	0.0001	0.275133	0.112348	0.71258	0.187828	0.559754	1.21512	2.02664	1.49214	2.08315	2.13849	1.62066
7	81057600	81105613	+	Alpk3	protein_coding	Alpk3	ensembl_havana	12	0.0001	0.0001	0.280721	0.0001	0.093964	0.223962	0.221012	0.281564	0.298507	0.0001	0.168921	0.0001
1	59162926	59237232	-	Als2	protein_coding	Als2	ensembl_havana	14	9.52372	8.79727	12.7964	11.4472	12.6223	16.0566	12.9206	11.3071	14.8538	7.88592	12.8867	14.8167
9	110879870	110900531	+	Als2cl	protein_coding	Als2cl	ensembl_havana	15	2.71067	2.2777	0.99564	7.25607	7.2266	4.02961	2.74998	2.58957	1.78219	3.71257	2.5282	4.68543
1	58646903	58695990	-	Als2cr12	protein_coding	Als2cr12	ensembl_havana	13	0.0001	0.0001	0.0001	0.0549061	0.0001	0.279927	0.110556	0.151526	0.646649	0.608907	0.112647	0.0001
2	93642384	93681340	+	Alx4	protein_coding	Alx4	ensembl_havana	12	0.0001	0.0551066	0.0001	0.109712	0.047032	0.0001	0.0001	0.225271	0.0995691	0.0001	0.0001	0.0001
11	120592121	120598366	-	Alyref	protein_coding	Alyref	ensembl_havana	2	17.2159	15.151	27.0379	30.6829	28.7499	38.9891	84.7802	90.2476	94.0011	71.6973	69.5129	55.5203
1	171503478	171504751	+	Alyref2	protein_coding	Alyref2	ensembl_havana	1	3.29674	2.4569	2.70811	6.06427	8.0759	7.26437	8.0526	8.03926	8.42102	10.5834	8.98937	6.17737
15	10981756	10996627	+	Amacr	protein_coding	Amacr	ensembl_havana	7	0.366393	0.330139	0.224597	2.30196	1.73658	1.39924	2.59582	2.25181	2.13869	2.23194	3.54533	1.15764
2	91730134	91918850	+	Ambra1	protein_coding	Ambra1	ensembl_havana	16	28.4977	23.6529	19.4752	29.3214	30.1305	26.9754	34.4624	26.6266	28.7964	31.6921	25.6046	31.659
10	40287458	40302187	-	Amd1	protein_coding	Amd1	ensembl_havana	5	15.4284	20.2503	27.4588	69.6909	63.4201	55.8339	116.385	90.3606	96.8923	38.2645	81.8372	67.1901
10	35708675	35711893	-	Amd2	protein_coding	Amd2	ensembl_havana	3	3.49669	5.05285	2.62384	9.27276	4.99283	15.5789	11.9755	11.7323	13.876	20.6079	8.16961	7.45177
17	24155833	24163767	-	Amdhd2	protein_coding	Amdhd2	ensembl_havana	12	25.0546	25.5782	19.1946	37.8711	39.7046	34.8665	34.5729	26.4014	31.9297	26.9309	27.124	38.7778
18	64448519	64450015	-	Amd-ps3	processed_pseudogene	Amd-ps3	ensembl	4	0.855083	0.000100013	0.000213915	0.110539	0.139549	1.38092	0.0459715	0.0228237	0.0411204	0.197105	0.974694	0.772502
X	95420318	95444873	-	Amer1	protein_coding	Amer1	ensembl_havana	7	0.732687	2.03534	4.20942	14.1949	14.0797	12.5923	28.2768	24.769	22.2812	18.9707	26.2798	18.6944
14	60373259	60388198	+	Amer2	protein_coding	Amer2	ensembl_havana	8	138.606	146.758	107.702	0.109712	0.70408	0.671685	0.331468	0.450443	0.0001	0.372073	0.731656	0.173732
8	93971588	94012843	-	Amfr	protein_coding	Amfr	ensembl_havana	14	231.789	215.021	191.047	100.569	95.9756	97.6599	104.492	77.5716	97.0822	75.5849	72.6492	88.4945
10	80805243	80807649	+	Amh	protein_coding	Amh	ensembl_havana	5	0.805946	0.110113	0.168473	0.109712	0.093964	0.0001	0.497152	0.39415	0.149304	0.0001	0.394015	0.520995
15	102445367	102454634	+	Amhr2	protein_coding	Amhr2	ensembl_havana	11	0.439652	0.385146	0.112348	0.109712	0.23476	0.167996	0.331468	0.0563928	0.0001	0.520862	0.112647	0.0001
3	108186335	108192287	+	Amigo1	protein_coding	Amigo1	ensembl_havana	9	0.0001	0.660179	1.73995	3.34327	2.81602	6.04436	10.1621	9.00696	10.1459	9.52261	7.37194	8.68167
15	97244125	97247288	-	Amigo2	protein_coding	Amigo2	ensembl_havana	6	0.0001	0.110113	0.224597	0.657773	0.281692	0.112031	1.04943	0.731907	0.646649	0.744046	0.900477	0.289486
9	108053159	108055702	+	Amigo3	protein_coding	Amigo3	ensembl_havana	5	1.68505	0.605172	1.23483	4.16536	3.19147	2.68644	3.53469	4.10948	2.5863	3.71983	3.43279	4.10938
X	142851146	142966729	-	Ammecr1	protein_coding	Ammecr1	ensembl_havana	3	17.2159	22.8828	28.3428	13.8112	12.8595	20.4834	26.1782	29.1035	33.8693	29.3116	28.4745	20.1993
18	31759826	31782744	+	Ammecr1l	protein_coding	Ammecr1l	ensembl_havana	9	26.886	33.9942	34.3089	56.615	56.5999	54.5101	63.9811	55.3922	63.4117	60.1111	56.4987	64.4753
6	149157147	149188713	-	Amn1	protein_coding	Amn1	ensembl_havana	13	24.4685	33.059	30.9246	23.8956	19.8054	15.5585	13.9728	20.6033	9.30046	17.7804	21.159	14.2958
X	145446425	145505182	-	Amot	protein_coding	Amot	ensembl_havana	16	0.805946	0.275133	1.17871	6.41242	5.44421	3.69382	25.2945	21.898	13.4284	13.3167	18.3453	5.03542
9	14541966	14645057	-	Amotl1	protein_coding	Amotl1	ensembl_havana	17	0.0001	0.440153	0.224597	0.657773	1.78351	1.00748	3.09287	2.92733	2.03922	5.13332	3.99552	2.48882
9	102716672	102733419	+	Amotl2	protein_coding	Amotl2	ensembl_havana	15	22.1975	17.0521	14.7046	3.67211	4.74023	7.72333	2.92719	2.87103	5.6201	1.78557	0.450288	0.578872
3	108074062	108086652	-	Ampd2	protein_coding	Ampd2	ensembl_havana	17	56.152	56.7668	54.1038	62.5267	58.8506	68.8294	112.702	91.1225	118.784	71.5621	64.8235	67.3658
7	110768206	110812406	+	Ampd3	protein_coding	Ampd3	ensembl_havana	17	192.952	174.048	156.704	157.484	156.343	135.301	33.528	35.0426	32.4452	43.6729	36.2466	92.4443
9	108296853	108302303	+	Amt	protein_coding	Amt	ensembl_havana	12	2.19786	1.98034	1.96445	3.34327	4.50557	1.73503	4.03174	4.27836	2.28789	4.91014	3.65788	2.72033
3	113555710	113606700	-	Amy1	protein_coding	Amy1	ensembl_havana	12	0.0747146	0.963751	0.862576	0.852857	0.603971	0.0560676	0.474196	0.000150875	0.00273188	0.298979	0.372421	0.809332
5	140724127	140761440	+	Amz1	protein_coding	Amz1	ensembl_havana	16	3.42962	1.97163	1.59934	8.86826	9.46092	7.5952	5.00405	4.96512	5.11415	3.86937	5.14756	5.54307
11	109425946	109452814	+	Amz2	protein_coding	Amz2	ensembl_havana	16	34.525	24.1353	28.2571	42.8419	37.9858	41.3527	59.8314	53.6781	52.5907	62.8619	60.3483	55.4731
2	128610104	128687392	-	Anapc1	protein_coding	Anapc1	ensembl_havana	10	88.8628	75.3043	88.6206	144.196	142.812	140.865	261.724	238.459	243.253	180.407	231.678	207.546
8	79711820	79779060	+	Anapc10	protein_coding	Anapc10	ensembl_havana	8	2.80837	4.62065	4.09717	5.69994	5.81555	12.5098	7.67399	10.358	9.25073	9.82018	13.2918	8.85532
11	120598421	120608199	+	Anapc11	protein_coding	Anapc11	ensembl_havana	12	18.0217	14.2468	15.9955	31.0203	37.9211	32.2922	44.0168	38.1105	39.1909	39.0572	31.0631	35.5367
9	102626296	102634426	+	Anapc13	protein_coding	Anapc13	ensembl_havana	13	6.08058	5.11571	6.51051	4.38459	5.16276	9.49031	8.62412	11.6527	16.4736	10.2665	9.00386	12.5736
7	101863715	101901850	+	Anapc15	protein_coding	Anapc15	ensembl_havana	18	7.83878	8.46714	13.9257	11.0871	14.6186	13.2292	24.0166	25.2954	26.5808	16.5845	22.7152	21.1602
10	59987409	60003136	-	Anapc16	protein_coding	Anapc16	ensembl_havana	10	17.3624	10.2863	8.30649	34.3087	35.9031	28.4865	30.7621	30.1731	25.2155	34.668	27.5179	33.9741
2	25272478	25285916	+	Anapc2	protein_coding	Anapc2	ensembl_havana	12	54.6511	56.8217	39.3994	59.1359	61.1053	49.4734	68.483	53.8724	62.5162	50.9604	58.2433	62.5653
5	52834012	52867798	+	Anapc4	protein_coding	Anapc4	ensembl_havana	13	23.1498	29.7036	27.7816	29.1022	32.6648	29.9976	39.5433	46.6669	42.7221	46.0502	48.0577	41.556
5	122787459	122821340	-	Anapc5	protein_coding	Anapc5	ensembl_havana	13	76.9217	75.3591	103.044	148.525	156.518	141.481	304.526	257.821	278.86	224.746	247.492	216.75
5	122421693	122444913	+	Anapc7	protein_coding	Anapc7	ensembl_havana	11	15.8972	14.6318	17.8476	20.4976	21.9642	19.9797	36.7268	34.5074	33.7698	30.2787	31.9635	27.6076
14	51091150	51102010	+	Ang	protein_coding	Ang	ensembl_havana	11	0.0001	0.220126	0.112348	4.61163	4.75316	3.3545	1.5665	1.93189	2.7355	1.11602	2.08222	2.48882
12	86700502	86726461	-	Angel1	protein_coding	Angel1	ensembl_havana	14	0.0001	1.10023	1.40321	1.47987	1.73658	1.51117	3.97652	3.88431	3.38205	2.52951	2.87005	1.2734
1	190925112	190946963	+	Angel2	protein_coding	Angel2	ensembl_havana	16	44.7611	44.7755	40.1289	58.2041	52.8451	49.0818	62.3528	54.1537	55.4541	58.3996	59.65	52.2052
15	42424723	42676978	-	Angpt1	protein_coding	Angpt1	ensembl_havana	9	0.293135	0.0001	0.0001	0.109712	0.187828	0.335892	1.60171	1.01337	0.596914	0.81844	1.40694	0.173732
8	18690263	18741563	-	Angpt2	protein_coding	Angpt2	ensembl_havana	6	0.0001	0.110113	0.39297	0.274131	0.610216	0.447823	0.773292	0.675614	1.04453	0.520862	0.337741	1.50491
2	151911210	151945338	+	Angpt4	protein_coding	Angpt4	ensembl_havana	7	0.439652	0.385146	0.224597	0.328937	0.0001	0.112031	0.165784	0.0563928	0.0001	0.0001	0.168921	0.173732
2	33216069	33247718	+	Angptl2	protein_coding	Angptl2	ensembl_havana	8	2.4909	3.19048	1.79608	47.2979	54.4413	38.2804	22.6436	20.0404	15.2189	33.2544	35.2837	49.3115
4	99030954	99046112	+	Angptl3	protein_coding	Angptl3	ensembl_havana	12	0.0001	0.0001	0.0001	0.0001	0.093964	0.279927	0.165784	0.168979	0.945056	0.0744945	0.168921	0.289486
17	33773750	33781831	-	Angptl4	protein_coding	Angptl4	ensembl_havana	16	0.0001	0.330139	0.449094	1.15103	1.92431	0.559754	8.2843	8.61292	6.66453	6.17485	3.60161	1.62066
9	20873808	20879728	-	Angptl6	protein_coding	Angptl6	ensembl_havana	7	0.0001	0.121872	0.0717455	0.188402	0.534915	0.22333	1.11727	1.1488	0.793574	1.25142	1.36192	1.07127
4	148495183	148500461	-	Angptl7	protein_coding	Angptl7	ensembl_havana	3	0.0001	0.0001	0.0562242	0.383743	0.047032	0.167996	0.221012	0.731907	0.149304	0.148889	0.0563735	0.347363
9	21835510	21837348	+	Angptl8	protein_coding	Angptl8	ensembl_havana	8	1.02572	0.990218	0.729715	0.548161	1.07954	2.01485	1.32557	1.85776	1.98948	0.892835	0.337741	2.19943
15	27466677	27594910	+	Ank	protein_coding	Ank	ensembl_havana	7	1.17224	1.81532	0.561342	49.2706	47.9177	43.4292	40.9792	36.9281	40.3347	38.3133	33.9894	57.4719
8	22974844	23150498	+	Ank1	protein_coding	Ank1	ensembl_havana	18	0.952463	0.770192	0.280721	0.274131	0.751012	0.335892	0.331468	0.39415	0.447711	0.520862	0.225194	0.173732
3	126921612	127499351	-	Ank2	protein_coding	Ank2	ensembl_havana	17	1.02572	0.935211	0.505218	13.044	14.4082	10.6335	9.44409	9.34472	8.75338	8.62987	8.15976	11.9807
9	65488470	65520194	-	Ankdd1a	protein_coding	Ankdd1a	ensembl_havana	5	0.0001	0.0001	0.224597	0.548161	0.187828	0.279927	0.0001	0.0001	0.0001	0.0744945	0.0563735	0.0579772
13	96416134	96471199	-	Ankdd1b	protein_coding	Ankdd1b	ensembl_havana	12	0.0001	0.544788	0.0001	0.0001	0.0510364	0.0001	0.110556	0.0001	0.0001	0.0001	0.0001	0.0001
11	72690006	72772147	+	Ankfy1	protein_coding	Ankfy1	ensembl_havana	14	140.731	138.452	154.454	184.369	183.457	196.718	192.297	161.955	182.328	162.327	180.971	216.754
18	36559987	36665918	+	Ankhd1	protein_coding	Ankhd1	ensembl_havana	18	117.966	132.656	156.586	178.434	177.687	188.185	191.27	193.748	219.33	220.37	213.732	236.945
5	3690000	3802926	-	Ankib1	protein_coding	Ankib1	ensembl_havana	11	24.6883	28.8786	37.7718	50.7505	46.6975	51.8801	53.1848	47.0046	53.017	38.1645	50.9276	52.8421
8	71406010	71409905	+	Ankle1	protein_coding	Ankle1	ensembl_havana	13	4.83517	4.78567	5.27578	5.20668	4.36477	5.14892	21.042	16.8317	11.439	8.77866	8.94759	8.68169
5	110231004	110256652	+	Ankle2	protein_coding	Ankle2	ensembl_havana	14	40.4389	48.7357	52.1956	173.079	160.319	146.07	148.122	141.465	156.068	117.097	173.66	170.448
1	92859803	92902907	-	Ankmy1	protein_coding	Ankmy1	ensembl_havana	14	0.0001	0.0001	0.112348	0.109712	0.0001	0.0001	0.256736	0.0001	0.467563	0.0001	0.195019	0.0001
12	36157114	36197292	+	Ankmy2	protein_coding	Ankmy2	ensembl_havana	4	1.97808	1.59529	3.64818	14.2497	15.6284	13.04	18.2253	16.2124	17.4569	14.7302	18.6266	13.717
13	98263074	98274755	+	Ankra2	protein_coding	Ankra2	ensembl_havana	16	15.3112	13.9168	13.4138	20.1687	19.8523	18.5246	20.8211	17.9012	17.0093	19.1195	19.9209	17.1318
8	11611583	11635758	-	Ankrd10	protein_coding	Ankrd10	ensembl_havana	14	8.13181	5.94081	9.76572	50.4764	45.4302	46.1716	89.4693	69.3531	69.1809	68.5919	66.5716	62.8547
8	122883822	123042278	-	Ankrd11	protein_coding	Ankrd11	ensembl_havana	17	405.393	357.349	335.961	320.805	314.931	317.926	353.37	359.274	330.842	392.686	355.038	343.45
17	65965698	66077090	-	Ankrd12	protein_coding	Ankrd12	ensembl_havana	15	141.133	174.908	208.474	69.5927	65.9958	87.3827	66.5843	76.5007	111.769	78.7322	87.4137	85.5443
5	114774677	114806201	+	Ankrd13a	protein_coding	Ankrd13a	ensembl_havana	16	310.031	286.749	296.9	240.055	269.153	287.714	411.502	401.651	420.605	354.42	354.187	345.989
11	77470485	77489679	-	Ankrd13b	protein_coding	Ankrd13b	ensembl_havana	16	0.0001	0.715185	0.112348	14.0853	12.8125	7.66736	18.391	16.3813	16.0644	22.6905	14.8563	13.4276
3	157947239	158008035	+	Ankrd13c	protein_coding	Ankrd13c	ensembl_havana	14	34.212	44.6105	52.813	51.6823	46.3221	61.1142	52.6324	51.3392	63.9587	55.2009	61.507	68.7582
19	4270180	4283138	-	Ankrd13d	protein_coding	Ankrd13d	ensembl_havana	15	18.388	20.2425	17.9599	13.044	12.484	10.4656	6.95883	6.98042	5.07302	8.10911	7.42821	10.5916
2	11777876	11790330	+	Ankrd16	protein_coding	Ankrd16	ensembl_havana	11	30.9152	44.5554	39.1748	69.3848	59.7915	37.2731	56.4985	50.7762	34.4164	40.8427	58.6934	46.1282
5	90227166	90366578	-	Ankrd17	protein_coding	Ankrd17	ensembl_havana	15	110.84	101.158	135.765	150.114	155.158	191.848	207.599	217.231	246.534	213.138	215.135	219.182
19	34122549	34166054	-	Ankrd22	protein_coding	Ankrd22	ensembl_havana	15	60.2919	68.4781	80.8153	0.219324	0.093964	4.64523	0.27624	0.168979	0.149304	0.0001	0.0001	0.0579772
1	36530188	36536884	-	Ankrd23	protein_coding	Ankrd23	ensembl_havana	12	3.76644	2.46699	2.80897	8.30865	8.27184	7.64145	7.73731	8.73228	4.63311	8.22983	6.19116	6.94462
10	81628540	81647611	+	Ankrd24	protein_coding	Ankrd24	ensembl_havana	17	1.53853	0.660179	1.06646	2.52118	3.05068	2.29468	5.13631	5.40421	5.27196	4.53817	4.38944	3.87787
6	118501308	118562227	-	Ankrd26	protein_coding	Ankrd26	ensembl_havana	10	1.61179	3.19048	6.73501	7.34412	7.9316	9.01053	24.4109	25.2756	27.2546	17.1108	29.5437	14.4694
7	35586244	35639227	+	Ankrd27	protein_coding	Ankrd27	ensembl_havana	16	36.0434	35.8643	38.7258	27.8416	29.6142	31.6766	29.3262	28.0902	38.8923	20.533	25.6608	27.2024
14	31698768	31830652	-	Ankrd28	protein_coding	Ankrd28	ensembl_havana	8	253.768	285.042	338.771	195.383	189.279	252.741	381.018	346.481	502.334	236.65	303.826	242.274
15	31291478	31367727	-	Ankrd33b	protein_coding	Ankrd33b	ensembl_havana	17	48.2042	40.98	47.4811	0.0549061	0.657148	0.503789	0.110556	0.0563928	0.0001	0.0744945	0.225194	0.463118
13	92425896	92441659	+	Ankrd34b	protein_coding	Ankrd34b	ensembl_havana	12	0.0001	0.0001	0.112348	0.109712	0.047032	0.335892	0.055328	0.112686	0.0001	0.297678	0.0563735	0.173732
3	96670131	96691033	+	Ankrd35	protein_coding	Ankrd35	ensembl_havana	13	0.0001	0.0001	0.0001	0.0001	0.328624	0.167996	0.055328	0.281564	0.0498345	0.0001	0.168921	0.347363
8	45996902	46005708	-	Ankrd37	protein_coding	Ankrd37	ensembl_havana	16	0.293135	1.15846	0.39297	2.16914	1.68347	1.3849	2.48461	1.5763	1.01026	1.06111	1.18184	1.56279
1	36537507	36547446	-	Ankrd39	protein_coding	Ankrd39	ensembl_havana	9	3.81107	5.37753	4.28652	10.4295	9.48494	8.77692	10.9692	9.23008	6.47374	6.35161	9.03397	9.81175
11	94328001	94341842	+	Ankrd40	protein_coding	Ankrd40	ensembl_havana	13	23.5161	26.9533	31.8787	40.447	51.7659	45.8917	51.9696	49.1437	52.9675	42.4793	47.72	56.0831
7	92581723	92637143	-	Ankrd42	protein_coding	Ankrd42	ensembl_havana	19	0.0001	0.0001	0.0001	0.176922	0.0001	0.175814	0.191459	0.124222	0.161488	0.0001	0.0001	0.0617214
1	54645340	54926388	-	Ankrd44	protein_coding	Ankrd44	ensembl_havana	14	324.586	354.842	351.144	305.038	287.692	293.024	225.327	214.678	220.932	194.151	238.53	262.841
15	36477668	36496821	-	Ankrd46	protein_coding	Ankrd46	ensembl_havana	8	32.7466	43.5103	41.8125	24.4984	25.0618	23.3936	29.8784	25.3318	31.5318	20.0866	22.6221	23.151
9	14779618	14784857	-	Ankrd49	protein_coding	Ankrd49	ensembl_havana	4	8.20507	7.86604	8.36261	23.5119	26.6574	20.1477	41.0898	40.362	40.8818	40.1731	42.5991	32.2377
3	38449259	38484845	-	Ankrd50	protein_coding	Ankrd50	ensembl_havana	16	9.89002	15.622	6.06152	20.662	23.7477	17.965	15.6296	12.3282	9.69833	15.8461	18.4015	15.4533
10	128377115	128408705	+	Ankrd52	protein_coding	Ankrd52	ensembl_havana	9	92.3775	77.0842	63.882	177.525	189.119	165.099	211.758	193.357	181.821	220.995	173.906	189.61
6	83762644	83768327	+	Ankrd53	protein_coding	Ankrd53	ensembl_havana	6	0.0733587	0.110113	0.000536745	0.569876	0.23476	0.335892	0.386696	0.112686	0.0498345	0.0001	0.450288	0.0001
15	79053094	79062894	-	Ankrd54	protein_coding	Ankrd54	ensembl_havana	12	11.7948	10.7814	10.7198	12.0574	10.9822	14.4951	25.5154	21.0536	24.3203	22.3929	16.432	18.0578
13	112288451	112384003	+	Ankrd55	protein_coding	Ankrd55	ensembl_havana	15	0.0001	0.0001	0.0001	0.109712	0.047032	0.0001	0.11835	0.168979	0.199038	0.0001	0.225194	0.173732
4	32804035	32950842	-	Ankrd6	protein_coding	Ankrd6	ensembl_havana	13	0.512911	0.0551066	0.168473	0.0549061	0.093964	0.0001	0.221012	0.168979	0.0995691	0.0001	0.225194	0.0001
5	143890741	143897686	-	Ankrd61	protein_coding	Ankrd61	ensembl_havana	14	2.44193	2.36538	1.79608	3.52564	3.69592	1.63522	1.50217	2.32112	2.19222	0.761709	2.67959	4.20412
2	118699103	118703964	-	Ankrd63	protein_coding	Ankrd63	ensembl_havana	1	2.63741	2.75043	4.82678	0.164518	0.516352	2.96627	0.27624	0.225271	0.895322	0.0001	0.0001	0.173732
17	43534188	43543640	-	Ankrd66	protein_coding	Ankrd66	ensembl_havana	2	3.51652	7.59101	3.64818	1.7539	1.22033	1.11941	0.331468	0.0001	0.348242	0.148889	0.0001	0.173732
6	18866318	18879587	+	Ankrd7	protein_coding	Ankrd7	ensembl_havana	13	0.0001	0.0001	0.0001	0.0549061	0.047032	0.0001	0.0001	0.225271	0.0001	0.0001	0.337741	0.347363
12	110975353	110979041	-	Ankrd9	protein_coding	Ankrd9	ensembl_havana	14	12.161	10.3963	8.58711	3.34327	3.66079	4.70119	2.98241	2.42069	2.7355	2.23194	3.20769	2.19943
17	27909306	28062776	+	Anks1	protein_coding	Anks1	ensembl_havana	16	66.5189	63.4222	72.2859	89.6007	80.5807	107.888	141.817	120.8	125.373	112.336	102.755	113.838
10	89873509	90973301	+	Anks1b	protein_coding	Anks1b	ensembl_havana	14	0.0001	0.220126	0.336845	0.219324	0.187828	0.391858	0.165784	0.225271	0.0001	0.0001	0.112647	0.173732
16	4941436	4964206	-	Anks3	protein_coding	Anks3	ensembl_havana	6	27.9849	28.6035	20.4854	22.9639	24.8271	20.7633	23.3063	22.9113	18.3024	17.4828	19.0206	19.389
4	47015669	47057428	-	Anks6	protein_coding	Anks6	ensembl_havana	12	0.952463	0.220126	0.168473	0.219324	0.047032	0.0001	0.055328	0.0563928	0.0498345	0.0001	0.112647	0.231609
1	75192151	75199388	+	Ankzf1	protein_coding	Ankzf1	ensembl_havana	17	24.511	26.136	23.2155	38.0861	37.0836	31.8475	42.0955	35.4682	32.3269	38.0191	41.112	32.8134
9	22332012	22389189	-	Anln	protein_coding	Anln	ensembl_havana	8	36.2632	52.1464	91.5388	39.8441	38.3436	53.7828	92.7834	90.5189	116.975	63.0866	83.1162	84.8481
9	122175874	122294424	-	Ano10	protein_coding	Ano10	ensembl_havana	8	184.833	187.188	149.908	28.8281	30.1306	39.2879	22.7541	21.7855	23.8727	18.6731	22.3407	21.3568
10	88948994	89344763	-	Ano4	protein_coding	Ano4	ensembl_havana	16	0.0001	0.0001	0.0001	0.109712	0.0001	0.0001	0.165784	0.112686	0.0498345	0.0744945	0.0563735	0.0001
15	95790843	95974752	+	Ano6	protein_coding	Ano6	ensembl_havana	7	78.6838	72.812	84.3579	186.479	178.421	176.403	133.559	130.049	140.138	105.773	107.559	174.115
1	93373930	93404304	+	Ano7	protein_coding	Ano7	ensembl_havana	10	0.439652	0.0001	0.0001	0.548161	0.23476	0.167996	0.607608	0.281564	0.596914	0.446467	0.168921	0.115854
8	71476019	71485964	-	Ano8	protein_coding	Ano8	ensembl_havana	9	0.814524	0.68251	0.62569	10.4372	9.51937	7.48804	8.46442	10.3074	8.93911	11.1372	8.29062	9.97781
9	62341293	62378813	+	Anp32a	protein_coding	Anp32a	ensembl_havana	14	102.822	161.69	149.149	38.7975	45.1235	52.1909	85.527	109.701	80.5324	76.5522	73.5362	26.8832
4	46450902	46472658	+	Anp32b	protein_coding	Anp32b	ensembl_havana	10	78.0131	91.9132	131.929	145.648	154.323	190.637	327.363	369.889	390.524	337.512	359.266	270.645
4	143389659	143390417	+	Anp32b-ps1	processed_pseudogene	Anp32b-ps1	havana	4	0.0808989	0.387908	2.03983	1.8355	2.43	0.596706	4.11466	3.83697	2.72576	1.50415	3.24851	2.82457
3	95929246	95947391	+	Anp32e	protein_coding	Anp32e	ensembl_havana	12	27.6186	40.375	66.4511	68.0692	78.7517	99.8989	261.893	251.236	268.066	242.674	253.117	165.298
11	33394879	33395267	-	Anp32-ps	processed_pseudogene	Anp32-ps	havana	3	0.765554	1.68009	1.88141	0.882342	0.729263	0.192952	0.573901	0.238588	0.684286	0.0001	0.63234	0.145712
7	79821803	79861060	-	Anpep	protein_coding	Anpep	ensembl_havana	15	0.952463	0.110113	0.39297	0.712579	0.516352	0.279927	0.055328	0.112686	0.248773	0.0001	0.619109	0.0001
6	87133853	87335822	-	Antxr1	protein_coding	Antxr1	ensembl_havana	12	0.146617	0.110113	0.0001	0.109712	0.657148	0.671685	3.64515	3.32138	2.53656	1.48799	2.13849	1.2734
5	97882783	98031044	-	Antxr2	protein_coding	Antxr2	ensembl_havana	13	168.714	191.038	193.795	30.1434	36.3254	46.8432	18.2253	17.3383	20.8886	19.6403	19.5833	29.8647
19	20373428	20390945	-	Anxa1	protein_coding	Anxa1	ensembl_havana	14	1819	2078.66	1914.03	234.785	242.314	345.746	74.0056	64.1174	114.987	61.45	81.5401	137.517
14	25842156	25886805	+	Anxa11	protein_coding	Anxa11	ensembl_havana	15	779.047	655.174	484.47	90.606	104.886	127.269	64.8443	65.3907	72.267	83.1411	63.2734	92.3909
14	25856777	25870267	-	Anxa11os	antisense	Anxa11os	havana	1	3.94337	7.08627	2.81183	1.10527	0.620409	0.344229	0.22248	0.515698	0.101878	0.608426	1.03382	1.18532
9	69453620	69491796	+	Anxa2	protein_coding	Anxa2	ensembl_havana	14	620.064	680.308	644.875	464.63	540.336	458.847	233.002	234.639	205.999	283.221	366.383	416.301
5	96793339	96845967	+	Anxa3	protein_coding	Anxa3	ensembl_havana	12	195.601	230.148	210.354	104.625	107.803	114.449	121.06	113.205	149.653	74.6922	93.5444	102.154
6	86736840	86793585	-	Anxa4	protein_coding	Anxa4	ensembl_havana	17	9.2307	9.07618	12.4036	56.341	55.5678	61.9537	15.2983	18.239	18.7003	20.3098	19.7521	45.3759
3	36448923	36475895	-	Anxa5	protein_coding	Anxa5	ensembl_havana	13	77.7279	97.6914	90.5279	229.797	261.458	247.029	134.869	132.232	144.827	153.252	161.9	252.349
11	54979108	55033446	-	Anxa6	protein_coding	Anxa6	ensembl_havana	13	186.226	179.155	111.069	235.332	251.182	188.105	173.416	156.044	149.747	176.911	188.571	239.205
14	20455260	20480134	-	Anxa7	protein_coding	Anxa7	ensembl_havana	17	93.3319	90.7603	90.1923	85.2787	80.9579	72.0277	54.7312	51.7333	44.0648	64.5002	58.5247	77.266
3	95296096	95307177	-	Anxa9	protein_coding	Anxa9	ensembl_havana	13	3.25925	2.97891	1.76179	7.28855	4.85208	5.59521	11.1622	10.8754	13.7631	10.0035	7.22858	6.66394
13	20794113	21036618	+	Aoah	protein_coding	Aoah	ensembl_havana	8	86.9582	79.1545	85.0283	79.4143	79.4561	97.7718	28.4425	29.779	39.3401	22.1697	24.254	58.4561
11	101325063	101329703	+	Aoc2	protein_coding	Aoc2	ensembl_havana	8	7.32596	6.10297	3.4798	5.04122	3.9893	2.68644	7.55241	6.52402	4.07448	7.12881	6.35604	3.18335
11	101330605	101341939	+	Aoc3	protein_coding	Aoc3	ensembl_havana	14	0.0001	0.277928	0.0001	0.0559448	0.140896	0.0001	0.234929	0.114306	0.103426	0.223284	0.127578	0.0001
1	58029931	58106414	+	Aox1	protein_coding	Aox1	ensembl_havana	4	1.2455	1.92533	1.8522	3.89133	4.64637	1.95889	0.607608	0.563028	0.0001	0.520862	0.562835	0.520995
1	58278326	58380260	+	Aox2	protein_coding	Aox2	ensembl_havana	2	0.0001	0.0001	0.0001	0.164518	0.281692	0.112031	0.441924	0.506736	0.248773	0.744045	0.844203	0.810381
1	58113130	58200699	+	Aox3	protein_coding	Aox3	ensembl_havana	12	0.512911	0.0551066	0.39297	11.5642	13.0472	5.42874	2.20922	1.18225	0.945056	1.11602	1.29439	2.08368
3	127807007	127837524	-	Ap1ar	protein_coding	Ap1ar	ensembl_havana	6	12.9669	13.0367	22.1692	35.953	32.8525	43.6446	69.5278	68.2252	63.8594	75.2867	61.8448	55.0414
11	4986824	5042792	+	Ap1b1	protein_coding	Ap1b1	ensembl_havana	17	55.9698	50.606	53.7673	85.0039	87.6218	73.3149	91.0155	78.1343	80.2716	72.0137	83.4537	83.5746
8	109778554	109864205	+	Ap1g1	protein_coding	Ap1g1	ensembl_havana	16	174.981	181.854	197.669	164.403	164.495	166.7	186.008	169.04	202.442	151.988	193.188	186.594
14	55098575	55106594	-	Ap1g2	protein_coding	Ap1g2	ensembl_havana	16	23.1855	19.6099	21.6372	61.2709	56.463	48.9704	65.7509	56.8518	52.853	62.7483	57.009	58.9248
8	72240018	72257386	+	Ap1m1	protein_coding	Ap1m1	ensembl_havana	15	98.7527	79.7595	80.4262	78.4826	91.7515	82.5488	99.1341	93.7272	81.7638	95.7458	85.0859	96.1338
9	21294275	21312338	-	Ap1m2	protein_coding	Ap1m2	ensembl_havana	14	1.83157	2.91545	1.96445	1.42506	2.4875	1.6231	1.49126	1.5763	0.646649	1.48799	1.74458	2.48882
5	137034993	137046136	-	Ap1s1	protein_coding	Ap1s1	ensembl_havana	14	10.1098	11.4965	16.7251	25.7041	26.5635	31.0609	47.9933	43.4019	44.1643	42.8513	35.3962	37.5045
X	163909017	163933667	+	Ap1s2	protein_coding	Ap1s2	ensembl_havana	15	86.4454	128.935	141.096	222.951	201.152	198.064	120.397	116.695	118.269	120.371	154.752	180.288
1	79606876	79671973	-	Ap1s3	protein_coding	Ap1s3	ensembl_havana	14	6.95967	9.13119	12.0107	5.31629	4.64637	7.99828	3.92129	4.50353	3.97886	4.16619	9.94987	5.61419
7	44900373	44929497	-	Ap2a1	protein_coding	Ap2a1	ensembl_havana	14	61.9244	50.1577	42.9735	62.5749	72.096	56.8008	87.1693	75.2717	72.9663	83.5215	68.7435	71.6148
7	141562173	141633012	+	Ap2a2	protein_coding	Ap2a2	ensembl_havana	11	98.4599	85.3912	98.5744	171.846	181.484	162.629	88.5321	78.863	79.5095	73.5562	79.4708	142.568
11	83299024	83405036	+	Ap2b1	protein_coding	Ap2b1	ensembl_havana	14	123.441	120.299	134.025	190.888	195.894	198.787	201.525	179.913	242.01	169.916	178.555	244.242
16	20535478	20544910	+	Ap2m1	protein_coding	Ap2m1	ensembl_havana	15	182.86	160.579	145.358	146.491	169.964	160.201	159.929	157.906	175.958	146.224	161.253	191.617
7	16738410	16749295	+	Ap2s1	protein_coding	Ap2s1	ensembl_havana	11	47.7648	46.7003	49.4452	41.9814	45.8998	53.615	51.528	44.2465	59.7313	42.4049	41.9802	49.0218
13	94358960	94566318	+	Ap3b1	protein_coding	Ap3b1	ensembl_havana	6	82.5628	92.9072	87.9471	118.163	120.57	113.664	132.49	128.744	125.928	133.167	138.995	132.886
10	80706956	80742265	-	Ap3d1	protein_coding	Ap3d1	ensembl_havana	8	114.064	112.929	96.8709	167.597	153.656	155.192	133.044	117.539	127.171	118.362	122.676	154.88
14	21031442	21052509	-	Ap3m1	protein_coding	Ap3m1	ensembl_havana	13	99.0822	109.623	101.262	119.821	112.163	108.67	98.3441	101.081	92.9475	102.212	109.914	113.124
10	82585426	82586684	+	Ap3m1-ps	processed_pseudogene	Ap3m1-ps	havana	2	2.27321	0.0001	0.000100007	0.347513	1.25169	0.000100623	1.00965	0.146809	0.996173	0.468224	0.878745	0.318079
8	22787354	22805623	-	Ap3m2	protein_coding	Ap3m2	ensembl_havana	6	11.868	10.0663	9.70958	19.4563	23.5599	16.6218	13.531	14.4674	14.0252	11.5312	15.0814	13.1382
18	46741876	46790827	+	Ap3s1	protein_coding	Ap3s1	ensembl_havana	9	66.486	108.11	163.474	96.602	100.338	153.263	220.317	240.677	321.481	151.113	219.671	152.193
X	38685592	38686171	-	Ap3s1-ps1	processed_pseudogene	Ap3s1-ps1	havana	3	6.0398	1.45265	2.6524	3.64126	5.82071	3.56304	11.0149	8.84702	12.1608	6.78928	4.75964	7.80993
8	94405211	94405790	+	Ap3s1-ps2	processed_pseudogene	Ap3s1-ps2	havana	2	0.0003533	0.296313	0.000485723	0.0023269	0.00171175	0.661124	0.570936	0.307086	1.7606	0.000238329	0.227412	0.000108751
7	79875325	79920650	-	Ap3s2	protein_coding	Ap3s2	ensembl_havana	7	11.4285	10.8364	11.8423	28.1704	33.5095	23.9533	53.516	41.6005	38.6438	38.4621	41.6988	33.7425
3	103809520	103822026	+	Ap4b1	protein_coding	Ap4b1	ensembl_havana	11	24.4685	25.6955	22.546	31.3572	34.589	23.7294	32.8607	25.3881	24.7166	21.1282	27.4315	23.151
2	127008717	127067910	+	Ap4e1	protein_coding	Ap4e1	ensembl_havana	15	12.6006	13.5249	16.5567	24.334	24.0762	23.7294	31.701	26.171	30.3543	15.6482	32.7513	33.7109
5	138172002	138180430	+	Ap4m1	protein_coding	Ap4m1	ensembl_havana	11	9.36716	11.6556	11.31	51.2035	49.5934	41.0466	58.1726	54.3809	54.2935	56.976	51.673	49.1621
12	51691033	51744787	+	Ap4s1	protein_coding	Ap4s1	ensembl_havana	9	5.12821	7.81103	6.22989	10.5777	10.419	12.9281	9.99637	10.8083	14.075	9.74578	9.22896	10.9968
19	5568074	5571262	+	Ap5b1	protein_coding	Ap5b1	ensembl	5	108.057	80.8598	73.579	46.4757	52.8455	59.2115	33.8549	28.9346	38.3952	35.1143	19.6396	47.6331
14	49066097	49094235	+	Ap5m1	protein_coding	Ap5m1	ensembl_havana	6	25.4941	33.4441	35.5946	51.3019	46.9416	48.4861	49.9328	47.3776	49.6698	44.0429	60.3282	49.4089
2	131207078	131213515	+	Ap5s1	protein_coding	Ap5s1	ensembl_havana	11	4.10259	3.68554	3.42368	9.42674	10.6067	9.45825	7.84249	5.85456	6.21692	8.33229	4.72708	10.2444
5	142463944	142478711	+	Ap5z1	protein_coding	Ap5z1	ensembl_havana	13	26.5931	20.4075	16.0516	49.4352	48.7624	38.952	51.5278	42.1071	40.6829	38.0157	38.8851	40.3983
10	90989311	91082771	-	Apaf1	protein_coding	Apaf1	ensembl_havana	12	115.163	123.931	146.763	187.27	169.284	167.339	166.182	136.622	166.215	114.42	151.318	186.825
19	23758876	23949598	+	Apba1	protein_coding	Apba1	ensembl	8	3.88281	4.12559	2.24507	103.584	114.655	81.2619	114.377	115.063	89.6715	126.917	111.759	140.121
10	81266960	81273247	+	Apba3	protein_coding	Apba3	ensembl_havana	11	23.3696	17.4372	11.5056	20.662	18.7729	20.3155	21.8704	20.0404	21.3859	20.9793	13.7308	17.016
7	105558483	105581654	-	Apbb1	protein_coding	Apbb1	ensembl_havana	16	0.512911	0.330139	0.673591	10.9613	10.6537	7.38753	5.63336	3.88431	2.13869	4.76135	4.83962	8.21867
2	22774094	22875654	+	Apbb1ip	protein_coding	Apbb1ip	ensembl_havana	14	269.149	252.648	291.51	172.641	192.887	226.548	108.357	126.153	125.581	143.359	135.395	156.5
5	66298703	66618785	-	Apbb2	protein_coding	Apbb2	ensembl_havana	16	0.219876	0.275133	0.0001	0.0001	0.23476	0.112031	0.165784	0.225271	0.0001	0.0001	0.0001	0.0001
18	34220924	34322190	+	Apc	protein_coding	Apc	ensembl_havana	14	78.7529	87.9558	95.1308	121.998	133.285	122.9	113.218	122.1	119.412	117.468	134.269	147.762
10	80295977	80318264	+	Apc2	protein_coding	Apc2	ensembl_havana	13	0.146617	0.220126	0.112348	0.109712	0.375556	0.112031	0.110556	0.281564	0.0498345	0.0001	0.450288	0.752504
18	62922327	62953196	+	Apcdd1	protein_coding	Apcdd1	ensembl	12	0.0001	0.0001	0.0001	0.712579	0.46942	0.559754	0.221012	0.0563928	0.0498345	0.0001	0.0001	0.115854
5	76196625	76197095	+	Apc-ps1	transcribed_processed_pseudogene	Apc-ps1	havana	1	1.61179	1.10023	0.841964	1.04142	1.0326	1.4552	1.3808	1.23854	1.24346	0.669651	0.78793	1.04189
9	108085413	108094607	-	Apeh	protein_coding	Apeh	ensembl_havana	14	33.3328	22.9378	23.0111	50.4765	53.2681	41.4145	54.6759	47.9054	50.1325	41.3634	44.9063	42.8293
14	50924968	50927140	+	Apex1	protein_coding	Apex1	ensembl_havana	14	0.2185	1.04322	2.03725	11.156	14.3426	16.3864	49.411	49.7563	63.4381	24.3185	30.5013	22.5637
X	150519519	150589869	-	Apex2	protein_coding	Apex2	ensembl_havana	16	6.40444	4.72075	5.86735	5.9702	7.03763	7.06767	11.3635	9.34264	12.1445	6.35848	9.20553	10.5533
3	95893969	95898289	+	Aph1a	protein_coding	Aph1a	ensembl_havana	15	33.1596	31.9393	26.298	79.9643	83.2191	62.7803	92.6281	59.7235	65.3054	56.0829	62.2521	73.2709
9	66775202	66795491	-	Aph1b	protein_coding	Aph1b	ensembl_havana	15	37.8742	44.901	49.2403	18.1873	14.8701	17.1557	6.09008	5.85558	3.33933	4.67293	5.64174	9.08122
9	66814994	66834727	-	Aph1c	protein_coding	Aph1c	ensembl_havana	13	10.9162	11.8112	9.40935	21.7666	24.1775	17.2073	6.99916	7.14827	5.46388	9.16465	9.1584	6.71946
2	94411682	94438137	-	Api5	protein_coding	Api5	ensembl_havana	12	34.0305	39.7461	51.1518	81.4355	81.7467	83.2908	104.365	88.6671	100.401	63.1813	95.587	84.1824
2	103073675	103092645	+	Apip	protein_coding	Apip	ensembl_havana	12	1.97808	2.80543	4.49004	7.39893	6.99297	8.7307	11.4323	14.9177	13.13	11.1593	14.6312	10.0129
6	87628424	87672194	-	Aplf	protein_coding	Aplf	ensembl_havana	10	0.659428	1.6503	4.09717	4.4942	4.22398	5.48471	11.4822	10.5832	16.0146	9.00184	10.8046	9.08682
X	48025146	48034854	-	Apln	protein_coding	Apln	ensembl_havana	7	1.17224	0.605172	1.29096	0.0549061	0.093964	0.447823	0.055328	0.0001	0.0001	0.0001	0.0001	0.0001
2	85136225	85139924	+	Aplnr	protein_coding	Aplnr	ensembl_havana	9	1.31876	0.0551066	0.617467	0.712579	0.70408	2.18275	0.110556	0.225271	1.19373	0.0001	0.281468	1.04189
7	30434982	30445536	-	Aplp1	protein_coding	Aplp1	ensembl_havana	8	1.09898	0.0551066	0.0001	0.328937	0.0001	0.0001	0.0001	0.168979	0.0001	0.0001	0.225194	0.0001
9	31149557	31211816	-	Aplp2	protein_coding	Aplp2	ensembl_havana	17	52.4532	60.1773	73.5791	124.081	131.175	131.127	93.9975	84.6648	98.2757	80.4208	90.8822	110.256
2	150583080	150608568	-	Apmap	protein_coding	Apmap	ensembl_havana	7	68.2772	68.5382	58.257	25.7042	29.0979	33.4114	38.6045	37.7726	54.2605	30.2043	35.1148	34.3213
1	171225054	171226380	+	Apoa2	protein_coding	Apoa2	ensembl_havana	12	0.0001	0.110113	0.0001	0.0549061	0.187828	0.0560654	0.386696	0.563028	0.149304	0.148889	0.112647	0.0001
6	122577792	122602445	-	Apobec1	protein_coding	Apobec1	ensembl_havana	14	46.5194	51.4311	51.073	127.807	117.894	126.649	48.3798	46.0479	44.0151	45.604	59.1434	69.6845
17	48419231	48432931	-	Apobec2	protein_coding	Apobec2	ensembl_havana	4	0.0001	0.16512	0.0001	0.0549061	0.047032	0.0560654	0.110556	0.0001	0.0995691	0.0001	0.225194	0.0001
15	79891659	79915907	+	Apobec3	protein_coding	Apobec3	ensembl_havana	18	26.1885	31.1972	35.1772	79.0512	79.8945	84.96	182.477	184.48	161.232	201.416	177.555	150.565
7	126584942	126589113	+	Apobr	protein_coding	Apobr	ensembl_havana	12	406.688	410.207	365.1	188.277	202.219	229.367	50.5355	62.1905	54.9819	81.3445	74.576	133.813
7	19689481	19692661	-	Apoc1	protein_coding	Apoc1	ensembl_havana	14	0.0001	0.16512	0.224597	2.63079	1.92431	3.97364	0.55238	0.7882	0.0995691	1.04162	0.562835	0.173732
7	19671579	19677942	-	Apoc2	protein_coding	Apoc2	ensembl_havana	17	9.40677	8.90574	9.03269	88.9253	107.425	107.706	10.854	12.5453	7.39664	11.8766	8.25152	37.3105
7	19678083	19681480	-	Apoc4	protein_coding	Apoc4	ensembl_havana	5	0.0001	0.0001	0.0562242	0.0549061	0.610216	0.0001	0.0001	0.0563928	0.0001	0.0001	0.112647	0.0001
7	19696109	19699189	-	Apoe	protein_coding	Apoe	ensembl_havana	16	27.3256	19.2524	27.3326	344.833	395.73	489.858	45.1764	47.5112	36.0079	51.2579	37.3094	78.6554
15	77583819	77596126	-	Apol10b	protein_coding	Apol10b	ensembl_havana	8	0.0001	0.0001	0.0001	0.0549061	0.0001	0.0001	0.0001	0.0001	0.298507	0.0001	0.112647	0.0579772
15	77633946	77643287	-	Apol11b	protein_coding	Apol11b	ensembl_havana	9	0.0001	1.15524	0.280721	0.341371	0.328624	0.0001	0.27624	0.900786	0.0001	0.223284	0.281468	0.231609
1	71652837	71662844	+	Apol7d	antisense	Apol7d	ensembl_havana	10	0.0001	0.0001	0.0001	0.0549061	0.470971	0.741578	0.055328	0.0001	0.0001	0.0001	0.0563735	0.120011
6	134981718	134986837	+	Apold1	protein_coding	Apold1	ensembl_havana	2	0.0001	0.880205	1.01034	0.164518	0.047032	0.671685	0.662836	0.450443	0.397976	0.372073	0.619109	0.0579772
17	35128997	35132051	-	Apom	protein_coding	Apom	ensembl_havana	7	0.0001	0.275133	0.0562242	0.0001	0.0001	0.0560654	0.386696	0.281564	0.0001	0.520862	0.225194	0.0001
10	128254096	128255897	+	Apon	protein_coding	Apon	ensembl_havana	6	0.0733587	0.0001	0.0001	0.0001	0.23476	0.0001	0.386696	0.225271	0.348242	0.372073	0.0001	0.0579772
X	94367117	94417094	+	Apoo	protein_coding	Apoo	ensembl_havana	8	0.00010014	0.605172	1.10407	1.42793	1.19207	2.68644	4.73232	2.77457	5.53748	2.37435	4.22259	4.45613
X	112311334	112372756	+	Apool	protein_coding	Apool	ensembl_havana	12	1.02572	2.86044	4.37779	6.85086	5.7258	4.58926	8.50521	7.26188	8.90258	5.4309	8.9476	8.50805
13	107414144	107414730	-	Apoo-ps	processed_pseudogene	Apoo-ps	havana	7	0.219876	0.0001	0.635984	0.216449	1.1078	0.0001	0.680226	0.659498	0.977938	1.12239	0.729684	0.000611845
12	111713261	111755054	+	Apopt1	protein_coding	Apopt1	ensembl_havana	14	1.2455	2.4754	3.87267	9.26233	10.3048	12.5923	12.4259	11.5933	13.7176	11.5313	14.2373	10.7981
16	84949685	85173767	-	App	protein_coding	App	ensembl_havana	11	398.882	414.478	457.357	429.336	482.451	531.715	349.039	348.449	421.888	352.257	351.759	491.116
11	85187262	85235131	-	Appbp2	protein_coding	Appbp2	ensembl_havana	9	93.0386	79.6496	94.0643	82.4833	75.6545	72.7551	89.0826	88.9991	88.8757	79.3791	91.8385	84.7324
11	85234775	85238305	+	Appbp2os	antisense	Appbp2os	ensembl_havana	4	1.39202	0.110113	0.673591	0.164518	0.23476	0.223962	0.165784	0.337857	0.497445	0.0001	0.281468	0.0001
14	26918988	26971233	-	Appl1	protein_coding	Appl1	ensembl_havana	11	61.9037	64.6878	88.8402	63.6577	54.6289	73.8483	91.3472	85.3964	97.3306	70.6232	92.1198	97.118
10	83600033	83648739	-	Appl2	protein_coding	Appl2	ensembl_havana	14	28.4245	27.5034	20.5416	50.7506	51.0152	40.0714	35.5117	37.8289	29.244	33.4777	40.7421	37.794
8	122574635	122576910	-	Aprt	protein_coding	Aprt	ensembl_havana	8	55.3105	48.901	48.0986	87.6898	95.0373	84.7877	55.0072	46.723	52.0224	57.0606	40.2356	61.9288
4	40682382	40703195	-	Aptx	protein_coding	Aptx	ensembl_havana	15	10.4028	12.4316	9.93409	15.017	14.549	9.62615	16.6237	15.7058	16.3628	13.8375	15.194	12.1543
6	55336432	55348556	+	Aqp1	protein_coding	Aqp1	ensembl_havana	5	0.0001	1.04522	0.0562242	0.548161	0.422488	0.279927	0.165784	0.112686	0.149304	0.520862	0.506562	0.0579772
7	97724006	97738290	-	Aqp11	protein_coding	Aqp11	ensembl_havana	9	0.659428	0.0551066	0.0001	0.822192	0.281692	0.895546	2.3749	2.47699	1.64134	2.15754	2.53241	1.44703
18	15389496	15410983	-	Aqp4	protein_coding	Aqp4	ensembl_havana	10	0.0001	0.0001	0.0001	0.0549061	0.093964	0.0001	0.331468	0.225271	0.0995691	1.26481	0.112647	0.0579772
4	41033074	41048140	-	Aqp7	protein_coding	Aqp7	ensembl_havana	13	0.0001	0.0001	0.336845	0.109712	0.0001	0.0001	0.055328	0.0001	0.199038	0.0001	0.168921	0.0001
9	71110659	71168683	-	Aqp9	protein_coding	Aqp9	ensembl_havana	13	10.1831	14.4118	19.812	0.602967	1.0326	0.391858	0.0001	0.0563928	0.0001	0.0001	0.112647	0.405241
2	114101170	114187025	-	Aqr	protein_coding	Aqr	ensembl_havana	16	41.6842	36.3044	41.3637	66.2608	76.4051	79.6391	121.888	108.308	114.987	103.855	114.46	93.5297
X	20797814	20860520	+	Araf	protein_coding	Araf	ensembl_havana	12	54.2116	52.9715	41.5882	97.555	92.1279	65.0879	85.6587	71.7736	66.9926	70.5262	76.8697	78.2502
7	101348067	101412587	+	Arap1	protein_coding	Arap1	ensembl_havana	18	262.008	225.674	190.409	286.459	291.161	302.251	166.185	149.031	149.206	169.156	155.019	266.164
5	62602445	62766160	-	Arap2	protein_coding	Arap2	ensembl_havana	13	28.9373	34.3242	33.9553	13.1803	11.1326	16.4983	59.9441	57.4645	54.3545	50.358	65.5394	24.5712
18	37972624	37997575	-	Arap3	protein_coding	Arap3	ensembl	8	285.343	240.984	234.712	21.1005	25.578	37.2171	21.3733	22.4609	27.3044	20.2354	17.1635	19.852
15	74669083	74672571	-	Arc	protein_coding	Arc	ensembl_havana	14	0.0001	0.0001	0.505218	0.548161	1.0326	0.951512	0.938976	0.619321	0.54718	0.967229	0.281468	1.09977
9	44741564	44767846	-	Arcn1	protein_coding	Arcn1	ensembl_havana	16	102.894	108.542	131.62	167.756	185.295	205.392	224.576	221.036	251.976	178.652	243.49	219.585
12	84918148	84970901	-	Arel1	protein_coding	Arel1	ensembl_havana	13	98.6073	105.668	83.7936	110.929	109.915	109.636	110.955	93.7276	112.748	84.1556	90.1506	95.7297
11	59211412	59228271	-	Arf1	protein_coding	Arf1	ensembl_havana	14	224.533	225.77	246.852	239.38	261.258	293.938	286.961	251.694	305.782	233.081	251.328	268.239
11	103966739	103985338	+	Arf2	protein_coding	Arf2	ensembl_havana	13	3.80955	7.26097	7.80137	28.7183	27.6901	26.8075	20.6553	18.0138	19.2473	20.2354	21.4404	26.0448
15	98736634	98763215	-	Arf3	protein_coding	Arf3	ensembl_havana	10	168.056	152.038	145.755	184.477	184.677	160.845	189.598	158.408	158.902	143.433	143.216	159.683
14	26638074	26665085	+	Arf4	protein_coding	Arf4	ensembl_havana	12	35.673	41.353	44.8431	83.3611	75.902	108.263	107.532	110.671	137.71	130.615	111.063	118.303
6	28423560	28426603	+	Arf5	protein_coding	Arf5	ensembl_havana	13	66.4323	52.2016	38.8819	54.2035	60.4955	53.2576	43.7405	37.5473	43.8662	39.8756	27.743	48.4433
12	69372150	69373784	+	Arf6	protein_coding	Arf6	ensembl_havana	8	71.2808	61.8825	63.7572	73.3847	79.594	88.9279	93.1126	84.8897	88.3281	76.4777	58.8622	65.2856
2	180967225	180982527	+	Arfgap1	protein_coding	Arfgap1	ensembl_havana	19	31.2083	32.564	27.7255	34.802	36.5601	28.7104	38.8254	33.3818	36.8037	32.8081	32.4136	39.7039
2	91264974	91276932	+	Arfgap2	protein_coding	Arfgap2	ensembl_havana	14	16.4824	19.2703	17.7595	31.0141	29.9644	28.0805	43.674	31.1716	35.5911	22.1456	33.6081	31.7113
15	83299739	83350248	-	Arfgap3	protein_coding	Arfgap3	ensembl_havana	8	9.52373	12.4316	12.5719	19.6207	22.0581	20.4834	26.014	22.3484	28.498	22.0209	21.1027	24.7137
1	10137571	10232671	-	Arfgef1	protein_coding	Arfgef1	ensembl_havana	11	717.198	815.404	923.426	201.138	192.375	291.524	172.368	165.447	241.96	135.397	194.481	200.197
2	166805588	166898053	+	Arfgef2	protein_coding	Arfgef2	ensembl_havana	10	141.389	129.596	118.759	84.292	87.9036	88.6494	106.535	90.9692	92.2081	86.6698	92.6263	86.1214
10	18581839	18743950	-	Arfgef3	protein_coding	Arfgef3	ensembl_havana	7	0.879204	1.21024	1.34708	14.6881	15.1591	4.98102	59.3152	51.0015	29.0451	44.1905	60.044	16.2636
3	84496093	84582626	-	Arfip1	protein_coding	Arfip1	ensembl_havana	9	25.4645	28.3285	39.6799	44.5025	41.7696	38.8401	38.8804	37.4911	37.0024	32.6593	46.932	41.6139
7	105634203	105640417	-	Arfip2	protein_coding	Arfip2	ensembl_havana	15	17.4357	12.3216	15.4904	25.5398	25.625	22.778	34.1862	30.7923	32.9741	34.5192	27.1319	30.9644
2	181357690	181365405	-	Arfrp1	protein_coding	Arfrp1	ensembl_havana	15	18.6828	23.5486	24.7972	31.9494	30.5305	27.3568	27.113	26.4499	31.0183	19.4038	21.5297	25.6701
10	24915221	24927485	-	Arg1	protein_coding	Arg1	ensembl_havana	9	0.0001	0.330139	2.24507	0.0001	0.093964	0.112031	0.441924	0.450443	0.54718	0.297678	0.0001	0.0579772
12	79130777	79156302	+	Arg2	protein_coding	Arg2	ensembl_havana	6	25.1708	24.8112	29.1037	0.552644	0.663074	0.572362	0.0953724	0.0566853	0.0001	0.148889	0.0563735	0.0001
8	8665075	8690522	-	Arglu1	protein_coding	Arglu1	ensembl_havana	11	67.5447	100.497	89.0129	179.104	171.724	116.408	195.01	205.301	147.911	221.027	208.946	137.632
2	91649860	91672327	+	Arhgap1	protein_coding	Arhgap1	ensembl_havana	16	60.763	51.1561	43.7771	43.1744	47.3545	43.7104	42.2425	36.4778	42.6227	41.6611	35.3922	44.5655
8	77250366	77517954	-	Arhgap10	protein_coding	Arhgap10	ensembl_havana	8	10.9889	6.42823	11.2811	0.712579	0.46942	2.29468	4.91539	5.00907	8.40314	4.61256	3.60161	1.85217
2	113831492	113848662	-	Arhgap11a	protein_coding	Arhgap11a	ensembl_havana	14	51.0615	61.9924	96.197	95.3084	93.8164	106.502	159.057	158.465	169.347	145.143	170.791	158.641
18	6024427	6136099	-	Arhgap12	protein_coding	Arhgap12	ensembl_havana	16	0.952463	0.220126	0.280721	16.1131	15.2061	11.0812	6.79314	10.5269	4.1778	15.1766	16.3757	13.6591
2	43748824	44395954	+	Arhgap15	protein_coding	Arhgap15	ensembl_havana	15	61.5354	68.3665	82.3897	116.681	112.119	107.002	106.643	94.2866	107.527	76.2546	109.847	104.987
2	44059238	44065325	-	Arhgap15os	antisense	Arhgap15os	havana	1	0.0751456	0.611972	0.0571821	0.166794	0.0001	0.226988	0.222224	0.342235	0.0001	0.223614	0.057041	0.29191
7	123279218	123369916	-	Arhgap17	protein_coding	Arhgap17	ensembl_havana	15	42.0506	31.9589	35.1339	156.087	155.767	137.451	164.358	149.627	146.619	218.944	172.986	183.53
10	26753421	26918649	+	Arhgap18	protein_coding	Arhgap18	ensembl_havana	16	32.82	45.8209	50.7923	35.3499	39.4699	51.1523	41.8078	42.6139	47.5461	41.8841	56.0487	49.7745
19	41766588	41802085	-	Arhgap19	protein_coding	Arhgap19	ensembl_havana	14	87.2513	93.7314	131.049	55.1348	50.4049	82.3812	141.827	128.574	166.014	105.268	120.032	104.989
2	20847919	20968882	-	Arhgap21	protein_coding	Arhgap21	ensembl_havana	16	12.3808	10.0113	10.2708	14.1949	11.78	15.7824	34.5176	35.8024	31.1837	30.9483	30.4441	20.8359
14	33214026	33369935	+	Arhgap22	protein_coding	Arhgap22	ensembl_havana	14	0.0680585	0.330139	0.224597	0.876971	1.45499	1.39923	0.662836	0.00186285	0.230781	0.345161	0.394015	0.694609
11	97415533	97502403	+	Arhgap23	protein_coding	Arhgap23	ensembl_havana	16	27.9116	19.4012	28.0013	14.6333	18.2566	17.0695	17.2156	15.8126	16.7607	16.4413	11.086	11.6913
5	102481391	102897938	+	Arhgap24	protein_coding	Arhgap24	ensembl_havana	14	8.8644	6.60089	6.95951	27.5676	30.459	20.7632	10.7696	10.6957	7.46029	15.3998	12.8305	19.2153
6	87458545	87533260	-	Arhgap25	protein_coding	Arhgap25	ensembl_havana	14	128.204	125.689	128.693	47.6266	53.2211	54.7906	30.3755	31.1301	36.7043	38.9085	36.4653	40.1669
18	38601534	39376285	+	Arhgap26	protein_coding	Arhgap26	ensembl_havana	17	50.6165	50.7982	58.379	257.343	256.685	214.803	133.423	134.794	158.857	155.813	136.741	225.66
11	103331497	103363693	-	Arhgap27	protein_coding	Arhgap27	ensembl_havana	17	77.8742	65.0855	64.6552	66.9663	68.3412	60.6948	47.5991	39.1538	39.4396	48.5458	39.1815	44.2762
11	103355701	103361093	+	Arhgap27os2	antisense	Arhgap27os2	havana	1	0.0001	0.0423919	0.0001	0.77427	0.883122	0.419803	0.449592	0.279481	0.0001	0.405918	0.210128	0.00010052
11	103344753	103350125	+	Arhgap27os3	antisense	Arhgap27os3	havana	2	1.97808	0.770192	1.23483	3.50769	3.00375	1.17537	4.25266	3.99689	1.64134	6.17485	5.00845	3.53061
1	171388954	171410299	+	Arhgap30	protein_coding	Arhgap30	ensembl_havana	16	427.669	446.674	423.954	410.583	392.546	401.997	228.758	229.055	215.01	274.442	277.947	353.92
16	38598340	38713275	-	Arhgap31	protein_coding	Arhgap31	ensembl_havana	4	105.493	105.393	109.498	113.942	110.525	127.433	94.3295	94.4032	117.672	77.9656	85.367	133.06
9	32116136	32268447	+	Arhgap32	protein_coding	Arhgap32	ensembl_havana	14	0.0001	0.330139	0.0562242	0.931804	1.0326	0.72765	1.32557	1.63259	2.38736	1.4136	1.23812	2.83608
7	30522226	30535061	-	Arhgap33	protein_coding	Arhgap33	ensembl_havana	7	10.4028	7.09594	6.56664	10.5777	9.29263	9.45825	27.9454	20.7159	19.0981	23.4344	17.6137	19.389
7	16493719	16614994	-	Arhgap35	protein_coding	Arhgap35	ensembl_havana	12	1.97808	1.7053	2.75019	14.9074	18.3036	12.4804	35.0147	35.0705	33.0239	35.9327	33.0327	26.1027
15	76723985	76818171	-	Arhgap39	protein_coding	Arhgap39	ensembl_havana	15	15.0914	11.3864	14.424	33.706	35.6685	41.8621	24.4109	23.5868	26.061	28.8651	18.8518	40.8035
X	73891442	73921871	-	Arhgap4	protein_coding	Arhgap4	ensembl_havana	17	377.71	321.011	274.949	128.038	127.678	122.485	77.251	82.3581	76.8372	77.2248	83.7253	106.893
11	65002039	65162962	-	Arhgap44	protein_coding	Arhgap44	ensembl_havana	16	0.0733587	0.0001	0.0001	0.219324	0.047032	0.0001	0.055328	0.112686	0.0001	0.0001	0.112647	0.0001
10	80016653	80031473	+	Arhgap45	protein_coding	Arhgap45	ensembl_havana	14	631.037	596.639	583.386	661.187	648.569	566.133	510.152	457.039	488.801	444.122	437.478	553.467
12	52503972	52571976	+	Arhgap5	protein_coding	Arhgap5	ensembl_havana	9	0.0001	0.440153	0.617467	0.493355	0.328624	1.23134	0.607608	0.281564	0.156173	0.81844	0.562835	1.85217
X	168795099	169304436	+	Arhgap6	protein_coding	Arhgap6	ensembl_havana	16	0.219876	0.110113	0.280721	2.6856	2.3467	3.52592	1.21512	1.63259	1.98948	3.49664	2.08222	2.19943
10	127321964	127329944	+	Arhgap9	protein_coding	Arhgap9	ensembl_havana	10	143.207	132.62	117.183	90.8134	102.404	78.2299	66.4943	50.6019	47.7452	60.4742	51.8282	68.9289
11	120578104	120581625	-	Arhgdia	protein_coding	Arhgdia	ensembl_havana	13	250.259	194.773	185.6	421.69	472.734	412.254	491.634	425.15	438.331	452.037	368.297	475.02
6	136923655	136941900	-	Arhgdib	protein_coding	Arhgdib	ensembl_havana	13	3275.29	2667.2	2436.71	801.514	852.607	1232.67	786.683	851.299	1094.24	1095.88	792.451	877.487
7	24902912	24926595	+	Arhgef1	protein_coding	Arhgef1	ensembl_havana	18	448.781	340.66	268.497	343.034	331.95	270.312	208.265	175.859	179.194	196.921	158.016	228.152
8	14911663	15001086	+	Arhgef10	protein_coding	Arhgef10	ensembl_havana	10	0.0001	0.0001	0.0562242	0.109712	0.140896	0.0560654	0.055328	0.168979	0.0001	0.0001	0.225194	0.115854
4	140514485	140666013	-	Arhgef10l	protein_coding	Arhgef10l	ensembl_havana	16	23.3696	17.9322	17.2864	114.874	114.14	101.521	57.2718	44.9217	47.049	61.1525	48.0015	81.4909
3	87617559	87738035	+	Arhgef11	protein_coding	Arhgef11	ensembl_havana	18	69.8437	63.386	61.1289	70.6367	69.8961	73.1555	56.1081	48.3094	66.3627	60.5741	58.1238	91.1449
9	42963842	43107240	-	Arhgef12	protein_coding	Arhgef12	ensembl_havana	14	42.9586	36.8448	17.558	11.9418	11.5911	17.6226	8.91487	9.06973	6.93805	8.60204	7.15849	10.7793
11	68943155	68957481	-	Arhgef15	protein_coding	Arhgef15	ensembl_havana	13	0.0001	0.0001	0.0001	0.328937	0.187828	0.167996	0.994204	0.39415	0.0001	1.19041	0.450288	0.405241
7	100869752	100932108	-	Arhgef17	protein_coding	Arhgef17	ensembl_havana	8	1.17224	2.36538	0.336845	11.9478	13.4695	11.529	4.41834	4.39094	4.37674	6.24924	6.30273	9.26047
8	3393006	3456602	+	Arhgef18	protein_coding	Arhgef18	ensembl_havana	12	111.939	110.343	86.2072	179.214	167.264	135.437	119.403	107.349	100.365	124.537	108.889	148.745
4	141239499	141257565	+	Arhgef19	protein_coding	Arhgef19	ensembl_havana	11	0.0001	0.0001	0.0001	0.0549061	0.328624	0.0001	0.0001	0.0001	0.0001	0.0001	0.0001	0.115854
3	88605966	88648053	+	Arhgef2	protein_coding	Arhgef2	ensembl_havana	15	161.609	164.765	196.885	138.496	135.258	173.828	165.297	148.67	178.896	122.677	133.875	161.71
3	62338344	62462222	+	Arhgef26	protein_coding	Arhgef26	ensembl_havana	14	0.0001	0.495159	0.0001	0.0001	0.0001	0.0560654	0.110556	0.281564	0.0995691	0.0001	0.0563735	0.115854
13	97899469	98206440	-	Arhgef28	protein_coding	Arhgef28	ensembl_havana	10	1.61179	1.6503	3.4798	2.08273	2.3467	6.65998	11.598	11.315	23.6737	2.08315	4.10807	8.27655
14	27114899	27403912	+	Arhgef3	protein_coding	Arhgef3	ensembl_havana	10	100.951	93.6199	82.2223	84.1818	82.6463	78.6319	47.441	45.4846	51.9726	60.7059	58.8621	65.5751
17	80307407	80400082	+	Arhgef33	protein_coding	Arhgef33	ensembl_havana	7	0.0001	0.0001	0.168473	0.0549061	0.093964	0.0001	0.055328	0.112686	0.0995691	0.0001	0.168921	0.0001
18	61493794	61536537	-	Arhgef37	protein_coding	Arhgef37	ensembl	7	0.952463	1.21024	0.449094	118.82	122.915	108.741	12.4816	12.4971	13.0803	9.44821	9.39778	52.8999
3	133112278	133234950	-	Arhgef38	protein_coding	Arhgef38	ensembl_havana	14	0.0001	0.0001	0.0562242	0.548161	1.12647	0.167996	0.773292	0.563028	0.646649	0.892835	0.112647	0.115854
4	43496142	43499696	-	Arhgef39	protein_coding	Arhgef39	ensembl_havana	14	13.4064	13.3117	23.1233	9.70078	8.63559	19.532	29.8232	25.9511	34.0185	19.4915	16.8822	27.6654
1	34678188	34813310	+	Arhgef4	protein_coding	Arhgef4	ensembl_havana	20	14.2015	15.2081	11.4315	10.535	10.8276	6.54787	4.63746	5.2936	5.35815	5.66257	5.34638	4.68445
14	51984719	52006252	+	Arhgef40	protein_coding	Arhgef40	ensembl_havana	16	0.0001	0.110113	0.112348	0.383773	0.375556	1.17537	0.998081	0.680429	0.696383	1.19041	1.4711	1.79429
6	43265582	43289321	+	Arhgef5	protein_coding	Arhgef5	ensembl_havana	13	0.0001	0.110113	0.0001	0.109712	0.0001	0.0001	0.055328	0.168979	0.0001	0.0001	0.0001	0.289486
X	57231485	57338730	-	Arhgef6	protein_coding	Arhgef6	ensembl_havana	12	198.677	188.782	209.509	247.448	246.303	247.541	258.683	252.421	238.078	253.236	265.331	241.575
8	11727721	11835220	+	Arhgef7	protein_coding	Arhgef7	ensembl_havana	15	51.8673	48.186	46.4709	72.6729	79.6909	75.7774	81.2406	69.6342	74.9004	67.1783	71.2985	81.8964
4	133679008	133756770	-	Arid1a	protein_coding	Arid1a	ensembl_havana	16	418.389	323.554	352.468	327.105	332.696	403.386	448.795	414.342	458.817	544.712	387.054	465.325
17	4994332	5347657	+	Arid1b	protein_coding	Arid1b	ensembl_havana	14	106.959	94.3923	89.4054	115.915	114.982	124.972	161.819	154.636	150.796	158.758	130.328	130.976
15	96287518	96404993	+	Arid2	protein_coding	Arid2	ensembl_havana	19	151.792	155.944	152.489	110.489	117.424	135.27	167.175	152.611	169.295	187.326	147.943	156.847
10	79927043	79955019	+	Arid3a	protein_coding	Arid3a	ensembl_havana	12	306.807	288.354	262.601	215.994	227.341	190.561	181.585	162.799	152.039	218.574	170.453	221.436
9	57790353	57836794	-	Arid3b	protein_coding	Arid3b	ensembl_havana	15	95.0166	82.062	63.0276	14.4141	12.0147	12.0886	3.09287	3.99689	3.68046	7.29077	4.95217	6.5981
12	71015990	71098593	+	Arid4a	protein_coding	Arid4a	ensembl_havana	17	81.7568	93.1812	112.024	112.846	104.845	137.563	74.9442	88.4357	96.983	92.5471	100.898	117.607
13	14063232	14199604	+	Arid4b	protein_coding	Arid4b	ensembl_havana	18	48.2777	67.4932	70.0437	50.312	46.6974	50.4811	41.7526	45.6536	51.9317	42.3305	60.8319	49.8322
1	36307733	36324030	+	Arid5a	protein_coding	Arid5a	ensembl_havana	16	25.5674	23.8729	21.6641	39.8989	38.3435	31.2288	38.5493	30.4545	31.4323	34.5936	31.5133	37.736
10	68092520	68278741	-	Arid5b	protein_coding	Arid5b	ensembl_havana	10	58.9735	62.5429	51.3537	87.4703	81.2392	62.0655	81.8479	85.5097	83.2554	97.9032	97.0718	79.234
9	59388258	59486619	-	Arih1	protein_coding	Arih1	ensembl_havana	11	133.697	155.283	182.347	144.688	137.605	149.092	137.407	128.517	162.782	116.948	144.905	156.153
9	108602942	108649387	-	Arih2	protein_coding	Arih2	ensembl_havana	12	43.598	50.3235	53.1892	66.079	63.145	52.6243	50.0265	49.5914	50.5678	47.2247	48.1126	50.5423
10	88730858	88744095	+	Arl1	protein_coding	Arl1	ensembl_havana	14	18.2415	20.4065	22.6937	40.8855	42.3328	47.8173	67.9858	65.1767	72.3639	50.6629	66.4794	60.8291
13	54575015	54581129	+	Arl10	protein_coding	Arl10	ensembl_havana	10	2.05134	2.14536	1.51545	15.4006	19.8523	10.8014	14.2489	12.3845	8.55444	20.0122	12.324	13.3697
14	61309753	61311937	+	Arl11	protein_coding	Arl11	ensembl_havana	8	46.6658	42.85	37.7157	47.1333	54.5814	44.1566	31.6459	31.6368	34.267	31.5434	34.3831	50.2951
16	62793685	62847041	-	Arl13b	protein_coding	Arl13b	ensembl_havana	11	7.91204	6.60089	5.94927	10.0296	9.33956	8.95456	13.4205	12.1594	12.9808	8.1835	14.4061	13.9485
3	69222419	69223619	+	Arl14	protein_coding	Arl14	ensembl_havana	1	1.17224	0.330139	0.729715	0.0001	0.0001	0.0001	0.0001	0.0001	0.0001	0.0001	0.0001	0.0001
2	106962527	106974425	-	Arl14ep	protein_coding	Arl14ep	ensembl_havana	15	15.0181	17.4372	19.7558	34.9664	36.1847	28.7663	43.4645	39.4052	34.9634	32.7337	50.5337	31.4853
18	46921815	46934233	+	Arl14epl	protein_coding	Arl14epl	ensembl_havana	2	0.0001	0.16512	0.0562242	0.328937	0.281692	0.0560654	0.956474	0.281564	0.646649	1.04162	0.619109	0.463118
13	113794505	114157462	+	Arl15	protein_coding	Arl15	ensembl_havana	10	3.66303	4.89568	6.90338	13.4824	14.7367	10.8574	14.3042	16.2687	18.4516	11.1593	14.4061	13.7749
11	120464866	120467608	-	Arl16	protein_coding	Arl16	ensembl_havana	12	9.01092	3.68554	2.63794	5.69994	6.28898	6.65998	9.27841	8.10627	8.95231	10.7129	7.6533	6.19296
19	6134374	6141407	-	Arl2	protein_coding	Arl2	ensembl_havana	5	5.12821	3.57553	3.81655	8.60466	10.3251	6.21226	18.4463	14.6925	15.567	13.4655	9.67915	8.16079
8	94666600	94674426	+	Arl2bp	protein_coding	Arl2bp	ensembl_havana	17	67.7645	76.6792	52.0274	28.9377	31.3037	24.9047	37.2238	32.9314	26.1605	31.9897	31.6258	26.6815
19	46531109	46573086	-	Arl3	protein_coding	Arl3	ensembl	8	2.41764	4.89568	4.65841	2.41157	2.39363	3.24609	2.48536	5.12275	5.12276	2.82709	4.0518	3.99363
12	40005447	40038026	-	Arl4a	protein_coding	Arl4a	ensembl_havana	18	0.0001	0.0001	0.336845	1.69909	1.87738	2.51854	3.1481	3.60284	4.27727	3.71983	3.09515	1.85217
1	88673125	88702222	-	Arl4c	protein_coding	Arl4c	ensembl_havana	12	27.3989	38.5048	28.1183	34.802	34.1197	33.8592	12.6473	12.3845	12.7321	16.1437	15.813	28.1863
11	101665541	101667833	+	Arl4d	protein_coding	Arl4d	ensembl_havana	2	0.0001	0.0001	0.0001	0.383743	0.844876	0.112031	0.331468	0.112686	0.298507	1.85996	0.281468	0.231609
2	52397951	52424902	-	Arl5a	protein_coding	Arl5a	ensembl_havana	7	24.4685	28.5485	40.1851	88.7311	93.5356	78.6875	96.8148	91.0256	85.7922	78.7095	100.898	98.2755
2	15049395	15082457	+	Arl5b	protein_coding	Arl5b	ensembl_havana	13	23.2231	26.5131	27.6131	24.8273	21.3072	22.6661	24.8527	25.5008	26.6081	22.4672	32.076	27.6076
11	97989578	97996182	-	Arl5c	protein_coding	Arl5c	ensembl_havana	15	1.46527	0.935212	1.34708	46.8593	50.499	55.8536	17.176	18.1827	14.7713	21.5001	24.7042	42.482
16	59612949	59639392	-	Arl6	protein_coding	Arl6	ensembl_havana	18	0.0001	0.0001	0.112348	0.164518	0.70408	0.72765	2.43013	2.42069	2.13868	2.08315	1.57576	1.2734
7	118118891	118129663	-	Arl6ip1	protein_coding	Arl6ip1	ensembl_havana	9	134.649	134.216	183.19	150.607	146.053	170.414	237.203	193.028	242.358	224.894	211.081	221.034
5	124116089	124118197	+	Arl6ip4	protein_coding	Arl6ip4	ensembl_havana	15	15.6775	10.2863	12.0107	19.7851	18.5382	20.6513	31.0382	34.6202	34.864	31.9897	31.5695	20.778
6	97210689	97233316	+	Arl6ip5	protein_coding	Arl6ip5	ensembl_havana	6	16.9961	20.6276	26.3224	76.7835	81.9903	62.6254	54.7311	51.2266	46.85	46.8687	61.2257	66.3274
2	53191726	53219221	+	Arl6ip6	protein_coding	Arl6ip6	ensembl_havana	6	17.0694	17.8772	19.6997	22.2514	21.448	19.1962	24.4662	22.3483	25.6631	20.2354	23.7475	21.5304
1	135146824	135156270	+	Arl8a	protein_coding	Arl8a	ensembl_havana	10	99.9256	78.4944	69.4816	69.0007	81.3804	81.1494	29.271	38.0541	37.8481	66.8811	36.5217	65.286
6	108783099	108825279	+	Arl8b	protein_coding	Arl8b	ensembl_havana	8	56.8488	56.877	75.9921	97.7737	96.8209	124.467	149.282	153.512	153.979	143.508	157.565	130.282
5	77004055	77010607	+	Arl9	protein_coding	Arl9	ensembl_havana	11	0.0001	0.0001	0.0001	0.383743	0.093964	0.112031	0.0001	0.0563928	0.0001	0.0001	0.0563735	0.0001
3	19131402	19163066	-	Armc1	protein_coding	Armc1	ensembl_havana	9	9.15744	14.1918	15.7106	26.4715	24.9679	27.0837	40.2578	35.4083	43.5675	37.0486	40.5171	30.9644
5	21645813	21662695	+	Armc10	protein_coding	Armc10	ensembl_havana	16	4.54214	5.28073	7.96975	21.484	23.5131	20.7632	27.7782	32.3123	31.4324	27.6749	29.4873	23.4403
17	28530806	28539111	+	Armc12	protein_coding	Armc12	ensembl_havana	3	2.34438	1.15524	1.29096	0.274131	0.422488	0.0001	0.055328	0.0563928	0.0498345	0.223284	0.0563735	0.347363
10	41914990	42018443	-	Armc2	protein_coding	Armc2	ensembl_havana	11	0.0001	0.0001	0.0001	0.109712	0.23476	0.0560654	0.055328	0.168979	0.248773	0.892835	0.675383	0.463118
2	19199302	19310242	+	Armc3	protein_coding	Armc3	ensembl_havana	14	2.93045	5.11571	3.36756	0.822192	0.985672	2.79837	0.331468	0.0563928	0.298507	0.148889	0.225194	1.04189
7	128237342	128245101	+	Armc5	protein_coding	Armc5	ensembl_havana	6	10.5555	8.64358	7.81347	24.8672	26.4402	19.4303	31.1716	22.8611	26.7794	24.4233	18.5692	22.3531
8	70220172	70234467	-	Armc6	protein_coding	Armc6	ensembl_havana	11	1.02572	1.59529	4.09717	3.6173	4.42003	4.50587	6.68269	3.82801	4.89673	3.27346	4.38944	4.10938
11	115475667	115490468	+	Armc7	protein_coding	Armc7	ensembl_havana	11	22.1242	24.533	19.9242	8.99722	10.7006	13.8931	4.74971	4.33903	8.00736	8.19638	6.24646	8.45017
9	99478372	99568900	-	Armc8	protein_coding	Armc8	ensembl_havana	11	33.1131	39.5499	36.3125	32.829	30.1774	28.7103	43.6302	39.8554	45.9051	32.9569	40.6858	40.4563
1	86154780	86278285	+	Armc9	protein_coding	Armc9	ensembl_havana	13	0.366393	0.770192	0.673591	2.6856	2.50739	1.94639	5.53231	3.57387	4.23196	3.94301	5.14532	1.50491
X	134717963	134721918	+	Armcx1	protein_coding	Armcx1	ensembl_havana	14	0.0001	0.110113	0.336845	0.0549061	0.375556	0.112031	1.65694	1.35113	2.08895	0.297678	1.12557	0.0579772
X	134804145	134809222	-	Armcx2	protein_coding	Armcx2	ensembl_havana	13	0.0001	0.220126	0.168473	1.31545	1.40806	0.167996	5.19153	4.95387	7.16187	2.45512	2.47614	1.56279
X	134756595	134761456	+	Armcx3	protein_coding	Armcx3	ensembl_havana	11	6.78935	4.95069	8.53099	17.2045	15.8631	21.7147	22.9404	22.9113	33.2725	18.9707	24.4788	25.9291
X	134686519	134696758	+	Armcx4	protein_coding	Armcx4	ensembl_havana	9	0.219876	0.385146	0.280721	1.37025	2.81602	1.34327	21.2077	21.8417	20.4907	12.9448	16.6571	4.5724
X	135742733	135747323	+	Armcx5	protein_coding	Armcx5	ensembl_havana	2	7.90558	9.96689	5.53952	9.18119	8.74406	6.36971	10.7963	9.94261	7.57976	10.6569	11.9037	7.53597
X	134748461	134751418	-	Armcx6	protein_coding	Armcx6	ensembl_havana	14	0.0001	0.0001	0.0001	0.144891	0.187828	0.0560654	0.607608	0.337857	0.788387	0.669651	0.225194	0.289486
13	24741232	24746593	+	Armh2	protein_coding	Armh2	havana	1	0.293135	0.385146	0.336845	0.0001	0.0001	0.0001	0.165784	0.563028	0.0001	0.223284	0.225194	0.231609
19	45818144	45998489	-	Armh3	protein_coding	Armh3	ensembl	9	9.01092	8.52612	8.8116	17.6477	17.7404	13.5997	21.7599	20.3781	17.4569	21.0538	18.5704	20.1414
10	4432467	4455142	+	Armt1	protein_coding	Armt1	ensembl_havana	15	19.7799	25.4681	24.0774	33.9799	28.7908	30.3893	53.7922	48.9634	48.2925	46.7199	47.1573	39.9933
3	95434388	95497241	+	Arnt	protein_coding	Arnt	ensembl_havana	18	75.2364	78.6596	70.2677	83.5791	85.0876	80.5343	78.2584	69.3531	74.6025	70.3026	77.489	84.5585
7	84246278	84410177	-	Arnt2	protein_coding	Arnt2	ensembl_havana	9	0.0001	0.16512	0.0001	0.0549061	0.187828	0.0560654	0.110556	0.0563928	0.248773	0.0001	0.168921	0.0001
7	113207465	113314127	+	Arntl	protein_coding	Arntl	ensembl_havana	8	5.8608	5.22572	6.39826	21.21	23.513	17.3494	14.2489	17.0568	15.0697	17.334	18.3453	18.5787
5	145083830	145108762	+	Arpc1a	protein_coding	Arpc1a	ensembl_havana	14	53.1129	53.9614	37.7155	48.5583	53.6898	41.9742	50.4232	41.6568	42.5729	43.1489	39.4478	39.3565
5	145114215	145130706	+	Arpc1b	protein_coding	Arpc1b	ensembl_havana	16	458.23	467.686	417.361	455.445	511.224	431.46	377.033	308.542	334.035	276.082	280.208	381.957
1	74236084	74268210	+	Arpc2	protein_coding	Arpc2	ensembl_havana	14	779.617	707.31	743.351	482.593	519.468	630.454	385.265	419.513	460.249	702.844	471.148	499.557
5	122391878	122414185	+	Arpc3	protein_coding	Arpc3	ensembl_havana	14	226.955	227.012	229.545	155.43	164.68	177.918	135.586	147.546	150.295	151.616	162.743	171.261
6	113378115	113390449	+	Arpc4	protein_coding	Arpc4	ensembl_havana	13	123.171	164.506	147.645	150.381	165.655	160.631	147.447	117.949	147.907	103.267	110.148	128.795
1	152766542	152775598	+	Arpc5	protein_coding	Arpc5	ensembl_havana	13	397.209	479.902	479.556	305.39	272.538	311.964	214.949	179.459	222.383	157.93	205.904	235.615
2	39005348	39015878	+	Arpc5l	protein_coding	Arpc5l	ensembl_havana	14	7.76552	12.2666	14.3679	25.5397	29.0041	30.893	32.916	41.319	38.1963	34.0738	45.0189	29.462
7	79925361	79935360	-	Arpin	protein_coding	Arpin	ensembl_havana	5	0.0001	0.110113	0.0001	0.383743	0.0001	0.0001	0.27624	0.0001	0.0001	0.0744945	0.0563735	0.63675
9	75037614	75060314	+	Arpp19	protein_coding	Arpp19	ensembl_havana	13	27.9117	28.8785	33.4501	26.1426	25.6719	41.0227	43.7408	38.3918	42.3242	40.6195	43.0493	37.4467
7	99535466	99606772	+	Arrb1	protein_coding	Arrb1	ensembl_havana	15	193.11	180.312	161.02	281.647	282.057	275.188	102.613	91.026	101.857	82.206	89.9251	212.296
11	70432635	70440829	+	Arrb2	protein_coding	Arrb2	ensembl_havana	15	914.197	830.711	634.865	77.3861	87.2	135.157	50.6995	51.7895	76.2929	58.623	50.9277	78.8288
2	24925352	24935253	-	Arrdc1	protein_coding	Arrdc1	ensembl_havana	15	79.9989	60.1774	39.9044	65.3288	70.6327	48.0184	43.7407	35.0706	32.2778	41.0659	40.0105	47.2857
8	70835129	70839721	-	Arrdc2	protein_coding	Arrdc2	ensembl_havana	11	2.85719	1.48528	1.57158	15.4006	14.7837	10.2977	10.0516	10.0765	6.86346	11.0849	9.34151	8.16078
13	80883384	80896043	+	Arrdc3	protein_coding	Arrdc3	ensembl_havana	10	9.7435	18.2623	19.9242	20.9908	17.1772	14.9988	7.62156	5.85456	8.00735	4.98453	6.47155	11.2862
7	68736995	68749242	-	Arrdc4	protein_coding	Arrdc4	ensembl_havana	15	29.6699	40.5949	43.9453	60.5607	59.51	67.4945	31.4801	30.1168	31.0345	30.4275	41.8113	67.0799
15	89472476	89477426	-	Arsa	protein_coding	Arsa	ensembl_havana	14	11.3516	9.69575	12.8304	35.985	33.6894	29.7487	33.8319	34.1802	29.4809	38.5159	26.4632	33.5109
13	93771630	93943017	+	Arsb	protein_coding	Arsb	ensembl_havana	7	80.7439	55.964	115.722	30.9291	35.0809	108.116	67.4877	66.7439	183.182	37.0265	24.9868	52.9513
11	109473374	109573331	+	Arsg	protein_coding	Arsg	ensembl_havana	13	32.0874	37.4047	29.7461	39.7347	44.8203	32.5721	26.2886	23.5304	25.9117	15.5485	18.8518	28.4757
18	60911780	60918562	+	Arsi	protein_coding	Arsi	ensembl_havana	5	0.0001	0.110113	0.0001	0.328937	0.328624	0.279927	0.165784	0.0001	0.0498345	0.0001	0.225194	1.38915
13	76060422	76098661	-	Arsk	protein_coding	Arsk	ensembl_havana	17	4.02933	5.33574	5.83702	25.3753	25.2964	22.3862	18.9433	18.0138	17.8051	18.8219	22.9597	25.4082
7	101552453	101560866	-	Art2a-ps	polymorphic_pseudogene	Art2a-ps	havana	1	0.0001	0.0001	0.0001	0.631833	1.07954	0.391858	0.0001	0.0563928	0.0001	0.0001	0.0563735	0.0001
7	101576970	101585601	-	Art2b	protein_coding	Art2b	ensembl_havana	5	0.0001	0.110113	0.0001	0.190458	0.23476	0.0001	0.0001	0.0001	0.0001	0.0001	0.0001	0.0001
5	92331827	92414629	+	Art3	protein_coding	Art3	ensembl_havana	16	0.0001	0.114164	0.617467	0.109712	0.328624	0.0001	0.055328	0.112686	0.199038	0.0001	0.0001	0.0001
6	136848451	136857734	-	Art4	protein_coding	Art4	ensembl_havana	2	0.0001	0.110113	0.280721	0.0549061	0.140896	0.0001	0.0001	0.0563928	0.0001	0.297678	0.112647	0.231609
7	102096879	102109490	-	Art5	protein_coding	Art5	ensembl_havana	12	0.0001	0.0001	0.0001	0.274131	0.140896	0.223962	0.883748	0.0563928	0.0498345	0.967229	0.337741	0.0001
8	124722139	124734124	+	Arv1	protein_coding	Arv1	ensembl_havana	5	0.659428	1.98034	1.12258	5.15187	2.67522	2.85434	6.24087	5.5168	5.42116	4.91014	4.27689	3.87787
16	18348182	18407077	+	Arvcf	protein_coding	Arvcf	ensembl_havana	16	0.586185	1.37638	0.168473	2.96808	2.96479	3.43476	1.54857	1.4659	1.39848	3.96069	1.24126	2.61001
19	46707443	46741096	+	As3mt	protein_coding	As3mt	ensembl	7	1.39202	2.4754	3.9288	10.7421	11.78	11.0812	20.5449	18.6893	21.5352	15.9949	18.7392	17.1896
8	41340197	41374774	-	Asah1	protein_coding	Asah1	ensembl_havana	14	49.9626	59.1872	60.8388	238.518	246.301	243.451	113.218	108.983	112.35	96.1923	135.957	205.058
19	31984654	32061470	-	Asah2	protein_coding	Asah2	ensembl	9	8.27833	16.007	13.6944	11.5642	13.6104	14.775	17.8387	23.0239	18.8992	14.2095	21.6091	17.1318
15	64086857	64382920	-	Asap1	protein_coding	Asap1	ensembl_havana	16	219.042	197.474	208.671	222.352	230.063	195.541	146.796	143.21	158.107	136.589	130.048	168.017
12	20990459	21270172	+	Asap2	protein_coding	Asap2	ensembl_havana	16	3.03485	3.4	3.72307	6.71197	6.38415	7.66021	6.38347	5.73409	6.17724	6.25628	8.62513	10.102
1	91540544	91559590	+	Asb1	protein_coding	Asb1	ensembl_havana	16	19.1939	13.8618	12.9087	15.9487	16.9895	13.8795	27.4485	18.9708	18.8495	15.9949	18.1765	15.9742
X	164436994	164459171	+	Asb11	protein_coding	Asb11	ensembl_havana	14	0.366393	0.0001	0.0001	0.0549061	0.093964	0.167996	0.055328	0.0563928	0.149304	0.148889	0.0001	0.0001
13	3634032	3653823	+	Asb13	protein_coding	Asb13	ensembl_havana	7	0.293135	0.990218	0.785839	16.2775	13.6573	15.9502	18.9433	14.5237	13.7268	17.706	17.9514	19.3311
14	26894557	26915259	+	Asb14	protein_coding	Asb14	ensembl_havana	14	0.0001	0.715185	0.280721	1.15103	0.187828	0.0001	0.55238	0.281564	0.248773	0.372073	0.337741	0.115854
11	102268743	102279463	+	Asb16	protein_coding	Asb16	ensembl_havana	4	0.0001	0.0001	0.0001	0.0549061	0.047032	0.0001	0.331468	0.39415	0.0498345	0.223284	0.731656	0.0579772
12	103321142	103356002	-	Asb2	protein_coding	Asb2	ensembl_havana	14	0.0733587	0.770192	0.0562242	0.0001	0.328624	0.335892	0.055328	0.0001	0.0001	0.0001	0.0001	0.0001
11	30885416	31102705	+	Asb3	protein_coding	Asb3	ensembl_havana	13	6.08057	11.3315	9.87797	9.26234	9.33957	7.66736	11.3771	10.358	11.0909	10.7129	11.6487	10.0707
8	54529580	54587843	+	Asb5	protein_coding	Asb5	ensembl_havana	3	0.0733587	0.0001	0.0001	0.21997	0.141995	0.233862	0.166754	0.451744	0.353732	0.449065	0.337932	0.0001
2	30823097	30830334	-	Asb6	protein_coding	Asb6	ensembl_havana	10	17.2891	13.3667	11.1688	20.0043	16.9895	17.8531	20.2688	16.4939	18.7997	15.3998	15.6442	14.5273
7	66644565	66689597	-	Asb7	protein_coding	Asb7	ensembl_havana	17	53.6986	60.1774	53.7672	18.0861	15.8162	16.1741	19.0538	17.7324	20.1924	18.2267	21.6654	22.9195
15	98134637	98165626	-	Asb8	protein_coding	Asb8	ensembl_havana	13	19.4137	19.9675	13.6383	24.9917	26.1413	22.1624	30.983	26.2326	29.2938	24.1039	24.4791	22.9774
10	60002805	60099989	+	Ascc1	protein_coding	Ascc1	ensembl_havana	14	4.39562	5.33573	6.51051	17.264	18.8198	15.4466	25.2394	22.0106	20.2421	18.8964	22.7909	21.241
11	4637747	4685700	+	Ascc2	protein_coding	Ascc2	ensembl_havana	16	47.838	41.7502	41.1392	53.7101	58.0078	56.0775	76.988	74.363	73.9554	74.0227	70.4546	67.4271
10	50592669	50851486	+	Ascc3	protein_coding	Ascc3	ensembl_havana	9	40.4389	52.2013	57.4713	61.0539	54.629	67.1027	73.1772	66.4256	79.1279	57.6558	73.4933	77.4978
7	142966829	142969265	-	Ascl2	protein_coding	Ascl2	ensembl_havana	6	2.1246	1.59529	1.68383	1.26064	0.422488	0.391858	3.03764	2.64586	3.03391	0.967229	1.0693	0.578872
7	109727465	109731727	-	Ascl3	protein_coding	Ascl3	ensembl_havana	2	0.0001	0.0001	0.168473	0.0001	0.0001	0.0001	0.055328	0.0001	0.0001	0.0001	0.0563735	0.405241
[truncated: 18,204 more rows]
