# Supplementary material for: Molecular Mechanisms in Murine Syngeneic Leukemia Stem Cells
Source: Cancers (Basel). 2023 Jan 24;15(3):720. doi: 10.3390/cancers15030720 (PMC9913241; doi:10.3390/cancers15030720)
Supplement: Supplementary file 1 [file cancers-15-00720-s001.zip › Supplementary table S2. list of 470 DE Genes.xlsx]

## Sheet: גיליון1
Table S2. List of 470 DE Genes.
Gene Symbol	P9 #1	P9 #2	P9 #3	P10 #1	P10 #2	P10 #3	P11 #1	P11 #2	P11 #3	P12 #1	P12 #2	P12 #3
Epor	0.293135	0.0001	0.0001	0.0001	0.0001	0.0001	0.165784	0.168979	0.0001	0.0001	0.0563736	0.0001
Ephb2	0.146617	0.220126	0.0562243	0.274131	0.093964	0.0001	2.98241	2.81474	0.199038	2.60391	2.25104	0.115855
Clcn2	0.293135	0.550166	0.505218	2.74041	1.97233	1.45522	3.83851	2.13923	1.84028	1.0428	3.17807	2.08368
Bmyc	0.366394	0.23955	0.168473	5.80955	6.80524	6.71595	11.3358	12.4408	8.00736	16.8133	8.83505	7.35052
Mrpl14	5.78754	6.65591	6.84726	6.3028	5.91353	12.4804	7.06929	6.4175	8.90258	7.96033	5.121	6.71386
Fancl	2.61465	1.84848	2.08006	9.68688	8.16241	7.72029	13.6512	9.71434	9.04166	12.3927	12.6795	11.2582
Mrpl41	7.91204	6.32586	5.94927	5.26149	6.0074	6.26823	11.9294	13.0038	14.0252	8.4811	9.22897	8.79745
Mtcp1	5.7888	5.59938	9.69015	13.3006	7.52134	6.40003	13.8189	11.2916	10.8005	13.6895	17.1422	10.9507
Mrpl3	5.93406	5.57567	6.90338	19.5661	17.1159	15.6557	31.8131	27.3876	30.1086	24.8479	28.9717	18.8102
Ercc2	9.3438	8.609	5.32794	21.3526	21.2062	19.1167	37.3686	26.5194	29.4523	31.176	26.0349	22.3686
Dusp1	74.4307	65.7331	36.3125	23.4023	22.1051	21.7707	2.81673	2.58957	2.28789	5.35652	1.96968	4.10939
Akirin2	11.868	11.9915	20.7661	22.7995	17.1303	25.0726	27.8351	24.4875	33.6207	24.5504	26.1111	25.8712
Mrps2	3.29674	4.62065	5.5564	21.813	23.7947	22.5542	43.7405	45.8223	46.353	43.1493	37.8158	33.3952
Psmc2	30.842	38.5597	43.1596	35.6241	40.2208	50.369	60.4748	57.4751	73.4581	52.5972	66.5155	56.4305
Nudc	15.1304	14.9619	20.3381	32.2854	42.5205	43.7817	94.6978	102.7	120.329	84.4025	70.3506	58.7677
Ranbp1	11.1354	9.24122	16.7812	22.9092	29.2802	45.6118	102.22	114.831	107.37	95.0555	90.7493	57.7037
Fcnb	179.996	162.268	236.566	12.0575	15.91	71.0203	1.60171	2.08294	12.2845	2.23194	1.63203	7.06114
Wdhd1	13.9995	12.7616	30.5863	29.8849	29.7087	42.0818	109.116	103.357	101.453	66.735	101.032	66.8482
Aoah	86.9583	79.1546	85.0283	79.4143	79.4561	97.7718	28.4426	29.7791	39.3401	22.1697	24.254	58.4562
Cln3	107.96	102.896	89.9385	66.8957	63.9857	62.8857	34.9486	31.0647	31.2493	37.759	28.9636	53.4297
Pilrb2	180.415	167.97	165.207	46.5169	37.3847	62.9591	3.51549	6.28237	9.25933	5.38586	4.99982	22.561
Bcl6	167.031	129.706	112.586	55.4092	66.5496	66.7109	13.9728	13.4541	22.2812	19.1939	14.2373	33.5689
Acpp	134.064	160.73	131.443	54.861	61.0588	52.048	19.6061	22.5735	24.8177	21.1282	18.0639	14.3537
Ints7	12.7471	10.8364	15.771	47.0785	46.4158	41.4704	114.867	98.7944	95.59	86.2977	82.1031	63.7232
Rgs14	107.398	98.902	86.2624	66.6986	63.6867	67.3266	34.7938	29.2724	34.9635	36.5279	31.232	59.4974
Slc11a1	65.933	58.5271	62.6906	140.139	153.936	139.858	9.22318	10.0765	10.9914	10.7129	10.2419	44.7971
Fmo5	205.491	187.74	176.736	26.8551	22.3397	38.8962	7.89771	8.44403	18.004	4.38939	8.60996	13.254
Dhrs7	174.648	182.074	144.467	21.6485	30.3653	28.5425	27.1171	22.5172	24.1214	20.7562	21.6655	24.5401
Mirt1	128.349	150.883	96.8705	46.2565	45.8527	28.7104	38.4388	40.0806	20.8886	47.6127	47.3825	34.1477
Lmtk2	157.799	147.638	171.235	31.13	28.6286	41.1347	25.0184	20.7722	29.2938	16.4413	21.5529	34.8422
Plaur	165.787	163.533	129.029	60.3416	66.0804	55.1261	10.88	10.752	12.2348	13.7631	11.1985	29.8068
Nop58	5.42125	7.37099	11.1127	25.4302	22.9499	35.5941	110.898	118.947	129.658	92.3983	103.994	65.17
Nt5dc2	4.77916	2.42039	2.75931	74.0477	74.6881	59.8141	113.174	84.7391	103.91	75.6102	59.6833	74.8069
Rad50	13.1134	15.457	23.6846	41.1048	39.4231	46.5631	90.1327	102.454	106.98	84.5124	99.7163	68.7003
Ppid	14.5786	21.1719	28.2867	49.8008	45.7684	43.0935	98.1509	104.513	103.177	70.8444	95.0205	58.6255
Cd300ld	149.429	119.241	136.197	67.7912	71.1667	109.924	7.47221	9.59055	9.29639	17.8505	11.0026	24.8873
Zfand3	108.13	110.124	138.515	60.4512	65.0945	68.9498	30.3756	28.8221	29.7414	28.1957	29.6563	40.9772
Amd1	15.4282	20.2503	27.4588	69.691	63.4203	55.8334	116.385	90.3605	96.8924	38.2643	81.8379	67.1902
Cluh	4.90843	4.23561	7.35238	61.0538	58.3368	43.8771	131.662	105.832	97.9281	83.9177	79.4026	66.7907
Igfbp4	10.2563	7.53601	21.4395	20.6072	22.3867	36.7694	125.921	118.272	161.737	83.9916	80.584	57.7037
Ano10	184.833	187.188	149.909	28.8281	30.1306	39.2879	22.7541	21.7855	23.8727	18.6732	22.3407	21.3568
Atm	4.90843	7.92105	10.4953	45.544	42.0043	48.4662	114.654	102.059	114.986	72.6093	108.046	79.8129
Arhgap25	128.204	125.689	128.693	47.6266	53.2211	54.7906	30.3755	31.1301	36.7044	38.9086	36.4653	40.1669
Arl8a	99.9257	78.4945	69.4816	69.0008	81.3805	81.1494	29.271	38.0541	37.8481	66.8812	36.5218	65.2861
Heatr1	12.5079	10.8921	16.5007	59.3778	53.9636	60.7757	113.018	91.7298	102.427	60.5673	93.5863	80.2056
Rhbdf2	160.659	122.17	103.774	65.0549	61.4814	68.4459	27.5036	22.0669	23.2261	29.8323	23.4662	50.4114
Sh3bp2	73.1122	66.5576	63.6453	96.3502	108.274	101.746	37.8314	34.5638	32.4769	37.5694	40.9674	67.08
Shmt2	6.59338	6.16084	5.83702	28.9925	34.2137	31.5646	148.122	123.337	127.519	103.632	85.8117	63.3757
Rab11fip1	161.095	163.645	155.369	44.2285	49.052	47.7572	20.4345	21.4477	25.5636	27.8236	20.7309	28.1864
Xpot	18.2234	22.2159	27.7501	53.4886	52.9088	56.7047	111.358	94.3152	110.472	69.0961	84.0741	67.8321
Ptafr	114.723	120.41	103.156	90.3206	78.9397	87.1383	26.9514	20.4907	20.1426	30.2043	28.1932	51.8582
Evi2a	69.4573	74.3676	79.3061	102.062	105.964	140.297	21.996	23.2833	23.6514	26.8441	27.9543	78.2689
Zfp568	18.5346	22.2778	30.7	48.668	51.344	44.6604	119.79	106.338	104.691	72.6094	91.951	62.3338
Xpo4	12.5273	21.6117	26.9371	55.4064	53.364	52.6166	119.761	97.0925	103.037	66.36	94.2262	72.1339
Slc1a5	17.9485	12.5416	20.2609	64.2877	63.8279	54.3425	120.122	98.85	95.4409	79.8257	80.5279	68.1219
Gbp3	2.48295	4.75793	3.04914	56.7082	58.6454	63.2119	103.664	112.327	100.27	83.4836	107.279	85.9766
Rara	68.7168	57.0965	52.5886	119.367	122.445	104.096	35.4012	33.4944	27.3043	57.1352	38.6601	65.8065
Gcnt2	137.499	126.752	105.654	90.5742	88.1959	96.9638	17.5812	17.4267	21.8341	21.4853	18.992	40.4546
Nup188	26.3732	24.9181	28.7918	49.1199	47.4378	51.9118	122.82	92.8071	103.4	81.9064	78.8369	75.6784
Gm4737	4.32236	4.90651	10.5701	22.2002	31.9983	40.3692	124.329	128.905	117.492	110.001	120.766	69.1272
Cdk2ap2	136.262	121.125	118.703	62.7529	75.5139	86.9149	29.6576	25.6134	36.1073	28.3444	19.9772	44.3343
Stx11	177.872	171.733	183.298	39.0221	41.488	44.9406	19.5508	17.9012	18.6506	20.3099	20.0335	32.4113
Klhl18	177.358	148.792	96.0278	39.7893	43.6938	47.0671	33.4683	36.6467	34.317	48.7285	38.8287	43.4661
Srsf7	12.6006	16.9421	28.5112	43.6806	40.2208	56.5252	110.677	99.4697	124.287	77.445	90.4879	89.4205
Dgat1	179.631	182.898	163.883	38.0356	38.6721	39.2319	27.5589	21.5603	26.1605	20.533	20.9902	31.8326
Dkc1	5.64102	5.55577	9.20448	30.2531	28.0655	31.9004	118.188	128.723	129.757	126.392	115.811	62.2761
Antxr2	168.714	191.039	193.795	30.1434	36.3254	46.8432	18.2254	17.3383	20.8886	19.6403	19.5833	29.8648
Lats2	112.012	107.649	93.7296	79.4691	75.2644	89.2643	36.6164	32.7627	36.9528	40.6939	38.8289	51.4528
Il13ra1	52.0871	66.2831	62.9715	159.65	139.717	120.046	28.9948	24.206	18.7003	27.0798	34.2144	64.186
Cd9	223.436	300.996	252.177	1.26064	1.59579	8.45088	1.32557	1.29484	1.69108	3.49665	2.36359	1.15765
Gart	13.4218	17.5982	19.2902	36.7663	42.3913	46.3156	142.979	120.264	124.87	84.5069	89.6107	64.6985
Slc27a4	235.673	209.466	134.305	26.307	32.0547	31.9564	25.3498	18.633	25.9118	19.3427	18.4016	25.5819
Sh3bp5	135.602	114.358	124.876	83.6893	83.6788	86.019	21.9809	22.2921	15.6665	39.9501	28.0243	48.0386
Hmox1	39.8528	40.32	48.4917	128.574	138.777	159.446	29.4919	30.0042	29.244	39.2061	39.054	81.8387
Dtx4	35.8969	34.9293	48.0986	39.9538	38.8129	52.9994	111.45	90.9131	143.086	69.1128	72.9869	68.0638
Gsto1	3.66304	4.40063	6.67889	75.0847	83.6324	72.5309	109.24	105.718	111.604	92.3987	78.7263	71.9998
March1	18.6811	16.1721	26.1536	181.792	163.277	177.635	25.1841	30.5108	22.0325	27.6749	34.7771	93.5301
Ramp1	21.9777	22.2228	26.154	54.587	60.5424	53.0553	121.723	94.2907	113.146	88.3066	80.3588	81.6649
Aldh3b1	140.338	118.321	92.5002	74.6228	85.3809	80.8286	30.9278	28.8192	37.3386	39.2768	27.8555	62.0416
Noc2l	8.16155	6.35103	7.80136	55.4751	64.0717	55.6359	129.241	118.638	115.449	94.2697	93.3421	73.4747
Ndel1	145.565	144.228	132.565	54.258	60.4953	61.0025	34.9042	32.7062	35.3614	39.5781	38.2098	45.4337
Ilf3	14.5053	19.6691	25.0895	39.7628	38.5707	49.9123	128.594	111.927	111.308	93.1649	108.084	86.2528
Rpl10a	1.50685	8.02392	7.62063	82.1932	87.318	48.3706	132.047	110.454	105.192	114.613	72.8754	57.7725
Hells	6.22709	9.35122	22.113	26.9647	27.5023	40.7429	123.325	131.67	128.166	97.8289	146.649	70.4947
Rab43	145.392	96.4893	110.259	99.3729	108.883	81.5593	42.5799	33.3232	31.1056	24.5032	20.6307	37.0677
Sfxn1	17.0694	20.4076	33.843	35.4597	41.1126	42.4779	122.109	115.907	132.543	121.04	93.0765	56.5462
Timp2	260.656	236.749	206.033	23.4023	24.9679	45.9477	4.36312	4.44724	7.01267	5.6541	4.72708	11.1125
Kif15	23.7359	22.4978	47.8178	34.9664	30.5059	41.8063	114.101	121.255	117.97	82.3553	116.936	84.0377
Pabpc4	12.5829	12.4069	16.7679	44.1948	52.9432	43.7448	141.371	128.892	131.186	95.2038	102.347	57.3365
Mapk13	275.233	293.842	225.731	4.00095	7.65002	24.9607	1.65694	1.68889	4.67515	0.818442	0.956751	1.21552
Dopey2	148.861	123.241	99.3097	74.834	78.4862	74.509	34.652	32.1692	32.2125	47.5545	35.9987	64.0381
Ncapg2	18.6811	29.7037	50.1752	41.1595	41.7696	58.484	120.232	111.087	115.932	72.3117	100.28	88.784
Dennd1c	163.807	157.154	106.187	76.7287	71.3837	61.0024	30.4308	33.9447	23.624	40.8428	39.5042	49.4852
Ulbp1	22.1321	18.5193	39.5459	35.0373	33.4386	47.5803	123.616	117.756	115.668	88.5126	129.355	86.2281
Fkbp4	6.22709	8.30609	17.6792	39.5699	49.4191	59.5476	125.645	125.533	166.759	95.5233	90.4315	78.0765
Klf7	147.102	159.726	145.25	58.1734	57.7948	67.4421	36.1182	31.6367	42.0256	43.2234	32.4469	41.9577
Zdhhc18	205.491	173.986	176.287	26.4167	28.7225	48.4102	36.2297	31.8619	42.9708	32.7338	27.6867	35.9998
Abhd5	127.341	151.068	241.888	43.9847	40.6031	83.7953	27.0074	22.7787	52.4346	14.5071	23.3824	38.3727
Numb	179.921	178.293	153.036	44.0643	41.787	46.6193	35.6669	34.4512	38.445	38.7471	36.8593	39.5882
Trem1	236.626	231.966	214.335	34.8021	34.9644	47.1793	9.94114	8.89437	15.766	8.70428	9.96052	15.5691
Gm45837	228.33	187.021	151.133	46.4287	59.4804	68.3087	17.2652	14.0826	41.0371	14.43	5.82665	39.1222
Cd300lf	207.475	214.034	161.236	85.7683	83.7542	62.7619	9.19816	9.49295	5.18839	9.82453	7.06138	19.492
Gm6169	271.193	231.296	176.812	18.2888	14.3768	40.2249	12.9165	17.4866	9.63526	51.9515	16.1568	21.0138
Prkdc	8.13182	12.9266	24.2458	65.4386	63.546	57.3647	129.123	112.135	116.379	83.2478	119.863	90.2306
Pole	15.8972	13.8068	20.1487	32.3889	37.9166	46.2835	159.389	140.901	134.482	97.8288	107.257	76.7454
H2afx	38.3144	30.2537	40.6341	32.8838	39.6107	57.3647	120.618	115.851	129.36	130.34	75.1816	79.2341
Rhou	190.033	188.123	210.129	61.7666	58.3835	74.0983	12.5369	12.3845	27.3044	14.0607	8.72251	32.9902
Gm36161	52.253	48.6656	88.9957	121.406	115.742	179.007	23.6514	32.295	60.6945	36.5956	25.0534	106.913
Kars	22.7103	22.7729	22.7305	50.9701	63.6873	53.0556	136.578	117.031	129.013	100.136	98.4784	80.8543
Scd2	20.8056	20.8387	29.9639	42.9549	42.8464	43.0375	135.798	128.121	133.04	105.789	121.321	76.1087
Nolc1	13.4797	12.8716	23.4039	41.9814	40.9249	49.3058	141.714	146.642	149.352	111.963	100.843	69.0479
Gm9531	7.84137	13.578	23.3915	29.7413	29.8975	42.4025	119.34	159.999	165.207	101.924	134.024	74.9983
Pfkfb4	211.349	206.602	174.998	63.4108	69.5538	69.1732	17.6731	13.6793	20.4907	20.3842	15.0814	32.585
Zfp704	12.8936	14.3018	26.8181	64.6036	59.9466	64.808	134.078	120.056	129.565	92.4999	108.131	87.3948
Slc4a8	2.63741	1.92533	2.0767	49.0514	52.5639	37.7767	149.888	134.146	97.4808	152.063	158.016	77.7875
Cpeb4	114.503	145.273	172.806	63.4658	65.2827	79.5266	39.4331	37.6039	52.3706	41.5869	47.3261	57.3564
Nup155	21.6847	23.5429	37.0422	55.5189	52.3293	60.7783	139.727	118.328	123.591	79.7516	112.265	93.5882
Pitpnm1	173.33	138.232	118.142	116.299	111.605	88.8732	28.4978	22.7987	34.1678	26.0382	17.3324	43.1187
Nsun2	15.9705	13.1459	17.9014	60.2832	60.4472	54.4546	133.763	131.723	133.931	100.805	117.099	82.0085
Tlr7	40.1461	51.0462	49.6139	167.82	151.401	193.136	26.2886	30.6233	33.2229	43.6697	42.374	98.1588
Lilra6	157.017	140.566	86.5883	127.8	119.946	107.187	17.7216	23.1577	14.8171	33.9061	29.3207	73.4859
Gas5	6.22709	10.5753	16.4006	58.6904	60.4057	77.3319	122.938	133.347	133.324	121.813	112.031	78.8035
Cbx3	15.1283	31.7047	49.6285	59.8165	48.5969	52.6577	131.468	122.49	133.966	78.3843	124.27	87.2357
Dgkh	178.964	216.031	244.703	45.2668	40.6431	57.4207	25.9002	22.2358	43.0702	14.1351	20.7088	27.545
Ltb4r1	198.018	200.829	130.489	83.4698	93.3479	67.1026	37.0581	22.9676	44.5125	13.7631	13.5058	31.7169
Impdh2	8.39813	14.0102	12.0699	44.4936	46.2204	51.4584	162.863	142.501	140.113	129.76	112.687	74.271
Unc13d	190.619	165.239	129.479	69.6035	65.1417	67.3827	49.3742	36.0838	44.8607	33.6265	39.3915	50.006
Acvrl1	335.385	287.404	222.53	16.0035	19.9462	19.7	5.79905	4.84129	3.08364	6.62123	7.82213	12.5595
Plxnc1	289.855	280.133	236.168	19.8947	19.148	32.291	8.44999	9.28743	8.00736	11.9776	11.5857	17.4212
Mmp25	360.36	303.197	270.238	0.98661	2.4875	5.20488	0.0553281	0.337857	0.0001	0.669652	0.619109	0.173732
Ipcef1	238.018	247.035	297.627	36.6106	35.1047	47.5147	5.08108	5.5731	7.75869	3.71983	6.92175	18.1157
Plekhg3	126.518	126.57	123.719	93.2804	85.8852	90.1604	46.944	41.7694	38.2956	46.5713	48.4485	91.2152
Lig1	18.3148	21.2326	44.3383	33.5414	37.0764	55.5363	151.601	147.825	139.853	115.312	115.98	82.07
Srp68	25.2744	28.9337	33.5062	57.1078	66.5972	65.3677	126.803	122.379	144.829	106.086	104.558	81.8961
Sept5	349.266	303.139	275.466	2.46638	2.84491	25.4142	0.718065	0.337857	4.77462	0.595258	0.394015	0.173732
Arap3	285.343	240.984	234.712	21.1005	25.578	37.2171	21.3734	22.461	27.3044	20.2355	17.1635	19.852
Cad	7.17946	6.21585	10.8321	47.2429	49.7478	42.9814	204.729	153.736	163.179	111.667	100.674	76.514
Hltf	34.6907	46.7558	59.3713	98.7608	83.3039	103.916	76.7704	80.2147	99.6192	80.4208	100.954	111.6
Cct3	16.0438	13.9718	20.7661	52.5592	61.5753	54.9578	157.29	151.428	138.013	92.6959	130.611	86.874
Pik3cb	183.474	182.639	195.071	44.9702	45.9043	69.9465	43.2099	40.4474	55.7597	36.8773	43.5409	47.0658
Qser1	12.6739	10.2313	25.5366	48.5583	50.1235	62.7933	137.463	143.322	153.68	103.558	135.394	113.034
Map4k2	233.934	220.907	179.838	49.332	53.0333	56.5337	33.5715	31.1083	36.6828	32.091	35.2917	35.0132
Rpl14-ps1	6.1695	16.0562	22.3639	44.0935	82.0367	93.615	82.4688	142.258	187.08	64.4747	134.206	123.432
Gm11518	10.9267	27.9442	26.0949	84.2271	136.714	60.1125	134.136	128.222	155.088	21.7281	110.744	103.24
Ifi204	20.4751	17.3241	34.3858	165.992	158.883	272.796	28.3636	39.0886	41.2931	44.9609	43.3625	137.796
Bcl2	1.9709	6.60089	4.49004	42.4182	37.4974	41.7123	152.523	139.636	118.711	177.31	193.634	88.6653
Prpf19	21.2451	17.7122	19.0221	68.2776	72.9233	65.5358	155.025	127.595	133.322	119.9	113.723	91.7091
Clec4e	135.381	148.464	174.659	111.859	111.651	107.341	41.642	33.3255	31.9296	27.7493	39.4478	44.1027
Ptges3	16.9991	25.788	49.1205	53.1119	52.2566	76.8408	137.8	119.464	156.041	110.658	118.443	94.5761
Eftud2	27.9116	24.423	30.1919	67.8975	73.3273	70.1728	144.55	131.286	130.027	103.55	116.928	92.2081
Klra2	45.5671	63.0373	61.905	264.987	246.633	221.843	9.99638	14.8614	13.6771	11.9033	9.22897	50.3534
Pi16	226.077	209.467	184.257	94.8692	100.858	78.408	17.8388	17.0568	25.6631	13.168	12.7742	42.077
Clasp1	97.361	107.703	114.55	72.8923	69.131	75.2177	84.8304	81.3434	88.2293	61.1525	76.9262	94.7453
Ezh2	20.2928	24.1451	47.0839	45.423	38.2443	66.6998	134.41	133.904	156.804	109.875	140.791	106.712
Lman1	21.1719	17.4922	28.9602	71.6318	68.8962	69.845	139.562	133.189	157.808	97.0113	122.395	97.0022
Gca	228.726	265.299	324.683	23.4358	20.8037	57.3836	17.5547	15.588	38.1556	11.4087	12.8571	11.614
Trp53	23.5161	17.4922	17.2303	63.301	77.8602	71.5237	148.619	127.953	141.446	139.715	100.392	102.386
Uba52	14.2746	21.6882	32.2458	63.0975	140.092	77.5882	113.362	132.248	182.6	36.4475	115.358	108.616
Rps23-ps1	13.4653	22.5212	32.9547	41.0144	99.5173	178.424	76.223	122.98	236.408	45.374	69.65	103.293
Nop56	5.42125	8.90306	9.51237	52.9254	58.7805	46.459	174.457	175.117	158.09	130.925	139.154	85.0801
Crispld2	366.884	341.271	277.314	15.8391	16.0508	12.6483	2.81673	1.97035	1.54187	6.10047	1.9134	2.60458
Lmo4	185.198	212.875	201.541	52.9977	63.3111	66.0397	41.2003	43.627	51.9726	55.2008	36.0714	39.9355
Acap1	222.119	219.64	210.69	27.6771	27.8777	46.5633	58.7075	45.7661	47.2977	47.2408	54.8104	42.5399
Mdn1	15.0914	19.1424	29.1847	50.4766	49.7951	52.552	173.029	156.158	170.289	107.425	134.553	94.8603
Pnkp	226.81	189.718	187.062	69.3846	70.2103	69.901	44.7901	36.1964	48.4913	30.5763	32.5825	50.3534
Chil1	380.726	359.57	288.535	2.08273	5.11569	20.2596	1.15989	1.01337	0.895322	0.372073	1.12557	0.520996
Mcemp1	177.579	208.365	252.896	94.0474	104.752	97.324	17.3969	17.7324	28.1001	14.6559	16.9384	42.3084
Gpcpd1	137.8	187.628	138.571	134.604	120.569	73.0909	47.7723	47.6238	34.9635	44.86	56.0487	49.9482
Bub1b	26.5198	30.5288	61.4562	48.7227	48.3401	63.5208	148.398	140.507	159.1	117.767	140.234	119.864
Gspt1	25.1677	21.9215	37.5195	65.5227	64.2353	81.4593	149.669	145.017	159.836	114.075	141.575	102.746
Slc16a3	247.394	222.451	162.927	89.8268	84.8533	80.5907	40.8138	36.5342	32.0789	36.8998	32.2449	50.2374
Clec4a2	178.093	209.723	262.259	103.883	104.214	134.679	12.5765	13.006	48.9886	9.96899	6.7466	33.3767
Hmgb1	26.2842	29.7373	43.3817	59.7858	53.8548	77.8917	157.727	148.999	186.436	91.6986	142.474	99.5255
E2f2	149.301	142.357	129.703	131.37	127.327	98.7791	48.6008	38.1104	32.1286	61.4501	47.9452	111.414
Fpr2	271.199	290.545	298.076	85.4976	82.8819	72.7553	1.54649	1.68889	2.23816	4.53818	2.81378	12.791
Hck	162.636	149.73	136.491	132.794	147.788	162.356	29.2157	27.1896	26.9064	39.5037	35.6214	78.4235
Nup205	12.4541	20.2425	31.7664	58.0948	57.304	63.2412	189.765	155.65	168.55	110.774	142.654	118.765
Slc25a24	160.803	207.815	225.9	65.8771	69.7411	91.2237	40.7032	39.9681	43.2692	52.1508	55.8798	76.2245
Fpr1	334.06	401.163	377.043	3.67211	3.98932	6.10033	1.15989	0.844493	0.199038	0.892836	1.18185	0.231609
Rbbp7	17.8556	25.4827	30.9807	48.9654	51.4833	57.2807	179.365	168.14	180.555	108.277	156.718	105.593
Aplp2	52.4533	60.1773	73.5792	124.081	131.176	131.127	93.9976	84.6649	98.2758	80.421	90.8823	110.256
Ly75	273.242	287.928	273.22	30.8011	31.0691	65.4802	32.9712	29.779	44.8607	14.5071	26.111	24.1928
Myo18b	7.25271	6.38086	23.9651	92.2389	100.2	91.3143	169.109	156.543	218.618	90.9688	88.0683	96.1343
Gm8430	25.4147	22.1018	26.0876	118.382	147.042	100.85	155.808	127.114	185.425	46.0429	90.6473	99.8446
Ehd1	216.846	212.984	201.039	62.1503	67.066	96.0364	47.2754	37.8289	55.5537	44.0418	37.422	67.3116
Ly6g	401.037	433.315	293.359	2.79521	3.33252	9.01053	0.552381	0.281564	0.298521	0.223284	1.51949	0.347364
Ide	25.4209	25.6882	28.1183	71.2484	74.8568	79.2475	153.699	152.273	162.483	130.414	136.576	107.015
Cpne2	276.405	232.293	200.025	40.2825	45.0547	72.7552	40.9239	42.6139	70.4737	42.4051	34.7771	56.1988
Cd300a	58.96	61.7239	72.7151	189.411	194.741	189.667	50.7571	56.1169	49.3274	81.4329	65.1828	98.8608
Tmcc1	208.395	210.122	235.578	99.2103	104.547	94.0167	32.6367	30.8269	38.5312	29.0141	29.3452	58.1088
Ssrp1	28.571	28.3285	47.93	61.4377	66.2682	73.2031	159.443	164.486	163.527	134.43	143.61	105.047
Gtf2i	27.5454	29.7037	38.3329	86.2101	81.7086	83.1087	163.916	145.405	175.911	107.277	130.273	107.363
Mindy1	233.074	231.844	170.519	82.6485	84.4673	69.912	51.6875	44.615	55.9011	40.8082	51.8662	63.9465
Glipr2	222.56	266.953	245.491	94.9789	95.0382	91.2236	24.1348	18.4642	23.4251	23.5833	24.3103	64.1857
Rflnb	339.921	315.628	303.015	28.3897	27.8308	71.1322	17.5074	16.6065	31.3826	17.5572	11.6487	18.463
Naa50	16.9961	30.1437	35.9197	73.2762	69.8348	75.61	182.306	166.122	184.711	104.525	157.565	109.446
Ints1	65.8598	48.7359	36.7614	69.6388	63.1706	65.8713	189.71	143.603	158.305	149.31	114.348	102.732
Zfp36	216.108	151.43	174.816	95.967	109.255	124.293	40.2614	37.4912	33.4167	79.8258	48.4517	97.5613
Abtb1	285.71	252.372	176.737	94.486	102.406	70.6845	43.1333	32.3685	35.9084	37.4206	34.1582	59.0929
Rrm2	35.0178	41.6057	89.9671	48.4486	56.3649	96.3724	173.081	153.904	186.055	100.656	129.758	114.771
Rps19	11.8856	16.2655	20.0008	106.133	130.717	103.242	163.722	150.401	188.899	85.3282	136.78	120.879
Lrrc59	25.1489	24.5196	32.2316	88.1624	91.0155	89.0552	172.764	165.449	181.703	112.057	137.643	117.492
Slfn1	259.28	282.978	305.273	85.9361	85.4271	129.186	6.24087	9.69259	10.9914	8.92746	7.31567	46.5913
Hnrnpa0	39.1935	49.011	50.6242	78.7565	88.1384	89.6007	191.476	147.487	164.572	113.75	123.183	104.469
Cfp	116.189	104.292	111.07	146.662	150.651	186.98	53.2951	44.0774	55.9018	76.7753	58.3559	136.995
Knl1	23.2963	35.7543	78.406	43.6258	39.1881	61.4501	156.683	164.882	189.292	130.415	179.848	139.197
Klf3	135.89	149.452	117.299	168.2	169.045	159.442	39.1568	43.1204	54.5589	59.7391	44.9627	101.864
Ampd3	192.952	174.048	156.704	157.484	156.343	135.301	33.528	35.0426	32.4452	43.673	36.2466	92.4444
Pclaf	18.5346	25.5032	58.0325	45.6536	44.5855	68.7256	204.565	181.43	205.604	122.883	156.37	115.639
Rnf144a	334.419	325.474	320.871	21.7033	27.5962	57.2527	22.4779	20.0967	38.9919	21.8722	20.765	36.0576
Pdia4	25.7872	24.093	28.0622	82.1545	93.4417	91.6155	161.211	150.64	205.503	115.089	143.441	130.282
Rap1gap2	177.728	182.078	161.582	165.461	169.334	148.535	32.5847	25.8948	27.9013	25.5175	33.2014	104.062
Paics	11.575	13.4217	22.1692	66.1751	71.8995	67.5507	201.524	182.606	186.678	140.157	186.041	117.781
Stip1	42.8565	39.7508	58.3751	57.1935	66.2095	97.4923	146.864	168.793	202.921	135.43	145.598	115.823
Tcp11l2	317.211	323.497	244.081	59.4098	65.1419	49.8094	37.8866	27.9214	32.3276	34.2961	43.4997	50.0062
Sh2d3c	300.722	241.053	173.822	82.1542	83.4444	69.1732	54.234	54.3792	47.1979	73.428	48.7332	68.2377
Tmem154	278.017	308.368	256.263	101.337	99.2145	75.3296	33.7444	27.2459	16.4622	27.1542	35.565	42.945
Smarcc1	18.6811	16.7059	34.0675	68.0648	68.5211	80.0691	184.337	186.47	210.363	158.42	162.752	126.741
Pde2a	304.496	284.429	289.746	69.5028	83.5234	100.843	29.0689	24.0047	43.1604	17.5027	20.6369	52.4599
Gpsm3	288.816	268.131	213.214	64.6635	85.8238	98.5686	32.5014	38.67	51.4496	73.2186	40.0404	69.2714
Flnb	22.1975	21.7827	31.7664	65.7126	61.9034	112.994	181.7	151.822	247.628	131.902	128.81	185.092
Ybx3	9.59699	7.64602	12.1791	73.7142	75.5606	87.6422	209.705	206.087	224.954	183.237	145.355	115.118
Cytip	63.0758	83.3901	88.2275	205.195	213.214	220.449	59.1492	59.6142	58.6372	66.4345	81.1466	154.011
Chdh	23.9872	22.5381	26.0195	57.093	56.1267	58.3122	240.018	216.358	219.933	161.153	166.366	109.261
Abce1	15.9249	18.4273	34.4604	73.8755	76.7806	85.8497	191.804	191.382	183.369	165.669	196.874	129.749
Cyp4f18	126.872	131.587	89.3337	219.569	223.332	163.667	66.5597	60.1999	43.2556	59.7342	58.944	125.506
Stmn1	18.0305	20.5498	56.3665	51.6845	52.9629	71.457	231.47	201.798	237.284	123.844	181.697	127.579
Iqsec1	342.08	282.435	208.442	67.4602	74.2624	71.6097	57.3267	51.7525	58.2382	66.3907	54.9116	55.3957
C5ar1	433.857	427.432	362.392	48.2844	55.2393	46.2274	2.98241	1.97035	2.23816	2.90149	1.80085	6.01934
Mcm4	25.8604	26.4032	46.4709	54.9159	60.4955	79.7509	204.18	182.164	219.926	180.11	189.866	122.291
Alox5	441.816	437.581	338.038	27.8963	32.1485	57.3088	8.39476	7.43076	16.0644	5.5797	5.06472	16.8424
Atp2c1	191.205	243.467	247.45	110.494	101.06	106.477	56.8322	57.2556	76.1854	48.6912	71.602	91.6199
Cct6a	26.3	31.2356	38.2206	77.044	80.2018	84.9473	190.698	206.022	216.795	151.32	185.283	116.967
Uhrf1	29.297	27.2413	48.7978	47.0442	48.4751	74.0557	252.822	201.261	219.259	156.236	167.239	133.391
Pacs1	324.243	258.146	219.783	91.0331	94.8966	87.9218	52.4668	48.5809	49.6849	62.8636	47.0448	79.4656
Fgd3	253.84	268.324	251.211	112.079	102.641	108.853	47.9934	42.6702	55.3546	48.2823	47.1009	78.2508
Tbc1d8	335.518	294.523	260.5	79.704	85.5067	95.9554	37.8594	37.1677	41.8834	48.7005	43.577	66.8024
Mybbp1a	16.5849	15.4228	18.7443	89.547	98.1326	75.2735	242.216	220.389	217.031	156.748	173.998	108.98
Parp4	239.556	245	200.694	88.9455	94.4273	87.5152	67.9307	67.4286	65.8486	91.0592	86.2045	100.128
Gm14548	253.157	253.871	162.989	195.259	208.693	115.809	33.8872	31.8636	17.303	41.6592	40.1597	90.5605
Rasgrp4	328.331	284.361	217.175	121.511	133.374	138.064	20.7663	24.2506	23.4238	36.0627	26.8855	93.9052
Capg	272.224	219.913	188.58	126.165	124.041	133.029	56.9956	49.4816	41.23	73.2047	59.0878	112.803
Clec5a	201.318	238.724	345.878	105.665	102.874	160.73	33.0264	39.0674	64.1582	32.0643	38.6038	95.4967
Kdm6b	394.471	280.68	226.026	88.9609	91.9386	94.2874	42.3801	44.7812	35.1512	74.9571	37.3942	49.8377
Parp1	5.8608	6.87593	11.0005	96.6783	103.391	92.1191	232.013	210.535	198.243	172.521	198.476	138.095
Mcm2	25.6406	23.818	44.1138	52.3948	52.1416	81.1499	256.314	213.406	233.304	178.101	188.516	127.156
Mcm3	16.7763	18.2073	34.3482	53.9297	62.748	73.3714	259.517	210.54	235.691	197.521	189.078	134.219
Eprs	31.5013	27.8885	38.5014	85.0048	90.861	86.8577	209.263	207.1	212.261	176.24	205.452	128.429
Hspa9	15.9705	16.5021	25.705	77.1109	88.0915	80.1342	226.435	236.483	228.477	170.066	219.743	120.037
Pilra	293.9	255.408	257.799	141.245	150.106	192.169	19.5398	20.9318	39.8304	25.8599	19.3543	88.9425
Fgr	371.349	334.094	270.02	141.567	147.272	166.612	9.77546	6.41749	14.075	8.62989	6.75293	33.974
Ran	25.5281	35.9741	59.115	76.4006	77.1459	90.297	241.221	206.309	249.849	136.439	188.166	127.696
Rps3a2	8.57252	32.176	48.9923	123.647	179.744	133.384	230.117	154.573	284.99	90.8895	97.9676	133.927
Vars	33.2596	25.3032	34.1236	113.066	110.478	97.7159	264.545	194.83	204.956	165.826	158.692	130.803
Cdk4	13.6796	10.7339	16.5841	82.3024	85.0441	88.2367	238.635	240.768	230.683	215.361	196.223	132.191
Hspd1	14.9663	22.612	36.873	72.6765	72.685	103.258	220.74	246.407	265.077	134.078	228.457	139.588
Pira2	160.699	146.084	91.2684	258.292	231.627	219.688	49.867	58.9482	36.4223	95.8701	80.8871	159.914
Apoe	27.3256	19.2524	27.3327	344.834	395.731	489.859	45.1765	47.5112	36.0079	51.258	37.3094	78.6555
Rab3d	274.727	269.909	254.178	115.04	127.889	135.21	74.447	57.6442	84.8478	61.8218	54.7543	107.361
Trpm2	239.849	216.725	206.033	212.537	216.497	136.836	64.4512	61.7534	53.1165	51.7044	55.0357	113.613
Inpp4a	224.977	224.648	193.741	172.2	170.881	142.151	80.2463	65.0748	59.0849	78.8587	77.2076	147.703
Cnbp	31.2815	42.0253	53.655	116.353	114.09	108.405	252.779	212.675	224.257	159.129	207.765	120.155
Prr13	424.816	377.08	282.538	99.6383	128.028	112.937	31.5353	30.7361	27.7023	45.8273	30.9506	61.3499
Fasn	27.5454	23.9829	20.9345	115.312	122.447	91.4478	275.487	225.853	236.337	198.859	171.466	148.918
Mcm7	20.4977	18.7064	39.9014	60.5813	66.6162	84.8859	287.814	274.023	253.575	197.977	215.89	140.407
Padi4	551.776	478.948	393.541	43.0228	55.8961	73.7065	13.2548	9.40101	16.2136	7.0676	9.22897	18.5208
Ddx21	26.2267	20.3525	40.8024	111.421	108.601	119.318	239.579	229.563	237.532	159.874	223.857	155.863
Ccr1	172.524	189.828	219.558	195.603	192.562	235.559	55.6148	55.2797	49.0384	75.8083	82.6097	151.87
Pcna	34.7684	32.4476	67.2909	81.6799	90.2406	122.207	239.054	219.64	250.961	161.861	218.998	175.549
Pa2g4	13.0909	18.7023	32.494	71.4116	79.0291	90.7759	243.89	281.049	271.834	233.897	227.028	133.688
Atp11a	405.417	397.939	302.39	82.3698	77.2972	75.5544	62.6701	55.9389	55.8829	60.7063	52.6723	68.8743
Hacd4	202.212	207.616	198.141	199.586	196.15	192.45	61.4448	55.5249	56.6896	89.1097	80.9706	176.423
Eef1g	16.3561	20.3259	24.0731	97.8226	127.829	108.569	228.022	261.599	281.378	152.104	245.325	155.802
Zbtb7b	272.971	219.033	228.82	150.007	169.004	176.009	66.7699	60.9659	65.4015	98.2017	68.7668	145.504
Il18rap	501.232	568.377	465.882	31.0752	30.5529	43.3174	12.316	14.5237	11.6877	14.2839	19.0206	18.463
Dock5	384.901	378.502	385.791	79.6334	81.2391	114.449	53.4057	43.0641	69.5291	43.4466	42.9932	55.6203
Degs1	244.467	258.31	291.231	154.115	153.704	179.372	59.8123	63.6108	63.2129	59.1438	78.6707	127.851
Actn1	642.272	608.706	466.366	2.96297	3.47494	10.3537	1.21625	1.35266	1.15768	1.93436	1.80166	0.289789
Gng12	64.0282	73.0492	93.6713	94.0469	87.6226	111.763	241.844	230.292	261.16	169.026	180.019	136.416
Ptprj	194.358	188.895	164.554	238.784	243.4	244.512	60.6948	65.7499	60.5267	74.2455	67.5286	152.334
Golim4	348.486	401.269	460.048	40.447	41.804	105.716	53.2204	57.5171	85.989	48.9518	58.2948	57.1216
B430306N03Rik	501.564	428.656	396.909	88.8222	88.47	126.62	13.1483	11.3383	18.3245	14.5562	16.5231	55.8372
Ipo5	18.5346	24.8081	35.9198	113.39	108.976	102.697	288.454	257.873	250.556	185.466	225.627	158.931
Gm2000	16.5993	23.0526	36.9631	125.655	151.628	183.671	187.786	253.001	296.605	137.568	202.877	162.919
Glrx	397.044	404.457	375.643	79.6338	86.5432	111.596	57.2168	54.548	71.0708	52.2252	50.2524	44.0445
Fbxl5	203.733	273.767	237.516	238.187	224.804	171.255	72.846	70.1412	64.1577	49.7702	78.5018	106.321
Rpl23a-ps3	19.1925	33.7931	59.7908	182.246	199.87	89.2589	236.506	255.545	227.464	71.251	215.021	204.383
Eef1b2	18.9741	24.6569	35.0778	162.6	167.322	146.204	234.319	228.679	264.918	144.431	216.686	165.124
Svil	382.775	375.74	382.932	111.257	124.462	111.875	53.2401	49.1437	63.2129	39.7269	48.0017	71.0159
G3bp1	26.0383	31.3735	47.2892	102.345	98.8475	106.264	291.108	251.669	261.902	224.272	215.64	158.957
Stk17b	230.913	318.434	409.316	139.044	133.005	183.343	54.1788	54.6042	67.2413	52.374	68.4851	106.784
Anp32e	27.6187	40.375	66.4511	68.0692	78.7518	99.8989	261.893	251.236	268.066	242.675	253.117	165.298
Rpl28-ps1	25.6507	32.7271	63.6452	96.2055	179.086	234.191	164.685	214.108	408.84	88.0404	131.388	186.384
Mcm5	31.4281	32.729	56.5734	62.369	76.2172	105.271	304.744	257.208	277.866	229.58	220.085	180.634
Lmnb1	41.3913	51.4863	94.1766	67.5761	72.5103	91.8955	273.933	271.331	272.094	191.565	234.662	186.713
Samd9l	417.942	533.893	605.971	41.872	38.9537	99.9545	11.9846	11.0898	22.9775	14.9534	17.4449	36.4049
Arhgap4	377.71	321.011	274.949	128.038	127.678	122.485	77.251	82.3582	76.8373	77.2249	83.7254	106.893
Eif3b	35.3841	35.4243	48.8282	124.409	123.525	125.251	292.044	258.385	271.151	167.983	215.699	162.578
Rps12l1	16.8488	30.6164	41.6769	127.18	188.903	166.238	203.638	274.749	332.697	99.9968	215.435	169.212
Dmxl2	380.288	416.455	379.01	129.397	114.481	109.356	56.5537	54.1539	60.1846	40.626	52.3372	84.7399
Cxcr2	535.448	592.228	667.753	8.71427	10.7006	23.1139	7.17975	9.5699	9.0518	6.17486	6.69665	4.22514
Nedd9	282.928	298.575	284.992	181.465	192.936	171.145	73.7845	75.9947	81.3656	71.1214	78.7831	117.78
6430548M08Rik	477.283	452.209	379.351	148.798	164.168	137.563	19.6061	19.2522	14.9205	20.905	17.2761	61.2342
Nucks1	32.5269	39.3848	81.0555	87.416	84.9935	100.342	286.563	255.903	292.051	225.485	249.952	183.107
Rrm1	45.7136	40.9801	80.9314	77.825	71.9467	108.014	303.477	280.17	303.634	198.783	246.198	161.594
Alas1	95.0168	96.5221	144.304	106.818	118.18	167.466	232.731	208.503	348.76	125.8	129.769	152.923
Sf3b3	41.6111	40.0999	55.6754	121.066	130.142	132.247	283.425	244.648	270.855	199.304	228.247	184.744
Myadm	187.396	184.77	165.117	260.768	287.783	250.553	68.7834	71.5481	55.9015	114.568	97.1284	189.026
Maz	59.5596	57.5373	74.5889	126.712	127.188	134.149	292.042	222.698	268.069	202.503	184.86	191.113
Nsd2	54.7115	69.4915	102.625	89.7384	88.1004	121.516	269.606	239.304	272.691	187.783	249.271	196.873
Ncf4	272.452	282.079	260.416	180.423	193.173	186.141	89.2487	87.6481	99.5192	85.4793	85.1982	139.194
Trim28	28.571	36.6345	41.0269	114.161	131.644	110.14	332.584	259.511	284.577	216.639	221.156	184.339
S100a6	366.603	538.808	562.81	89.609	102.217	118.534	13.5862	20.8285	18.5014	20.9794	37.816	71.42
Sp140	330.392	325.769	335.217	137.568	145.227	171.004	75.1405	80.8275	103.324	87.2961	88.4867	103.206
Gns	99.3392	87.2396	75.1505	369.989	347.105	314.856	101.122	87.5918	94.0978	110.252	102.979	197.308
Snd1	40.2192	35.3694	45.2924	177.082	184.585	143.719	296.41	239.862	284.537	180.928	195.159	179.188
Smpdl3a	88.6434	88.3957	92.998	398.441	406.244	373.122	76.988	72.1113	107.924	64.4259	60.2691	187.928
Pbxip1	293.474	277.288	243.411	191.767	191.342	166.162	104.547	97.4431	86.5383	124.983	109.621	135.954
Gm7536	25.9015	27.0742	49.6867	161.763	197.128	227.035	229.577	258.386	371.735	131.688	183.138	170.347
Gsn	493.173	438.614	400.894	101.939	107.286	150.324	46.6125	40.9251	61.9194	50.7374	46.8758	94.8032
Ppp1r18	284.393	274.862	290.667	157.4	176.931	212.219	81.1852	87.367	80.7195	124.76	97.4661	169.116
Ifitm3	211.818	199.689	227.875	279.415	330.379	454.899	35.9612	30.3341	57.0122	39.5087	21.2898	161.928
Topbp1	55.457	46.3157	78.2934	98.6512	102.031	124.411	292.82	277.858	279.608	236.055	268.143	200.95
Sema4a	291.059	238.177	203.28	214.126	226.304	228.004	92.6177	87.2543	103.199	100.507	85.93	191.749
Atad2	40.6586	52.6964	103.325	94.1022	93.4413	136.725	270.288	270.205	308.252	218.275	267.075	223.754
Rab6a	359.967	378.001	435.958	102.315	106.107	140.396	76.7749	87.5261	105.786	97.8445	98.9768	108.068
Fam129a	333.99	328.72	366.269	264.334	264.842	252.342	37.3894	37.8854	36.0575	36.751	39.1103	108.694
Rpsa-ps10	25.5965	28.2774	56.94	171.698	164.224	259.072	274.874	250.046	390.403	136.633	169.922	217.323
Ncapd2	65.8596	59.6824	104.448	76.4546	88.8893	120.325	327.148	292.441	320.64	245.801	255.987	195.741
Megf9	424.682	521.408	610.351	80.2362	79.5499	149.707	40.7584	38.7296	68.8327	34.8912	39.2228	67.0799
Hmga1	29.8507	26.074	30.8902	102.815	122.044	80.8186	412.277	370.874	283.866	304.11	268.295	126.205
Tgfbi	108.058	107.594	117.918	429.871	481.364	517.201	36.34	37.7163	47.0487	43.2977	32.8637	207.261
Ddost	48.2043	47.9659	54.0478	141.564	154.688	154.521	306.682	259.736	316.76	220.804	220.255	243.085
Kif21b	520.417	427.901	318.633	170.171	168.717	124.969	79.4729	75.2633	69.7286	80.9415	68.541	88.8413
Pdcd4	28.3948	36.2772	31.7602	175.336	180.762	158.862	303.563	311.182	356.47	210.365	238.26	181.326
Tlr13	248.494	290.6	258.059	352.349	369.871	304.676	47.3305	49.1438	33.3223	52.374	59.4813	147.934
Set	43.8551	44.2541	59.0774	113.612	110.748	128.67	325.836	303.744	330.221	319.598	260.814	186.147
Slfn2	255.696	302.639	349.4	267.337	282.234	262.102	54.1956	60.9915	68.7081	55.6165	76.0645	192.265
Trp53inp1	361.834	527.464	445.739	176.091	160.508	94.2456	77.8166	74.3068	60.5764	68.3693	110.803	73.3885
Apobr	406.688	410.207	365.1	188.277	202.219	229.367	50.5356	62.1906	54.9819	81.3447	74.5761	133.813
R3hdm4	561.5	487.007	329.067	80.0879	97.3694	108.503	111.195	90.9284	106.036	105.989	83.0933	100.097
Adam8	798.094	702.039	566.188	52.9974	51.813	66.7668	5.74382	5.5168	3.82966	8.10912	5.9651	18.7524
Slc2a3	690.022	801.445	677.676	9.42676	11.4984	21.7147	22.257	18.3516	11.1904	14.2095	15.9818	6.77174
Pglyrp1	805.111	762.496	599.913	16.8804	20.8849	68.3338	3.1481	2.70216	19.3468	2.15755	3.20769	2.02581
Hdgf	59.5594	61.3874	91.7071	114.435	118.785	160.174	308.059	313.662	330.78	298.991	262.347	202.627
Fyb	209.09	186.696	199.261	370.403	341.188	430.632	64.6209	73.8577	73.1924	110.813	79.8827	204.603
Cds2	387.043	396.274	355.504	224.311	215.135	152.671	117.415	92.9951	100.118	93.1418	109.454	126.348
Klf6	338.234	367.393	392.081	232.325	237.055	246.079	64.617	68.5084	69.3797	99.5402	97.0718	187.464
Cd84	252.815	340.434	317.157	288.718	267.887	265.111	91.734	100.033	108.72	92.1752	118.962	189.317
Rpl10a-ps1	23.9874	22.2849	31.3858	189.862	237.907	216.627	362.128	297.953	411.085	160.647	237.591	250.715
Sema4d	278.164	236.629	212.6	306.198	315.186	363.266	107.807	104.593	92.5067	139.864	124.084	222.715
Stk10	324.098	282.074	260.36	336.509	348.424	335.85	87.2604	79.9923	85.4939	120.073	85.2545	179.999
Cbx5	42.4902	49.8909	92.0433	97.1721	91.9875	117.415	438.614	385.826	363.516	279.128	354.807	229.949
Cd34	7.9853	6.48782	5.21965	91.8589	95.1792	94.3106	431.351	383.476	392.077	354.219	406.033	305.248
Ccpg1	402.782	447.411	456.527	192.969	193.012	206.906	100.553	105.098	137.764	97.7381	111.624	147.868
Itgb2l	932.847	908.438	703.377	5.04226	8.58866	34.4749	1.82263	0.957079	0.54718	1.93436	2.81378	0.463118
AI506816	19.0123	14.1482	25.4018	93.3849	101.616	105.292	467.181	417.798	448.934	345.206	355.341	220.771
Rpn1	79.3392	83.0051	85.9822	142.824	159.57	150.827	377.76	352.791	386.532	265.813	308.66	242.274
Cd52	377.136	395.168	472.622	188.15	232.36	364.055	65.0035	72.5054	111.704	96.7132	68.7664	196.899
Anxa11	779.048	655.175	484.47	90.606	104.886	127.269	64.8444	65.3908	72.267	83.1413	63.2734	92.3911
Gm12918	39.8181	34.4186	49.1	227.563	247.512	213.998	373.113	378.623	370.408	217.222	302.316	245.939
Ripor2	551.263	563.414	492.438	137.509	135.774	149.595	101.841	93.6155	103.497	101.623	113.279	157.137
Slc6a6	452.589	414.601	304.56	235.063	243.155	239.365	131.498	114.499	103.896	204.809	125.322	169.562
Plek	323.731	399.233	462.197	264.933	254.568	291.695	96.2625	94.5159	97.2805	116.352	145.185	196.669
Vasp	712.587	654.425	543.404	103.036	116.391	155.64	77.3746	69.6906	103.696	70.6751	61.5073	92.3725
Mcm6	30.7686	32.6738	76.8911	97.227	103.062	147.975	461.941	435.811	417.719	307.616	414.397	254.381
Rps18	35.1642	32.619	56.2186	231.146	285.399	271.607	357.111	343.543	463.977	212.266	290.692	276.711
Fosl2	229.303	232.734	246.613	372.348	378.089	358.235	138.843	125.871	133.288	164.858	139.784	352.757
Lrrk2	597.721	662.912	653.946	196.755	182.565	178.753	62.7947	62.4291	82.8085	56.3913	65.0524	113.035
Mgat5	70.475	67.488	82.447	111.257	110.571	131.743	510.244	449.157	557.174	294.309	323.511	210.734
Pram1	990.561	732.184	528.195	78.8114	84.1133	131.749	42.9465	47.7569	55.1647	103.17	57.5184	70.2403
Lilr4b	560.494	643.969	461.583	378.902	328.236	270.412	28.5961	26.9632	26.3526	42.635	35.2911	120.294
Fxyd5	337.578	288.51	328.266	265.812	294.922	466.749	105.044	133.639	174.619	176.092	114.911	250.784
Cpne3	558.815	692.192	736.639	97.7742	93.7233	167.561	100.791	90.1249	130.852	88.5289	100.73	97.6393
Nap1l1	32.6984	38.2727	67.1584	167.264	167.242	201.431	369.444	430.822	413.753	330.305	465.262	291.766
Gstm1	28.6411	24.7689	43.5705	192.026	245.368	256.247	359.632	382.213	486.67	364.926	315.189	319.308
Eif4a1	33.7719	62.7693	101.075	239.468	247.303	210.861	432.871	363.095	448.793	260.784	319.868	300.162
Kdm7a	331.295	455.19	456.919	410.06	362.289	306.149	97.1885	98.2545	90.7163	96.0502	144.101	197.185
Arrb2	914.197	830.711	634.866	77.3861	87.2	135.157	50.6996	51.7896	76.293	58.6231	50.9277	78.8289
Acsl1	645.823	631.588	508.974	169.923	187.215	185.67	130.856	130.231	150.263	118.882	114.068	127.852
Ifitm6	845.001	1116.48	840.781	97.1719	110.62	140.586	7.51113	9.96394	8.85285	8.77867	7.42821	26.1607
Gm10275	24.6509	35.874	42.9613	231.409	241.763	241.218	463.118	457.436	503.384	315.348	415.003	256.341
Hnrnpab	66.9551	84.8726	147.728	158.045	168.218	254.161	418.769	447.121	495.705	345.649	375.472	285.432
Ivns1abp	37.362	43.9497	55.0578	250.023	223.721	187.362	486.501	412.734	403.805	331.643	488.841	328.626
Pag1	582.618	641.115	477.451	317.495	315.288	200.471	125.147	112.417	84.2005	125.727	132.132	145.214
Lgals3	587.652	534.349	424.442	336.727	377.593	358.566	75.3307	71.3796	60.8253	113.602	95.8904	260.214
Vcl	625.249	585.705	561.467	205.486	224.583	216.381	129.126	121.973	103.006	175.985	176.314	203.781
Plbd1	1052.88	990.531	847.81	97.6091	105.128	201.192	5.63336	6.58637	11.8369	5.20773	6.30274	29.6334
Add3	410.749	458.48	346.22	359.182	360.579	312.675	163.475	159.475	144.13	187.181	189.141	287.714
Alox5ap	505.93	481.272	371.768	362.882	409.498	365.219	154.397	138.586	159.798	143.518	136.159	238.044
Npm1	15.413	28.7035	41.8136	196.457	221.495	188.313	463.914	575.823	572.868	371.465	508.411	297.471
Nbeal2	815.584	660.368	504.514	196.589	205.939	220.67	169.054	130.263	153.233	166.794	129.148	224.623
Grina	1231.71	901.427	574.995	150.004	168.718	139.297	64.0092	70.0848	62.566	75.7338	58.3559	96.5401
Dnmt1	103.002	98.407	149.626	175.548	172.617	234.941	515.616	487.177	510.889	445.93	419.176	351.877
Cotl1	647.72	551.171	461.009	306.97	342.584	313.567	175.404	151.537	167.162	171.926	152.611	261.955
Mxd1	1137.84	1163.81	1061.1	46.5305	50.5928	56.0775	31.3697	28.034	31.2334	31.0227	35.0585	33.048
Rpl13a	51.0232	56.868	62.342	323.676	352.961	281.742	513.242	516.232	569.652	311.396	433.596	356.399
Prtn3	20.5858	20.9026	53.4878	286.87	290.987	287.897	621.701	513.75	727.496	455.734	344.738	387.37
Ccnd3	645.862	503.94	528.56	357.106	354.468	432.775	202.062	180.12	197.819	208.777	159.777	347.289
Ssh2	370.903	396.164	375.015	570.18	544.02	486.019	200.421	199.729	182.673	240.221	246.706	339.911
Serbp1	95.0167	87.6807	145.924	184.024	189.085	289.815	489.876	588.922	661.809	625.74	491.657	305.648
Akna	780.132	643.797	514.716	331.577	336.551	352.302	193.519	176.141	167.954	239.179	200.615	278.622
Cnn2	858.61	732.839	734.797	249.805	265.537	350.851	146.134	140.507	192.37	183.531	139.784	249.973
Arfgef1	717.199	815.404	923.426	201.138	192.375	291.524	172.368	165.447	241.96	135.398	194.481	200.197
Pirb	600.653	549.556	384.998	721.42	710.984	571.381	85.3461	96.6036	63.9645	147.957	110.536	293.646
Csf3r	982.106	790.994	671.841	333.987	339.889	321.974	124.593	117.425	166.112	140.382	102.869	251.483
Myb	94.8005	107.431	140.412	234.911	234.673	254.199	578.503	622.721	749.188	465.54	492.501	375.386
Nfam1	626.929	581.228	595.492	422.616	449.474	481.352	176.068	161.505	221.024	173.859	167.975	329.208
Rpl3-ps1	35.554	43.3935	66.9137	414.456	409.149	313.061	695.812	571.116	628.574	322.954	569.898	469.606
Cyfip2	1311.12	1192.47	1019.47	138.988	156.373	217.09	106.533	98.7939	157.561	70.3775	52.1093	36.3468
Hsp90aa1	76.2467	87.1366	171.947	186.212	181.649	301.097	639.788	663.449	803.138	428.351	626.399	394.599
Rps6-ps4	64.137	57.2698	98.3417	289.465	439.316	294.847	590.728	649.761	745.508	403.877	511.722	466.888
Ckap4	1189.27	1067.19	894.767	107.199	114.61	187.319	164.637	144.954	204.003	205.032	167.862	182.027
Top2a	138.459	141.697	329.674	182.286	169.377	271.544	644.844	627.377	752.178	399.351	563.638	520.058
Ppia	122.41	97.3737	134.04	253.849	346.238	356.479	647.444	635.692	664.571	435.881	609.577	471.271
Eif5a	184.223	168.628	199.788	261.147	293.229	313.838	662.562	606.278	696.837	553.379	462.54	377.124
Nhsl2	886.74	884.429	874.574	378.333	364.891	420.468	139.507	131.445	187.252	130.414	138.771	258.537
Lsp1	613.415	518.752	520.885	620.292	723.959	651.376	140.668	161.673	114.589	238.36	206.973	378.923
Pygl	1050.32	1109.05	988.964	342.867	371.063	335.511	107.42	105.099	142.941	71.0476	92.5688	196.611
Txnip	522.946	538.994	444.053	581.549	603.744	577.58	245.712	228.607	224.256	268.088	289.691	413.361
Anxa2	620.064	680.309	644.875	464.63	540.336	458.848	233.002	234.639	205.999	283.221	366.383	416.302
Cd33	1413.23	1546.61	1343.77	248.983	241.325	182.056	38.6598	43.796	40.7825	59.3671	44.2312	33.8583
S100a11	1623.86	1238.81	1051.83	135.48	190.85	252.959	93.0324	113.83	180.593	177.196	75.9949	106.859
Samhd1	499.628	489.725	431.705	775.72	773.203	758.278	194.899	209.353	202.222	258.893	258.69	419.607
Ctsg	21.0986	24.4781	51.1855	218.679	268.507	302.768	799.942	828.056	1265.06	524.116	538.13	471.896
Retnlg	1589.13	1870.94	1835.04	6.57683	11.5923	35.2583	2.31968	4.55982	0.54718	8.18352	5.68373	1.09977
Ceacam1	1524.85	1288.66	1278.51	243.037	243.249	378.862	51.1926	52.0466	91.5321	85.8146	63.4993	109.081
Fmnl1	711.364	610.776	507.421	567.418	627.138	524.965	253.622	242.048	186.15	395.035	321.839	478.256
Syne1	1525.92	1503.67	1279.4	120.355	129.346	283.524	106.038	106.731	201.427	72.0143	90.9384	105.626
Adpgk	1758.87	1920.88	1667.75	65.9047	66.1978	166.677	50.3523	45.1681	65.1315	39.5038	40.6659	42.4562
Hnrnpa1	62.9957	88.4409	113.803	389.305	414.03	347.457	875.353	796.588	818.852	615.858	838.754	570.825
Nup210	112.159	102.037	95.4677	282.202	302.531	241.272	1040.41	826.218	726.377	884.117	875.22	672.05
Zyx	1147.57	829.151	728.675	562.462	647.951	649.074	203.818	204.975	214.576	332.617	185.323	470.438
Neat1	835.158	1037.54	656.625	823.185	827.942	399.887	250.222	257.557	165.454	296.396	316.712	310.838
Lyst	985.082	1183.12	1287.9	659.478	621.458	580.58	188.768	190.551	257.376	144.847	183.733	371.285
Lilrb4	857.762	1053.93	928.785	1164.4	924.945	795.679	130.628	145.316	119.262	133.592	170.633	506.777
Anxa1	1819	2078.66	1914.03	234.785	242.314	345.746	74.0056	64.1174	114.987	61.4501	81.5401	137.518
Tubb5	174.502	176.405	326.476	396.737	429.246	485.898	1152.58	958.878	1088.88	739.562	731.232	750.551
Il17ra	667.338	706.613	548.221	1164.66	1250.28	840.914	361.416	346.204	243.591	392.427	390.699	635.647
Vsir	1372.46	1215.46	1163.69	727.643	782.622	861.239	217.21	204.458	276.818	247.435	227.291	537.642
Tuba1b	164.296	158.609	308.292	365.32	403.882	423.209	1112.33	1067.09	1060.58	1033.09	903.024	848.775
Hipk1	1205.2	1270.52	1445.71	612.38	593.823	686.631	369.288	344.342	435.666	334.485	367.079	555.235
Olfm4	2439.74	2882.07	2965.85	13.7564	24.0293	107.845	4.9154	5.12275	16.3131	5.50531	8.55369	3.00972
Elane	73.4786	68.2633	191.496	287.458	303.181	703.541	1329.56	1255.73	2816.57	510.645	449.176	563.899
Thbs1	3147.21	2948.87	2118.14	248.515	264.179	233.376	9.66501	10.4143	13.0306	13.4655	11.3111	31.3696
Slfn4	1792.45	2105.01	2083.63	674.584	601.064	601.924	236.742	204.639	235.39	151.008	224.368	338.357
Calr	233.846	253.356	285.276	500.95	554.908	674.349	1148.44	1272.08	1873.27	912.94	961.319	873.265
Cdk6	209.741	188.735	193.624	688.063	666.231	411.095	1550.77	1413.74	1086.66	1490.22	1325.46	621.906
Ptprc	996.063	1248.91	1321.18	1121.98	1041.6	1016.05	466.067	455.019	432.693	423.536	610.328	747.033
Ptma	112.559	132.88	318.448	470.434	497.87	717.996	1514.1	1419.9	1889.83	1000.81	1147.74	883.495
Ncf1	2268.85	2129.39	1967	450.205	483.578	627.599	385.153	370.259	447.731	376.329	405.836	447.345
Sorl1	2019.78	2070.65	1993.16	818.751	852.327	898.326	314.71	278.707	340.027	267.155	263.465	505.81
Cd177	2978.83	2626.86	2488.02	492.604	582.851	926.005	98.4167	90.0687	228.233	81.3135	76.1383	391.772
Tmsb4x	1454.01	1611.63	1742.48	763.93	811.576	1486.67	418.433	470.714	663.977	690.236	471.179	720.662
Itgb2	2380.54	2271.79	1943.34	1088.42	1215.17	1271.51	288.836	279.946	422.271	257.1	257.792	641.66
Itgam	2671.47	2742.55	2620.2	1111.23	1115.26	1330.19	123.6	134.09	183.119	139.267	129.99	538.422
Mmp9	4850.43	4228.12	3674.43	15.291	34.4482	36.7694	7.62157	7.54335	1.84028	9.52262	11.705	2.89397
Mmp8	3907.03	3860.8	3714.75	504.216	537.606	306.019	61.3032	70.5351	41.6279	128.926	106.132	186.307
Hsp90ab1	342.315	336.682	362.589	970.974	1052.21	1019.68	2208.53	2079.43	2168.69	1938.26	1927.47	1389.25
Camp	5119.03	4965.39	5005.61	44.0094	79.0805	944.976	7.17975	8.61291	65.1026	18.5244	12.7742	4.80392
Cybb	1969.2	2156.68	2460.38	1988.17	1971.75	1900.34	555.758	529.153	549.915	657.129	622.834	1059.49
Psap	567.402	550.408	513.324	3557.23	4089.32	3081.78	954.065	857.693	650.658	907.178	982.856	1670.19
Mpo	134.473	98.6259	385.479	515.579	579.972	934.414	5149.83	4608.08	9084.08	1806.84	1139.85	695.64
Myh9	4861.2	4428.68	3834.76	1676.47	1769.59	1793	1158.84	1107.53	1175.71	1222.81	1071.72	1511.77
Flna	4049.5	3901.44	3769.07	3298.82	3276.56	2822.51	1377.25	1181.63	1314.57	1239.15	1393.2	2420.97
S100a8	17730.2	13243.7	15752	109.121	186.93	1767.25	19.827	26.5703	172.782	49.3238	41.1359	14.1222
Chil3	5349.18	6145.71	7584.96	10996.4	9940.51	4908.76	820.288	769.444	685.299	633.684	779.625	1166.75
S100a9	18277.1	18738.8	27089.1	120.465	224.201	2385.92	23.3615	41.3757	212.665	46.199	67.0786	15.9164
Lyz2	8896.04	9515.24	11795.7	12542.4	13089.4	16169.6	1320.82	1334.24	2357.92	1113.96	1092.31	7045.28
Ngp	45121.1	35758.4	32931.9	263.124	491.425	4330.55	45.8946	57.644	165.069	105.641	94.7648	33.5111
