# Supplementary material for: Molecular Mechanisms in Murine Syngeneic Leukemia Stem Cells
Source: Cancers (Basel). 2023 Jan 24;15(3):720. doi: 10.3390/cancers15030720 (PMC9913241; doi:10.3390/cancers15030720)
Supplement: Supplementary file 1 [file cancers-15-00720-s001.zip › supplementary table S3. surface markers of LSCs .xlsx]

## Sheet: גיליון1
Table S3. Surface markers of LSCs.
Gene Symbol	P11 #1	P11 #2	P11 #3	P12 #1	P12 #2	P12 #3	P10 #1	P10 #2	P10 #3	P9 #1	P9 #2	P9 #3
Epor	0.165784	0.168979	0.0001	0.0001	0.0563736	0.0001	0.0001	0.0001	0.0001	0.293135	0.0001	0.0001
Ephb2	2.98241	2.81474	0.199038	2.60391	2.25104	0.115855	0.274131	0.093964	0.0001	0.146617	0.220126	0.0562243
Clcn2	3.83851	2.13923	1.84028	1.0428	3.17807	2.08368	2.74041	1.97233	1.45522	0.293135	0.550166	0.505218
Cd34	431.351	383.476	392.077	354.219	406.033	305.248	91.8589	95.1792	94.3106	7.9853	6.48782	5.21965
Dkc1	118.188	128.723	129.757	126.392	115.811	62.2761	30.2531	28.0655	31.9004	5.64102	5.55577	9.20448
Nop56	174.457	175.117	158.09	130.925	139.154	85.0801	52.9254	58.7805	46.459	5.42125	8.90306	9.51237
Mybbp1a	242.216	220.389	217.031	156.748	173.998	108.98	89.547	98.1326	75.2735	16.5849	15.4228	18.7443
Gart	142.979	120.264	124.87	84.5069	89.6107	64.6985	36.7663	42.3913	46.3156	13.4218	17.5982	19.2902
Slc1a5	120.122	98.85	95.4409	79.8257	80.5279	68.1219	64.2877	63.8279	54.3425	17.9485	12.5416	20.2609
Prkdc	129.123	112.135	116.379	83.2478	119.863	90.2306	65.4386	63.546	57.3647	8.13182	12.9266	24.2458
Ramp1	121.723	94.2907	113.146	88.3066	80.3588	81.6649	54.587	60.5424	53.0553	21.9777	22.2228	26.154
Xpo4	119.761	97.0925	103.037	66.36	94.2262	72.1339	55.4064	53.364	52.6166	12.5273	21.6117	26.9371
Apoe	45.1765	47.5112	36.0079	51.258	37.3094	78.6555	344.834	395.731	489.859	27.3256	19.2524	27.3327
Pdia4	161.211	150.64	205.503	115.089	143.441	130.282	82.1545	93.4417	91.6155	25.7872	24.093	28.0622
Ide	153.699	152.273	162.483	130.414	136.576	107.015	71.2484	74.8568	79.2475	25.4209	25.6882	28.1183
Pa2g4	243.89	281.049	271.834	233.897	227.028	133.688	71.4116	79.0291	90.7759	13.0909	18.7023	32.494
Hspd1	220.74	246.407	265.077	134.078	228.457	139.588	72.6765	72.685	103.258	14.9663	22.612	36.873
Eprs	209.263	207.1	212.261	176.24	205.452	128.429	85.0048	90.861	86.8577	31.5013	27.8885	38.5014
Ulbp1	123.616	117.756	115.668	88.5126	129.355	86.2281	35.0373	33.4386	47.5803	22.1321	18.5193	39.5459
Trim28	332.584	259.511	284.577	216.639	221.156	184.339	114.161	131.644	110.14	28.571	36.6345	41.0269
Hmgb1	157.727	148.999	186.436	91.6986	142.474	99.5255	59.7858	53.8548	77.8917	26.2842	29.7373	43.3817
Klra2	9.99638	14.8614	13.6771	11.9033	9.22897	50.3534	264.987	246.633	221.843	45.5671	63.0373	61.905
Slc11a1	9.22318	10.0765	10.9914	10.7129	10.2419	44.7971	140.139	153.936	139.858	65.933	58.5271	62.6906
Il13ra1	28.9948	24.206	18.7003	27.0798	34.2144	64.186	159.65	139.717	120.046	52.0871	66.2831	62.9715
Pcna	239.054	219.64	250.961	161.861	218.998	175.549	81.6799	90.2406	122.207	34.7684	32.4476	67.2909
Gns	101.122	87.5918	94.0978	110.252	102.979	197.308	369.989	347.105	314.856	99.3392	87.2396	75.1505
Mgat5	510.244	449.157	557.174	294.309	323.511	210.734	111.257	110.571	131.743	70.475	67.488	82.447
Rpn1	377.76	352.791	386.532	265.813	308.66	242.274	142.824	159.57	150.827	79.3392	83.0051	85.9822
Nup210	1040.41	826.218	726.377	884.117	875.22	672.05	282.202	302.531	241.272	112.159	102.037	95.4677
Ptafr	26.9514	20.4907	20.1426	30.2043	28.1932	51.8582	90.3206	78.9397	87.1383	114.723	120.41	103.156
Rhbdf2	27.5036	22.0669	23.2261	29.8323	23.4662	50.4114	65.0549	61.4814	68.4459	160.659	122.17	103.774
Plaur	10.88	10.752	12.2348	13.7631	11.1985	29.8068	60.3416	66.0804	55.1261	165.787	163.533	129.029
Rab11fip1	20.4345	21.4477	25.5636	27.8236	20.7309	28.1864	44.2285	49.052	47.7572	161.095	163.645	155.369
Ptprj	60.6948	65.7499	60.5267	74.2455	67.5286	152.334	238.784	243.4	244.512	194.358	188.895	164.554
Pilrb2	3.51549	6.28237	9.25933	5.38586	4.99982	22.561	46.5169	37.3847	62.9591	180.415	167.97	165.207
Hsp90aa1	639.788	663.449	803.138	428.351	626.399	394.599	186.212	181.649	301.097	76.2467	87.1366	171.947
Clec4e	41.642	33.3255	31.9296	27.7493	39.4478	44.1027	111.859	111.651	107.341	135.381	148.464	174.659
Elane	1329.56	1255.73	2816.57	510.645	449.176	563.899	287.458	303.181	703.541	73.4786	68.2633	191.496
Antxr2	18.2254	17.3383	20.8886	19.6403	19.5833	29.8648	30.1434	36.3254	46.8432	168.714	191.039	193.795
Timp2	4.36312	4.44724	7.01267	5.6541	4.72708	11.1125	23.4023	24.9679	45.9477	260.656	236.749	206.033
Sema4d	107.807	104.593	92.5067	139.864	124.084	222.715	306.198	315.186	363.266	278.164	236.629	212.6
Ccr1	55.6148	55.2797	49.0384	75.8083	82.6097	151.87	195.603	192.562	235.559	172.524	189.828	219.558
Acvrl1	5.79905	4.84129	3.08364	6.62123	7.82213	12.5595	16.0035	19.9462	19.7	335.385	287.404	222.53
Ifitm3	35.9612	30.3341	57.0122	39.5087	21.2898	161.928	279.415	330.379	454.899	211.818	199.689	227.875
Plxnc1	8.44999	9.28743	8.00736	11.9776	11.5857	17.4212	19.8947	19.148	32.291	289.855	280.133	236.168
Fcnb	1.60171	2.08294	12.2845	2.23194	1.63203	7.06114	12.0575	15.91	71.0203	179.996	162.268	236.566
Pbxip1	104.547	97.4431	86.5383	124.983	109.621	135.954	191.767	191.342	166.162	293.474	277.288	243.411
Cd9	1.32557	1.29484	1.69108	3.49665	2.36359	1.15765	1.26064	1.59579	8.45088	223.436	300.996	252.177
Tlr13	47.3305	49.1438	33.3223	52.374	59.4813	147.934	352.349	369.871	304.676	248.494	290.6	258.059
Clec4a2	12.5765	13.006	48.9886	9.96899	6.7466	33.3767	103.883	104.214	134.679	178.093	209.723	262.259
Mmp25	0.0553281	0.337857	0.0001	0.669652	0.619109	0.173732	0.98661	2.4875	5.20488	360.36	303.197	270.238
Ly75	32.9712	29.779	44.8607	14.5071	26.111	24.1928	30.8011	31.0691	65.4802	273.242	287.928	273.22
Calr	1148.44	1272.08	1873.27	912.94	961.319	873.265	500.95	554.908	674.349	233.846	253.356	285.276
Ly6g	0.552381	0.281564	0.298521	0.223284	1.51949	0.347364	2.79521	3.33252	9.01053	401.037	433.315	293.359
Slc6a6	131.498	114.499	103.896	204.809	125.322	169.562	235.063	243.155	239.365	452.589	414.601	304.56
Cd84	91.734	100.033	108.72	92.1752	118.962	189.317	288.718	267.887	265.111	252.815	340.434	317.157
Kif21b	79.4729	75.2633	69.7286	80.9415	68.541	88.8413	170.171	168.717	124.969	520.417	427.901	318.633
Tubb5	1152.58	958.878	1088.88	739.562	731.232	750.551	396.737	429.246	485.898	174.502	176.405	326.476
Clec5a	33.0264	39.0674	64.1582	32.0643	38.6038	95.4967	105.665	102.874	160.73	201.318	238.724	345.878
C5ar1	2.98241	1.97035	2.23816	2.90149	1.80085	6.01934	48.2844	55.2393	46.2274	433.857	427.432	362.392
Hsp90ab1	2208.53	2079.43	2168.69	1938.26	1927.47	1389.25	970.974	1052.21	1019.68	342.315	336.682	362.589
Pirb	85.3461	96.6036	63.9645	147.957	110.536	293.646	721.42	710.984	571.381	600.653	549.556	384.998
B430306N03Rik	13.1483	11.3383	18.3245	14.5562	16.5231	55.8372	88.8222	88.47	126.62	501.564	428.656	396.909
Lgals3	75.3307	71.3796	60.8253	113.602	95.8904	260.214	336.727	377.593	358.566	587.652	534.349	424.442
Psap	954.065	857.693	650.658	907.178	982.856	1670.19	3557.23	4089.32	3081.78	567.402	550.408	513.324
Il17ra	361.416	346.204	243.591	392.427	390.699	635.647	1164.66	1250.28	840.914	667.338	706.613	548.221
Adam8	5.74382	5.5168	3.82966	8.10912	5.9651	18.7524	52.9974	51.813	66.7668	798.094	702.039	566.188
Nfam1	176.068	161.505	221.024	173.859	167.975	329.208	422.616	449.474	481.352	626.929	581.228	595.492
Megf9	40.7584	38.7296	68.8327	34.8912	39.2228	67.0799	80.2362	79.5499	149.707	424.682	521.408	610.351
Anxa2	233.002	234.639	205.999	283.221	366.383	416.302	464.63	540.336	458.848	620.064	680.309	644.875
Cxcr2	7.17975	9.5699	9.0518	6.17486	6.69665	4.22514	8.71427	10.7006	23.1139	535.448	592.228	667.753
Csf3r	124.593	117.425	166.112	140.382	102.869	251.483	333.987	339.889	321.974	982.106	790.994	671.841
Slc2a3	22.257	18.3516	11.1904	14.2095	15.9818	6.77174	9.42676	11.4984	21.7147	690.022	801.445	677.676
Itgb2l	1.82263	0.957079	0.54718	1.93436	2.81378	0.463118	5.04226	8.58866	34.4749	932.847	908.438	703.377
Ckap4	164.637	144.954	204.003	205.032	167.862	182.027	107.199	114.61	187.319	1189.27	1067.19	894.767
Lilrb4	130.628	145.316	119.262	133.592	170.633	506.777	1164.4	924.945	795.679	857.762	1053.93	928.785
Vsir	217.21	204.458	276.818	247.435	227.291	537.642	727.643	782.622	861.239	1372.46	1215.46	1163.69
Ceacam1	51.1926	52.0466	91.5321	85.8146	63.4993	109.081	243.037	243.249	378.862	1524.85	1288.66	1278.51
Ptprc	466.067	455.019	432.693	423.536	610.328	747.033	1121.98	1041.6	1016.05	996.063	1248.91	1321.18
Cd33	38.6598	43.796	40.7825	59.3671	44.2312	33.8583	248.983	241.325	182.056	1413.23	1546.61	1343.77
Anxa1	74.0056	64.1174	114.987	61.4501	81.5401	137.518	234.785	242.314	345.746	1819	2078.66	1914.03
Itgb2	288.836	279.946	422.271	257.1	257.792	641.66	1088.42	1215.17	1271.51	2380.54	2271.79	1943.34
Sorl1	314.71	278.707	340.027	267.155	263.465	505.81	818.751	852.327	898.326	2019.78	2070.65	1993.16
Thbs1	9.66501	10.4143	13.0306	13.4655	11.3111	31.3696	248.515	264.179	233.376	3147.21	2948.87	2118.14
Itgam	123.6	134.09	183.119	139.267	129.99	538.422	1111.23	1115.26	1330.19	2671.47	2742.55	2620.2
